# Supplementary material for: A Simple Strategy for Development of Single Nucleotide Polymorphisms from Non-Model Species and Its Application in Panax
Source: MDPI journal article supplement (doi:10.3390/ijms141224581), 2013-12-17
Supplement: s1 [file s1]

>JK985726|Panax ginseng||VF-Pa-G-3-2a-T7_A14 Panax ginseng var. Chunpoong cDNA library Panax ginseng cDNA, mRNA sequence.
CATTGCTATGATGGGGTCTCGGAGGGCTAACAGATGCATCAAAGATAGCCATCTTGAACGCAAACTACATGGCAAAACGTTTAGAGAACCACTACCCCGTTCTTTTCCGTGGTGTCAATGGAACAGTTGCCCATGAATTTATTGTTGATTTGAGGGGATTCAAGAATACTGCTGGTATAGAGCCTGAAGATGTTGCAAAACGTCTGATGGACTATGGGTTCCATGGACCAACAATGTCGTGGCCAGTCCCAGGAACACTCATGATCGAACCCACTGAGAGTGAAAGCAAGGCAGAGTTAGACAGGTTTTGTGATGCTCTTATCTCCATCAGAGAAGAAATTGCGCAGATTGAGAAAGGAAAAGTGGACGCTCACAACAATGTTCTCAAGGGAGCACCTCATCCACCATCACTGCTCATGGCAGACAAATGGACAAAACCATACTCTCGAGAATATGCCGCCTTCCCTGCTTCCTGGCTCCGGTCTGCCAAGTTCTGGCCATCCACTGGACGCGTCGACAATGTGTATGGTGACCGGAACCTCGTCTGCACTCTTCTCCCAGCATCACAGGTGGTTGAGGAACAAAAGGCAGCTTCTGCATAAGTTGAGGCATTACACTGCAAAATCATTGTTCCCTCAACAATATGAAATTCCCTTTTCTTCTTTCTGCTCCTCTTCTTGTGTATAATTTATACTCTTTACATTTACTGTCTTTCATCTTTTTACTATATTGATCATTTGCAGCTCTAATAAAAATTATTGTTGCT
>JK985700|Panax ginseng||VF-Pa-G-4-4a-T7_F06 Panax ginseng var. Chunpoong cDNA library Panax ginseng cDNA, mRNA sequence.
CGATCTTGGCTTGGAGGAACGGTGGTCATTTATGTTGACCATCTACTCACCCAGAAAACTTACATCAAGGAAGAAACCATTGAACGGATGAGGCTAGATGAAGAGGTTGTCATGGATTTCTTTAGGGAATACATAAGTGTTTCTAAAGTTGAAAACCGATTACAAATAATGAGCGACTTGAGAGAACTTGCTTCAGCTGAGAGCCCTGATTCTTTTACCCTCATTTATACAAATATTCTTGAACATCACCCTGACTGTCCTGCTGAAGTTGCTGAAAAAATTGTGGGAATGCGTGAAGGCATACCACGGAAGGATGCAAAAGAGGTTGTACAAGAGTGCAAAGAAATATACGAGAACTCTCTTGTTGATGGAAATCCCCCAAAGACGGGTTTTGTTTTCCCCAATGTGAAGTGTTTAGCAGCCTCCAAAGCTTTTCTATGGCGAAACTTTAAAGGATAGAGAGGTTTTGTTCGCCTGTGCTTGGATAGATGGAAGCATCAGTGATCCACTCAGTTACTGATTTTGAGTGTCGATAGTTTGGTTGAGATAGAACGTTTATTGTTCTACTCTTTTGTAGGAAAAGATTCAAAGACACGTTTATGGCCACCTTAAGTATAACTGGAGATTCTTGCAACCTTATAAATAATTTACTATTTCCTTGGTATTTGATAAAAGGTGAAAAATTATTGTTAACTGTACAAGTGAACCTCCAAATTCCACAAAATTCTAATTAACCTTTTAGTATCAATTTTTGCAGTTGTGTTT
>JK985643|Panax ginseng||VF-Pa-G-6-4a-T7_L03 Panax ginseng var. Chunpoong cDNA library Panax ginseng cDNA, mRNA sequence.
CAGTTGCACTAGGGTGTTGAATCAAAAGTGGCAGAGACAAGGGATAATTATCCTCCAGCTGCCGAGTATATAAACTACGCCAACAGATCAAATGTCAATCTTGTGGAGGCTTTTAGAAACATGCGAGTGGAAGAGGATGAATCACTTGAAAATGGAGGCCTGGATCATGAGGTTGCAGAGCAGAATGGAGATGAGATGCAAGATGATGGGCAAGAGGAGGGCCAGGAGGAGGCTGTTGTGGTGGATGCGGACTCTACGGATGGTGCAGTACTCGTCAATGGTAACGAAGCTGACGAAGAGTGGGGTACGAATAATGCAGGAAATCCGTCAGACTAAAAGCTATTGGTTGGGCCAGTAAAAATCCTAATTTTGTTGCTGTGCTTACACCACGCCACTAGGTTCAGTCAAGACGGTTGATTCCTGCTTTATTCCATTCCTTCTTGAGGTCTTTTGGAGGTTGCCTGAAAGTTATGATTGGGATCGACTGTCTAATTGCCAGTGGTGTGATTTGTAGGACATTGAAGTGTCAGCGGGGCACATACACTATATAGAGAGTATGAGCTACTAGTCCAGTATAGTTACTAAAAATTGTTCAACTATCATATTATTTATGCCCAAAATTTTCTCCATGTAGAATATAGTTGATTTGGATAACTTTTGTTTCCCCGTCTCAAGTGTTGTACACCCAAAGAATGATTATTGACGCAGTCATGATTCCTGGCTTCTGGACATAGTTGCTTTTGCAAGTCCTTGTGATGAAC
>JK985636|Panax ginseng||VF-Pa-G-15-2a-T3_O18 Panax ginseng var. Chunpoong cDNA library Panax ginseng cDNA, mRNA sequence.
TGGGAAAGGAGAATGTTTCTAGCGAGGCTTTGGAAGCTGCCCGTTTGCTTGTAACAAGTACATGACCAAGTTTGCTGGCAAGGATGCTTTCCATTTGAGGGTCAGGGTTCACCCTTTCCATGTGCTTCGTATCAACAAGATGTTGTCATGTGCTGGGGCTGATAGGCTCCAGACAGGCATGAGGGGAGCTTTTGGTAAGCCTCAGGGAACCTGTGCCCGGGTCAGCATTGGCCAGGTGCTCCTCTCAGTCCGTTGCAGAGACTCGAACAGCCATCATGCTCAGGAGGCATTGCGTCGTGCAAAGTTCAAGTTCCCTGGTCGTCAAAAGATAATAGTCAGCAGGAAATGGGGCTTCACCAAATTTAGCCGTACTGACTATGTGAAGTGGAAGGCCGAAAACCGCATTCTTCCAGATGGTGTTAATGCGAAGCTTCTGGGATGCCATGGACCTCTTGCACGTCGACAGCCTGGGAGAGCATTTATTGACGCAGTAACTGCTTAGGGATGTGGATGTTTTCAGGCAACTTATATGCTCCTGTTGAATTGAATCTTTGGGACCCAGTGTACTTGCATTATCAATGTTTCTCGAGTTATTTTCCTTTTGGGAAGGTTTTGGTTTCAAGCCAGTATTGCACTATGGTTTCTATTTTCTTATTATTACTTGCAGTTATTAATACTATGGATTCGTATTAATATTGTACGGCTTGTTCTCCTATTTTCTTGTTGGTACTTGCAGTTATTAATACTATGTATTCTTATT
>JK985615|Panax ginseng||VF-Pa-G-5-3a-T7_L15 Panax ginseng var. Chunpoong cDNA library Panax ginseng cDNA, mRNA sequence.
GTATTCTTACACGGATGAGACTGATCACACCTGAAAAGTGAAAAATTCTGACACCAATCATTTGAGTCTTACACCAAGAATGGATAGGCGGATGAGTTTTCTAGTGGGCTATGTTGATATAGCTTAGATAGGGAAAAGATACTCTACTATAGGGTAGGGCTGCACTTTAAAATCCGGGGGCCCTCCCCCTCCCCGTCCCTTACTCGTCCTTTGAAAGCCAGAACATTCACATAGAAGAGTCTCTGTATCACGCATGCTCCTCGACTGATGACAAAATGACCTTCTATCCTCTTCTAGGAATTCCTACCCCTAACAATTTGAGAGGGGAAAAAGTGGAAGAGTCTTCTGCATGAATATGCTTTCGCACGGGGAATATCTCATAGCGGGAAGGCCCAGAGATCATAAAGGATGGGGTGGGAATGGAGGCATTCCAGCCCAACATACTCCGGTGAATGGGTCGAGAGAGATAGGGGGGGGATACAGGAAGTCTAGTGAACAGTTGAGCGGCTATCCAACCATTCAATCGGCTATGGAGGGAGGTTTCAGCAAGCGGGTAAACCGATGATGACTAGTACAAACTTAGGTAGGTCGATCGTCGCTCATCCCTCGTGTTCTCTCCCGTGAAGTGATTAATCCCTAAAATGGGCATGCAATCCCTATAGAAAAGCAAGTATTCCGATTGGAGGAAATTTCCACCCTCTGATGATCCCTTCCCTATAGCCGGAAAGGTATTGAATCTTATGGATTACTTTCAGTAGT
>JK985613|Panax ginseng||VF-Pa-G-8-4a-T7_H18 Panax ginseng var. Chunpoong cDNA library Panax ginseng cDNA, mRNA sequence.
GGTTGATACAAAGGCTCACTGGTCTTTGATCGGCCACAAAAGGTGGAGATTCCGCGTGCTTTTGTTTGTGCTGAGAGCAAGATTTTTGATGTATCAGAATGGGCTATTTGTCAGGGAATGGCTTGTAGGCCAAATACCCATCGTCCAAGCTTTCATGTAAACATGGTTGGATTGGAGAAATCAACTCAAAGATCCAACTCGAGCAGATATCCATGGGATTTGGATGCTGAAATGATGGATGAAGAGGAAGAGTTTGACATTTGGCTTCAGCAAGCTCTAGCCTCTGGTCTCTTTTGTGAGACCTCCAAACGTAGAAAGAGCTGGAGTCCCTTCAAGTTGCCCCAGACGAAAGGAAAGAAACAATGGCAAAGATCACCATGGATAGCATTAGGGCAGTTGTAACAGAAAATCCTCACCTGCTCCAATCCCATGAACCATAGCTGAGAAAAAAGAAAGAGAGAAAATCAAATGAAACAAAATGCCATTGACCAAAACGGGGCCTGATGAGTCATCAACGAGATTAGTTGGAGGAGAGCAGCTGGTGCGGGTTGAGGAAATTGAAAACAACTAGTTTTACTCGGACCCTTTTGTTCCTGTAAATAATTTTGTATTTTCATGAAGCATCCCAAGTTTCAGATACCAGTTTTGTCATTGTCCCAAGTTAAATTAACTGGAGTGTTCAAAACTGAGTTGATGCTGATGCCCTTGTAAATTGATGGCTCAAATTGCCATTTATCTTGTACACAGTTTTAATTAAT
>JK985536|Panax ginseng||VF-Pa-G-11-2a-T7_K16 Panax ginseng var. Chunpoong cDNA library Panax ginseng cDNA, mRNA sequence.
TAGCTAATTTCAGGGGACCTTCAGCCAAGCTCAGGAACAGTTTTTCGATCGGCTAAGGTTCTCATTGCTGTTTTCAGTCAGCATCATGTTGACGGACTTGACCTAACATCAAATCCCCTTCTTTATATGATGCGTAGCTTCCCAGGAGTGCCTGAACAGAAGCTTCGAAGTCATTTAGGTTCCTTTGGAGTAACCGGAAATCTTGCTCTTCAGCCTATGTACACCTTGTCTGGTGGTCAGAAGAGCAGGGTTGCATTTTCTAAGATAACCTTCAAAAAACCTCACATTATACTGCTTGATGAGCCATCAAATCATCTTGATTTGGATGCCGTGGAAGCGTTAATTCAGGGTCTTGTTCTGTTCCAAGGAGGCGTGCTGATGGTAAGTCACGATGAGCATCTGATATCTGGAAGTGTTGATCAGCTGTGGGCTGTATCTGAAGGCAGGGTGACTCCTTTCGAAGGGACATTCCACGATTACAAGAAATTACTCCAGTCCTAGGAGAGAGAGAGAGAGAGATATTGAAATATGAGACTCGTCATAAACTGTACGTGATACGAAGATGGCGATATTACTGATGTGTTTATTTTTCAGTGGGTATAATTAATTAATGTAACTTGGTGCAATAATTCAGTGGCTGACATTTTTGTTACTCTTTCTGAGTGAGACCACCATTTGTAGGAAGGATGATTGATACTCCTAAAATGAAATATTATTATTTTTATGCAATAATTAATTAATAGTTTGATTATT
>JK985460|Panax ginseng||VF-Pa-G-4-3a-T7_H05 Panax ginseng var. Chunpoong cDNA library Panax ginseng cDNA, mRNA sequence.
TTTAGCCTATGCACTGAGAAGGTCTTATTGGCACGACAAGCTTATGACCTTATAGACAGCCATGTAAAACGTCTTGATGAGGATCTGAAAAACTTCGCGGAAGATCTAAAGCAAGAGGGAAAATTATCACCAGATGAGCCAGCAATCCTTCCCCCATTACCTTTAGTCCCTAAAAATGAAAAGCGTAGATCAGTTTATGCAACTCCTCAATCAAAGAGGCTTGATTACAGGGAGAGGGATTGGGAACGAGATAGGGACAGGGATTTTGAGCTCATGCCTCCTCCAGGCAGCCTTAAGAAGGATTATGCACCTATTGAAATTGATCAACCTATTGATCCTAACGAACCAACCTACTGCGTCTGTCATCAGGTGTCTTTTGGAGATATGATTGCCTGTGACAATGAGAGTTGCCAAGGAGGTGAATGGTTCCATTACCAATGCGTTGGGCTCACACCAGAGACAAGGTTCAAAGGGAAGTGGTATTGTCCAACCTGCAGGCAACTAGCGCAGTAGTTACGTGCATCCATCATGTTAGTAATTGCTTCTCATCTATGTTTGTGTGTAGCTCTGTATATATAGAAGGCGAAAAAGAAAAGTAAGAAAAATTTGTCTTTGATGCTATAATAGATGTCGTAACTACTTGTTGGAAGTCCTGGTTAAAATTCCTTCATTATCCTGTACCGGATGCTGAAATGGCTCTCGAGCCTTATTGATTTTGGCAGGGTGAATATATCTTTCTTTGCACGTTC
>JK985413|Panax ginseng||VF-Pa-G-7-3a-T7_H01 Panax ginseng var. Chunpoong cDNA library Panax ginseng cDNA, mRNA sequence.
GCAGTACTAAGTCGTCAATAGCTTTAACCTCAGCAGAGAAATTCTTCTAGGGGTTTTACAGAGGGAGAGAAAGAGGCGAACAAGATGCATTCATTTGGGTACAGAGCCAATGCTTTGTTAACATTTGCAGTGACGATTCTGGCATTTATGTGCGCCATCGCTTCTTTCTCCGATAATCTTAATTCTCCCACTCCAACCGCCCAAGTCCAGGTTTTGAATATCAATCGCTTTCAGAGGAAACCAGATGGAGATGATGAGGTCAGCATGACACTGAATATATCAGCTAACTTGCAGTCATTGTTTACGTGGAATACAAAGCAGGTTTTTGTATTCTTAGCAGCCGAGTATGAAACCCCAAAGAATTCCCTGAATCAGGTATCTTTGTGGGACGGTATTATACCTTCCAAGGAGCATGCAGGATTCTGGATTCACACCACAAACAAGTACCGGTTCATTGACCAAGGAAGCAACCTTCGTGGTAGAGATTTCAATTTGACACTGCACTGGCATGTAATGCCCAAGACTGGCAAAATGTTTGCCGACAAAATAGTCATGGCCGGTTATCGTTTACCTGAGGCTTATAGATGAGGTGGATTTTGTCCCGACTTTCTTGTAACATTAACCTACCTCATTGGGGGTAAAAGTAGACTAGGAAAAGAAAGGGGATACTTCATGTTGTTGAATTTTTGGTAAAACATAAATTTATTTGCCATTTCAATCGATAGTACTCACAATTTTGGATTCC
>JK985399|Panax ginseng||VF-Pa-G-6-4a-T7_F07 Panax ginseng var. Chunpoong cDNA library Panax ginseng cDNA, mRNA sequence.
TTTCTTCTCGATTGGTTCTATGGCGTGTTAGCCTCGCTCGGATTATGGCAAAAAGAGGCTAAGATCTTGTTTCTAGGGCTCGATAATGCCGGCAAAACTACTTTGCTTCACATGCTCAAAGACGAGAGATTAGTTCAGCATCAACCGACACAGCATCCGACGTCGGAGGAGCTGAGTATTGGGAAAATCAAGTTTAAAGCTTTTGATTTGGGAGGTCATCAGATTGCCCGCAGAGTCTGGAAGGATTACTATGCCAAGGTTGATGCGGTTGTTTATCTTGTGGATGCCTATGACAAGGAGCGTTTCGCTGAATCAAAAAAGGAGTTGGATGCTCTCCTTTCTGACGAGTCCCTGGGCACTGTTCCATTCCTTATTTTGGGGAACAAGATTGACATTCCATACGCTGCTTCAGAGGATGAGTTGCGCTTCCTCCTTGGCCTAACTGGCGTCACCACTGGCAAGGGGAAAGTGAATCTCGCAGATTCAAGCGTGCGTCCCTTAGAGGTATTTATGTGCAGCATTGTACGTAAAATGGGATATGGTGATGGATTCAAATGGGTTTCTCAAAATATAAAGTAGGTTAAATGTTGAGCGAGAAGCTTTATGATGTAATCCCTCCTCTCTTGAAGAAGAGACAAACATCCAAAAGAAAGGTTAAAATTGATATGCATTCCCCAGCTTGATTTGATCTGTAAGTGGGCTTTTTATGTGCTTTTGATCTGTGTGAAAGAAAGGCATTTAATTT
>JK985361|Panax ginseng||VF-Pa-G-13-1a-T7_K03 Panax ginseng var. Chunpoong cDNA library Panax ginseng cDNA, mRNA sequence.
CTAAACATTTCAATTGATCACAAACCCACTTTGTCGAACTTAGTTGTCTGAAAATGGGTATGGTTTTTGGAAAAATCAGTGTCGAGACACCGATATTTGAAGTCATTCAATCTACAGACGACTACGAAATCCGAAAATACTCGCCCTCCGTTATAGCTGAAGTCACATACGATCCGTCCCAATTCAAAGGAGATAGAGATGGCGGATTCATGGTATTAGCCAATTATATTGGGGCTTTGGGAAATCCCCAAAACAGAAAGCCGGAGAAGATTGCGATGACTGCTCCGGTGATCACGAAATCGGCGGAGAAAATAGCCATGACTGCGCCGGTGGTGACCAAGAGCGGTGGCGGAGGAGAGAAGAAGATGGTTGTGATGCAATTTATATTGCCGGCGAAGTATGGGAATGCTGAGGAGGCGCCGGAGCCGGTGGACGATAGGGTGGTGATAAGGGAGGAGGGCGAGAGGAAGTATGGGGTGGTGAGATTTGGTGGGGTGGCGACGGAGGAAGTGGTGGAGGGGAAGGTCAAGACATTGAAGGAGAGCTTGGAGAGAGATGGGTTTAAGGTGGTTGGGGATTTTCTGCTGGCAAGGTTTAATCCACCATGGACATTGCCTCCTTTCAGGACTAATGAGGTCATGGCTCCAATTGAGTGAAGCTTTAGCCAGATTGTTTGGTCATCTCTACACATGCAAGATTAATAAAACTGCCGGTTCTATTACTTAAATTATTGATAATAAGA
>JK985341|Panax ginseng||VF-Pa-G-13-3a-T7_F03 Panax ginseng var. Chunpoong cDNA library Panax ginseng cDNA, mRNA sequence.
GTTGAGGTGGAGTGTATTTACCCGCATATTCCATTCTTCATTTCTTCATCCATCTTGTCAAACTAATTACGTTTTCCGATTAGTTCTGTTTATTAATCGATCTTTTTGTTTCAATTTGCTCTTCCCAATTATTTTCTTTTAGAAATCTAACTTTCTTAGCAAAGAAAAGTGGGTGAAAACGCTTTAGGGATAAATGGGGAGGTTGTTTGTGGTAAATCTAGAGGGGAAGATCTATACCTGCAAGCACTGCCATACCCATCTTGCTCTATGTGAAGATATCGTTTCTAAGTCATTCCGCTGCAAGCATGGGAAAGCTTATCTCTTCAGTAAGGTAGTGAACATCACTGTCGGGACGAAGGAAGAGAGAATGATGATAACCGGATTGCACACAGTTGCTGACATATTCTGCATCAAATGTGGGTCAATTGTTGGTTGGACGTATGAGACTGCCCGCGAAAAGAGCCAAAAGTACAAGGAAGGCAAATCGGTCCTTGAGCGGTTTAAGATTTCAGGCCCCGACGGATCAAACTACTGGGCCAGTCATGAAGCACATGTTGGTGGAAGTGATGCAGATGATGTTTAACTTTGCCCCTAATTTCAAATTGTACATTCTTCCTTCCCCTAATGTTCTTACCAAACAAATTGATTTCTTATTTTTGGGGATTACTTCAATTGGCCCCAATGATATGTGTCAGTCACAATTGTTAATATTCATTTGAAAGTCATTTGATCAGTTTATAC
>JK985268|Panax ginseng||VF-Pa-G-6-1a-T7_K21 Panax ginseng var. Chunpoong cDNA library Panax ginseng cDNA, mRNA sequence.
TGGGACATGATCTCTATGATCATGATAATCCTCAAGTTTCAAATGGCAGAGTTGGTGCAAGAGATCTTCGTTTGAAGCTCCAAAAGAAGAGTATTCAAAACACAACTCAAAGTGGAAAGGGATCCCTTTCAGGAGGTATAAGAGATCTGCGTGAAAAGCTGTCCGGTACAATGACTTCGCAACCAGTGGACACTGCTCCACCAAAGCCAAGAGCAGTTCCTGAGGGAAGTAAACCTAGGAAAGTTGCAGTTGAAGCCCCTGTACCCAAGACCAAAAAAGTTGCTAGCACAGTATCTAACAAAAAGTCTCAGCACAAGGTTGAATCGGTGGATAGCTTCCTTCTGTCCTTGGGTCTTGATAAATATTCAATAACATTTCAAGCAGAGGAAGTTGATATGACTGCCCTTTACACATGAATGATGAGGACCTGAAGGCTATGGGTATACCAATGGGTCCAAGAAAGAAGATACTTCTGGCATTGGATTCTAAAGTCTGACATTGGTTATGCATAAAGTTTTACTTGCATGGATCCCCAAGCTTGCTTTAACAAATCAGCCTGCCTCCCATTTATAAGATTCACAGGCCTGCATGCAACTTTTCTGGGTTAATTTTTGGTTGTATTGCTGAAAGGTGGCTTCAACACTGATACTAGAGTATGAGAAGATTAATAGCATGGGATGGGAATTAGAAATTATGTTTGATGAATTTATTAATTTTCAACCTCAAGTTGTTTCTT
>JK985138|Panax ginseng||VF-Pa-G-2-4a-T7_H16 Panax ginseng var. Chunpoong cDNA library Panax ginseng cDNA, mRNA sequence.
GAACTAAGGTTGAGTACAGGGTATGGAATCCCTTCCGTTCTAAGTTGGCGGCTGCCATTCTTGGAGGAGTTGACAACATCTGGATAAAACCTGGTGCTCGGGTTCTGTATCTTGGAGCTGCTTCTGGAACAACCGTCTCTCATGTGTCTGATCTTGTTGGCCCTTCTGGAGTAGTCTATGCCGTTGAATTTTCTCACAGAAGTGGTAGGGACTTGGTTAACATGGCAAAGAAGCGAACTAATGTTATACCTATTATTGAGGATGCTAGGCATCCAGCCAAGTACCGTATGCTTGTTGGGATGGTTGATGTGATATTTTCTGATGTTGCTCAGCCTGATCAGGCAAGAATTTTGGCTTTGAATGCATCGTACTTCTTGAAAGCTGGAGGTCATTTTGTTATATCAATCAAGGCAAACTGCATAGACTCGACTGTTCCGGCTGAGGCCGTCTTTGCTCAGGAAGTGAAGAAACTACAAGCAGATCAATTCAAGCCTAGTGAGCAGGTCACCCTTGAACCCTTTGAGAGAGACCATGCATGTGTTGTTGGTGCATACCGTGTGCCAAGGAAACAAAAAGCTGCTGCTGCCTAGATAGTGTTGGCTCTTAGTTATTTGGAATATCAGTCTATTTATTATTATGTTGAAGTCTTTTCATCTTCAGTTTCTTTTGTTTGTAGGGGATATTTTGACAAGGTTTTGCTGAATTGAGAATGTGAGGCCAGATTTTCT
>JK985118|Panax ginseng||VF-Pa-G-9-3a-T7_F11 Panax ginseng var. Chunpoong cDNA library Panax ginseng cDNA, mRNA sequence.
TTGTTCCCGTGTTCTACTTACTCCGCTCGATTCCATGGCTGATCCGGAGCTGGAAGCTATCAGGCAAAGAAGAATGCAGGAGCTAATGGCTCAACGAGGCATTGCAAATCAGCAAAACCCTGAGCAGCAGAATGGCCAGGAGGACACTAAAAGGGAGGCTGAGGAGCGACGACAAATGATGCTTAGTCAGATTGTTTCATCTGAAGCACGAGAAAGACTTGCTCGAATTGCGTTGGTAAAGCCTGAGAAGGCCAGAGGAGTTGAAGATGTTATATTGAGAGCTGCTCAAATGGGACAGATAGTTGAGAAGGTTTCTGAAGAGAGGCTCATATCATTGTTGGAACAAATTAATACCCAAACAACTAAGCAGACCAAAGTCATAATTCAGAGGCGACGGAGTGTTCTTGATGATGATGATTAACTCAGATTGATTCATATTTGATTTTCCAGTGCGTTGTTTGTAATGTATATCGTATGCTTGATTTTGTGGCTTGCAAATTCTTATGGGTATCTAAACTTTATTATCTTTACGTCCCATTTTTTTTTTTTTGCTGTAACGTCTTCCCTAAGTTGGGCTATTAGTACAGTGTTCATGGTCTTGGACGTCTGCTAGTATGCTACAATGTTCAAGTATGTATGCTACAATGTTCAAGTATTGGACGTCTGCTAGTATGCTACAATGTTACAATGTTTGAGACGAGTAAAAATTTTCCCTGTTAATTTTTC
>JK985098|Panax ginseng||VF-Pa-G-6-2a-T7_A06 Panax ginseng var. Chunpoong cDNA library Panax ginseng cDNA, mRNA sequence.
ATAGCAAGAGATATATCCTCCGTCACGATCTTCTCAAAACCCTAGCCGTAAGCAAAGCGTTCTGAGCTTCTCCGCTTCGATCTCTGAAATTTCAATCCAAGCCATGGCAGACGTAGAAGTAGATCTTGCGGCGGGACAGCCGAAGAAGAGAACGTTTAAGAAGTTCAGCTTCAGGGGAGTTGATTTGGTTGCTCTCCTTGACATGTCCACCGATGAGCTCGTTAAGCTCTTTGGTGCCCGTGCTCGCAGAAGGTTTCAGAGAGGTTTGAAGAGAAAGCCCATGGCTTTGATCAAGAAGCTCCGCAAGGCTAAACGCGAGGCCCCTCCAGGTGAGAAGCCAGAACTTGTTAAGACCCACCTCCGTAATATGATCATTGTACCTGAGATGATTGGAAGTGTTGTTGGAGTGTACAACGGAAAGACTTTCAATCAGATTGAGATCAAGCCGGAAATGATTGGCCATTATCTTGCTGAGTTCTCAATTTCATACAAGCCTGTTAAGCACGGAAGACCTGGTATTGGTGCCACCCACTCCTCAAGGTTCATTCCTCTAAAGTGAGATCTGTTGCAATCACTGCTTATGGGAATCGTATTTTGTTTTCAAGGATGATATATGTATTGAATTTTGCTAGCTACTTTGCAATTACTGGATTGGTAGCTTATGTATGCTGTTGAAGTTTTCAAATTGGATCATGAATGTTTAAAGAGTAAAATTTCAAGAGGTT
>JK985027|Panax ginseng||VF-Pa-G-13-1a-T7_K19 Panax ginseng var. Chunpoong cDNA library Panax ginseng cDNA, mRNA sequence.
TGTCCAGATAGCAATATCTGCATCTAACACTGGTGGTGCCTGGGACAATGCGAAGAAATATATCGAGGCTGGTGCCTCTGAGCATGCCAGGACCCTTGGACCAAAGGGATCTGATCCACACAAGGCAGCTGTGATTGGTGATACCATTGGAGATCCACTAAAGGACACTTCAGGCCCATCACTGAATATCCTTATCAAGCTCATGGCCGTTGAATCCCTTGTATTTGCCCCTTTCTTTGCCACTCACGGGGGCCTGCTTTTTAAGATCTTTTAAGGGAGAAATGACCAGGGAAACACACGAATTGACCTCTTTTCCCCCTCTATAGTACTAGCATTTCTAATCGTCTATTCCATAGCTTTCACCAACAATTTTCTTTGCATCTGTTCACTTCCCAAGCAGGAAAGTTTGAAGTTAGTTTGTAGTTGGTTAATATTATTTTTGATGATCCAATGATGATGATAATTGTGATGGCAAGAAAGGATGATGAAAATTGTCACTCCTATCACAGAGGAGAGGCAAGAACCCACAAGTTGACTTTAGTTTTTAGAACACCTAGTTTTCTAGTCTTTTTATGCAAGCATGGACAACACTGGTTCTTGATGCCATTGTTTGTGTTTGAGGTTCCTAGCCTAGTTATTTTACCTCTAATGTTCTTATGGTGGATTTTTATGGACTATATCTGTTCTGAAAAGTGAAAACTGAAACCGGTTGAACAGTCGC
>JK985022|Panax ginseng||VF-Pa-G-4-1a-T7_I11 Panax ginseng var. Chunpoong cDNA library Panax ginseng cDNA, mRNA sequence.
TGTGTTCGCGGCTTCGCGCCCCAAATGGTTATTCTCCTTTCACAATAAACCCTGCTACAGCTGCTTATTAATATCACCGGCTAAATTAAGCGCCATCAGAGTGACTCACTGCCCCTAATTCCATCTCATTTCCAAGTCTTGCCTCTTGGCTCTCAAGTCTGATCTCAGACTCATCTCGCCGACCACCATCTTCGCATCAGTCTCCCGCCTCCGCTGCTCACGATCTCACTGTCCCATCATCTCATGCTCTCTATCTCTGGTCAAGCATCAACGAGGTATATCAGCTTCTGAGCTTTAGTGGTCTTCACAGAATGTCGGGTGGACCTGGGCTTGAAACTCTTGTAGACCAATTAATTTCAGTTATAACAAATGATGGGCGCAATATAGTGGGAGTTTTAAAAGGTTTTGACCAGGCTACAAATATAATTCTCGATGAATCTCATGAACGCGTTTATTCCACTAAGGAAGGTGTCCAGCAACTCGTGTTAGGTCTTTACATCATCAGGGGTGATAACATAAGCATTGTTGGGGAGGTTGATATAGAACTAGATGAAAGCCTGGAAATGTCAAAATTGAGAGCTCACCCTCTGAAGCCTGTTATCCACTGAACAATTCAAGATGAATGTTGTAAGGAAAATAGCTGCTTGAATTTAATTTGAAGTAAAACTATTAAGATTGTAAAAGAATTTAAGGAACTAAATTATTTGGAGCATTGCTTATG
>JK985005|Panax ginseng||VF-Pa-G-5-3a-T7_L13 Panax ginseng var. Chunpoong cDNA library Panax ginseng cDNA, mRNA sequence.
GGAAAAACCGACACACAAAGTCAAACACAGTCTATCTAGCTACTCCGATTTAGAAAAAATGGCACCGATTGCAGTTGGTGACTCGCTTCCCGATGGAACCCTCGCTTTCTTCGACGCCGAAGATCAGTTGCAACAGGTCTCTGTTCACTCTCTCGCCGCCGGTAAGAAGGTCGTCCTCTTCGGTGTTCCCGGTGCGTTCACTCCCACTTGCAGCGTGAAGCATGTACCCGGATTCATTGAGAAGGCTGAGGAGTTTAAGGCCAAGGGCGTTGATGAAACTCTGTTGATCAGTGTTAATGATCCATTTGTGATGAAGGCATGGGCAAAAACTTACACGGACACAAAGTTCGTCAAGTTTTTGGCAGATGGTTCAGCAAAATACACCCATGCTCTTGGCCTAGAGCTTGACCTCTCGGAGAAGGGGCTTGGCACCCGCTCTCGCAGGTTTGCCTTGCTTGTGGATGACCTCAAGGTGAAGACTGCCAATATTGAAACTGGGGGAGAATTCACTGTCTCAGGCTCGGAGGATCTCCTCAAGACTCTTTAATTTTCTCAGTTTCTTGCAATCAAGTATTAGTCTCATGACTATTTGATCAGTATCTTAATAATTTTGTTCTTCAAATACCTTGATACTTGTTTTTGAAATGTGGTTGGACTATGAAAGTCAAATAGTAATGTTGAAAGTTATGTTTTGAAAAGGTATTATATCCCATTGCATTT
>JK984994|Panax ginseng||VF-Pa-G-3-1a-T7_M21 Panax ginseng var. Chunpoong cDNA library Panax ginseng cDNA, mRNA sequence.
AGCAGAACTTTGTTTCTCCTCCTCCAGTAGCTATTCTTCCTGCTGGAACAGGAAATGACTTGGCTCGAGTTCTATCTTGGGGAGGTGGTTTGGGCTCAGTGGAGAGACAGGGTGGCCTTTGCACAGTGTTGCACCACATAGAACATGCTGCAGTAACAATTCTTGATCGATGGAAGATATCAATTGACCAACAGGGAAAGCAACTCCAATCTCCAAAATTCATGAACAACTATCTTGGGGTTGGATGTGATGCAAAGGTTGCTCTGGAAATCCATAATCTGAGGGAAGAGAATCCAGAGAAATTCTATAATCAGTTTATGAATAAAGTTCTTTATGCAAGAGAAGGTGCTAAGACCATCATGGATAGGACATTTGCAGATTGTCCTTGGCAAGTTCGAGTTGAGGTGGATGGTGTTGAGGTAGAGGTCCCTGAGGTGAGTGCAAATGGTGATTAATTTTTTTTTTGTTGTTTTTAAGCCACATTCTTTATTTAGGCGACCTATTTTTTCTTGTAATCCCTTCTGTTATTGATGAAGTCTAATCTGAACTTTAATTTTGAGGGGTAGTTTTGTACTTTCGGAGTTTCTGGTTGAATTAGAGTTTTTGGATGAATTAGAGTTTCTTATATTGTGCTATATAAGGAGGGGATACTGCATTGTATTATGTACGAAAAATCTAAAGATAGTGAAACTTATTTGCTGCCAACCGTGGACTAGCTC
>JK984985|Panax ginseng||VF-Pa-G-5-3a-T7_J05 Panax ginseng var. Chunpoong cDNA library Panax ginseng cDNA, mRNA sequence.
CAAATCTCAGTTTTATGGCCTCAAGCTCTCTCACTCCTCTTCTCTGTCTTTCCCATCTTCTTTTTCAACCAAGACTTCCATTTTTGCCAAGGTGGAAAAGGGTTCTGTGCCCCCATCATTTACATTGAAAGATCAAGATGGCAAAACTGTGAGCCTTTCCAAGTTCAAAGGCAAGCCTGTAGTTGTCTATTTCTACCCTGCTGATGAAACCCCTGGCTGCACCAAGCAGGCATGTGCCTTCAGGGACTCTTATGAGAAATTCAAGAAAGCAGGAGCCGAGGTTGTTGGGATCAGTGGTGATGATTCATCGTCACACAAGGCATTTGCGAAGAAATACAAACTTCCATTCACATAGTTGAGTGACGAGGGTAACAAGGTTAGGAAAGAATGGGGCGTGCCATCTGATCTTTTTGGTACATTGCCAGGAAGGCAAACTTATGTCCTTGACGAGACTGGAAATGTTCAGCTTATTTACAATAACCAGTTTCAACCTGAAAAGCATATCGATGAGACCTTGAAGTTACTTCAAAGTCTTTGAACCTTTCTTACTCCACGATCTCATCTCTATGTGGTTTTTTCTTCAATCTTCCCATTTAAGTCTGATATTTATGAATGTAGATCTTTAGTTTTTCTTGTACAAGTTTCGTCTTGAGAGTTATGATTTGTATGTATACTCATCATTAATTTCTACAATCGGAATGAAGAGAATTGTTTTATTT
>JK984955|Panax ginseng||VF-Pa-G-10-3a-T7_P13 Panax ginseng var. Chunpoong cDNA library Panax ginseng cDNA, mRNA sequence.
ATTTATTACCATTCTCACTTTCACGTGATCAGCACCGGCAGACAGATAGAGATCAACTTCGTCGAACCCAGTGGAGAAGATGATCGTATGCGTCGCCGTCGTCGGCCACCAGAACAATCCGCTATACATACAGAGCTTTACAGAAGCAGATGATGCCCTAAAACTTCATCACATAGTCCACTGCTCCCTTGACGTTGTCGACGAAAGAGTGAACAATCCAAAAAAATCTGGACCAACACTAAATGAGACATTTCTTGGTCTTCTTTATCCAACCGAGAATTACAAAGTGTATGGCTATTTGACTAACACGAAGGTGAAATTTATATTGGTGACAACAGATCTTGATGTCAAGGATGCAGATGTGAGAAATTTTTTCAGAAGGTTCCACTCTGCATATGTTGATGCAGTCTCGAACCCATTTCATGTTCCAGGTAAGAAGATAACCTCCAGAACCTTTGCTGAAAGGGTCGGTACTATTGTTAAATCATTTGGTTTGAGTTCAGCTGGGTGAATGACAGCCACTGTCACCTAGTATAATTGGACCTTCCAAAAATATTGTACCTTTAATGAGGGGTTTGAGTTGGGTTGGCATGCTGAGAAATTAATCAGGAGGGAACATTGGTTTGTAAGATTTACCATCCCTTTCTAGAACATGAAATTTGTCATGTATTAAATCCAGTGTTTGACGTTGATGTACTAGTAATATTCTTCATCCCC
>JK988461|Panax ginseng||VF-Pa-G-5-2a-T7_E18 Panax ginseng var. Chunpoong cDNA library Panax ginseng cDNA, mRNA sequence.
GTTTTTTGATACTGCTGAAGTTTATGGATCAAGGTTCTCGTTTGGTGCAATAAATTCTGAAACACTGCTAGGAAGATTTATCAAGGAAAGGAAGGAAAAGAATCCAGAAGTTGATGTTGCTGTTGCAACCAAATTTGCAGCGTTACCATGGAGAATTGGTCGCCAAAGTGTCCTTGCTGCTCTTAAGGATTCCCTTTATAGACTAGAGCTTTCTTCAGTGGAGGTCTATCAACTACATTGGCCAGGAATATGGGGAAATGAAGGATATCTTGATGGTCTTGGTGATGCTGTGGAGCAAGGGCTTGTGAAGGCTGTTGGCGTATCTAACTATAGCGAAAAGCGTCTTCGGGATGCATATGAACAGCTTAAAAAGAGAGGTATCCCACTTGCCTCAAATCAAGTAAATTACAGTCTCATATACAGGCTACCAGAGGAGAATAGTGTAAAGGCTGCCTGTGATGAACTTGGGATCAGCTTGATTGCCTATTCACCTATTGCTCAAGGTGCTCTGACGGGAAAGTACACAGCAGATAATCCTCCGACTGGTCCTCGAGGACGGATTTACACCCCTGAATTCTTAACTAAGCTCCAACCTCTAATAAACAGGATTAAGGAGATCGGGCTGAAATACAGTAAAACTCCAACACAGGTAGTCCTTAACTGGCTTATAGCCCAGGAGAATGTTATCCCTATTCCCGGGGCTAAAAATGCAGAACAAGCAAAAGAGTTTGGTGGAGCATTGGGATGGAGACTCAACAAAGAAGAGATTGATGAGCTTCGAGCTTTGGCATCAGAGACCAAACCGGTTATTGGATTTCCAGTTGAGAAATTGTAATCCTCACAAGTTTTAGTCATGTACATGGCTAGCTATATATAATAACTATACACTTTCAGACACATGCATGTATGTATATCCA
>JK988444|Panax ginseng||VF-Pa-G-8-3a-T7_L03 Panax ginseng var. Chunpoong cDNA library Panax ginseng cDNA, mRNA sequence.
CCTGATATCTGGAATGCTATCAAGTTTGGGACTGTGTTGGAAAATGTGGTGTTTGATGAACATACAAGAGAGGTGGAATATGAAGAGAAATCAGTCACAGAGAACACTCGTGCTGCTTACCCTATCGAGTACATTCCAAATGCTAAGATCCCATGTGTTGGTCCACATCCAAAGAATGTCATACTTTTAGCATGCGATGCATTTGGTGTTCTCCCACCTGTGAGCAAGCTAAACATGGCACAGACCATGTACCACTTCATCAGCGGCTACACGGCTTTGGTGGCTGGCACTGAGGAAGGTGTGAAGGAGCCACAGGCAACATTCTCTGCCTGCTTTGGTGCAGCTTTTATTATGTTGCATCCTACCAAGTATGCTGCAATGCTCGCTACAAAAATGGAGAAGCATGGAGCAACAGGATGGCTCGTCAACACTGGATGGTCTGGTGGAAGCTATGGCTCGGGTAGCCGTATGAAGTTGGCATACACGAGAAAAATTATTGATGCAATACACTCTGGCAGCCTTTTGAAATCAAATTACAAAAAGACGGACGTTTTTGGGCTTGAAATCCCAACTGAAGTCGAGGGTGTGCCTTCAGAAATCTTGGATCCCGTGAACACTTGGTCCGATAAGAAGGCTTACAAGGAAACACTGCTGAAGCTTGGTGGTCTGTTCAAGAGGAATTTTGAGGTGTTTACCACCCACAAGATTGGCAAGGACAACAAGCTGACTGATGAAATCCTTGCTGCTGGTCCTATATTCTGAGCTGGTGGAACTGAAGTCTGGTAGAAGTTTGAAATAAGTGATGACCTAGCGCATGCAGCAGATGGATGTAATCTTTATGTTGTTCAGTTCAAGCTTATTTAATGTGTAATATTTGTTTCCCTTCCCTCCAAGCACCCTTATGTTACGTTTGGAT
>JK988438|Panax ginseng||VF-Pa-G-10-1a-T7_E19 Panax ginseng var. Chunpoong cDNA library Panax ginseng cDNA, mRNA sequence.
GAGTTTGCGGCACAGAGGGAGGGAGAGAGAGGGAGACGCAGCTTAATCGAACAAAGAAACCATGGCTAGAGGTTTGAAGAAGCATTTGAAGAGGCTCAATGCCCCTAAGCATTGGATGCTCGATAAACTTGGTGGTGCATTTGCTCCCAAGCCTTCATCTGGACCCCATAAATCCAGGGAATGCCTGCCTTTGATTCTTATTTTGCGAAACAGGCTGAAGTATGCTCTAACTTACCGTGAAGTCCAATCCATCTTGATGCAACGACATGTTCTTGTTGATGGGAAGGTTAGGACGGATAAGACCTATCCAGCTGGTTTCATGGATGTTGTATCAATTCCCAAGACTAATGAGAATTTCCGTCTCCTCTATGACACGAAGGGTAGATTCCGCCTACACTCGGTCAGGGATGAGGAGGCAAAGTTTAAGTTGTGCAAAGTTAGGTCAGTTCAGTTCGGTCAGAAAGGCATTCCGTACATCAATACCTATGATGGGCGTACTATCCGTTATCCAGATCCGCTCATTAAGGCCAATGACACCATCAAACTTGACTTGGAGGCAAACAAGATAGCTGATTCCATTAAGTCCGATGTTGGAAATGTTGTCATGGTGACTGGGGGGAGGAATACTGGGCGAGTTGGAATTATCAAGAACAGGGAGAAACATAAGGGGAGCTTCGAGACTGTTCACATTCAGGATTCCCTTGGTCACGAGTTTGCTACTCGTCTAGGCAATGTTTTTACCATTGGAAAAGGTACAAAGCCATGGGTGTCTCTTCCCAAGGGCAAGGGTATCAAATTAACAATCATTGAGGAGGCCAGGAAGAGGAATGTTTCCCAGTCTGCTACAACTGCATAAACAAAAAATTTATGCAGGTGTTGCTATTAAAAGTTTTATCCTCTGGTCTTGCTTGCAGGT
>JK988424|Panax ginseng||VF-Pa-G-13-3a-T7_F05 Panax ginseng var. Chunpoong cDNA library Panax ginseng cDNA, mRNA sequence.
AAAAGTCTGTCACGTACTATTAACGTGAGAGAGGGAGGGAGATCCACTCACTATTAACCCTAGGTGCGGACGTGCGGTGGATTTACGGATCGACGGGGATAGTTTTGGTCGAGAATTCTGAGGCGGAAATGGCCAATTGTCTGAAGACGTCGTACCTAGAAATGATTGTTCCGATGCTTATAAAAAAATTCAACTACGCTAATGTTCACCAGGTTCCTAAAGTTGAGAAGATTGTAGTAAACTGTAGTATCAAAGATGCAGCACAGAACTCCAAGCATCTGGACGCGGTAGTGCACTATTTGACACTTATTACAGGTCAGAGGCCTGGAAAGAAACAAGCAAAGAATGCAATTGCTTCTTTCAAGAGCAGAGAAAACCAACCTCTTGGGATTGCTGTCACTCTCAGAGGGAATGTGATGTACTCATTTCTCGAACGGCTAATTACTTCTGGACTTCATAGTACAAGTGAATTCCAAGGTGTGAGGCCCAACAGCTTTGATCGAGATGGAAATGGCAATTATAGGATTGGAATCCGTGAGCAAATACTGTTCCCCGAAATCAGTTACGATGTGCTTGGGGAGCCAAGAAGAATAGATGTTCGCATTTCCACAACAGCTCAAACAGATAAAGAAGCCCATATACTTCTGGCTCTCATGGGAATGCCGTTCAGTGAGGGTGCTGCTCCCACAAACGTTGCTCAAGAAGTTGAAGCGTCACCATTTTGACTCAAAGGCAAAACAAAGAGCCCGGAGATGATTGCGTACTGATTTATATGAGTCCTTGAGAAATCACAGTTCTAATTTCTCAACTTTTGTTGAACTATCATATTATCATATCATTTAATCATTTGGGCTATGTTTGTTTACAAAAATTACACTTGTGATAAAGACTATTAATCTCAAGGCTATGTTTGTTT
>JK988354|Panax ginseng||VF-Pa-G-4-2a-T7_C04 Panax ginseng var. Chunpoong cDNA library Panax ginseng cDNA, mRNA sequence.
ATTTCAATACACTCTCTCCCCTTCGTCGTTGTAGTCAGCCATGGCTGCTCTGCAATACCTGGATTCACTTCGTAATTCCCATCCGGAGCTCTCCGATTGGTACAATACCCTAGCAGATCTGTACCAGAGGAAGCTATGGCACCAGCTCACTCTCAAGCTCGAACAATTTGTTGCCCTCGCCGTATTCCAGGCTGGTGATGCACTAATACAGCTATATCATAATTTCATCACCGATTTTGAGACTAAAATCAATCTTCTCAAGCTTGCACATTTTGCGGTCATAGTCTCCCGGAAATATTCTGAGAAAGAGGCTGCCATTAGTTATCTTGAAGGGGTGATTGAGAAGCTTCGGGCTACTAGAGAAATGCGCATAGAGGAGCCTGTCCTTTATATTAAGATGCAAATTGCTATGTTCAACCTTGAGAAAGGAGACCAAAAGGAATGCAAGAAACTACTAGAAGATGGGAAAACTACACTTGACAGCATGACTGACATTGATCCGTCTGTCTATGCCAGCTATTATTGGAATTCATCCCAATACCACAAATCTCGTCAGGAGTTTGCAGAGTTCTACAAAAGCGCTCTTCTATATTTAGCATACACCTCAGTAGAGTCCCTGTCAGAATCATTTAAGCTGGATTTGGCTTTTGATTTATCACTATCTGCATTGCTGGGAGAAAACATTTACAACTTTGGCGAACTGCTTGCGCATCCAATTATAAAGAGTCTTCTGGGGACCAAGGTTGAGTGGCTCTACTACATTCTTGAAGCATTCAACTCTGGTGATTTGGTCCGCTATCAAGAATTATGCCATGTTCATAGTGCTTCTCTGAGCGCGCAACCAGCATTAGTAGAAAATGAGAGAAAACTTCTGGAAAAGATCAACATTCTCTGCTTAATGGAAATCATCTT
>JK988322|Panax ginseng||VF-Pa-G-10-1a-T7_K05 Panax ginseng var. Chunpoong cDNA library Panax ginseng cDNA, mRNA sequence.
TAGGCGACAGTGAGGAGAATTTTGGTACTCACTCCCACAGTCCAGATCTGTTGGAATTCGAATCTGATTTGCTCTCTTCCTTCTCCCATCTCTCTATTTCATCGGAAAATCAAAACCAGAAAAAGAAGAATAAGATGTTTCTTTTCGATTGGTTCTATGGCGTGTTAGCCTCGCTCGGATTATGGCAAAAAGAGGCTAAGATCTTGTTTCTAGGGCTCGATAATGCCGGCAAAACTACTTTGCTTCACATGCTCAAAGACGAGAGATTAGTTCAGCATCAACCGACACAGCATCCGACGTCGGAGGAGCTGAGTATTGGGAAAATCAAGTTTAAAGCTTTTGATTTGGGAGGTCATCAGATTGCCCGCAGAGTCTGGAAGGATTACTATGCCAAGGTTGATGCGGTTGTTTATCTTGTGGATGCCTATGACAAGGAGCGTTTCACTGAATCAAAAAAGGAGTTGGATGCTCTCCTTTCTGATGAGTCCCTGGGCACTGTCCCATTCCTCATTTTGGGGAACAAGATTGACATTCCATACGCTGCTTCAGAGGATGAGTTGCGCTTCCACCTTGGCCTAACTGGCGTCACCACTGGCAAGGGGAAAGTGAATCTAGCAGATTCAAGCGTGCGTCCCTTAGAGGTATTTATGTGCAGCATTGTACGCAAAATGGGATATGGTGATGGATTCAAATGGGTTTCTCAATATATAAAGTAGGTTAAATGTTGAGCGAGAAGCTTTATGATGTAATCCCTCCTCTTTTGAAGAAGAGGCAAACATCCAAAAGAAAGATTAAAATTGATATGCATTCCCCAGCTTGATTTGATCTGTAAGTGGGCTTTTTATGTGCTTTTGATCTGTGTGAAAGAAAGGCATTTAATTTATTGCTTGGTAAAAATTACTTGTAGCTGC
>JK988202|Panax ginseng||VF-Pa-G-13-3a-T7_J13 Panax ginseng var. Chunpoong cDNA library Panax ginseng cDNA, mRNA sequence.
TCTAACTCTTCGAGCTCCCAACTAACTTCTCTCAGTTCTACTCTCCATCGTCCAACAATGCCTATCTTTACAGCATCTCTAATGGGATCAGCCTCAGGCCTTACTTTTCTCCCCCATCTCTCCGATAACTCCTCTTCTCTCTCTCCTCTCACAAACCCACCTTCCAATTTCCCCAAATTTTACCGGAATTCTTTTCCCCTCAAAAGACTCTCACTCTGCATCCCCAAAGTTTCTGTCGAGCAGGCTGCCGCTGCTGCCGGAGCTGTAGAGGACTCGCCTGACGATGTAAAACAATCTCGGGTATCTGCTGATTGGAAGGTAGCAAGGACTTACAGTGAAAAGGGACTCATTTACGAAGGCAGGATTGAAAATTTCAATGGTGGTGGTTTGCTAGTGCGTTTTCATTCTCTTGTGGGTTTTCTTCCCTTTCCGCAGTTGAGTCCGTCTCACTCGTGTAAAGAACCACACAAGAGCATCCAAGAAATTGCAAAAGCTCTGACTGGTTCTCTTATCTCCGTTAAGGTAATCCAAGCAGACGAAGAGCACAAGAAACTGATTTTCTCTGAGAAAGAGGCTGCCTGGTTGAGGTTTTCTAAAAAAATTAATGTTGGAGACATTTTCGATGCAAGGGTGGGTTCTATTGAGGATTATGGTGCCTTTCTTCATTTACGCTTCCCAGATGGTTATTATCATCTCACTGGTCTTGTACATGTCTCAGAGGTGTCGTGGGATTTGGTTCAAGACGTAAGAGACATCCTACATGAGGGTGATGAAGTGAGGGTGAAAATCATAAAAATAGATAGGGCAAAGTCAAGAATAACATTGTCAATAAAACAGTTGGAGGAAGATCCACTGCTAGAAACTTTAGACAAAGTGATTCCTCAGGATGGCTCAGGTAGTTCTGATT
>JK988169|Panax ginseng||VF-Pa-G-8-4a-T7_H08 Panax ginseng var. Chunpoong cDNA library Panax ginseng cDNA, mRNA sequence.
CAGACTCATCACTTATTAAAAGATGCTTGCTATTCACCTCCCTCCTCTCTCCTCCTGATTGAAGGAAAGCTCTCCCTCGAGCCATTTTCGTTCATTCTTCTCAGTTGGCGATCAGCTGTAGTTGAGCTGATTAATCTTCCGATTTCGCTTGCCGGATACCTAATCTCCCTTTCTATTTTCGGCAATCTTCTACTCGGATCTTCATCCCATCTTGATTACTAGGTCTTCTGAAGCTTGAATGGAGTGTGTGGTTCAAGGAATTATTGAAACACAGCATGTTGAAGCCCTGGAGATTCTTCTTCAAGGTCTTTGTGGTGTTCATAGAGAACGGTTAAGGATCCATGAATTGTGCCTAAAAAGTGGTCCAAACCTTGGTTCCGTAGCTTCAGAGGTCCGACTCTTGTGTGATCTTGAGCTGCCCGAGCCCACTTGGACAGTTCGACATGTGGGGGGTGCAATGAGAGGTGCTGGTGCTGAACAAATTTCAGTTCTTGTGAGGACTGTGGTAGAAAGCAAAGCAAGCAATAACGTTCTCCGTTTATTCTATGCACTTGGCTACAAGTTAGACCATGAGCTGTTGAGAGTTGGATTTTCTTTCCATTTTCAAAGAGGTGCTCAGATTACTGTCACAGTCTCTTCAGTTAATAAGATGCTACAATTGCATGCAACTGATGATGCTGTGCCTGTTACACCGGGCATACAGCTGGTTGAAGTGACTGCCCCTGCATCCTCTGAGAATTACACTGAAGTAGTTGTTGCTGTATCGTCATTTTGTGAATATCTTGCACCGCTGCTTCATTTGTCAAAACCCGGTGTTTCCACTGGGGTTGTTCCTACTGCTGCTGCCGCCGCTGCATCTCTCATGTCAGATGGTGGAGGAACGACCTTGTAGCTGACTTGGAAAT
>JK988146|Panax ginseng||VF-Pa-G-12-3a-T7_L09 Panax ginseng var. Chunpoong cDNA library Panax ginseng cDNA, mRNA sequence.
AAATCCAAATTGGGAGGGTGGGTTTTGGTTGGTGATGGAACGGAAGAGAGAAGCGCCGGAGATCGAGGGATTACCGATTGACATATTGGCTCACATCTTTTTATTCCTTTCTTGCTTCAAAGATTTGGCTCACGCAAGCAGTGTATGCAAGAAATGGAAGGAAGGGGTGAAGCAATCGTTGGGTCGGAGAGAGGCGTTGAGCTTTGCTGGTTGGAAAATGGACGATGACTCCACTGCTCGCCTCCTTGTTCATGCTTACTCCCTCAAGGAACTCGACATATCAAAGAGCAGGTGGGGTTGTCATGTAACAGATAATGTACTCTACCAAATATCTTTAGCAAAATGTGTTACCAATCTGTCCTCAATATCCTTATGGGGTATGACAGGAATATCTGACGAAGGTGTTGTTCAACTGGTATCAAGAGCAACTTCTTTGCAACACCTCAATATTGGGGGTACATTTATAACAGATGAATCTTTGTTTGCTATTGCAAACAGTTGTAAGCATTTGAAGTCTATCAACCTGTGGTGCTGCCGTCACGTGACTGAGAGTGGACTTCTGGTTCTTGTAAATAAGTGTCACAAACTTGAATCAATCAATGTATGGGGTATGAGGGTTCCTCTCGACTGCTTCATTGGTTTGGTCAACATTAGTCCAGCTCTTCACATACAACCTGAAGGCTTGTTGCCAATTGTTGAAAGTGTATCTACGTGGCCTGTCTTTTGAGAAATTATAATGGTTCTGCGGTTGCCAATAAGAACGGATTGTTTCTTATTGTGTGCGCATATATTATATTATAGAGTGTATAGGTAATTCTGTGTATTTATCAATAACCACTCAGTATGTATGGACTACAGACTTGAACCTGACAATTATCATACCTATTGATTCGTCTCTTGATTG
>JK988104|Panax ginseng||VF-Pa-G-14-1a-T7_A05 Panax ginseng var. Chunpoong cDNA library Panax ginseng cDNA, mRNA sequence.
TGAGGATTTGATAACCTCAAGGAAGAGCTAATGGTGGGAAGGAAGCAGTGTTGTCATGCTAAGCTCTGATGAGCAGAAATTCCTGGAAGCTTCCATGGCTTATGTATCTGGAAATCCAATAATGACAGATAAGGAGTATGACAAATTAAAGCTGCAATTAAAGATGGACGGAAGTGATATTGTGGTTGAGGGACCACGATGCAGTCTTCGAAGTAGAAAGGTTTACAGTGACCTATATGTTGACTATCTCAAAATGTTCCTATTAAATGTCCCTGCTGCCGTGGTTGCATTGGGATTATTTTTCTTCCTGGATGACTTGACCGGATTTGAGATCACATACCTCTTGGAGCTTCCGGAGCCATTCAGTTTTATCTTCACCTGGTTCGCTGCTATTCCCGTCATATTGTGGCTATCCCTAACATTTACAAACTTTATTGTGAAAGACTTTTTGATCTTAAAGGGTCCATGCCCGTACTGTGGTACTGAGAACACTTCTTTCTTTGGGACCATTTTATCAATATCTAATGGTGGTTCAACCAACACTATTAAGTGCACTAATTGTCAAACGAGCTTGGTGTATGATTCAAGCACACGCTTGATAACGCTTCCAGAGGGAACCAATGCTTGAATGGAGGATTAATCCATATGAAGAGATCATAAGTAAAGAACTGGTGCTAAGCCTTGGAAGTTTGCCTGGAGAGATCTGCAATACAAGCATAAAACTCAGGTTCTGAGAGGAAAGAGTTGTCACTACTGTATGATTGTTGTAGGTTCATATAAGACTCATGTAGTATGTCTGTTTATATGTGTATACCTCATACAGACTTTGTTCTCTACTAGAGAGACATGCTGTCATTTTTTAATTGGAACCTTGTGTAATATGGTATGACATATGTGTGTATA
>JK988099|Panax ginseng||VF-Pa-G-3-4a-T7_D22 Panax ginseng var. Chunpoong cDNA library Panax ginseng cDNA, mRNA sequence.
CTAACACATTATGGGTGATAGTCAGTACTCCTTTTCTCTCACTACTTTCAGCCCTTCTGGGAAGCTTGTTCAGATTGAGCATGCCTTAACAGCAGTAGGATCTGGGCAAACTTCTTTAGGGATCAAAGCTGCCAATGGTGTTGTTATCGCAACAGAAAAGAAACTTCCATCTATCTTGGTTGATGAAACATCTGTGCAAAAGATTCAGATTTTGACACCAAATATTGGAGTTGTATACAGCGGCATGGGTCCTGATTCTCGAGTTTTAGTACGAAAAAGTAGGAAACAGGCAGAACAATATCATCGACTGTACAAAGAAGCAATCCCTGTTACACAACTTGTAAGGGAAACTGCCGCTGTCATGCAGGAGTTCACACAGTCAGGTGGTGTAAGGCCGTTTGGTGTTTCACTCTTGGTTGCTGGGTTTGATGACAAGGGTCCACAACTGTATCAGGTGGATCCATCAGGTTCATATTTCTCCTGGAAAGCTTCAGCCATGGGGAAAAATGTTTCAAATGCGAAAACATTTCTTGAGAAGAGGTACACAAATGATATGGAACTTGATGATGCTGTACACACTGCTATTTTGACCCTGAAGGAGGGATTTGAAGGACAAATCTCTGGCAAAAACATAGAGATTGGAATTATTGGAACCGACAAACAATTTAGAGTTCTAACTCCTGCTGAAATTGAGGATTACCTGCAGGAAGTGGAGTAATTATTTTCTTGTCAAAGTGATTGGGAAAAACCTCATCTACCTTTCTACTGGGAAGAACATCAAGATGTCAAATTTGGCTGTAGAATCATGTTGTTGAACCACCATTATAAAACTGGATTTTATCTTTTGAGCAAGCATATTGGATCAAAACCTTTTATAAATTAAAAACTGTCGCCGACGTGAAC
>JK987941|Panax ginseng||VF-Pa-G-9-1a-T7_O21 Panax ginseng var. Chunpoong cDNA library Panax ginseng cDNA, mRNA sequence.
TATCAGTCCTCCCCTTCGTCAGTATTCAGATAGTAGACAATGGCGTCGCGGGAGCAAACCATACTGCAGTTCGCGCCGTCGCCGACGAGCCTCTCGGCAAAGGTCCACCCACTGGTGATATTCAACGTATGTGACTGCTTTGTGAGAAGACCAGACCAAGCTGAGAGAGTTATCGGTACTCTTCTCGGTTCTGTACTGCCCGACGGCACCGTTGACATTCGTAACTCCTATGCCGTCCCTCACAATGAATCATCAGATCAGGTTGCATTGGATATTGATTACCACCACAATATGTTAGCATCTCATCAAAAGGTGAATCCAAAAGAAGTCATTGTTGGATGGTTTTCAACAGGATTTGGAGTTTCAGGTGGGAGTGCTTTGATTCATGAGTTTTATTCCCGAGAAGCAACAAACCCTATCCATCTGACAGTAGACACAGGGTTCAGAAATGGGGATGCTACTATTAAAGGTTTCATCTCTGTTAACTTGTCTCTTGGAGATCATCAACTTGCTGCACAATTTCAAGAAATTCCATTAGATCTACGGATGGTTGAAGCTGAGCGTATTGGATTTGATGTCCTTAAGAAAACAGCGGTGGAGAAACTCCCAAATGATTTGGAAGGAATGGAAGTTTCAATGGAGAAGTTATTAGCTCTGATTGATGACGTCTACAAGTATGTTGATGATGTTGTGGAAGGGCGTGTTGCACCAGATAATAACATTGGAAGATTTATATCAGATACTGTAGCCTCTATTCCCAAACTATCTCCCTCAGCTTTTGATAAGCTTGTGAATGATAGTCTTCAGGATCAATTGCTTTTGCTGTATTTGTCAAGCATCACAAGAACGCAACTCAGCCTGGCGGAAAAGCTAAACACAGCTGCTCAAATTCTGTGA
>JK987902|Panax ginseng||VF-Pa-G-14-1a-T7_O17 Panax ginseng var. Chunpoong cDNA library Panax ginseng cDNA, mRNA sequence.
AGAGAGAGAGAGAGGGAGAGGGAGAGAGTGCAGAGAAAATGGCGTCGAGATTCCCGATACAGGTGATGAGCCCGAGGAAGGTCAATTCTCGTGGCCACACAACAATTAATCCCCACCATAGCTCATTCTCCTGGAGGCGCACGTTAGCATCCGATGACTTTCTTTCCTCCCTCCCCCTCGCCAATTTGTCTCCTCCAGGGCATGTGCAGCCATTATTAGTTACATGTGCTGCCGGGGCAGCGCCTGCGGCAGCAAATCTGGCTCCAGGGACGCCCGTCAGGCCTACCAGCATACTGGTGGTGGGTGCTACCGGAACTCTGGGCAGACAGGTGGTCCGTCGGGCACTAGACGAGGGCTACGACGTCCGCTGCCTAGTTAGGCCTAGACCTGCCCCTGCTGACTTCCTTCGCGACTGGGGTGCTACTGTCGTCAATGCAGACCTAAGCAAACCTGAGACAATACCTGCGACTTTGGTTGGTGTCCATACAGTCATTGACTGTGCTACAGGACGTCCCGAAGAACCCATAAAAACTGTTGATTGGGAAGGAAAAGTTGCTCTGATACAATGTGCGAAAGCAATGGGAATCCAAAAGTTTGTATTCTTTTCCATTCATAACTGTGATAAGCATCCTGAAGTTCCACTGATGGAGATAAAGTACTGCACTGAGAAGTTTCTGCAAGACTCGGGCATAAACCACATAATCATCCGCTTATGTGGTTTTATGCAGGGGTTGATTGGGCAATACGCAGTTCCTATACTAGAAGAAAAATCTGTCTGGGGAACAGATGCCCCAACACGAATAGCTTACATGGACACCCAAGATATAGCTCGATTGACATTAATAGCTTTACGAAATGAAAATGTTAATGGGAAACTTCTCACCTTCGCTGGGCCT
>JK987873|Panax ginseng||VF-Pa-G-4-2a-T7_G10 Panax ginseng var. Chunpoong cDNA library Panax ginseng cDNA, mRNA sequence.
CTCACATGAAAAAACTCGTAAAAATATACTAGTAACGCGAAGCTCTCTTGCTCTCTATATAAAGCAAACACTGCCGACTCAAACCCTATCACTCTGAAGCCACCTCCCTCTTCAAACCAGTACATTACTGTTAGCTAAAACCCTAGCTGCACAGTTATTCCTCGATCAATATCTACTGATTTCAGGTCTGATTCGAAACGATGGCGGACGATGAAAGGGAAGAGAAGGAGCTGGATCTCTCATCTCCTGAAGTTGTTACCAAATACAAGCTCGCCGCTGAGACTGTTAACAAGGCTTTGCAATTAGTATTGTTAGAATGCAAGCCAAAGGCAAAGATTGTTGACATTTGTGAGCAAGGGGATTCATTCATTAGAGAGCAGACCGGAAATATGTACAAGAATGTGAAGAAGAAGATTGAGAAGGGAATTGCATTCCCAACTTGTTTATCTGTAAACAACACGGTGTGTCATTTCTCACCGCTAGCCAGTGATGAGTCTGTGTTGGAAGAAGGTGATGTTTTAAAGATTGATATTGGATGTCACATAGATGGATTCATTGCCGTAGTTGCACACACTCATGTTCTTCACGAAGGGAAAGTGACTGGGAAAGCAGCTGATGTTATTGCTGCAGCAAACACTGCTGCTGAAGTTGCTTTGAGGCTTGTGAGGCCAGGAAAGAAGAACAAAGATGTGACCGAAGCAATTCAGAAGGTTGCTGCTGCCTATGACTGCAAAATTGTTGAAGGTGTTCTTGGTCATCAGCTCAAGCAGTTTGTGATTGATGGAAACAAAGTTGTACTGAGTGTCTCAAACCCAGATACAAGAGTTGATGATGCGGAGTTTGAGGAGAATGAAGTTTATGCAATTGATATAGTGACAAGTACAGGTGATGGAAA
>JK987813|Panax ginseng||VF-Pa-G-12-3a-T7_B17 Panax ginseng var. Chunpoong cDNA library Panax ginseng cDNA, mRNA sequence.
GTTGCGATGCCCAGAGTGGTACTGGTGTTAGTGTTGAAGCTGTCGATCATGTTTTTCAGACTAATATGCTGGATATGCTGAAGCAAACGGGGAGGCCCGAGATGGTTGTTGGATGGTACCATTCGCATCCTGGATTTGGCTGTTGGCTTTCTGGTGTAGACATCAATACTCAGCAGAGTTTTGAAGCTCTGAATCAAAGAGCTGTGGCAGTGGTGGTGGATCCAATTCAGAGTGTTAAAGGGAAGGTGGTGATTGATGCCTTTCGATTAATCAACCCACAAACTATGATGCTTGGTCAAGAGCCAAGGCAGACAACATCCAATCTTGGGCATCTCAATAAACCATCTATTCAAGCACTAATCCATGGATTGAACAGGCATTATTACTCGATAGCTATAAATTACAGGAAGAATGAACTTGAGGAGAAGATGTTATTGAACCTTCACAAGAAGAAATGGACTGATGGATTGACACTTCAGCGGTTCGATACACATTCCAAAACTAACGAGCAGACGGTTCAGGAAATGCTAAACCTAGCCATCAAATACAACAAAGCCGTTCAAGAGGAGGATGAGTTGCCACCAGAAAAGCTAGCAATTGCTAATGTGGGAAGGCAAGATGCAAAGAAGCATCTTGAGGAGCATGTCTCCAACTTGATGTCTTCAAACATAATTCAAACCTTGGGTACCATGCTTGACACTGTCGTCTTCTAGAGTTCATTGTGTTGGAGACTGAAGCAATATTATTATGTTGTAGTCACGACTTTTTCCTGTTATCTCTACTATGTACAACAATTAGAAAACTGAATCGTGTTTTATTTACCTACATGTTGTTTAATTTCATTGCATAATTTAGAGATTATCTAGACTTTTGTTCTTCCCGATTGATTGAAT
>JK987786|Panax ginseng||VF-Pa-G-6-4a-T7_P17 Panax ginseng var. Chunpoong cDNA library Panax ginseng cDNA, mRNA sequence.
ACACCCAGTGATCTCTACAGGAGGTATACCTGCCCCTGACAAGGCTCAGCCACTTGGTACCATTTCTGCAGCGCCTTGGGGTTCTGCTCTTATTTTACCAATATCATACACATACATTGCTATGATGGGGTCTGGAGGGCTAACAGATGCATCAAAGATAGCCATCTTGAACGCAAACTACATGGCAAAACGTTTAGAGAACCACTACCCCGTTCTTTTCCGTGGTGTCAATGGAACAGTTGCCCATGAATTTATTGTTGATTTGAGGGGATTCAAGAATACTGCTGGTATAGAGCCTGAAGATGTTGCAAAACGTCTGATGGACTATGGGTTCCATGGACCAACAATGTCGTGGCCAGTCCCAGGAACACTCATGATCGAACCCACTGAGAGTGAAAGCAAGGCAGAGTTAGACAGGTTTTGTGATGCTCTTATCTCCATCAGAGAAGAAATTGCGCAGATTGAGAAAGGAAAAGTGGACGCTCACAACAATGTTCTCAAGGGAGCACCTCATCCACCATCACTGCTCATGGCAGACAAATGGACAAAACCATACTCTCGAGAATATGCCGCCTTCCCTGCTTCCTGGCTCCGGTCTGCCAAGTTCTGGCCATCCACTGGACGCGTCGACAATGTGTATGGTGACCGGAACCTCGTCTGCACTCTTCTCCCAGCATCACAGGTGGTTGAGGAACAAAAGGCAGCTTCTGCATAAGTTGAGGCATTACACTGCAAAATCATTGTTCCCTCAACAATATGAAATTCCCTTTTCTTCTTTCTGCTCCTCTTCTTGTGTATAATTTATACTCTTTACATTTACTGTCTTTCATCTTTTTACTATATTGATCATTTGCAGCTCTAATAAAAATTATTGTTGCTAATTGCAACTCTC
>JK987729|Panax ginseng||VF-Pa-G-14-3a-T7_H13 Panax ginseng var. Chunpoong cDNA library Panax ginseng cDNA, mRNA sequence.
GTAAGCTCGAACTGATGAATCAGCAGAAAGGTGGTGACCCACACGATGACTTGCTCACAAGGTTCATGAAGAAAAAAGAATCCTACTCGGACAAATTCTTGCAACACGTGGCACTCAACTTCATCCTAGCTGGACGTGACACGTCATCAGTTGCACTCTGCTGGTTCTTCTGGTTGATCATCCAAAATACAACCGTTGAAGAAAAAGTTGTGCGTGAAATTTGCACCGTTCTGATGGAGACTCGTGGCGATGACGTGTCATCATGGATTGATGAGCCATTAGGATTTGATGAAGTTGACCGCTTGGTATACCTCAAAGCTGCATTGTCAGAAACTCTCCGACTGTACCCGTCGGTGCCGGAGGACTCAAAGCATGTGGTAGCCGACGACGTGCTGCCGGACGGTACATTTGTGCCGGCAGGGTCATCAATCACGTATTCAATATATTCAGCCGGCAGGATGAGATCAACATGGGGCGAGGATTGCCTCGAGTTCCGGCCAGAGAGGTGGTTGTCACCAGATGGCAAGCGTTTCGAAATGCATGACTCGTACAAGTTTGTCTCATTCAATGCCGGCCCAAGAATATGCTTGGGGAAAGATTTGGCGTATTTGCAAATGAAGTCGATAGTGGCGGCAGTGTTGCTCCGGCACCGGCTTACCGTTGTGCCGGAACATAAAATTGAACAAAAGATGTCACTGACATTATTCATGAAGCATGGCTTTAAGGTTAATGTGCATCAAAGGGACTTAACTGGAGTTTTGAGCAGCATTAGGAGAAATGAAGGGTGCTTTGCCGCTAATAAATGTAGCGCGGGTGGTGGTGGGGTAAATATGCCGGTTGGGGTGGTTGGATAATTTATTATGGGCTATAAATCTTCTGAGTCATTATGC
>JK987728|Panax ginseng||VF-Pa-G-14-2a-T7_K14 Panax ginseng var. Chunpoong cDNA library Panax ginseng cDNA, mRNA sequence.
GCTGCAGATTGATCAGTCGTTTCAGATTCACCGTAGTTATGGCAGCATGCTTGAAGGCGAGGCTGACGAACTCAAGAGAGTATTCTTGGAAGGAAATCCTTACATACTGATGATTACCATGGTTGTCTCGTTACTTCATTCTGTATTCGACTTTTTGGCATTCAAGAACGATATTCAGTTTTGGAACAAAAACAAGTCTATGGAAGGACTCTCTGCGAAGTCCGTAATTGTGAACTTCTTTTGTCAGCTGATCGTATTCCTGTACCTACTTGACAATGATACTTCATGGATGATACTTGCAAGTTCTGGGGTTGGTTGCTGCATCGAATTCTGGAAAATTGGGAAAGCCATGCACATCGAGGTTGATAGATCTGGAAATATACCTAGGTTAAGGTTCCGTGACCATGAATCATATGCTGGAAACAAGACAAAGGAGTATGATGATCTTGCGATGAAGTATTTGTCATATGTGCTCTTTCTTCTTGTTGCTGGCTCTTCTGCTTATTCTCTCAAGTATGAACGTCATAAGAGTTGGTACTCTTGGATCCTCTCATCTCTTACAAGCTGTGTCTACATGTTTGGTTTTATTATGATGTGCCCTCAATTGTTCATCAACTATAAGCTGAAGTCTGTTGCCCATCTACCTTGGAGGCAGATGACATACAAGTTTCTTAATACAATTATTGATGATCTCTTTGCCTTTGTGATCAAAATGCCACTACTACATCGGCTTTCTGTCTTCCGTGACGATGTTATATTTCTGATCTATATTTATCAGAGGTGGGTCTATCCAGTTGACAAGAAACGAGTAAATGAATTTGGTTTTGGCGGTGAGGACGAAGATCAGGCCTCTGGCTCTGGGAGCACAGATGTGACTACTGTGAACGAAG
>JK987616|Panax ginseng||VF-Pa-G-13-3a-T7_D11 Panax ginseng var. Chunpoong cDNA library Panax ginseng cDNA, mRNA sequence.
CTCTTGCTTGGAACTAACACCAGCGTAGAATCTCATCAGTGCAGCAGGTGCTTAAGCTTTCTCTTAAACTTCATCTAACACATTATGGGTGATAGTCAGTACTCCTTTTCTCTCACTACTTTCAGCCCTTCTGGGAAGCTTGTTCAGATTGAGCATGCCTTAACAGCAGTAGGATCTGGGCAAACTTCTTTAGGGATCAAAGCTGCCAATGGTGTTGTTATCGCAAAAGAAAAGAAACTTCCATCTATCTTGGTTGATGAAACATCTGTGCAAAAGATTCAGATTTTGACACCAAATATTGGAGTTGTATACAGCGGCATGGGTCCTGATTCTCGAGTTTTAGTACGAAAAAGTAGGAAACAGGCAGAACAATATCATCGACTGTACAAAGAAGCAATCCCTGTTACACAACTTGTAAGGGAAACTGCCGCTGTCATGCAGGAGTTCACACAGTCAGGTGGTGTAAGGCCGTTTGGTGTTTCACTCTTGGTTGCTGGGTTTGATGACAAGGGTCCACAACTGTATCAGGTGGATCCATCAGGTTCATATTTCTCCTGGAAAGCTTCAGCCATGGGGAAAAATGTTTCAAATGCGAAAACATTTCTTGAGAAGAGGTACACAAATGATATGGAACTTGATGATGCTGTACACACTGCTATTTTGACCCTGAAGGAGGGATTTGAAGGACAAATCTCTGGCAAAAACATAGAGATTGGAATTATTGGAACCGACAAACAATTTAGAGTTCTAACTCCTGCTGAAATTGAGGATTACCTGCAGGAAGTGGAGTAATTATTTTCTTGTCAAAGTGATTGGGAAAAACCTCATCTTCCTTTCTACTGGGAAGAACATCAAGATGTCAAATTTGGCTGTAGAATTATGTTG
>JK984894|Panax ginseng||VF-Pa-G-4-2a-T7_O14 Panax ginseng var. Chunpoong cDNA library Panax ginseng cDNA, mRNA sequence.
ACCGGCAGACAGATAGAGATCAACTCTCGTCGAACCTAGTGGAGAAGATGGTCGTAAGCGTCGCCGTCGTCGGCCACCAGAACAATCCGCTATACATACAGAGCTTTACAGAAGCAGATGATGCCCTAAAACTTCATCACATAGTCCACTGCTCCCTTGACGTTGTCGACGAAAGAGTGAACAATCCAAAAAAATCTGGACCAACACTAAATGAGACATTTCTTGGTCTTCTTTATCCAACCGAGAATTACAAAGTGTATGGCTATTTGACCAACACAAAGGTGAAATTTATATTGGTGACAACAGATCTTGATGTCAAGGATGCAGATGTGAGAAATTTTTTCAGGAGGTTCCACTCTGCATATGTTGATGCAGTCTCGAACCCATTTCATGTTCCAGGTAAGAAGATAACCTCCAGAACCTTTGCTGAAAGGGTGAGTACTATTGTTAAATCATTTGGTTCGAGTTCAGCTGGGTGAATGACAACCACTGTCACCTAGTATAATTGGCGGTGCTGTTTGATTTATTTCTCGTATTGTACCTTTAATGAGGGGTTTGAGTTGGGTTGGCAATGGCATGCTGAGAAATTAATTAATCAGGAGGGAACATTGGTTTGTAAGATTTACCATCCCTTTGTAGAACATGAAATTTGTCATGTATTAGATCCAGTGTTTGACGTTGATGTACTAGTAATATTCTTCATCCCCCTTGCC
>JK984826|Panax ginseng||VF-Pa-G-13-2a-T7_E16 Panax ginseng var. Chunpoong cDNA library Panax ginseng cDNA, mRNA sequence.
TGGAGCTCCTCGACAGACTCTGAGAGATGAGGAAGGTAAAAAGCTTGGTTTAAAATCTAACCAGAAGAGCTCCATTTCAGTGGACAACAATGTTAAGACGTCTGAAGCTGAGGGATCATCAAATGGAAGCGGAGAATCATCCAAAGCAACTTCTGAAGGAGGTGTTGTGCCTGCCAAAGAAATGCAGTTGACTGGAATATATGATTTGGTTGCTGTGCTGACTCACAAGGGTAGAAGTGCTGATTCCGGGCATTATGTTGCTTGGGTCAAGCAAGAAAGTGGTAAGTGGATTCAATATGACGACGATAACCCTATCCTGCAACAAGAGGAAGATATCGTAAAACTTTCAGGAGGAGGTGATTGGCATATGGCGTACATTTGCATGTACAAGGCTCGATCTGTTCCTATGTAATATCATTTTTCTTGCGGTCTTCAATGCAGTTTGGATCATCAAAATTGAACTTGATGGTTGCATAGGATGGATATACATTAAGTTGAAACTTTTGCATTTTCAAGGTACTTTCGACACCGAGTATAATTTGATGATGAATAATATCTCAAATTAAAAATTTCCTTTGCTCTTAATTTAGAATTCAGGAGGTGAGTTGACTATAAATGCTCTGAATCTATACCTATATAAGTTTAAAGAATGAATCAATGGGGTCAAAGCAAAATTAGCAACCAGGAAGTAATCATATGCTTTCTTTCT
>JK984783|Panax ginseng||VF-Pa-G-9-2a-T7_E20 Panax ginseng var. Chunpoong cDNA library Panax ginseng cDNA, mRNA sequence.
ATTGAAAGGCTCAATCAATATCTTGAAACGTTCATGGCAGATCATGATGCCTGGAGGGAACTTGCTGAAATATATGTCTCCCTACAAATGTACAAGCAAGCAGCTTTCTGCTACGAGGAGTTAATATTATCTCAACCAATGATTCCTCTCTACCATCTAACTTATGCTGATGTGCTATATACACTAGGTGGACTTGAGAACCTTCAAACAGCTAAGAAATATTATGCGTCCACCATAGAGTTGACTGGTGGTAAGAACACCAGAGCACTCTTTGGCATCTGCTTGTGTTCATCTGCAATCGCACAGCTGACTAAAGGGCGGAACAAGGAGGACAAAGACAGCTCAGAGCTACAATCTCTGGCGGCGACTGTGTTGGGGAAAGACTACAAGGAGAGATCTCCCAGCAATCTCTCTCTGCTTGCTTCCACCTTAAGAAGCTTGAAACTTTCATCCTAACTTTCCTACTATTGGCTGATGCTTCCAATTATTTCATTCCCCACTACTCAAAACTGGATGGGTTTTAGTCAAGTTTTTCAGATTTTTTGAACTTGTTATATTCGTTCAAGTACTTTTATCTTTTCTTCTACCTTTTACAAATGTTAAGATCATGGTGTGATGTAATTCATACTTCCAGTGACAACATATATTTTAGATATTCCTCTGTATTTTTCTTTAAATGTTGCTATGACTCCATTCAACTTTTGTT
>JK984742|Panax ginseng||VF-Pa-G-13-1a-T7_E05 Panax ginseng var. Chunpoong cDNA library Panax ginseng cDNA, mRNA sequence.
CACTCAGCTCTCCGAAATGTCGAAGCGAGGGCGAGGAGGCTCAGCAGGTAATAAGTTCCGGATGTCACTGGGTCTGCCAGTGGCAGCCACAGTGAATTGTGCTGATAATACTGGGGCAAAGAATCTCTATATCATTTCAGTGAAGGGGATTAAGGGTCGGTTGAACAGGTTGCCTTCAGCTTGTGTGGGAGATATGGTGATGGCTACTGTGAAGAAGGGGAAGCCCGATCTTCGTAAGAAGGTGATGCCAGCTGTCATTGTCAGGCAGCGCAAGCCTTGGCGCCGAAAGGATGGAGTTTTCATGTATTTTGAAGACAATGCTGGTGTCATTGTGAATCCAAAGGGAGAAATGAAAGGGTCTGCTATTACGGGCCCAATCGGAAAGGAGTGTGCTGATCTGTGGCCTAGGATTGCTAGTGCAGCTAATGCCATTGTCTAGAGTTCCCTCTTTCTTGACGTTTGAAAAAATTTTACAGATAAATTTTGCTAGCTACAAATTGTTTTTTGTTACCTTTTATCTGAAAAATGGTTCCTCACTATTTAATGGATGTTGATTTAGTAGTTTTCGAACTTGGATGTGCAATAAGTTGTCTGATGTTCACTTCAGTTCATAGTGTTTGCAAGCACTAATATGCTTTTGATTTGAATTTGCAATGCAGTATATTTCCAGTTTAGATTTTAATGTATTGGTGTATTGAGATTC
>JK984679|Panax ginseng||VF-Pa-G-9-3a-T7_J23 Panax ginseng var. Chunpoong cDNA library Panax ginseng cDNA, mRNA sequence.
ATTCATCTTCAAGCGATCTCATACTCTAATGGCGTCTTCAATTGTGGCCAAGGCGGCAGAGAAGACCGGTCCGGCCCTCCGCCGCCAAGCCCTAACAATAACGGACGCCGCCGCCGCTAGGATAAGCCAACTCCTCCAGCTTCGCCAGCGCCCCTTTCTCAAGCTTGGCGTAAAGGCTCGCGGCTGCAACGGCTTATCCTACACCCTTAATTACGCCGATGAAAAAGGGAAATATGATGAGTTGGTCGAGGAAAAGGGTGTGAAGATAATTATTGATCCAAAAGCTCTCATGCATGTCATTGGAACAAAGATGGATTTTGTAGATGACACACTAAGGTCTGAGTTCATATTTATCAACCCCAACTCCAAAGGGCAATGTGGTTGCGGTGAGTCTTTCATGACAACAGGCAGTAAAGGATCTGCTTAGCGAGGTGGTGATTCATAGACATTGGTCACCCCAATCTTTGATGACAACAAGTCCCAGCAAATAAAATCTTTTTTAGACTTTGGGATGGAGTTTTCAGAGCCATTGGTGGCTGCAAGGATATATTCTTTCTAAAGAACCATGCTGACCTAGTCTGCAATTATAGTATTTTAATGTTTGATTGCAATGTTATATACGTGGATGTAATTATTTTGGTTGTAGAAACCCCTTTGCAATCTGTAACATCATCTTAAAACTGGAAGCTATTTTTCACC
>JK984620|Panax ginseng||VF-Pa-G-3-1a-T7_K05 Panax ginseng var. Chunpoong cDNA library Panax ginseng cDNA, mRNA sequence.
TGAGCCCTCGTTTTTAAAAAAATCTAGTAGTTGTTCCCGTGTTCTGCTTACTCCGCTCGATTCCATGGCTGATCCGGAGCTGGAAGCTATCAGGCAAAGAAGAATGCAGGAGCTAATGGCTCAACGAGGCGCTGCAAATCAGCAAAACCCTGAGCAGCAGAATGGCCAGGAGGACGCTAAAAGGGAGGCTGAGGAACGACGACAAATGATGCTTAGTCAGATTGTTTCATCTGAAGCACGAGAAAGACTTGCTCGAATTGCGTTGGTGAAGCCTGAGAAGGCCAGAGGAGTTGAAGATGTTATACTGAGAGCTGCTCAAATGGGACAGATAGTTGAGAAGGTTTCTGAAGAGAGGCTCATATCATTGCTGGAACAAATTAATAACCAAACAACTAAGCAGACCAAAGTCACAATCCAGAGGCGACGGAGTGTTCTTGATGATGATGATTAACTCAGATGGATTCATATTTTATTTTCTAGTGCGTTGTTTGTAATGTATATCGTATGCTTGATTTTGTGGCGTGCAAATTCTTATGGGTATCTAAACTTTATTATCTTTACGTCCTATTTAATTTTTTTTTTTTTGCTGTAATGTCTTCCCTGAGTTGGGCTATTTAGTAGTGTTCATGGTCTTGGACGTCTGCTAGTATGCTACAATGTTTGAGACTGAGTAAAAATTTTCCCTGTTAATTTTC
>JK984456|Panax ginseng||VF-Pa-G-15-1a-T3_G23 Panax ginseng var. Chunpoong cDNA library Panax ginseng cDNA, mRNA sequence.
TGGAAACGCATAAGTAGCGACCTGCACGAATGGTGTAACGACTGCCCCGCTGTCTCCGACATGGACCCGGTGAAATTGAATTCTCCGTGAAGATGCGGAGTACCAACGGCTAGACGGTAAGACCCCGTGCACCTTAACTATAGCTTCGCAGTGACAACCTTGATCGAATGTGTAGGATAGGTGGGAGGTGGTGACACACAACGACCAATCCTGAAAGACCACTCTTTCGTCTAAGGATGCCTAACCGCCGCACCGATCATTCGGGGGGGCGGGACACTGCGAGGTGGGTAGTTTATCTGGGGCGGATGCCTCCTAAAGAGTAACGGAGGTGTGCGAAGGTAGGCTCAAGCTAAGATTCTGCTCGTGAGCGTAATGGTATAAGCCTGCCTGACTGTGAGACCGACTGGTCGAACAGAGACGAAAGTCGGCCATAGTGATCCGGGAGTCCCGTGTGGAAGGGCTCTCGCTCAACGGATCAAAGGTACGCCGGGGATAACAGGCTGATGACTCCTAAGAGCTCTTATCGACGGAGTCGTTTGGCACCTCGATGTCGACTCATCACATCCTGGGGTTGAAGAAGGTCCCAAGGGTTCGGTTGTTCGCCGATTCAAGTGGTACGTGAGTTGGGTTTAGAACGTCGTGAGACAGTTCGGTTCCTATCTACCGTTGGTGTTAAAGGGAGAAC
>JK984454|Panax ginseng||VF-Pa-G-9-3a-T7_H05 Panax ginseng var. Chunpoong cDNA library Panax ginseng cDNA, mRNA sequence.
TAGGGGTAGCCGCTAGGAGCTTTTTCTTCACACTCTCAGTTCCGAAAGCCTGAAATTCTTCTGTTAGATCTCATGGCGCCCAAGAAGGAGAAAGCTCCTCCACCATCGTCCAAGCCCGCTAAATCCGGGGGAGGAAAGCAGAAGAAGAAGAAATGGAGCAAGGGGAAGCAAAAGGAGAAGGTGAACAACATGGTGCTTTTTGACAAGGCAACATATGATAAGCTTCTTTCCGAAGCTCCAAAGTTCAAACTTATAACTCCTTCGATCTTGTCAGACAGATTGAGGATTAATGGATCCCTAGCACGCAAGGCAATCAAGGATTTGATGGCAAGAGGTTCGATTAGGATGATATCTTCTCATTCTAGTCAGCAAATCTATACTAGGGCTACTAATACTTAAGTAGAATGGGCATATTCTTTTTGTAGTATCTATGTAAGGGTGATACTATCTTCTTTTCCTTGGTGGAAGGTGTTTAATGATTTCATTTTATCAGCATTGGCTGAACCTGTTGAGATGGTTATATATATATCTTTTTAATTCCTGGCTTCATATATTTGTATTGAATATGGTATGATATTACTTTTGATTGTCAAAGGTTATTCTACCCCTTCCTACTTTACTTTCTACGACTTGTTCGTGGGTGTTTCTTTTTGCAGTTTTGCTTTAATAAAAGCATCCTTCGAAG
>JK984426|Panax ginseng||VF-Pa-G-9-2a-T7_G08 Panax ginseng var. Chunpoong cDNA library Panax ginseng cDNA, mRNA sequence.
TTTACAATCCCGGTCCATCAGGGTACCCAAACAAATTCCTATTTCCTTCAAAATCTCTCGTCTTCGCAATGGCTTCCAATCTGCTGAAAGCCCTAACGCGATCTTCCAATCTTCCCTCTAATAATTCTTCTTCTTTATCAAAGTCTAGACTTCTCAGCGGAATTGTTAACAGTGAGTTCGTCACTTCTCACACTGCCAAATGGATGCAGGCCACAGACAAAAAATCACCAATGGAGTTGATCAATGAGGTTCCACCAATCAAGGTCGAAGGCAGGATTGTTGCTTGTGAAGGAGACACCAATCCCGCGCTTGGGCATCCAATTGAATTCATATGCCTTGACAAGGATGAGCCGGCTATCTGCAAGTATTGTGGCCTACGGTATGTTCAAGACCATCATCACTAACGGTTTGGTGCCTACCATTATGAGTGCACAAGGTGAATATCATTTTGGAAGTTCAGGGTCTACATGCCCACCTTGTTTAAGCTGTAATTTGCCAATGTCTTGCTGTCTTGGTGTACTTTCATATGTTTCTTTTCAGCTAAAAAAATAAGAATCTTATATCCCAACACATTTGGTGGTTCTAGATTGCCATACTTGGTGGTGTGCCCTTCCATTTGTTATAAGGTGCAAAATTTGTGATTATTTATTGCATGATTTTATTGCTGGTTTTTACTTTCTNA
>JK984421|Panax ginseng||VF-Pa-G-8-2a-T7_M06 Panax ginseng var. Chunpoong cDNA library Panax ginseng cDNA, mRNA sequence.
AGCAGCTCATGCTCTAGGGTGTGATTTGAGAATAGTAAGCGATGCAAATCTGTTTTATATAGAGACAATTCTGAATCATCTTGGATTGAGGGAATATTTCTCTGAAATCAACACCAACCCGGGTTTTGTGGATGAGGAAGGGAAGTTAAGAATCTTCCCTTACGTCGATTTTCATACTTCCCCACATGCCTGCACCAACCTCTGTCCTCCAAATATGTGCAAGGGTCTAATAATTGAAAGGATACAAGCTTCCCTTGCAGAGGAGGGCAATATTAAAAAGATAATCTATGTTGGAGATGGCGTGGGTGATTTTTGCCCAATCTTGAAGCTAAAAGACAGAGACTATGCAATGCCAAGGAAGAATTTCCCGGTTTGGGATTTGATAAGGGAAAACCGTGGTCTGGTAAAGGCGGAAATTCATGAATGGAGTGATGGAGAGGAACTGGAGGGCGTCCTGATTCAACTTATTGCTGCGGAAGAGAGCGACAATACTATATCGGCCCAGTTGTTTTCGGCGGATTGCAAGTTTCAGACAATTGCTCATGAAGCCCTGCCACAAGCTCTCCCTGTTCGTCTTTAGTTTAGTGGACAATAACTTGTTTTCTTAGTGGTTATGGTTTTTCAATGGTTTTGTAATTGAAATTTGTGTTGATCAACAAGAAATTGAAAGCCACTTTTGCGCC
>JK984383|Panax ginseng||VF-Pa-G-2-2a-T7_O20 Panax ginseng var. Chunpoong cDNA library Panax ginseng cDNA, mRNA sequence.
GGTAGCCGCTAGGAGCTTTTTCTTCACACTCTCAGTTCCGAAAGCCTGAAATTCTTCTGTTAGATCTCATGGCGCCCAAGAAGGAGAAAGCTCCTCCACCATCGTCCAAGCCCGCTAAATCCGGGGGAGGAAAGCAGAAGAAGAAGAAATGGAGCAAGGGGAAGCAAAAGGAGAAGGTGAACAACATGGTGCTTTTTGACAAGGCAACATATGATAAGCTTCTTTCCGAAGCTCCAAAGTTCAAACTTATAACTCCTTCGATCTTGTCAGACAGATTGAGGATTAATGGATCCCTAGCACGCAAGGCAATCAAGGATTTGATGGCAAGAGGTTCGATTAGGATGATATCTTCTCATTCTAGTCAGCAAATCTATACTAGGGCTACTAATACTTAAGTAGAATGGGCATATTCTTTTTGTAGTATCTATGTAAGGGTGATACTATCTTCTTTTCCTTGGTGGAAGGTGTTTAATGATTTCATTTTATCAGCATTGGCTGAACCTGTTGAGATGGTTATATATATATCTTTTTAATTCCTGGCTTCATATATTTGTATTGAATATGGTATGATATTACTTTTGATTGTCAAAGGTTATTCTACCCCTTCCTACTTTACTTTCTACGACTTGTTCGTGGGTGTTTCTTTTTGCAGTTTTGCTTTAATAAAAGCATCCTTCGAAG
>JK984295|Panax ginseng||VF-Pa-G-12-4a-T7_H18 Panax ginseng var. Chunpoong cDNA library Panax ginseng cDNA, mRNA sequence.
GAGACGAGGATCTTATCGGGTTAGGGAGGGCAGGGTCGTCCATAGGGTTTAAGCCTATTCTACTTCAAATCAAAGAAGAAGAAAAGTTTGTGTAACAATTTTCGTCCCGTTCCATCTTTCCCAGAGACGTTTAGATATACCTGAGTCCATTCATATCCCCATTTCCCCTGCCAACATTCCGGTCGGATTTTCTCCTATCGCGGTCAAGCATCAGTGACGTATATCAGCTTCTGAGCTTTAGTGGTCTTCACAGAATGTCGGGTGGACCTGGTCTTGAAACCCTTGTAGACCAATTAATTTCAGTTATAACAAATGATGGGCGCAATATAGTGGGAGTTTTAAAAGGTTTTGACCAGGCTACAAATATAATTCTCGATGAATCTCATGAACGCGTTTATTCCACTAAGGAAGGTGTCCAGCAACTCGTGTTAGGTCTTTACATCATCAGGGGTGATAACATAAGCATTGTTGGGGAGGTAGATATAGAACTAGATGAAAGCCTGGAATTGTCAAAATTGAGAGCTCACCCTCTGAAGCCTGTTATCCACTAATGAACTAAATTATATGAACAATTCAAGATGAATGTTGCATGGAAAATCTCTGCTTGAATTTAATTAGAAGTAAAACTACTATTAAGATTGTAAAATAATTGAAGGAACTAAATTTTTTGGAGC
>JK984281|Panax ginseng||VF-Pa-G-2-2a-T7_A04 Panax ginseng var. Chunpoong cDNA library Panax ginseng cDNA, mRNA sequence.
AGAACCCTAAAACCATACCTTTTCATTTCACTTCTCAGTCGCTGAGATAATACACACCGTAACCGTGTGCGTCTGAGAGAGACAATCGGTCCAACATGACGACAAGGTTCAAAAAGAACAGGAAGAAGAGAGGTCACGTGAGCGCCGGCCACGGTCGTATCGGTAAGCACCGTAAGCATCCCGGTGGTCGAGGAAACGCCGGAGGAATGCACCACCACCGGATCTTATTCGACAAGTACCATCCGGGGTATTTCGGGAAAGTGGGAATGAGGTACTTCCACAAGCTCCGCAACAAGTTCTACTGCCCTATCGTTAACATCGACAAGCTCTGGTCGCTCCTTCCTCAGGAGGCAAAAGACAAGGCCGATTCCCAGAATGCCCCCGTGATCGACGTCACTCAGCACGGATACTTCAAGGTTCTTGGTAAGGGTGTTTTGCCGAGTTCTCAGCCGATCGTTGTGAAGGCCAAGCTCGTGTCGAAGACCGCGGAGAAGAAGATCAAAGAATCAGGTGGCGCCGTTGTTCTTACTGCTTAGGTTTGAAGTTTAATTATTAAATTTCTAAGCTTTAAGGTTTTAGAAGTTTTAAGATGTATCTTATTGGACCTTTTTGCAATGCTACAGTTTTTTTTAAATATCTTTTGTTTAATGGTGAAAGGGATATGGTTTACTTG
>JK984248|Panax ginseng||VF-Pa-G-1-3a-T7_J24 Panax ginseng var. Chunpoong cDNA library Panax ginseng cDNA, mRNA sequence.
TAGTTGCACAGTACTCGAATATATGTAAACCCAAACGGTGTCCCAAATTCGTGCCCTAACATTTCCGGTCTGCTTCAAGTTCAGAACAATGGCTTCACTGGACACTGACGTGACTATGGTTCCTGCTGGCGAAGGATCGGGTGGCGCGGGACCTTCTTCTTCCACCGTTTCAACATCATCTTCCACTAGGAAAGCTAAGCGATTTGAGATCAAAAAGTGGAACGCTGTCGCTCTCTGGGCTTGGGATATTGTGGTGGATAATTGTGCTATCTGCAGGAACCATATCATGGATCTCTGTATCGAGTGTCAAGCTAACCAAGCTAGTGCTACAAGCGAGGAGTGCACTGTTGCTTGGGGGGTCTGCAACCATGCCTTCCACTTCCACTGCATCAGCAGATGGCTGAAGACTCGTCAAGTTTGTCCATTGGATAACAGTGAGTGGGAATTTCAGAAATATGGTCACTAGTACCTTTCTGCTGCCAAACAGTTTACTCTAGCGACTATATGTGGGGGATTTGAAGTATTGTTTTATTTACCGTCTTTTAGTTGTCAATATTGAAAACTTTTGTTCAAAAAGCTATCAACAAATATGATGTGTAATGCAGCCGGTATTTAGAACTAGATGATATGCACTGTGTTGAATGATGTTATGAAGTCGATTTGATCTCTCTT
>JK984240|Panax ginseng||VF-Pa-G-11-2a-T7_O04 Panax ginseng var. Chunpoong cDNA library Panax ginseng cDNA, mRNA sequence.
GTCCATCAGGGTACCCAAACAAATTCCTATTTCCTTCAAAATCTCTCGTCTTCGCAATGGCTTCCAATCTGCTGAAAGCCCTAACGCGATCTTCCAATCTTCCCTCTAATAATTCTTCTTCTTTATCAAAGTCTAGACTTCTCAGCGGAATTGTTAACAGTGAGTTCGTCACTTCTCACACTGCCAAATGGATGCAGGCCACAGACAAAAAATCACCAATGGAGTTGATCAATGAGGTTCCACCAATCAAGGTCGAAGGCAGGATTGTTGCTTGTGAAGGAGACACCAATCCCGCGCTTGGGCATCCAATTGAATTCATATGCCTTGACAAGGATGAGCCGGCTATCTGCAAGTATTGTGGCCTACGGTATGTTCAAGACCATCATCACTAACGGTTTGGTGCCTACCATTATGAGTGCACAAGGTGAATATCATTTTGGAAGTTCAGGGTCTACATGCCCACCTTGTTTAAGCTGTAATTTGCCAATGTCTTGCTGTCTTGGTGTACTTTCATATGTTTCTTTTCAGCTAAAAAAATAAGAATCTTATATCCCAACACATTTGGTGGTTCTAGATTGCCATACTTGGTGGTGTGCCCTTCCATTTGTTATAAGGTGCAAAATTTGTGATTATTTATTGCATGATTTTATTGCTGGTTTTTACCTTCTATT
>JK987573|Panax ginseng||VF-Pa-G-12-3a-T7_H23 Panax ginseng var. Chunpoong cDNA library Panax ginseng cDNA, mRNA sequence.
CCCTCCCATTTGTTTTCTTCAGAAAGAGGGGAAAAACAATCCCACGTAAACACTGAAGCTTTTTCAATAGTTTTTGTGTAAAATAAGATGAGAGGAGCGGGTTTCTGGCAACTTGGACAGTCAATCACCCGCCGTCTTGCTCAAGCTGATAAGAAGGCTGTGGCTCGCAGATGCTATGCCAGTGAAGCTGATCTCAAGAAGACAGTTCTGTATGATTTCCATGTTGCCAATGGTGGGAAGATGGTGCCATTTGCTGGTTGGAGTATGCCAATTCAGTACAAGGACTCAATCATGGACTCTACTGTAAACTGTAGGGAGAATGGTAGCCTCTTTGATGTATCACATATGTGTGGGCTAAGTCTCAAGGGGAAGGACAGCATTTCTTTTCTTGAAAAGCTGGTCATCGCGGATGTTGCTGGACTTGCCCCTGGGACCGGGACATTGACCGTCTTCACAAATGAGAAGGGAGGGGCGATTGATGATTCAGTGATCACCAAGGTGACAGATGATCATATATACCTGGTTGTGAATGCTGGGTGCAGAGACAAGGATCTTGCACATATTGAGGAGCATATGAATGCATTCAAAGCCAAAGGTGGGGATGTGTCTTGGCACATCCATGATGAGAGATCTCTTCTAGCCCTCCAGGGTCCTTTGGCAGCTCCAGTTCTTCAGCACCTTACAAAGGAGGATTTGAGCAAGCTATACTTTGGGGAATTTCAGATATTGGATATCAATGGTGCAAAATGCTTTCTCACTAGAACAGGGTATACAGGTGAAGATGGATTCGAGATCTCAGTACCTTCAGAGCATGCTGTGGACCTTGCTAAGGCAATCCTAGAAAAATCTGAAGGCAAAGTAAAGGTTGACGGGGCTGGGTGCT
>JK987518|Panax ginseng||VF-Pa-G-12-1a-T7_A07 Panax ginseng var. Chunpoong cDNA library Panax ginseng cDNA, mRNA sequence.
AGGTGCAGTTGAGGAAGCTGATTCTGGGAAACTTCTGAAAGGCGTGGTGGCTATGGTGGACCTCGCGGTGGATTCCGTGGTGGTCGCCGTGGTGGCTATAGTAATGGAGAAGAGGGAGAAGGGGATCGTGTTCGTAGAGTATTTGAACGTCATAGTGGGACGGGGCGTGGAAATGAATACAAACGTGAAGGATCTGGTCGTGGGAATTGGGGAACTCAGACTGATGAACTTTCTCCGGTGACAGAGGAAGTTGTTAATGAAGGTGAGAAAAATTTGGGTACTGAGAAGCCCTCAGGAGAGGAAGATGCTACAGATGGAAACAAAGAGAAACCAACAAATGAACCTGAAGAAAAGGGGCCAGAGGATAAGGAGATGACACTAGAAGAGTATGAGAAGGTTCTGGAAGAGAAAAGGAAAGCTCTGGAGGCACTTAAAACTGAGGAGAGGAAGGTGGAAATTGACAAAGAGCTTGCGTCCATGCAACAGCTCTCCAGCAAGAAGAGCAATGATGAGATCTTTGTAAAATTGGGCTCTGACAAGGATAAGCGGAAAGAGATTGCTGAGAAGGAGGAAAGAGCCAAGAAGTCTCTCAGTACTAACGAGTTCTTGAAGCCTGCTGAAGGTGAGAAGTACTACGGTCCTGGTGGTCGTGGTCGGGGTCAGGGTCGTGGTTCCAGGCGAGGAGGCCCTGGCAGTGGTAGCGGAGCGAGCACCTATGTTGAAGCCCCGGCCATTGAAGATCCTGGCCAGTTCCCAACCTTGGGTGCCAAGTGAGATCTGCCATTTCCTATGATGCCATCAGTTCTGTTGTTTTTCCTTGTCCTAATCATCCTTAGATCTTCTTGAAGAGTGGCAGGAAAATTTTATCAGAATAATGGATA
>JK987484|Panax ginseng||VF-Pa-G-6-3a-T7_E11 Panax ginseng var. Chunpoong cDNA library Panax ginseng cDNA, mRNA sequence.
GAAGTGAGAATGCTGACATGAGTAACGAGAAATCCTGTGAAAAACACGATCGCCTGCCAGTGGAAGGTTTTCTGCGTTCAGTCAATCTACGCAGAGTGAATCGGTCCCTAAGGAAACCCCGAAAGGGCTGCCGTCCGATGGGTACACGAAAGTGACGAAGTTGCTTTGACTACAGAACCATGCCTGTATGTTGGAGCGAATTGGATGATCGGGCCGAGGGCTGCCCCCTCTTCCCCTCACTCTCCTTTCCCTAATATGAACCTTGAGTCATCAAAGCCTTTCTGACTCGGCCTGGCCCGGTCGCCCTACGCGACTGGCAACTGTTGTCATAGTCAACAAGGTTGAAACTTCCAGGAAAAAACTTCGAATTGGGAGGGCGATCCTCCCGGTGAACTGACCGTACCCCAAACCGACACAGGTGAACAAGTAGAGTATACTAGGGCGCTTGAGAGAACCATGTCGAAGGAACTCGGCAAAATGACCCCGTAACTTCGGGAGAAGGGGTGCTCTCCTATCTTTTGATTAGGAAAGCGGCACATACCAGGGGGTAGCGACTGTTTATTAAAAACACATGACTCCGCTAAGTGGTAACACGATGTATAGAGTCTGACACCTGCCCGGTGCTGGAAGGTCGGAAGGAGAAGTGTTATAAGCTTTGAATGGAAGCCCCGGTAAACGGCGGCAGTAACTCTAACTGTCCTAAGGTAGCGAAATTCCTTGTCGCATAAGTAGCGACCTGCACGAATGGTGTAACGACTGCCCCGCTGTCTCCGACATGGACCCGGTGAAATTGAATTCTCCGTGAAGATGCGGAGTACCAACGGCTAGACGGTAAGACCCCGTGCACCTTAACTATAGCTTCGCAGTGACAACCTTGAT
>JK987416|Panax ginseng||VF-Pa-G-12-2a-T7_G22 Panax ginseng var. Chunpoong cDNA library Panax ginseng cDNA, mRNA sequence.
TGTCTATATGTATATATAGACCCCCCTTTTCTCTTCACACGCACTCTCTACCTATTTCTCTCTCTATCGGACCATTTTCTTCCATCAGAATCCTCATCTCACCTCTCTTTCTCTCTCACGCACAAAAACACACACAGAATCGCACACACATAAACAGCCAGAATGAGCGATCTGAAGACGAGATTTCTGGAGGTGTACTCTGTTCTGAAATCCGAGCTACTCAACGACCCTGCTTTCGAGTTCACCGATGATTCTCGCCAATGGGTCGAGCGGATGCTGGACTATAATGTGCCTGGAGGAAAGCTGAATCGAGGGCTGTCTGTTATTGACAGCTACAAGTTGCTGAAAGAAGGAAAAGAACTAAGTGATGATGAAATTTTTCTTTCAAGTGCACTTGGTTGGTGCATTGAATGGCTTCAAGCTTATTTTCTTGTGCTCGATGATATTATGGATAGCTCTCATACGCGCAGAGGTCAACCCTGTTGGTTCAGATTACCTAAGGTTGGTATGATTGCCGTAAATGATGGCATATTACTTCGCAACCATATCCCAAGGATTCTCAAGAAGCATTTCCGACAAAAGCCTTACTATGTGGATCTGTTGGATCTATTTAATGAGGTAGAATTCCAGACAGCTAGTGGACAGATGATAGATTTGATCACCACCCTTGTAGGAGAGAAAGACTTATCGAAATACTCATTGCCTATTCATCGCCGGATTGTGCAGTACAAAACTGCTTACTACTCATTTTACCTTCCAGTGGCCTGTGCACTTCTTATGTCAGGCGAAGATCTGGAGAAACATACTAATGTAAAGGACATACTTATTGAAATGGGAACCTATTTTCAAGTGCAGGATGATTATCTGGATTGCTTT
>JK987370|Panax ginseng||VF-Pa-G-13-4a-T7_L24 Panax ginseng var. Chunpoong cDNA library Panax ginseng cDNA, mRNA sequence.
GGAGTTTTTCTCTGCTTCTACGTTTCTATTTATCTCTTTCTTTTCATCAAGCTTACCATTAAGCGGTTACCCATTTGTTGATTTCCAGAGATTTTCGCGTCTTTCATCTGAACTCAGTTATGGAGGATGCTAAAGTTATTGCAGCTAAAGATGGAACCATTTCTGTTGCTTCTGCATTTGCTGGTCATCAGGAAGCTGTGCAGGATAGAGACCATAAATTTTTAACAAAAGCTGTTGAGGAAGCCTATAAGGGGGTTGATTTCGGAGATGGAGGCCCTTTTGGTGCAGTTGTTGTTCGCAAGGATGAAGTGGTTGTGAGCTGTCACAACATGGTCCTAAAACACACCGACCCAACGGCACATGCAGAAGTAACAGCAATAAGAGAGGCATGTAAAAAGCTCAATCAAATTGAGCTTGCAGACTGTGAGATATATGCCTCATGCGAGCCTTGTCCCATGTGTTTTGGCGCTATTCATCTGTCAAGAATTAAGAGGTTGGTTTATGGTGCCAAAGCCGAAGCAGCTATTGCCATTGGTTTTGATGACTTTATTGCTGATGCATTAAGGGGTACCGGGTTCTATCAGAAGTCGAATTTGGAGATTAAAAGAGCAGACGGTAATGGGGCGATAATAGCTGAACAAGTTTTCGAGAAAACAAAGGAAAAGTTCACCATGTACTAATTCAAAGTGCCGGCAAGTCAGAAGGCATAGCAACAAGCCCGTGACCTCAATCTTTATTTGAGTACTGCATTTATGTTCTCATGTTATTGAAATAAGTATGTTTAATGTACAACTGTTTATATATCGTTTATTCTTGTAAAACTTGACACGGTTCAATTTGAAGGTGCTTTGTGGCATGATTGCCTTTAACCCTT
>JK987351|Panax ginseng||VF-Pa-G-11-2a-T7_O24 Panax ginseng var. Chunpoong cDNA library Panax ginseng cDNA, mRNA sequence.
GAATCCCTAATATGGCGCCAACAACTTATCCCAAGGACCGGCTCCACATTACCTGCTTCCAAACAGCACCTGATCCTTAAACCCCTATCGTCCCAACGTTCGTAACAGTGAAAAACCCTAACCACGAAAGCGTGGCAATTGCTAGCGGAAACTTCCCGGATTTCAATGACAGACGATCGATCAAAGCTGTTGATCTCAGAAAACCCTTACCATTCGCTTGATCAACGGCCGAATTCGTCCCAACGTCTGATAAAGATCACAAAAGTCAACGAAGAAGAAGAAGAAGAAGAAGAAGATAGAGATTCGCTTGGCAGTGACAGTACGATGAAAAGCCGAAACCCTAGAATTCAAAGGTACTTGGTGGCGGTTGAGTATATTGGGACTCGATTTTATGGGGCACAACAACAAACTACTTGCAGAACTGTCGTTGGTGTTCTTGAGGAAGCTTTCCGTAAATTTATTGGACAGTCAGTATCAATCATTTGCTCAAGCCGAACTGATGCAGGAGTACATGCCTTATCGAATGTTTGTCATGTAGATGTGGAGCGTATAAGCAAAAGGAAGCCTGGTGAAGTGTTACCACCACATGAACCTGCAGTGGTTAAAAAAGCTGTGAACCATTTCTTACAGAAGAATGAAGGTGATATAAGAGTAATTGACGTTCGATGCGTTTCATCCGATTTTCATGCTAGATATAAAGCTCAAGAGCGCACGTACTTCTATCGCTTGCTATCAGATCCTGAGTCTGTGTCTACTTTTGAGAAAGACCGGGCTTGGCATGTGCCTGAGGATCTAGATTTACCAACAATGCAGAAAGCTTGTAAAATTCTTGTTTGCATCATGATTTCAGTTCCTTCAGGGCAGCAGGTTGTC
>JK987295|Panax ginseng||VF-Pa-G-15-2a-T3_G22 Panax ginseng var. Chunpoong cDNA library Panax ginseng cDNA, mRNA sequence.
TACCCAAAAAGAAAAACGGTAAGACAAAAGCTAAATAATACAGATTATCCGTACAAAACAATCAATCGAAGCAGCATCAATCGATGGCTGATGCTTACTGCTCCGACTGCAAGAAAAATACCGAAGTTGTTTTCGATCACTCAGCCGGAGACACCGTTTGCTCCGAATGTGGACTTGTTCTGGAGTCTCACTCCATTGACGAGACCTCCGAGTGGCGTACTTTCGCCAACGAGTCCGGTGACAACGACCCCGTCCGTGTCGGTGGTCCCACCAACCCTCTTCTCACAGACGGCGGCCTTTCCACCGTCATATCCAAACCCAACGGCGTCACCAGTGATTTCTTGTCTTCGTCCCTGGGTCGCTGGCAGAATCGCGGTTCGAACCCGGATCGGTCTCTCATATTGGCCTTCAAGACCATAGCCACCATGTCCGACAGGTTGGGCCTTGTTGCAACCATTAAGGATCGTGCTAATGAGATATACAAGAAGGTAGAAGATCAAAAGTCTAGTAGAGGAAGAAACCAGGATGCAATATTGGCTGCTTGCCTGTACATTGCTTGTCGACAAGAAGACAAGCCGCGGACTGTTAAGGAAATTTGCTCCGTTGCCAATGGAGCGACAAAGAAGGAAATTGGCCGAGCAAAAGAATACATAGTGAAACAACTAGAGCTTGAGATGGGTCAGTCAGTGGAGATGGGTACTATACATGCTGGGGATTTTATGAGGCGCTTTTGTTCAAATCTTGGTATGACAAATCAAACAGTCAAAGCTGCCCAAGAAGCAGTCCAAAAGTCGGAAGAATTTGATATAAGGAGGAGTCCTATATCTATTGCCGCAGCAGTTATCTATATTGTAACTCAGCTTTCTGATGA
>JK987252|Panax ginseng||VF-Pa-G-12-4a-T7_B24 Panax ginseng var. Chunpoong cDNA library Panax ginseng cDNA, mRNA sequence.
GCAATACGATTATCAGTTCCTCCTCTCACTAAACACCTCAATTGGTCCTCATGTTGCGCTCTACGCTCAATCTGGGGTTAGGTTCGAATTGGGTGTAGTTCAATCTCCCACTGAATTCAATCAAAAAGGCTTTTTTAGCTTACACTGCATACTAAATTTATCTTGGGGAAGTTGTTTGAATATGATTCTGAATGGATGCTCCTTGAAGTCTGGAGGAGTTTGTTCAATGGCTCCCAAGTCTTATTACTCAGCTCCTGGATGCTTAACTCGTGTGCCTGTTAAGGTTGCATCCCCAAGCATTAGGAGCTCATGGGAGCCTAATCGAAAGCTGAAGTTTGGCTCTTTCAAAGGTATTCAATCTCGTTGTCTTTCTGCTGGGTCATCGCCACTACTAAATGGGGATCTTTGTGGCTTGTCACATGCCATCTCCAGGATACCTACGCGGCGTAGAAGTGTTATTTCTCCTAGAGCTGCCAAGGATGTCCCCTCTAGTTATAGGTACCCAGCCATGACCAAGAAGCCACAATGGTGGTGGAGATCTTTGGCGTGCCTCCCTTATCTAATGCCCCTTCACGAGACATGGATGTATGCTGAGACTGCCTATCATCTGCATCCGTTCTTGGAGGAATTTGAGTTTTTGACTTATCCTTTTTTGGAAGTTATTGGGAAACTGCCAAGCTGGTTTTTAATTGCATATTTCTTAGTTGCTTATCTTGGAATAGTGAGAAGAAAGGAATGGCCGCATTTTTTTAGGTTTCATGTCGTGATGGGGATGCTGCTGGAGATTTCACTGCAGGTGATAGGGACTATCAGTCGTCGTTGGTTGCCTCGTGCTGTATATTGGGGTAAGGTTGGTATGCATTTTTGG
>JK987217|Panax ginseng||VF-Pa-G-8-2a-T7_O20 Panax ginseng var. Chunpoong cDNA library Panax ginseng cDNA, mRNA sequence.
GTTTTTCTCTGCTTCTACGTTTCTATTTATCTATTTCTTTTCATCAAGCTTACCATTAAGCGGTTACACATTTGTTGATTTCCAGAGATTTTCGCGTCTTTCATCTGAACTCAGTTATGGAGGATGCTAATGTTATTGCAGCTAAAGATGGAACCATTTCTGTTGCTTCTGCATTTGCTGGTCATCAGGAAGCTGTGCAGGATAGAGACCATAAATTTTTAACAAAAGCTGTTGAGGAAGCCTATAAGGGGGTTGATTGCGGAGATGGAGGCCCTTTTGGTGCAGTTGTTGTTCGCAAGGATGAAGTGGTTGTGAGCTGTCACAACATGGTCCTAAAACACACCGACCCAACGGCACATGCAGAAGTAACAGCAATAAGAGAGGCATGTAAAAAGCTCAATCAAATTGAGCTTGCAGACTGTGAGATATATGCCTCATGCGAGCCTTGTCCCATGTGTTTTGGCGCTATTCATCTGTCAAGAATTAAGAGGTTGGTTTATGGTGCCAAAGCCGAAGCAGCTATTGCCATTGGTTTTGATGACTTTATTGCTGATGCATTAAGGGGTACCGGGTTCTATCAGAAGTCGAATTTGGAGATTAAAAGAGCAGATGGTAATGGGGCGATAATCGCTGAACAAGTTTTCGAGAAAACAAAGGAAAAGTTCACCATGTACTAATTCAAAGTGCCGGCAAGTCAGAAGGCATAGCAACAATCCCGTGACCTCAATCTTTATTTGACTATTGCATTTATGTTCTCATGTTATTGAAATAAGTATGTTTAATGTACATCTGTTTATATATCGTTTATTCTTGTAAAACTTGACACAGTTCAATTTGAAGGTGCTTTTTGGCATGATTGCCTTTTT
>JK987178|Panax ginseng||VF-Pa-G-4-4a-T7_P10 Panax ginseng var. Chunpoong cDNA library Panax ginseng cDNA, mRNA sequence.
GCATAGGATTATCCTATTTATTAATAGTGGGCCGGCAAATTGAGGATCAAGTTAAGTGACAGATTTATTACCATTCCTTCTTTCACGTGATCAATACCGGCAGACAGATAGAGATCAACTTCGTCGAACCAAGTGGAGAAGATGATCGTATGCGTCGCCGTCGTCGGCCACCAGAACAATCCGCTATACATACAGAGCTTTACAGAAGCAGATGATGCCCTAAAACTTCATCACATAGTCCACTGCTCCCTTGACGTTGTCGACGAAAGAGTGAACAATCCAAAAAAATCTGGACCAACACTAAATGAGACATTTCTTGGTCTTCTTTATCCAACCGAGAATTACAAAGTGTATGGCTATTTGACCAACACAAAGGTGAAATTTATATTGGTGACAACAGATCTTGATGTCAAGGATGCAGATGTGAGAAATTTTTTCAGAAGGTTCCACTCTGCATATGTTGATGCAGTCTCGAACCCATTTCATGTTCCAGGTAAGAAGATAACCTCCAGAACCTTTGCTGAAAGGGTGAGTACTATTGTTAAATCATTTGGTTCGAGTTCAGCTGGGTGAATGACAACCACTGTCACCTAGTATAATTGGCGGTGCTGTTTGATTTATTTCTCGTATTGTACCTTTAATGAGGGGTTTGAGTTGGGTTGGCAATGGCATGCTGAGAAATAATTAATCAGGAGGGAACATTGGTTTGTAAGATTTACCATCCCTTTGTAGAACATGAAATTTGTCATGTATTAGATCCAGTGTTTGACGTTGATGTACTAGTAATATTCTTCATCCCCCTTGCCTGTTGCAGAGTAGTACATTATATTAACATTTCATTTTCACAACGTTGATATCTTCCAT
>JK987131|Panax ginseng||VF-Pa-G-11-4a-T7_H20 Panax ginseng var. Chunpoong cDNA library Panax ginseng cDNA, mRNA sequence.
TCCTTTATTTAGCTCTCACAAAACCCTAATCTTTAGCAAAAATGTCTTCTTCCTCCGATCATCTCAATTCTGTCTTCTCTAATGTTGCTCGTGCTCCTGAAGATCCTATCTTAGGGGTCAATGTTGCTTACAACAAAGATCCAAGCCCTATAAAGTTGAATCTAGGTGTTGGTGCTTATCGAACTGAGGAAGGAAAACCTCTTGTTCTTAATGTGGTGAGAAGAGCAGAGCAGATGCTTGTGAATGATCAGTCTCGAACTAAAGAGTATATTCCAATTGTTGGGCTGGCTGATTTTAATAAATTGAGTGCCAAGCTCATTTTTGGTGCTGATAGCCCCGCTATTCAAGAAAACAGAGTCACTACAGTCCAGTGCTTATCTGGAACTGGCTCACTGAGGGTTGGAGGTGAATTCCTGACAAGACATTATCATGAACACACAATATATATTCCACTGCCAACTTGGGGAAACCATACAAAAATTTTCAATTTAGCAGGGTTGTCAGTGAAGACTTATCGCTACTATAACCCCGGAACGCGTGGACTGGACTTCCAAGGAATGCTGGAGGATCTTGGCACTGCCCCATCAGGAGCAATAGTGCTTCTTCATGCGTGCGCTCACAATCCAACAGGTGTTGATCCAACCCTTGAGCAGTGGGAGCAGATCAGACAGCTAATGAGATCAAAAAGCTTGTTACCCTTTTTCGATAGTGCATATCAGGGTTTTGCTAGTGGCAGCCTTGATAAAGATGCAAAGTCTGTTCGCATGTTTGTTGCAGATGGTGGTGAATGCCTTGCAGCTCAGAGTTATGCAAAAAACATGGGACTCTATGGGGAACGTGTTGGTGCCCTCAGCATTGTTTG
>JK987070|Panax ginseng||VF-Pa-G-14-3a-T7_P05 Panax ginseng var. Chunpoong cDNA library Panax ginseng cDNA, mRNA sequence.
AGGGTGGGTTTTTGGTTGGTGATGGAACGGAAGAGAGAAGCGCCGGAGATCGAGGGATTACCGATTGACATATTGGCTCACATCTTTTTATTCCTTTCTTGCTTCAAAGATTTGGCTCACGCAAGCAGTGTATGCAAGAAATGGAAGGAAGGGGTGAAGCAATCGTTGGGTCGGAGAGAGGCGCTGAGCTTTGCTGGTTGGAAAATGGACGATGACTCCACTGCTCGCCTCCTTGTTCACGCTTACTCCCTCAAAGAACTCGACATATCAAAGAGCAGGTGGGGTTGTCATGTAACAGATAATGGACTCTACCAAATATCTTTAGCAAAATGTGTTACCAATCTGTCCTCAATATCCTTATGGGGTATGACGGGAATATCTGACGAAGGTGTTGTTCAACTGGTATCAAGAGCAACTTCTTTGCAACACCTCAATATTGGGGGTACATTTATAACAGATGAATCTTTGTTTGCTATTGCAAACAGTTGTAAGCATTTGAAGTCTATCAACCTGTGGTGCTGCCGTCACGTGACTGAGAGTGGACTTCTGGTTCTTGTAAATAAGTGTCACAAACTTGAATCAATCAATGTATGGGGTATGAGGGTTCCTCTCAACTGCTTCATTGGTTTGGTCAACATCAGTCCAGCTCTTCACATACAACCTGAAGGCTTGTTGCCAATTGTTGAAAGTGTATCTACGTGGCCTGTCTTTTGAGAAATTATAATGGTTCTGCGGTTGCCAATAAGAACGGATTGTTTCTTATTGTGTGCGCATATTTTATATTATAGAGTGTATAGGTAATTCTGTGTATTTATCAATAACCACTCGGTATGTATGGACTACAGACTTGAACCTGGC
>JK987002|Panax ginseng||VF-Pa-G-12-2a-T7_G08 Panax ginseng var. Chunpoong cDNA library Panax ginseng cDNA, mRNA sequence.
GGGTGAGCCTCTAGACACGAAGGTGTGTTTATTGCTAAGGGAAAAGAAGATGCTCTTTGTACTAAGAACATGGTTCCTGGTGAAGCTGTGTACAATGAGAAGAGGGTATCCGTTCAGAATGAAGATGGAACTAAGGTTGAGTACAGGGTATGGAATCCCTTCCGTTCTAAGTTGGCGGCTGCCATTCTTGGAGGAGTTGACAACATCTGGATAAAACCTGGTGCTCGGGTTCTGTATCTTGGAGCTGCTTCTGGAACAACCGTCTCTCATGTGTCTGATCTTGTTGGCCCTTCTGGAGTAGTCTATGCCGTTGAATTTTCTCACAGAAGTGGTAGGGACTTGGTTAACATGGCAAAGAAGCGAACTAATGTTATACCTATTATTGAGGATGCTAGGCATCCAGCCAAGTACCGTATGCTTGTTGGGATGGTTGATGTGATATTTTCTGATGTTGCTCAGCCTGATCAGGCAAGAATTTTGGCTTTGAATGCATCGTACTTCTTGAAAGCTGGAGGTCATTTTGTTATATCAATCAAGGCAAACTGCATAGACTCGACTGTTCCGGCTGAGGCCGTCTTTGCTCAGGAAGTGAAGAAACTACAAGCAGATCAATTCAAGCCTAGTGAGCAGGTCACCCTTGAACCCTTTGAGAGAGACCATGCATGTGTTGTTGGTGCATACCGTGTGCCAAAGAAACAAAAAGCTGCTGCTGCCTAGATAGTGTTGGCTCTTAGTTATTTGGAATATCAGTCTATCTATTATTATGTTGAAGTCTTTTCATCTTCAGTTTCTTTTGTTTGTAGGGGATATTTTGACAAGGTTTTGCTGAATTGAGAATGTGAGGCCAGATTTTCT
>JK986963|Panax ginseng||VF-Pa-G-8-3a-T7_N17 Panax ginseng var. Chunpoong cDNA library Panax ginseng cDNA, mRNA sequence.
CACATGCTGTCTCCGTCGCATATTATCCCATTCTACCAGGCATTTAATGGGAAGAAGTGGGAGAAGTTCAACAGTGAGAAAGTTGCTTCCTTGGCATATGCTCGAATCCAGGGAAAGTTGGCCCTTGTCACCCACTTCCAGAATTCAAGTTTGATGAACGAAGATAAGCGCTGCAGGCCTATTCTGTTTCATTCCGAGGGCTCAGAGGCTGGTGATCAGGTCATCCAGGAACCTCTTCCTTCAAATAGTTTGAACATCCAAACCAGTCAGTCAAATAGGCCAGGGTCAGACTTGGGAGATTCTCTTGGAAGCACTACAAAGGATAGTGCAGGTGAGGTTAGTTCTTCTCTACTAGAGAAGAGCTAACAGTGGCACGGAGGCAGTTAGCATATAGCCCCCATTGGTTTTCTGCAGCTGCTATCCGTTTGTATATCTATGTATAAAATAGGAGGTGCACCAGGTACTGGCTGCAGATTTTGTATATGAAAAGCCTTGAAAGAGAAAAACAAGAGCATCTTTTTGATTGATGTGCGGATGATGATTTTGGTTTGACATAAAGGGGAATTAACTTGAAGATCACCCATACATGGATTATGGTCTCCTACCCTCAAGCTCAGGAGTCTCGAGTCTCGACATTGAAGTCATACTTTTTTGGTAGTTGAGATTGGTTAATGGATCGTTAAGTATGTTGTTTATATAGTATCTGGGTAAATGTGTTTGAAATGTTGAAATTTTGGGTTTGTGATTTAGAATTGGGGCTGTTTACAAATTGTATATTTGTATTGTGGGGAAGACTGACCTGACTGGCTCTTGTGAATCTTATTCAGTACTTCTAACTTAAATTGACATGTTT
>JK986938|Panax ginseng||VF-Pa-G-13-4a-T7_N22 Panax ginseng var. Chunpoong cDNA library Panax ginseng cDNA, mRNA sequence.
TGGTTTGTTGGCGAACGAAGGGCTAAATAGCGCCAGTGATTCTCTGAACCGGTCTGGATTTCCAACGCCTCAGGAAACTGGTCGAGATAGATGACAGCACCCTTTTCTCCTCTTCCTTACCGGGAGGGCAATCTTCTCTTATGGCCCTCACCTCCCGTCCGGCCCGGAAATCGAGAACCCCCTCTGATCCATTCATTTCCGCAAGCAGGGAGGATCCAGAGCTAAGCCCCCGCCTATTCGAGGCCGGGTGGCCTCGCCCCACAAGCACCCAACCTTCCTTTTGCTCTTCCTTCGGGTTGCCTCCACGAACGCGCCACCTAGGAGCCCTACTCATATTCCAAAGGCGACCTGCTTTCAATACTAGTTGTTACCTTACGCCGACATTTTTCCAAAATTCTTGAATAGCATGGCCTGGGGCTAAGATAACTCAAGTGGGAGAGCCGTGTTATGGGTGACCTTATTGCACGGTTCAGAGAGCACTTGTGTATGTGATGCAAGTGAACGTGTACGAAAAAGCTGTCGTAAAGTTTCGTTGTTCGTTCCGTCGTTGACCCTATCTATGTTTCTATGATGGCCCAAGAACACGCTTATTCTTTAGCCGTAGAGAGACTTTTGAATTGCGAGGTACCATTACGAGCTCAATATATACGAGTGTTATTCTGTGAAATAACTCGAATTTTAAATCATTTACTTGCTTTAACTACTCATGCTATGGATGTGGGAGCATTAACTCCGTTCCTGTGGGCTTTTGAGGAGCGGGAGAAATTGTTGGAATTCTATGAAAGAGTCTCGGGAGCCAGGATGCATGCCAGTTTCATACGACCAGGTGGAGTGGCACAAGATCTGCCTCT
>JK986913|Panax ginseng||VF-Pa-G-1-3a-T7_L16 Panax ginseng var. Chunpoong cDNA library Panax ginseng cDNA, mRNA sequence.
TGTTTGTGAAATTGAATCTCTCTCCGCAATTAACCAGAACGAGAAGTAGCAATTCGAACAAAAATGAAGAATTTGATGGCGAAGTACCTGATAATAGCTCTGCTATTGGTGTTATCGAGCCTAGTGAGCTGCGGTGAAGGTCCTTTCATAGTGGCGCACAAGAAAGCCACTCTCAACAGGCTCAAATCCGGCGCCGAGCGAATTTCCGTCTCCATCGATATCTACAATCAAGGATCTGCGACTGCATATGACGTTAGTCTAACTGATGATAGCTGGTCCAGAGAATATTTTGATATCATCAGTGGTAACATTTCGACGTCGTGGGAAAAGCTTGATTCCGGTGCTCTTCTATCACACTCTTTTGAATTGGAATCCAAAGTAAAAACACTATTTTATGGTGCACCGGCAGTTATTAAATTCCGCATCCCTACAAAAGCTGCTCTACAGGAGGCATATTCAACTCCACTTCTGCCTCTAGACCTCCTAGCTGATAGGGCTCCTGAGAAGAAGTTTGACTGGGCTAAGAGGTTGTTGGGAAAGTACGGGTCATTGATTTCTGTGATCTCAATCGTGGTATTGTTCATCTACTTGGTTGCAACCCCATCTAAATCTAGTGCTGCAAAGGGAGGCAAAAAGAAGCGTTAGCTATTAGATTGTAAAACATTTGCTGGTCTACAATCAGATTTTCTTGAAGAAAGAATGTGGCTTCTGTTCCCCCCAAGCTGCCCCTCCCCCAAAAGAAAATATACTTTTTTTATTTGCTAGCGAAGTTGTACCTCTTTATTTCTAAGGTGGTTCCAAAATGTACTAAAAGATAGTCTCATAATAGTTGCAGGTAATGTTGCACGAC
>JK986780|Panax ginseng||VF-Pa-G-5-3a-T7_H15 Panax ginseng var. Chunpoong cDNA library Panax ginseng cDNA, mRNA sequence.
GTTCGTGTGGTGGATGTGTTTGCGATGCCCAGAGTGGTACTGGTGTTAGTGTTGAAGCTGTCGATCATGTTTTTCAGACTAATATGCTGGATATGCTGAAGCAAACGGGGAGGCCCGAGATGGTTGTTGGATGGTACCATTCGCATCCTGGATTTGGCTGTTGGCTTTCTGGTGTAGACATCAATACTCAGCAGAGTTTTGAAGCTCTGAATCAAAGAGCTGTGGCAGTGGTGGTGGATCCAATTCAGAGTGTTAAAGGGAAGGTGGTGATTGATGCCTTTCGATTAATCAACCCACAAACTATGATGCTTGGTCAAGAGCCAAGGCAGACAACATCCAATCTTGGGCATCTCAATAAACCATCTATTCAAGCACTAATCCATGGATTGAACAGGCATTATTACTCGATAGCTATAAATTACAGGAAGAATGAACTTGAGGAGAAGATGTTATTGAACCTTCACAAGAAGAAATGGACTGATGGATTGACACTTCAGCGGTTCGATACACATTCCAAAACTAACGAGCAGACGGTTCAGGAAATGCTAAACCTAGCCATCAAATACAACAAAGCCGTTCAAGAGGAGGATGAGTTGCCACCAGAAAAGCTAGCAATTGCTAATGTGGGAAGGCAAGATGCAAAGAAGCATCTTGAGGAGCATGTCTCCAACTTGATGTCTTCAAACATAATTCAAACCTTGGGTACCATGCTTGACACTGTCGTCTTCTAGAGTTCATTGTGTTGGAGACTGAAGCAATATTATTATGTTGTAGTCACGACTTTTTCCTGTTATCTCTACTATGTACAACAATTAGAAAACTGAATCGTGTTTTATTTACCTA
>JK986757|Panax ginseng||VF-Pa-G-9-1a-T7_A05 Panax ginseng var. Chunpoong cDNA library Panax ginseng cDNA, mRNA sequence.
TGAATCGAAACCTGAAACAAAGGGGAAAATGGTGTCACTGAAACTGCAGAAAAGGCTCGCAGCGAGCGTTCTCAAATGCGGTAGAGGCAAGGTCTGGCTCGACCCCAACGAGGGCAATGAAATCTCCATGGCCAACTCCAGGCAGAACATAAGAAAATTGGTTAAGGATGGTTTCATCATCAGGAAACCAACCAAGATTCACTCGCGATCTCGTGCTAGGAGAATGAAAGAGGCCAAGAGAAAGGGACGCCATGCTGGATACGGTAAACGCAAGGGTACTAGGGAGGCAAGATTGCCAACAAAAATCCTTTGGATGAGGAGAATGCGTGTGCTAAGGCGCTTGCTCCGCAAATACAGGGAAGCAAAGAAAATTGACAAGCACATGTACCATGACATGTACATGAAGGTTAAAGGAAATGTATACAAGAACAAGCGTGTGCTGATGGAAAGTATCCATAAGACAAAGACTGAAAAGGCAAGAGAAAAAACACTTTCCGACCAGTTTGAGGCTAAGCGGGCTAAGAATAAGGCCAGCAGAGAAAGGAAGATAGCTCGGAGGGAGGAGCGTTTGGCTCAGGGACCTGGAGCACAAGCACCTCCATCTGTACCTGCAGTTGCCCCTCAACCAACAGAGAAATCTAAGAAAGCTAAGAAGTGAAGTGAAGCCTGGAATGTTTCCTAAGCTATCATGTGGCCAGTTTATTTGTTTACAAGAATTGACATATTCAAACCGTATAATTTGTTCTTCCATTTACTATTTGTGGAGTAATGCATTTGTTTATGGTGATGGCTTTTTGTTGAATTATGTGTGTTGGTTGGAAATGAATAATGGCAGTTTGATG
>JK986717|Panax ginseng||VF-Pa-G-3-2a-T7_O22 Panax ginseng var. Chunpoong cDNA library Panax ginseng cDNA, mRNA sequence.
TGATGTATTGACCCCAAAGGTCTTCATTGGTTTGCTCGTTGGTGCCATGCTTCCTTACTGGTTCTCTGCCATGACCATGAAGAGTGTGGGTAGTGCAGCTCTGAAGATGGTTGAGGAAGTTCGCAGACAGTTCAACACCATACCTGGTATCATGGAGGGCACTGCCAAGCCTGATTATGCCACATGTGTCAAGATCTCAACTGATGCTTCTATCAAGGAGATGATTCCCCCTGGTGCCCTGGTGATGCTTACACCTCTCATTGTTGGAATCCTTTTTGGAGTGGAGACTCTGTCTGGCGTTCTTGCTGGCTCTCTTGTTTCAGGTGTCCAGATAGCAATATCTGCATCGAACACTGGTGGTGCCTGGGACAATGCGAAGAAATATATCGAGGCTGGTGCCTCTGAGCATGCCAGGACCCTTGGACCAAAGGGATCTGATCCACACAAGGCAGCTGTGATTGGTGATACCATTGGAGATCCACTAAAGGACACTTCAGGCCCATCACTGAATATCCTTATCAAGCTCATGGCCGTTGAATCCCTTGTATTTGCCCCTTTCTTTGCCACTCACGGGGGCCTGCTTTTTAAGATCTTTTAAGGGAGAAATGACCAGGGAAACACACGAATTGACCTCTTTTCCCCCTCTATAGTACTAGCATTTCTAATCGTCTATTCCATAGCTTTCACCAACAATTTTCTTTGCATCTGTTCACTTCCCAAGCAGGAAAGTTTGAAGTTAGTTTGTAGTTGGTTAATATTATTTTTGATGATCCAATGATGATGATAATTGTGATGGCAAGAAAGGATGATGAAAATTGTCACTCCTATCACAGAGGAGA
>JK986655|Panax ginseng||VF-Pa-G-1-4a-T7_C09 Panax ginseng var. Chunpoong cDNA library Panax ginseng cDNA, mRNA sequence.
TGTGTCAATTGAGGATCCATTTGACCAAGATGACTGGGAGCACTATGGTAAGATGACAGCTGAAATTGGTGAAAAAGTGCAGATTGTGGGAGATGATCTGCTGGTCACCAATCCCAAGAGAGTTGAGAAGGCAATCAAAGAGAAAACTTGCAATGCTCTTCTACTTAAGGTTAACCAAATTGGATCTGTTACTGAGAGTATAGGAGCTGTAAAAATGTCGAAGCGGGCTGGTTGGGGTGTAATGGCTAGTCACCGCAGTGGAGAGACAGAGGACACTTTCATCGCTGATCTGTCCGTGGGTTTGTCAACGGGCCAAATCAAGACTGGAGCACCATGTAGGTCAGAGCGTCTTGCCAAGTACAATCAGATTTTGCGAATTGAAGAGGAGCTAGGTTCTGAAGCAGTTTATGCAGGAGCTAACTTCCGCATGCCTGTTGAGCCCTACTAGAGTTCGGGAGTTGGGCATCAAAGATGGTTGGTTGTGGCGGAGTTGCACTTTGCAGAGAATAATTTTATATGTAAACTGGGTCATGTTTAATCTACCTAGGGAGATCAAAGACCCTTTTTGAAATAATTGTAGCTCAAGTTTTTGTTCGGAGGTTGAAACATTGTTAAACCAAGTTAACTTTTTGAAGACTTGAGGAGCATATTTTTGCTAGTTAGTCTTCTCAAATTTTGAAATAATTTGCAATTTGGTTGTGCAAGGCTGGTATCCTCTTGAGAGAGATTGGCTTTTGATATTGCAATGTAGCGACCCTTGTGAGATTTTGCTATTAGTGTTAATTTGTAATGGTTTTCAATATACTGTAATATTTTACATGAAAAAGGCTGGTT
>JK986614|Panax ginseng||VF-Pa-G-15-3a-T3_L09 Panax ginseng var. Chunpoong cDNA library Panax ginseng cDNA, mRNA sequence.
CCTTGGAGATGTCGTCTCTGAAGCTGATATCTTTGTCACCACCACTGGTAACAAGGACATCATCATGGTTGACCACATGAGGAAGATGAAGAACAATGCCATTGTTTGCAACATTGGTCACTTTGACAATGAAATTGACATGCTTGGTCTTGAGACATTCCCGGGTGTGAAGAGAATTACCATCAAACCCCAAACCGACGGGTGGGTCTTCCCCGACACCCAATCGGGCATCATTGTTTTAGCTGAGGGACGTCTGATGAACTTGGGTTGCGCCACTGGTCACCCCAGCTTTGTGATGTCTTGCTCGTTCACGAACCAAGTGATTGCCCAGCTTGAGTTGTGGAAGGAAAGGAGCACCGGGAAGTACGAAAAGAAGGTGTACGTCTTGCCCAAGCACCTTGACGAGAAGGTAGCAGCTCTTCATCTTGGAAAACTTGGTGCTAAGCTCACTAAGCTCAGCAAGGACCAGGCTGATTACATTAGTGTACCAGTTGAGGGACCATACAAGCCTGTTCATTACAGGTACTGAGAAGGAAATGATTGTGAGAAATTGAGAAAAACAGGAAATGTTGAAACGGCTTTGATTGTTTAATTTTAGTACTTTTGCTTATGTTTAGAACACTAGTAGTTGTGAGTTTTATGGGGGTAGGAAAGTGAGGAGGGAGAAAATGGATTGATCTCTGTTGAAGTAGACCATGTTGGGTTTGAATAAGGTGGTTTTTGGGGAGGTGTGGGCAGAAATATTGTAGTTGATCATGTTTTTTACTCATTTGGTTTTCAGTATTGATGGAAAAAAATGTTTTTTTTTTAGTAATATTGTAGTTCCACGGT
>JK984008|Panax ginseng||VF-Pa-G-10-1a-T7_G05 Panax ginseng var. Chunpoong cDNA library Panax ginseng cDNA, mRNA sequence.
AACCCTAAACAAGTGTTTGTTTCGGCCCTCTTCGTCACTTCTCAGGCGCCATTTCTTCTTACAGCTTGATTTGTGAGGATGGTGAGGGTAAGTGTCCTAAATGATGCTCTCAAGAGCATGTACAATGCTGAAAAGAGGGGAAAACGACAAGTCATGATTAGGCCCTCATCAAAAGTGATCATCAAGTTTCTTCTGGTCATGCAGAAGCATGGTTACATAGGAGAGTTCGAGTATGTTGATGACCACAGATCTGGAAAAATTGTGGTTGAATTGAATGGCAGGCTGAACAAATGTGGGGTCATTAGTCCTCGTTTTGATGTTGGTGTCAAAGAAATTGAGCCATGGACTGCAAGACTGCTTCCCTCAAGACAGTTTGGGTACATTGTACTGACTACATCTGCTGGCATCATGGATCATGAAGAAGCAAGGAGAAAGAATGTTGGTGGTAAAGTACTTGGCTTCTTTTACTAAGCAGAGATTTTGGAGGATTATTTTGGTCATTTAGCCTAGTGTTTCTTTCCCTCCTTTTTCTTTTACCTTTTCCTATGAAGATTAATGTTTCTATGTTGGAATATTATGTTTGAGATTATTTCTAGTCTTTGGTTTGAATTTTTTCTACTATGAAATGACATTTTGAGATGTTCTGTTTGAAT
>JK984002|Panax ginseng||VF-Pa-G-3-1a-T7_G13 Panax ginseng var. Chunpoong cDNA library Panax ginseng cDNA, mRNA sequence.
GGGGTTCAGCAAAAATTTGAGAGAGAGGCAGCGCTCCCAATATCTGCAGGTTTTGTACTTTCACGTCCTGTTGAAGCTTCTTCGTTCGAGTAAAGATGAGTCGCCCAATGGACGAAGATGTCCCTACGAAGAATGAAGAGGAGGAGTTTAACACAGGGCCACTTTCTATGTTGATGATGAGTGTAAAAAATAACACACAGGTTCTTATCAATTGCCGGAACAACAAAAAACTTCTGGGCCGTGTGAGAGCTTTTGATCGCCACTGCAACATGGTACTGGAAAATGTTAGAGAGATGTGGACAGAGGTACCAAAGACTGGGAAAGGCAAGAAGAAAGCACTTCCAGTTAACAAAGACAGGTTTATTAGCAAGATGTTCCTTCGAGGAGATTCTGTTATCATTGTCCTTAGAAATCCCAAGTGAGAGATATGTAAAAGGAAATCTGGAGCTACAAGTGTGCGGAAGAGTGCATCACCTGAGTTGCAATTAGCACCTTTGTTAAACTTTGTACTTAGAGATGTTGTAGGTCATAATGAAAGTTATTTCGACTTAATTCCATGGTTCACTTTTAAGGAGTTTTATATGATACGGTTGAACGACGTATTGAAAGATCTCATAAAAAGTTAAGTCTCAGATAATTTTTCACGACTTCAT
>JK984001|Panax ginseng||VF-Pa-G-12-1a-T7_K23 Panax ginseng var. Chunpoong cDNA library Panax ginseng cDNA, mRNA sequence.
TGCTGCTGCTTCTGAAGAGGTTGAAGCCGCTTTAAGTTTCTCAACTTATATTTCTCATTCTCTCAACCTCAGTAAGGAAAGAAGTAAAAATGGCGTACGCAGCAATGAAGCCGACAAAGCCAGGGTTGGAAGAACCCCAGGTGCAGATTCATAAGATTAGAATCACTCTCTCTTCCAAGAATGTTAAGAACCTCGAGAAAGTGTGTTCGGATTTGGTTCGTGGTGCCAAGGAAAAGCTATTGAGGGTTAAGGGTCCTGTTAGGATGCCAACCAAGGTTCTTAAAATCACAACCAGGAAGTCTCCTTGCGGTGAAGGAACTAACACATGGGATAGATTTGAGCTACGTGTCCACAAACGTGTGATTGACCTCTTCAGCTCTCCTGATGTTGTTAAGCAGATTACTTCTATTACCATTGAACCTGGTGTTGAGGTTGAGGTTACCATTGCTGATTCCTAAATATGCCTAGTCTTTGATTAGGTAGTGTGAACCTTGTGTTTGATGGCCCTTTGGTAGTTTGGTAGTTTCATTTTCTGAGTCTCTAAAGTTGTTTTACTCGAGGTTTACATTAGGCTTCATGTAGTAAGAATTTTATTATTACAATTTTGATGTTGAAAAGTTGTTTGAATTCAAGAAAGGGATTGCTTTGTTGTT
>JK983993|Panax ginseng||VF-Pa-G-3-2a-T7_K04 Panax ginseng var. Chunpoong cDNA library Panax ginseng cDNA, mRNA sequence.
GTTTGAGCTGAACGATGTATTTGCCATAATAAACGCGGTTCCAGCCATAGCTCTAATGGCCTATGGTTTCTTCCATAATGGCCTCTTTCCTGGCCTCTGTTTTGGTGCCGGATTGGGAATCACTATATTTGGAATGGCCTACATGTTCGTTCACGACGGTCTTGTTCATAAACGGTTCCCGGTGGGTCCCATTGCAAATGTTCCCTACTTGAGGCAAGTTGCAGCTGCTCACCAGCTGCATCACATGGAAAAGTTCGATGGAGTTCCATATGGGCTGTTTTTGGGTCCTAAGGAAGTTGAACAAGTTGGAGGGCAGGAAGCGTTGGACAAAGAGATTAAGCGGAGAATCAAGTCTTCTAGTAGTAGTAGTGGTGTTAGGTTGTAAATACTCCTCCCGTCATAAAGAAATATGAGTGTGTATATGTTCCCCAACAACGGAAGAAAGGGGGGAAAGTGAGGAAGAAACAGATGTTGAAAAAGAGAATTAATGGCGGATCCCCAAGGACAAATAATTGATTTATCCATCCAAAGCAATTTACGCGAAGGACTCTCTTTAACAGAATATATTATTTCTTGCTACGGAGCCCGTAAAGGAGTTGTGGATACTGCTGTACGAACCTCAGATAAATTGAAATTCATTTTTATTATCTTT
>JK983973|Panax ginseng||VF-Pa-G-9-2a-T7_O24 Panax ginseng var. Chunpoong cDNA library Panax ginseng cDNA, mRNA sequence.
TTTTTTATCAGGAACGCTATGTCATTTACAACCCCAGCGTATTTCGGATGCTTGAAGGCCCCGCTGACCTTTAGAAAGATTCTTCTTTCTCGATGGTGATCGGTCATGGTATCCATAGCGTTGCTTCTTTTTCGGCCAAATCCTGATTTCGTTTTGCTTCTCCCGGTCGTCGAGCCTGATCGACTCGACTCTTTTCCCTGTCCCCCGGCCTCTCACTTCGTTTCGTTCTTCTTCTGTACCGTCGCTTGAATGAAGACACCCGATCGGCCCGACTTTCCCAAATGCCCACCACCGGCCCTTCTCCTTTCCGGGTCTGGATTTTTCGCGTCGTTTCCGTCGTCGTGGTCGACGGGGAAGAAAGAAAGGAATGAATGTTCTTTTGGGAAAATGTAGAATAAGACACCTGCCGAGACGAAAGCCAAAGGTGAGTCTCGTAGGTGGACGTATCGAACCGAAATAAGATCTCAGATTAACATCTTGATACACTGATTTACCATAATAATAAATAGAGTCAATGCTGACTCCGCCGTGGGAAGAGCCGCTTCTTTCTTGCTTGATAGGGGGGGCTTCCATTCACCAGCGCAGACTAAAAGTGCTCTCCGAACCGTGCTGGATAGTCACCCATCACACGGCTCTCAAACCCAACCTGT
>JK983947|Panax ginseng||VF-Pa-G-12-4a-T7_D18 Panax ginseng var. Chunpoong cDNA library Panax ginseng cDNA, mRNA sequence.
GACTTTAGCCTACCCCATTCCCGCCATGGCAATCTCTCCCCAATTCTCCCGTATCTCTTCCGGTGCCGCCTTCTTCTCGCCGGAACTCAAGGTCTTCCCCTGCCGTAAAACAGTCTCCTCTATCGGATTCGCCGCAAGGGAGTCGTCGTCCTCGACTGTGACCGTTGACGCCGACTTTGACACCAAGGATTTCCGGAAGAACTTGACGCGGAGGCCGAATTATAATCGAAAAGGATTTGGACGTAAGGAGGAGACGCTTGAGCAGATAAAAAGAGAGTACGCCAGTGACATCATAAAGACTCTGAAGGCAAACGGGAATGAATATACATGGGGAGATGTTACTGTAAAACTTGCAGAGTCGTATGGTTTTTGCTGGGGTGTTGAGCGTGCTATCCAGATTGCTTATGAAGCAAAAAAACAGTTCCCTGACGATAATATTTGGATCACGAATGAAATTATTCACAATCCCACTGTTAGTAAGCAATTTGAGAAGATGAAAATTAAGGATATCCCAATCGAGGATGGAAAGAAACAATTTGACGTCATTGATAAGGGTGATGTTGTGATGCTACCTGCTTTCGGAGCTGCAGTTGACGAGATGTTGGTTTTGTGATAGACGAAATAGAGTGGGAGCTATGCTTATAATT
>JK986591|Panax ginseng||VF-Pa-G-7-1a-T7_I15 Panax ginseng var. Chunpoong cDNA library Panax ginseng cDNA, mRNA sequence.
GCCATCTTGAACGCAACTACATGGCAAAACGTTTAGAGAACCACTACCCCGTTCTTTTCCGTGGTGTCAATGGAACAGTTGCCCATGAATTTATTGTTGATTTGAGGGGATTCAAGAATACTGCTGGTATAGAGCCTGAAGATGTTGCAAAACGTCTGATAGACTATGGGTTCCATGGACCAACAATGTCGTGGCCAGTCCCAGGAACACTCATGATCGAACCCACTGAGAGTGAAAGCAAGGCAGAGTTGGACAGGTTTTGTGATGCTCTTATCTCCATCAGAGAAGAAATTGCGCAGATTGAGAAAGGAAAAGTGGACACTCACAACAATGTTCTCAAGGGAGCACCTCATCCACCATCGCTGCTTATGGCAGACAAATGGGCAAAACCATACTCTCGAGAATATGCTGCCTTCCCTGCTTCCTGGCTCCGGTCTGCCAAGTTCTGGCCATCCACTGGACGCGTCGACAATGTGTATGGCGACCGGAACCTCGTCTGCACTCTTCTCCCAGCATCACAGGTGGTTGAGGAACAAAAGGCAGCTTCTGCATAAGTTGAGGCATTACACTGCAAAATCATTGTTCCCCTCTCCTCCTCTTCATGTATATAATTTATACTCTTTTACATTTACTGTCTTTCATCTTTTTACTATATTGATCATTTGCTGCTCTATTAAAAATAATTGTTGCTAATTGCAACTCTCAAGTACTTGTGTTATGATCCTCTTCTCCCTCGCCCTATCATTTGTCCCTTGTTAATTTTTGATGGTCATATTTGAAATGGATATTTACCCAAATATGACAAGTTAATATTTGGGTATGATAAGG
>JK986573|Panax ginseng||VF-Pa-G-2-3a-T7_N13 Panax ginseng var. Chunpoong cDNA library Panax ginseng cDNA, mRNA sequence.
AGTGTATTGATCTTTCTAGGGAGAAGGAGCCTGATATCTGGAATGCTATCAAGTTTGGGACTGTGTTGGAAAATGTGGTGTTTGATGAACATACAAGAGAGGTGGAATATGAAGAGAAATCAGTCACAGAGAACACTCGTGCTGCTTACCCTATCGAGTACATTCCAAATGCTAAGATCCCATGTGTTGGTCCACATCCAAAGAATGTCATACTTTTAGCATGTGATGCATTTGGTGTTCTCCCACCTGTGAGCAAGCTAAACATGGCACAGACCATGTACCACTTCATCAGCGGCTACACGGCTTTGGTGGCTGGCACTGAGGAAGGTGTGAAGGAGCCACAGGCAACATTCTCTGCCTGCTTTGGTGCAGCTTTTATTATGTTGCATCCTACCAAGTATGCTGCAATGCTCGCTACAAAAATGGAGAAGCATGGAGCAACAGGATGGCTCGTCAACACTGGATGGTCTGGTGGAAGCTATGGCTCGGGTAGCCGTATGAAGTTGGCATACACGAGAAAAATTATTGATGCAATACACTCTGGCAGCCTTTTGAAATCAAATTACAAAAAGACGGACGTTTTTGGGCTTGAAATCCCAACTGAAGTCGAGGGTGTGCCTTCAGAAATCTTGGATCCCGTGAACACTTGGTCCGATAAGAAGGCTTACAAGGAAACACTGCTGAAGCTTGGTGGTCTGTTCAAGAGGAATTTTGAGGTGTTTACCACCCACAAGATTGGCAAGGACAACAAGCTGACTGATGAAATCCTTGCTGCTGGTCCTATATTCTGAGCTGGTGGAACTGAAGTCTGGTAGAAGTTTGAAATA
>JK986556|Panax ginseng||VF-Pa-G-7-1a-T7_A07 Panax ginseng var. Chunpoong cDNA library Panax ginseng cDNA, mRNA sequence.
GTAGGTTAGAAGCAATGCTATTAGAAGCAAAGGGAGTCCTGGGCCGAGGCTGAAAAAGCATACTCAAGTCTTTTAGAGGATAATCCATTAGATCAGGTAATACTCAAGAGAAGGGCAGCTATGACAAAAGCTCAGGGAAACATTTCAGGGACCATTGAAAGGCTCAATCAATATCTTGAAACGTTCATGGCAGATCATGATGCCTGGAGGGAACTTGCTGAAATATATGTCTCCCTACAAATGTACAAGCAAGCAGCTTTCTGCTACGAGGAGTTAATATTATCTCAACCAATGATTCCTCTCTACCATCTAACTTATGCTGATGTGCTATATACACTAGGTGGACTTGAGAACCTTCAAACAGCTAAGAAATATTATGCGTCCACCATAGAGTTGACTGGTGGTAAGAACACCAGAGCACTCTTTGGCATCTGCTTGTGTTCATCTGCAATCGCACAGCTGACTAAAGGGCGGGACAAGGAGGACAAAGACAGCTCAGAGCTACAATCTCTGGCGGCGACTGTGTTGGGGAAGACTACAAGGAGAGATCTCCCAGCAATCTCTCTCTGCTTGCTTCCACCTTAAGAAGCTTGAAACTTTCATCCTAACTTTCCTACTATTGGCTGATGCTTCCAATTATTTCATTCCCCACTACTAAAAACTGGATGGGTTTTAGTCAAGTTTTTCAGATTTTTTGAACTTGTTATATTCGTTCAAGTACTTTTATCTTTTCTTCTACCTTTTACAAATGTTAAGATCATGGTGTGATGTAATTCATACTTCCAGTGACAACATATATTTTAGATATTCCTCTGTATTTTTCTTT
>JK986498|Panax ginseng||VF-Pa-G-10-2a-T7_K16 Panax ginseng var. Chunpoong cDNA library Panax ginseng cDNA, mRNA sequence.
GGTCCTCATGGTTGCTCTCTACACTCAATCGTGGGGTTAGATTCGAATTGGGTGTAGTTCAATCTCCCACTGAATTCAATCAAAAAAGCTTGTTTAGGTTACACTGCATACTAAATTTATCTTGGGGAAGTTGTTTGAATATGATTCTGAATGGATGCTCCTTGAAGTCTGGAGGAGTTTGTTCAATGGCTCCTAAATCTTATTACTTAGCTCCTGGATGTTTAGCTCGTGTGCCTGTTAAGGTTGCATCCCCAAGCATTAGAAGCTCATGGGAGCCTAATCGAAAGCTGAAGTTTGGCTCTTTCAAAGGTATTCAATCTCGTTGTCTTTCTGCTGGGTCATCGCCACTACTATATGGGGATCTTTGTGGCTTGTCACATGCCATCTCCAGGATACCTACGCGGCGTAGAAGTGTTATTTCTCCTAGAGCTGCCAAGGATGTCCCCTCTAGTTATAGGTACCCAGCCATGACCAAGAAGCCACAATGGTGGTGGAGATCTTTGGCGTGCCTCCCTTATCTAATGCCCCTTCACGAGACATGGATGTATGCTGAGACTGCCTATCATCTGCATCCTTTCTTGGAGGAATTTGAGTTTTTGACTTATCCTTTTTTGGAAGTTATTGGGAAACTGCCAAGCTGGTTTTTAATTGCATATTTCTTAGTTGCTTATCTTGGAATAGTGAGAAGAAAGGAATGGCCGCATTTTTTTAGGTTTCATGTCGTGATGGGGATGCTGCTGGAGATTTCACTGCAGGTGATAGGGACTATCAGTCGTCGTTGGTTGCCTCGTGCTGTATATTGGGGCAAGGTTGGTATGCATT
>JK983870|Panax ginseng||VF-Pa-G-6-2a-T7_C04 Panax ginseng var. Chunpoong cDNA library Panax ginseng cDNA, mRNA sequence.
GTTCGGTGGAGGAACTTTAGGACACCCTTGGGGAAATGCACCCGGTGCCGTAGCTAATCGAGTAGCTCTAGAAGCATGTGTACAAGCTCGTAATGAGGGACGTGATCTTGCTCGTGAAGGTAGTGAAATTATCCGCGAGGCTGCTAAATGGAGCCCTGAACTAGCTGCTGCTTGTGAGGCCACAGACAAAAAATCACCAATGGAGTTGATCAATGAGGTTCCACCAATCAAGGTCGAAGGCAGGATTGTTGCTTGTGAAGGAGACACCAATCCTGCGCTTGGGCATCCAATTGAATTCATATGCCTTGACAAGGATGAGCCGGCTATATGCAAGTATTGTGGCCTACGGTATGTTCAAGACCATCATCACTAACGGTTTGGTGCCTACCATTATGAGTGCACAAGGTGAATATCATTTTGCAAGTTCAGGGTCTTCATGCCCACCTTGTTTAAGCTGTAATTTGCCAATGTCTTGCTGTCTTGGTGTACTTTCATATGTTTCTTTTCAGCTAAAAAAAATAAGAATCTTATATCCCAACACATTTGGTGGTTCTAGATTGCCATACTTGGTGTGCTCCTAAATTTGCTATAAGGTGCAAAATTTGTGATTATTTATTGCATGATTTTATTGCTGGTT
>JK986449|Panax ginseng||VF-Pa-G-1-3a-T7_H16 Panax ginseng var. Chunpoong cDNA library Panax ginseng cDNA, mRNA sequence.
TTTATGAAGTCGCACTGGAGAGCTAGTGCTTGCTATCTAAGAATTGCTCCATGGATCTCATTGGAAATGTTTGATGCTTCTTGGGGCTTCTTTGGCGACCGTGAAGTCACCGGATGAATTGCCGAATAGATAGATCAGATCCGGACGCGGCTGTTGCTCCGCGGCGATACGGACTCGACCCGCTCCTACCCACCCCGGGGCACCATAGCATGTCGGGAATGAGGGGGGACATACTGGACGTAACCACTCCCTTGGTTGGGGACTGTGCCGCCCTGCCTTTCGATCGATACACAGTTGAGGAGGCCGATCACGAACGCTACAGGTGTGGGAGCGATCCTGGTCAGGGAAGGCTAAGACGGCGCCTCACATATGGGTAGCAAGAGGGCGCTTATGCCCCGACGGTGGGGCCTTATGGGGAAGGGCCCAGCCCAATAGGGACAGCACACCCCCCACTTCAAGCGCACCTCTGTATCGACTGAATCACTCTAAGGGTCTAGTCGGTGGAACCGGTGAACCACGCGAGCTGGTTAGATGCGTGGGGCAGAGGGCTCGTAGTACCCCCTTTTCTTGATCCAGCCTTTTCTTCGCTTCGGTAGTGAATCACTTACTAAAAAAAGGGGCAGGCCTGCACGCCTTATTTGAGACTACTAAGTCAGGCGGTGGACTCTTTCATTAGGGAAGAAGGGGCCTAAGCACGGCAGATGCCGTACACTTGAGTGGCAAAGGAAAGCGAGACCTTGCCTGTTTTTCCAGGCCCTGTTCGGACATACGGTTCCCGGCGGAGATCAAGTAGGAGAGCCGTGTGATGGGAAAACTTC
>JK986406|Panax ginseng||VF-Pa-G-13-4a-T7_H14 Panax ginseng var. Chunpoong cDNA library Panax ginseng cDNA, mRNA sequence.
TCTGGTGCTATCCTCTTTGAGGAGACACTTTACCAATCCACTGTTGATAAAAAGAAGATTGTCGACATTCTTGTTGAGCAGGGCATTGTTCCTGGGATTAAAGTGGACAAGGGTCTAGTTCCCCTGGCTGGCTCAAATGACGAGTCGTGGTGCCAAGGTCTTGATGGTCTTGCCTCTCGCTCCGCAGCTTACTACCAACAGGGTGCCCGTTTTGCCAAATGGCGTACTGTGGTGAGCATTCCCAATGGTCCATCTGCACTTGCAGTGAAGGAAGCAGCATGGGGCCTGGCTCGCTATGCTGCCATTTCTCAGGATAACGGGTTGGTCCCAATTGTGGAGCCTGAGATTTTGCTTGATGGTGAACATGGAATTGACAGGACTTTTGAAGTTGCCCAGAAGGTATGGGAGGAAGTCTTCTTCTATCTCGCCCAGAATAGTGTCTTGTTTGAAGGTATCCTCCTCAAGCCCAGCATGGTTACTCCCGGAGCAGAGTGCAAGGAAAGGGCTACACCACAACAGGTTGCTGATTACACCCTCAAGCTCCTCGGCCGAAGAATTCCCCCTGCAGTCCCTGGAATCATGTTTTTGTCTGGTGGGCAATCTGAAGTGGAGGCTACTCTGAACTTAAATGCGATGAACCAATCTCCCAACCCATGGCATGTGTCCTTCTCATACGCAAGAGCCCTTCAGAACACTTGCCTCAAGACCTGGGGAGGAAGACCTGAGAACGTGAAGGCTGCTCANGATGCTTTGCTTTTACGGGCAAGTGCAAACTCTCTTGCCCAGCTTGGAAAATACACTGGTAAAGGAGAGTC
>JK986402|Panax ginseng||VF-Pa-G-11-3a-T7_H19 Panax ginseng var. Chunpoong cDNA library Panax ginseng cDNA, mRNA sequence.
ATTTATGGAAAATTGGTGTTACCATAGGGATACCTTGATGAGCATTGCAAAGCACTATGAAACTGGAGATATTCTCCCAGACGATATATATTTGAAGCTTCTTGCAGCTAGGACTTTCCGTGCAGGCTCCCTAAGTCTTCTCCAGATAAGATTTGCTAGTGTTGATCTGGAGCTGCATACAAATTATGTACCTGATGGAACAGAATCTATATATGATGTTGATCAAAGGGTCAGCCAAAAAACGCAAGTGATCCCACCACTTCCAGAGGATAGGTTCCTCTGTGGTTTTAACCACATTTTTGCAGGTGGATATGCAGCTGGATACTACAGTTACAAGTGGGCTGAGGTGTTGTCTGCTGATGCTTTCTCTGCATTTGAGGATGCTGGCTTAAATGACGACGAGGCTGTGAAAGAAACGGGGCACAAGTTCCGAGAAACTGTACTTGCTCTTGGAGGTGGCAAAGCACCACTAGAGGTTTTCGTGGAATTCCGAGGCCGGGAACCATCCCCTGAGCCTTTGCTCAGGCACAATGGCCTATTAGCAGTCCCTGCATAAATTTTAGTGACATGTTTCCATTCAGTTGATGTATGGAACATAGCACGTAGCAATGACTGCTGGAATATTATCCACGGTTATTTAAATTGATTCTTAGTCCATTGCATGGTGTCTCCAGAATTTTGTCTACGGTTATTTAAATCGGTTCTTAGTCCATTGCAAGTCGACGTTTGCAATATATATCATTTCCTTAGAGAAAACTGGATATAATTTGCATATGCAGTAAATAAGAACAGCAGGAAACATACCCATCTTTCTT
>JK983769|Panax ginseng||VF-Pa-G-9-3a-T7_B15 Panax ginseng var. Chunpoong cDNA library Panax ginseng cDNA, mRNA sequence.
TCTCAGTCGCTGAGATAATACACACCGTAACCGTGTGCGTCTGAGAGAGACAATCGGTCCAACATGACGACAAGGTTCAAAAAGAACAGGAAGAAGAGAGGTCACGTGAGCGCCGGCCACGGTCGTATCGGTAAGCACCGTAAGCATCCCGGTGGTCGAGGAAACGCCGGAGGAATGCACCACCACCGGATCTTATTCGACAAGTACCATCCGGGGTATTTCGGGAAAGTGGGAATGAGGTACTTCCACAAGCTCCGCAACAAGTTCTACTGCCCTATCGTTAACATCGACAAGCTCTGGTCGCTCCTTCCTCAGGAGGCAAAAGACAAGGCCGATTCCCAGAATGCCCCCGTGATCGACGTCACTCAGCACGGATACTTCAAGGTTCTTGGTAAGGGTGTTTTGCCGAGTTCTCAGCCGATCGTTGTGAAGGCCAAGCTCGTGTCGAAGACCGCGGAGAAGAAGATCAAAGAATCAGGTGGCGCCGTTGTTCTTACTGCTTAGGTTTGAAGTTTAATTATTAAATTTCTAAGCTTTAAGGTTTTAGAAGTTTTAAGATGTATCTTATTGGACCTTTTTGCAATGCTACAGTTTTTTTTAAATATCTTTTGTTTAATGGTG
>JK983742|Panax ginseng||VF-Pa-G-5-2a-T7_C14 Panax ginseng var. Chunpoong cDNA library Panax ginseng cDNA, mRNA sequence.
GACTTTTGAAGTTGCCCAGAAGGTATGGGGAGGAAGTCTTCTTCTATCTCGCCCAGAATAGTGTCTTGTTTGAAGGTATCCTCCTCAAGCCCAGCATGGTTACTCCCGGAGCAGAGTGCAAGGAAAGGGCTACACCACAACAGGTTGCTGATTACACCCTCAAGCTCCTCGGCCGAAGAATTCCCCCTGCAGTCCCTGGAATCATGTTTTTGTCTGGTGGGCAATCTGAAGTGGAGGCTACTCTGAACTTAAATGCGATGAACCAATCTCCCAACCCATGGCATGTGTCCTTCTCATACGCAAGAGCCCTTCAGAACACTTGCCTCAAGACCTGGGGAGGAAGACCTGAGAACGTGAAGGCTGCTCAGGATGCTTTGCTTTTACGGGCAAGTGCAAACTCTCTTGCCCAGCTTGGAAAATACACTGGTAAAGGAGAGTCCGAGGAGGCCAAGAAAGAATTGTTCGTCAAAGGCTACGTCTACTAAGCTGTCTGAGCAGAAGCTATAGGTGTAGATGATGAAAGTCCGATGTATTACGATGACAAATTGCATTAAGATTATAGCCAATTAAGAGACATGTACTTTGAACAATTTAATAAGTTCTTGCATTGCAGCT
>JK986265|Panax ginseng||VF-Pa-G-14-2a-T7_M20 Panax ginseng var. Chunpoong cDNA library Panax ginseng cDNA, mRNA sequence.
GCTACCTAGTTGATCAATTCGGAAACATAAAGAACTTGATCACGGATCTAAGTGATCTACAATTCTGCCTGAAAAAATGTCACTGGAAATCACCACCGAACGCGTTTGTTACGTCCACTGCAACTTCTGCAACACAATTCTAGCGGTGAGTGTTCCATGCAACAGTATGACGACAATGGTGACAGTGAGATGCGGGCACTGCGCAAATTTGTCGTCTGTTAATATGGGAGCTTTGCTTCAGACAATTCCCCTTCAAGATCTACAGAAACAACAGTCCAGCTTTGAAGATGCTAAGAAAGATTGTGGGTCGTCTTCTTCTAAATGCAACAAGTTTGCAGCATTTGATTCTGCTGAGCAACAACCACCTAGAATGCCTGCCATACGCCCCCCTGAGAAGAGACAACGTGTTCCTTCAGCATATAACCGATTTATTAAGGAGGAAATTCAAAGATTAAAGGCCAGTAATCCAAATATCAGCCACCGTGAAGCCTTTAGCACTGCCGCTAAAAATTGGGCACATTTTCCTCACATTCACTTTGGACTAAATAGCAACAAGCAACCAAAGTTAGATCATGCAGTGGCAGGAGAGGGAGCTCAAAAGTCTCGTGCCTTCTACTAAAACAACAATGGCACATTTTGCTAATAAGTCTGAGGTTCATGACGAAAATTCCTAACCACATAGGAAGACCATCATAAAAACCTCATTTTCATTGATTGATTTTAATTTTAATTTTTTTTTGTTTTTGTTTGCTATATTATGATATAATTCCTTTGAAGGTACTTGAATTTTTTTCTTGGTGATTT
>JK983639|Panax ginseng||VF-Pa-G-5-3a-T7_B05 Panax ginseng var. Chunpoong cDNA library Panax ginseng cDNA, mRNA sequence.
AACAAGTGTTTGTTTCGGCCCTCTTCTTCACTTCTCAGGCGCCATTTCTTCTTACAGCTTGATTTGTGAGGATGGTGAGGGTAAGTGTCCTAAATGATGCTCTCAAGAGCATGTACAATGCTGAAAAGAGGGGTAAACGACAAGTCATGATTAGGCCCTCATCAAAAGTGATCATCAAGTTTCTTCTGGTCATGCAGAACATGGTTACTATAGGGAGAGTTCGAGTATGTTGATGACCACAGATCTGGAAAAATTGTGGTTGAATTGAATGGCAGGCTGAACAAATGTGGGGTCATTAGTCCTCGTTTTGATGTTGGTGTCAAAGAAATTGAGCCATGGACTGCAAGACTGCTTCCCTCAAGACAGTTTGGGTACATTGTACTGACTACATCTGCTGGCATCATGGATCATGAAGAAGCAAGGAGAAAGAATGTTGGTGGTAAAGTACTTGGCTTCTTTTACTAAGCAGCTTGGCTACTTTTACTAAGCAGAGATTTTGGAGGATTATTTTGGTCATTTAGCCTAGTGTTTCTTTCCCTCCTTTTTCTTTTTACTTTTCCTATGAAGATTAATGTTTCTATGTTGGAA
>JK986196|Panax ginseng||VF-Pa-G-8-4a-T7_B22 Panax ginseng var. Chunpoong cDNA library Panax ginseng cDNA, mRNA sequence.
ATTGACTTTTCTAACATTCTGAAACTGATCGCACCACAATCTTTCTCTCTCCTAAACTTTCACTTCTGACTTTCTGCTGCTGCCGCGAGTGTCTGAGAGAGCTCAAAAACCGATGGAGAGTCTTCCCGCTGGTTACCGCCCCAACGTCGGCGTCTGTCTTGTTAATTCTGATAATCTGGTCTTTGTGGCTTCTAGATTGAATGTTCCAGGAGCATGGCAGATGCCTCAGGGAGGAATTGAAGATGGTGAGGAGCCAACATCTGCTGCAATTAGGGAATTGCGAGAAGAAACTGGAATAGTGTCAGCTGAAATTATTGCTGAGGTTCCGCAGTGGCTGACCTATGACTTCCCACCAGCTGTGAAAGCCAAAGTAAATCGTCTCTGGGGAGGTGAATGGCATAGACAGGCACAGAAGTGGTACCTTATGAGATTCACAAAAGATGAAAGCGAGATCAACTTATCAAGTGGTGAAGTTGACCCAGAATTCTCAGAGTGGAAATGGGCAAGCCCTGAAGACGTAATTGAGCAGGCAGTGGACTACAAGAGGCCAACATACGAGGAAGTTATGAAAACCTTCAGGTCTTACTTGAGTGAAAGTGGAACACCTGCTAAATGTCGTTCAACAAAATGGTGAATCGTTATGTCTGATTCTGCAGCTGTACCTGTGTTTCTGATTCAATTACTGAGATTCCGAATTTAGAATCTACTTTGCTCTTTGTAAATGGATATGGCAGTTTTTTAACACCTTCAGATTTAGGGATCATTAATTTTAATAAAATGGTTGTCCAAAATTTCAATTC
>JK986100|Panax ginseng||VF-Pa-G-8-3a-T7_P19 Panax ginseng var. Chunpoong cDNA library Panax ginseng cDNA, mRNA sequence.
GACAACTGAAAGATATAGGCTGCAAGTGGGTAATTCTTGGGCATTCAGAGCGAAGACATGTGATTGGTGAAGATAATGAATTTATAGGGAAGAAGGCTGCTTATGCCTTAAGTCAGGATCTCGGTATAATTGCCTGCATTGGAGAACTGTTGCAAGAAAGAGAAGAAGGAAAAACATTTGATGTTTGTTTTCAGCAACTGAAAGCCTTTGCAGATGCTGTGCCCAATTGGGATAATGTTGTCATTGCATATGAGCCTGTATGGGCAATTGGAACTGGTAAAGTGGCCTCACCACAGCAAGTTCAGGAAGTGCATGCAGCTGTTCGTGAGTGGATCAGTAAGAACGTTTCAGCAGAAGTTGCTTCTAAGACACGTATTATCTATGGAGGATCTGTTAATGGGGGCAACAGTGCCGAACTGGCTAAAGAAGAAGATATTGATGGATTTCTTGTAGGCGGTGCTTCCTTAAAGGGTCCTGAATTTGCAAACATTATCAATTCTGTAACATCAAAGAAGGTTGCTGCTTGATCATTTGAGGCGGTGAAATAAATGGGTTAGAAAATATTCTTAAACCAGATGCATGAAGTTAGTGACACGAGTCAGTTCAATTTGGTGGGATTTTTGATCATTTTTCATTTCTCCCTTTGCCATAAGGATGAAATTATCACCAAGGCTTGGCTGCTCAGTTGATTTGTTACTAAAAATATTTATGAAATAGAATAATTGGGAGTTTATAATGTTCAACGGTAAAAACATTATATAAACTTCTCCATTAGAATGAGAATTTCATGCT
>JK986064|Panax ginseng||VF-Pa-G-11-2a-T7_A02 Panax ginseng var. Chunpoong cDNA library Panax ginseng cDNA, mRNA sequence.
AACACGGTCTGAAATCAGAATTGGAAAAGTCTTCTCCTTCATTGGGGGCGCAGTGCAATTTATGTGAAAGACTCACGTATCAATGGATTGCCAAGGTACCTAACAGTTCAGTTTGTCCGGTTTTTCTGGAAGAGGGAATCCAACCAGAAGGCAAAGATTTTGCGGAAAGTGGATTATCCATTGGAGTTGGACATTTATGATCTGTGTTCAGATGATCTTCGAAAAAAATTGGAAGCTCCTCGACAGACTCTGAGAGATGAGGAAGGTAAAAAGCTTGGTTTAAAATCTAACCAGAAGAGCTCCATTTCAGTGGACAACGATGTCAAGATGTCTGAAGCTGAGGGATCATCAAATGGAAGCGGAGAATCATCCAAAGCAACTTCTGAAGGAGGTGTTGTGCCTGCCAAAGAAATGCAGTTGACTGGAATATATGATTTGGTTGCTGTGCTGACTCACAAGGGTAGAAGTGCTGATTCCGGGCATTATGTTGCTTGGGTCAAGCAAGAAAGTGGTAAGTGGATTCGATATGACGATGATAACCCTATCCCGCAACAAGAGGAAGATATCGTAAAACTTTCAGGAGGAGGTGATTGGCATATGGCGTACATTTGCATGTACAAGGCTCGATCTGTTCCTATGTAATATCATTTTTCTTGCGGTCTTCAATGCAATTTGGATCATCAAAATTGAACTTGATGGTTGCATAGGATATACATTAAGTTGAAACTTTTGCATTTTCAAGGTACTTTCGAAACCGAGTATAATTTGATGATGAATAATATCTCAAATT
>JK986023|Panax ginseng||VF-Pa-G-2-4a-T7_H22 Panax ginseng var. Chunpoong cDNA library Panax ginseng cDNA, mRNA sequence.
TCTTCTCTCCTCTTTCAGCACTTATCACCGAAAATTATCTACAAGCAGCTGCCGGAGCAGCAATCGTTAAATATGGCCGCAATGGCTTCCCTTCAGAGCTCTTTTACTTCTCTTTCTCTCTCCTCCAGTTCGATCTTAGGCACACGTTTTTCTCCCATTCTCGGCCCACCTCTGGTCACATCTATAGAGCAGCCATGTCCCATTGTAATGAAGCTAAAGCGATGGGAACGGAAGAAGTGCAAGCCTAACAGCCTTCCAGTGTTGCAAAAGATGCATGTTAAGCTTGGAGATACTGTAAAAGTTATAGCTGGACGTGAAAAGGGTAAAATTGGTGAGATAATTAAGATTTTTAAGCATAACAGCTCTGTGGTAGTGAAGGAAATTAACTTGAAGACCAAGCATATGAAGAGCAGGGAAGAGGGTGAGCCAGGGCAGATAGCAAAGATAGAAGCACCTATTCACAGCTCAAATGTAATGCTATACTCAAAAGAACAGAATGTAGCCAGCCGTGTAGGTCAAAAAATACTGGAAGATGGAAAGCGAGTTCGTTACCTCATAAAAACCGGGGAAATAATAGACAGTGCAGAGGAATGGAAGAAAGTGGTCAAAGAGAAAGAGAATACGGAAGAAGTTGTTGCTGCTTAGGAGCCTCCACTTGTGACTCTCCCCTTGATGTATTTGCTGTAACTATCTACTTTCCAGTCTTCTTCTCATCTTTTTGTACGTCACATTCCATATTTGTTGCAACTCCTTTTTAAATTGAAGAAATATAAAGGATGTTCTGCTC
>JK985995|Panax ginseng||VF-Pa-G-2-4a-T7_B24 Panax ginseng var. Chunpoong cDNA library Panax ginseng cDNA, mRNA sequence.
ATCTGTTGGAATTCGAATCTGATTTGCTCTCTTCCTTCTCCCATCTCTCTATTTCATCGGAAAATCAAAACCAGAAAAAGAAGAATAAGATGTTTCTTTTCGATTGGTTCTATGGCGTGTTAGCCTCGCTCGGATTATGGCAAAAAGAGGCTAAGATCTTGTTTCTAGGGCTCGATAATGCCGGCAAAACTACTTTGCTTCACATGCTCAAAGACGAGAGATTAGTTCAGCATCAACCGACACAGCATCCGACGTCGGAGGAGCTGAGTATTGGGAAAATCAAGTTTAAAGCTTTTGATTTGGGAGGTCATCAGATTGCCCGCAGAGTCTGGAAGGATTACTATGCCAAGGTTGATGCGGTTGTTTATCTTGTGGATGCCTATGACAAGGAGCGTTTCACTGAATCAAAAAAGGAGTTGGATGCTCTCCTTTCTGATGAGTCCCTGGGCACTGTCCCATTCCTCATTTTGGGGAACAAGATTGACATTCCATACGCTGCTTCAGAGGATGAGTTGCGCTTCCACCTTGGCCTAACTGGCGTCACCACTGGCAAGGGGAAAGTGAATCTAGCAGATTCAAGCGTGCGTCCCTTAGAGGTATTTATGTGCAGCATTGTACGCAAAATGGGATATGGTGATGGATTCAAGTGGGTTTCTCAATATATAAAGTAGGTTAAATGTTGAGCGAGAAGCTTTATGATGTAATCCCTCCTCTTTTGAAGAAGAGGCAAACATCCAAAAGAAAGATTAAAATTGATATGCATTCCCCAGCTTGATTTGATCTGT
>JK985992|Panax ginseng||VF-Pa-G-15-1a-T3_E21 Panax ginseng var. Chunpoong cDNA library Panax ginseng cDNA, mRNA sequence.
TATTAATAGTGGGCCGGCAAATTGAGGATCAAGTTAAGTGACAGATTTATTACCATTCTTTCTTTCACGTGATCAATACCGGCAGACAGATAGAGATCAACTTCGTCGAACCTAGTGGAGAAGATGATCGTATGCGTCGCCGTCGTCGGCCACCAGAACAATCCGCTATACATACAGAGCTTTACAGAAGCAGATGATGCCCTAAAACTTCATCACATAGTCCACTGCTCCCTTGACGTTGTCGACGAAAGAGTGAACAATCCAAAAAAATCTGGACCAACACTAAATGAGACATTTCTTGGTCTTCTTTATCCAACCGAGAATTACAAAGTGTATGGCTATTTGACCAACACAAAGGTGAAATTTATATTGGTGACAACAGATCTTGATGTCAAGGATGCAGATGTGAGAAATTTTTTCAGAAGGTTCCACTCTGCATATGTTGATGCAGTCTCGAACCCATTTCATGTTCCAGGTAAGAAGATAACCTCCAGAACCTTTGCTGAAAGGGTGAGTACTATTGTTAAATCATTTGGTTCGAGTTCAGCTGGGTGAATGACAACCACTGTCACCTAGTATAATTGGCGGTGCTGTTTGATTTATTTCTCGTATTGTACCTTTAATGAGGGGTTTGAGTTGGGTTGGCAATGGCATGCTGAGAAATTAATTAATCAGGAGGGAACATTGGTTTGTAAGATTTACCATCCCTTTGTAGAACATGAAATTTGTCATGTATTAGATCCAGTGTTTGACGTTGATGTACTAGTAATATTCTTCATCCCCC
>JK989078|Panax ginseng||VF-Pa-G-6-1a-T7_E11 Panax ginseng var. Chunpoong cDNA library Panax ginseng cDNA, mRNA sequence.
GAGTGAGAATGCTGACATGAGTAACGAGAAATCCTGTGAAAAACACGATCGCCTGCCAGTGGAAGGTTTTCTGCGTTCAGTCAATCTACGCAGAGTGAATCGGTCCCTAAGGAAACCCCGAAAGGGCTGCCGTCCGATGGGTACACGAAAGTGACGAAGTTGCTTTGACTACAGAACCATGCCTGTATGTTGGAGCGAATTGGATGATCGGGCCGAGGGCTGCCCCCTCTTCCCCTCACTCTCCTTTCCCTAATATGAACCTTGAGTCATCAAAGCCTTTCTGACTCGGCCTGGCCCGGTCGCCCTACGCGACTGGCAACTGTTGTCATAGTCAACAAGGTTGAAACTTCCAGGAAAAAACTTCGAATTGGGAGGGCGATCCTCCCGGTGAACTGACCGTACCCCAAACCGACACAGGTGAACAAGTAGAGTATACTAGGGCGCTTGAGAGAACCATGTCGAAGGAACTCGGCAAAATGACCCCGTAACTTCGGGAGAAGGGGTGCTCTCCTATCTTTTGATTAGGAAAGCGGCACATACCAGGGGGTAGCGACTGTTTATTAAAAACACATGACTCCGCTAAGTGGTAACACGATGTATAGAGTCTGACACCTGCCCGGTGCTGGAAGGTCGGAAGGAGAAGTGTTATAAGCTTTGAATGGAAGCCCCGGTAAACGGCGGCAGTAACTCTAACTGTCCTAAGGTAGCGAAATTCCTTGTCGCATAAGTAGCGACCTGCACGAATGGTGTAACGACTGCCCCGCTGTCTCCGACATGGACCCGGTGAAATTGAATTCTCCGTGAAGATGCGGAGTACCAACGGCTAGACGGTAAGACCCCGTGCACCTTAACTATAGCTTCGCAGTGACAACCTTGATCGAATGTGTAGGATAGGTGGGAGGTGGTGACACACAACGACCAATCCTGAAAGACCACTCTTTCGTCTAAGGATGCCTAACCGCCGCAC
>JK989025|Panax ginseng||VF-Pa-G-2-1a-T7_K15 Panax ginseng var. Chunpoong cDNA library Panax ginseng cDNA, mRNA sequence.
CTCCTGGTTCCTGCTCCTGCTTCTGCTCCTTCTCGCCCAGCTAGAAAGATTGGACAGGACAGAAGCATCAAAATAAAACTCACTACAATACCCAAAAAGAAAAACTGTAAGACAAAAGCTAAATAATACAGATTATCTGTACAAAACAATCAATCGAAGAAGCATCAATCGATGGCTGATGCTTACTGCTCCGACTGCAAGAAAAATACCGAAGTTGTTTTCGATCACTCAGCCGGAGACACCGTTTGCTCCGAATGTGGACTTGTTCTGGAGTCTCACTCCATTGATGAGACCTCCGAGTGGCGTACTTTCGCCAACGAGTCCGGTGACAACGACCCCGTCCGTGTCGGTGGTCCCACCAACCCTCTCCTCACAGACGGCGGCCTTTCCACCGTCATATCCAAACCCAACGGCGTTACCAGCGATTTCTTGTCTTCGTCCCTGGGTCGCTGGCAGAATCGCGGTTCGAACCCGGATCGGTCCCTCATTTTGGCCTTCAAGACCATAGCCACCATGTCCGACAGGTTGGGCCTTGTTGCAACCATTAAGGATCGTGCTAATGAGATATACAAGAAGGTAGAAGATCAAAAGTCTAGTAGAGGAAGAAACCAGGATGCAATATTGGCTGCTTGCCTGTACATTGCTTGTCGACAAGAAGACAAGCCGCGAACTGTAAAAGAAATTTGCTCTGTTGCCAATGGAGCGACAAAGAAGGAAATTGGCCGAGAAAAGAATACATAGTGAAACAACTAGAGCTTGAGATGGGTCAGTCAGTGGAGATGGGTACTATACATGCTGGGGATTTTATGAGGCGCTTTTGTTCAAATCTTGGTATGACAAATCAAACAGTCAAAGCTGCCCAAGAAGCAGTCCAAAAGTCGGAAGAATTTGATATAAGGAGGAGTCCTATATCTATTGCTGCAGCAGTTATCTATATTGTAACTCAGCTTTCTGATG
>JK988914|Panax ginseng||VF-Pa-G-6-2a-T7_I12 Panax ginseng var. Chunpoong cDNA library Panax ginseng cDNA, mRNA sequence.
ATAACACCATCAGAACTCGTTCGGGATAAGATTATGAAATTCCTATCTTCCCAATTTTATTGATCTTCCCTTTCACTCTTCCTCTTCATTTTCTTCCTCACCGGTCACCACCATGGCTGTCTCTGCAACTGCGCTCTCTAAATTCTTTTCCCTCTCACTCCACACCCCTCCACCTCGTTTCTCTATTCTCAACCCCAACCAATTGCCTTCTATCTCCTCCTCTGACCTTTCTTTTTCACCCCTTTTCCTCTCCACAAAACTCAAACCCCTCCGAGCTCAAGAGCAAGAGCTAGAGCTAGAGCCCACCGCCTCCGACTCCGATACCATCTTCTTCGACAACTTTGACCCAGATGCAATCATTATTTTCGACCCACCGGAAGCCCCAGAAGACTTCGTCCCGCCGCCCTCTTTCGACGACGGCCCGCCGGAATCTGAAGACGAAATCGCCGCCGCCTATGAAGAACTCTACGGGCCGGCCTACAGTGGAGTCTCAGTATTGGGGAATGACATTTATGTAATGGATTCGAAGGTGAAGAAGACGGGGGCATTGGGGAAGGTGAAGAAAGAAAAGGTAAGGGATGGGTTTGACGAAAGAGTGATTCAGGTGAGAAGGGTAACGAAAGTGGTCAAAGGAGGGAAGCAATTGCATTTTAGGGCAATTGTGGTTGTAGGGGATAAAAAGGGACAAGTAGGTGTTGGAGTTGGAAAGGCCAAGGAGGTTATTGCTGCCGTTCAGAAGTCGGCGACCAATGCTCGCCGGAATATTATTACTGTGCCCATGACTAAGTACCTCACATTTCCTCACAGAGCTGATGGGGATTATGGGGCAGCCAAGGTGATGCTTAGACCTGCTTCCCCTGGTACTGGGGTGATTGCTGGAGGTGCTGTAAGGATTGTTCTGGAAATGGCAGGTGTTGAGAATGCTCTGGGCAAACAGCTTGGCA
>JK988894|Panax ginseng||VF-Pa-G-14-2a-T7_A10 Panax ginseng var. Chunpoong cDNA library Panax ginseng cDNA, mRNA sequence.
TTTACCAAATAAAAACTCCATTAAACCCTACTAAGAGAGAGATTGATGAAAGAAGAAAACGGTACAAGCCGTAAACGGAAAAGAGGGAAGAGGCAGAAGAGGAAGAAGAAGACTCAAACTGAAAAATCGTTCGACCAAACATTTAGTAATCATAATGATACTAATACCATTAGAAATTCCTCAAAGCCTTCCACTTTTCTTGACAAGATGAAAGCAAGGTTATCAGGAGGCCATTTTAGAATGATTAATGAGAAGCTCTATACTTGCTCTGGGGACGAAGCGCTTAATTATTTCAAAGAAGATCCTTCATTGTTTAGCATGTATCATGCAGGATATCAAGAGCAAATGTCACATTGGCCTGAACAACCTGTTAATATTATTATAAAATGGCTAAATTATCACAGCCCTTCTTTAGTTGTGGCTGATTTTGGCTGTGGGGATGCTCACCTTGCAAAAAATGTCAAGAATAAAGTCTTCTCTTTTGATCTTGTCTCAGACAATCCTTCGGTAGTTGCCTGTGATATGTCAAATACGCCTCTAGATTCTTCATCAATAGATGTTGCAGTTTTCTGTCTTTCACTGATGGGGACGAACTTCTCAAGTTACCTTCAGGAAGCACAAAGAGTTCTAAAACCATGTGGCTGGCTGTTAATAGCAGAAGTGAAGAGCAGATTTGATCCCACTACCGGGGGAGCAGACCCAGATAAGTTTTCAAAGGCAATACGTGAACTAGGATTCACCTCTGTATCAAAGGACTTCTCAAATAAAATGTTTATACTTTTCTATTTCAAGAAAAAGGAGAAGCAAAATTTAAAGGAAATTGATTGGCCTGAGCTGAAGCCTTGCTTGTACAAGCGTCGATGAGCTCAGAAAACTGTTTGAAGTTAATGGGCTTGCCTCATTTTGTTGCTCATGTATAAATTCAAAATTGGTGTCCATACCC
>JK988885|Panax ginseng||VF-Pa-G-14-1a-T7_M01 Panax ginseng var. Chunpoong cDNA library Panax ginseng cDNA, mRNA sequence.
TGAAACGGGCCAGGTGATATCCACATTTTCGACGGGGAAGATTCCTTATGTGGTTAAGCTCAATCCTGATGATGATAAGCAGAATATACTTTTGGCTGGTATGAGTGATAAGAAGATTGTTCAGTGGGATATGAATACTGGGCAGATTACTCAGGAGTATGATCAGCATTTGGGGGCGGTGAATACAATTACCTTTGTTGATAATAACAGAAGATTTGTCACTTCTAGTGATGACAAGTCTCTTCGTGTTTGGGAATATGGAATCCCTGTTGTTATAAAGTATATAAGTGAGCCTCACATGCACTCTATGCCATCAATATCCCTCCACCCAAATACGAATTGGCTTGCTGCACAGAGTTTAGACAATCAAATTCTTATTTATAGCACCAGGGAGAGATTTCAGCTCAACAAAAAAAAGAGGTTTGCGGGGCACATTGTTGCTGGATATGCCTGTCAAGTCAATTTCTCTCCAGATGGGAGATTTGTAATGTCCGGAGATGGTGAGGGTAAATGCTGGTTTTGGGATTGGAAGAGTTGCAAAGTCTTTAGAACTCTCAAGTGCCATGAGGGAGTATGTATAGGGTGCGAGTGGCATCCGTTAGAGCAAAGTAAAGTTGCTACTTGTGGCTGGGATGGCTTAATCAAATACTGGGATTAACCATTTCAGCGTCAGAATGTAGCAGCGGGTGTTGATGACTGAGAGTTGGTTGGTTTTATTGTCCAAGAATGGTTTTAGAATCGGACCTTGCAATGGGGAATATAAGGCCCCTTACTATGTGAAGAGTATTGGTTATGTAGAATCCTAGGAACTTCACAAATGAGCTCATCTTTGTGAGTTTAGTCTATAAATCTAGCCAAGTTTTTGACCTGTGAAATACTTTTTATTTTTTTTATTTGTAAGTGACCTTTGGATACAATTCGGGATAATTTATATTTTTCCTG
>JK988881|Panax ginseng||VF-Pa-G-1-2a-T7_P23 Panax ginseng var. Chunpoong cDNA library Panax ginseng cDNA, mRNA sequence.
GCGTATTATTGGGTCAAATGAAGCTGATGATAGTTTGATCTTGAGCTTACGGTCCATCCAGTATGACCTTGCATGGGAACGATGTAGACAGCTTCAAGCTGAAGATGTTGTTCTCAAGGGTATGGTTGTTGGTGCAAACAAAGGTGGAGTTGTGGCCGTGGTTGAGGGCCTTCGTGGATTTGTTCCCTTCTCACAAATATCAACGAAATCAGTTGCGGAAGAGCTTATTGAGAAGGAGATTCCGTTAAAGTTTGTCGAGGTAGATGAGGAACAATCTAGACTTGTTCTCAGTAACCGCAAGGCCATGGCGGACAGCCAGGCCCAGCTTGGAATTGGATCAGTCGTCACTGGAACTGTTCAGAGCTTGAAACCTTATGGTGCCTTCATTGATATTGGTGGAATAAATGGGCTTCTTCACGTCAGCCAGATCAGTCATGATCGCGTCTCAGATATCGCAACAGTCCTTCAGCCTGGTGACACTCTCAAGGTCATGATACTTAGCCACGATCGTGAGAGAGGCCGAGTTAGTCTCTGTACTAAGAAATTAGAACCTACTCCCGGGGACATGATTCGCAATCCAAAGCTAGTTTTTGAGAAGGCAGAGGAGATGGCCCAGACGTTAAGGCAGAGAATTGCTCAAGCAGAAGCCATGGCTCGTGCTGACATGCTGAGATTCCAGCCTGAGAGTGGATTGACTCTCAACTCAGATGGTATCCTGGGTCCACTCGCTTCGGACTTACCTGCAGAAGGTCTGGATTTGAGTGATATTCCCACAGCTGAAGATTAATGAAGATGAACATCATTTTCAACTACTACTCTCCCTCCCTCTTCCCCTACCCATGGGGGTTTGTAAGCATAGTTTTTGTATAATTCTCCAAAATATAAATAGGTTATACCTCAATCCTGTAACAATCTATTTTCACGGAGACCATCTTTCTTCCC
>JK988872|Panax ginseng||VF-Pa-G-2-3a-T7_D07 Panax ginseng var. Chunpoong cDNA library Panax ginseng cDNA, mRNA sequence.
TTGATGAACGTCGATAGCTTGAGGGCGCATCCCTGGCTTATCCCGTCGCGATCCGTCGATAGCTTGTGTAGGGGTAGGCGACAGTGAGGAGAAATTTGGTACTCACTCCCAAAGTCCAGATCTGTTGGAATTCGAATCTGATTCACTCTCTTCCTTTTCCCATCTCTCTATTTCATCGGAAAATCAAAACCAGAAATAGAAGAATAAGATGTTTCTTCTCGATTGGTTCTATGGCGTGTTAGCCTCGCTCGGATTATGGCAAAAAGAGGCTAAGATCTTGTTTCTAGGGCTCGATAATGCCGGCAAAACTACTTTGCTTCACATGCTCAAAGACGAGAGATTAGTTCAGCATCAACTGACACAGCATCCGACGTCGGAGGAGCTGAGTATTGGGAAAATCAAGTTTAAAGCTTTTGATTTGGGAGGTCATCAGATTGCCCGCAGAGTCTGGAAGGATTACTATGCCAAGGTTGCATTCCCTGCCTTAAAGAAATTGAAGATTTCTGGTCTGGATAAAGTACATCATCTCTTTAATGGCAAGGTTGTATTCCATACATTGGAGATATTGGATGTCTACTCTTTGGAAACAGTCGCTCAAATTTGGGAAAAGCAATATCACATAGACGACTCCTTTTGTGAGTTAAAGATGTTAAAGGTGAAAGAGTGTCCTAAATTGGAGACAGTGATTCCACCCACCATGGTCCAGAAATTACAACATCTGAAAGGTCCAAGTGTTCTTGATTGTAAGTCGGTGATCTCCGAAATGGAAGGACCAAGTGGTGGTGGATACATTGCATGGCGTTCCACCTTCTAGACGTTGATTTAGAAGTTGAAGCTTTTATGTAAGTTGTTTTTTCTGTTTGCATTTATGTCTTAGTTATGAAGCATCACTTGAGCAAACCAATGCTGTGGACGGGTGATGAATATTACTTGAAAATTGAA
>JK988858|Panax ginseng||VF-Pa-G-10-1a-T7_C11 Panax ginseng var. Chunpoong cDNA library Panax ginseng cDNA, mRNA sequence.
GTGAAGCTCTCTAATCTCATTCATGGCAATGATGAGAAGAATTAACGGAATAGCCGTCGTTGGCCGAGCCATGAGCGGCGTCGCCGCCTCATCGGCATCCAGAAACGCAGCTCAACAACGGCTGTACCAAGCCGCTTTGTACAGCACTAGTTGCAACTCCTCTACGATGTGGTCTCGATGGTTCTCGCGTGACAGGCTAGCCCATTCGAATCGCTGCTCCACCGCCCAAGGCGTCGCCGGGGTCATGTTCTTCTCTGTCGCTGCTTCCTCACTCGCTGAAGAAGTCCATGCCAAAGAACCGCTGCAGTACAACAAGTTCGCCCCCAAAGATGTCGTTCTTTATCAGTATGAAGCTTGCCCTTTCTGTAACAAGGTTAAAGCATTCCTGGATTACTATGACATTCCTTACAAAATTGTTGAGGTCAATCCTCTCAGCAAGAAGGAAATTAAATGGTCAGACTACAAGAAGGTCCCTATATTGCTGGTTGATGGTGAACAGATGGTCGACTCATCAGCAATCATTGATAACTTGTCCCAAAAGATACGTTCTGAGCTCCCGGATGACTGTCTTCCTGATGTTAGTGAAGAAAAATATTGGCGAGGGTGGGTGGACAATCACTTGGTGCATGTCTTGTCACCAAATATCTATAGATCTCCCTCTGAGGCTCTCGAGTCGTTTGATTACATTACAAGCCATGGTAATTTCAGCTTCTTTGAGAAGATGACTGGCAAGTATGTTGGAGCTGCAGCTATGTATTTCATATCAAAGAAATTGAAGAAAAAATACAATATAGTTGATGAACGCGCAACCTTGTATGAAGCTGCGGAAACATGGCTGGAAGCTCTAAAGGGCCGTGAATTTCTTGGCGGGTTCAAACCTAACTTGGCGGATCTTGCCGTCTTTGGTGTTTTAAGACCCATACGCCACCTTAAGTCTGGC
>JK988847|Panax ginseng||VF-Pa-G-9-2a-T7_A14 Panax ginseng var. Chunpoong cDNA library Panax ginseng cDNA, mRNA sequence.
TCGCTCCCCCGTGCCGTAGCTAGGTGGGTCTCTTTCTCTCTCCTTGCGATTAGATTCACTTCTCTACTGACTGCTCCAAAAAAAATTTAAGTGTTTTTGGGTTTTCCAGAAAAAGGGATTTCGTTTTTTTCTCTTCTTGATTTGAAGTACAACGAACCAAGAAGAAGAATCATCCTAGTTGAAGAACAAGAAAGAAGAGTCGATACCCAAAAGGGGTTCCTCTTAATTGAGGAAGAAAGATCTGGAAAATGAGCGCTTCCAGGTTCATAAAGTGCGTGACTGTTGGTGATGGTGCTGTTGGTAAAACCTGTATGCTCATTTCCTACACCAGCAACACTTTCCCTACGGATTACGTGCCGACTGTCTTTGACAATTTCAGTGCAAATGTGGTTGTAGATGGGAGCACCATCAACCTAGGGTTATGGGATACTGCTGGTCAAGAGGATTACAATAGATTGAGACCTTTAAGCTATCGCGGAGCAGATGTATTTCTTCTTGCATTTTCTCTCATTAGCAAGGCTAGCTATGAAAATGTTGCAAAGAAGTGGATACCTGAACTTAGGCATTATGCACCTGGAGTTCCAATAATTCTTGTTGGAACAAAGCTTGATCTGAGGGATGACGAGCAGTTCTTTGTAGACCACCCTGGTGCAGTACCCATTACTTCAGCTCAGGGAGAGGAGCTGAGGAAACTGATTGGAGCTCCTGCCTACATTGAGTGTAGTTCAAAGACACAGCAGAACGTGAAGGCAGTTTTTGATGCGGCCATCAAGGTCGTGCTGCAACCACCCAAGCAAAAGAAAAAGAAGAAAAAGGGCCAAAAGGCTTGTTCCATATTGTGATCAAGAAAATATTAGGGTTATCAAAGTGAAAATGACATGACACCCTTCTTCAGTTCATTCTTTACATTACTTTTCAAGTATATTTTTTCGCTTTCAAT
>JK988693|Panax ginseng||VF-Pa-G-2-4a-T7_L16 Panax ginseng var. Chunpoong cDNA library Panax ginseng cDNA, mRNA sequence.
CATAGGATTTCGGTCCTATTACGTTGGCCTTCGGGATCGGAGTAATGATTAACATGGGAGAGCGGGAGTTCCGATGGAAGTGATGGGATTGATGCTGGGTGAATTTGTGGATGAGTATACAGTTCGTGTGGTGGATGTGTTTGCGATGCCACAGAGTGGTACTGGTGTTAGTGTTGAAGCTGTCGATCATGTTTTTCAGACTAATATGCTGGATATGCTGAAGCAAACGGGGAGGCCCGAGATGGTTGTTGGATGGTACCATTCGCATCCTGGATTTGGCTGTTGGCTTTCTGGTGTAGACATCAATACTCAGCAGAGTTTTGAAGCTCTGAATCAAAGAGCTGTGGCAGTGGTGGTGGATCCAATTCAGAGTGTTAAAGGGAAGGTGGTGATTGATGCCTTTCGATTAATCAACCCACAAACTATGATGCTTGGTCAAGAGCCAAGGCAGACAACATCCAATCTTGGGCATCTCAATAAACCATCTATTCAAGCACTAATCCATGGATTGAACAGGCATTATTACTCGATAGCTATAAATTACAGGAAGAATGAACTTGAGGAGAAGATGTTATTGAACCTTCACAAGAAGAAATGGACTGATGGATTGACACTTCAGCGGTTCGATACACATTCCAAAACTAACGAGCAGACGGTTCAGGAAATGCTAAACCTAGCCATCAAATACAACAAAGCCGTTCAAGAGGAGGATGAGTTGCCACCAGAAAAGCTAGCAATTGCTAATGTGGGAAGGCAAGATGCAAAGAAGCATCTTGAGGAGCATGTCTCCAACTTGATGTCTTCAAACATAATTCAAACCTTGGGTACCATGCTTGACACTGTCGTCTTCTAGAGTTCATTGTGTTGGAGACTGAAGCAATATTATTATGTTGTAGTCACGACTTTTTCCTGTTATCTCTACTATGTA
>JK988642|Panax ginseng||VF-Pa-G-12-2a-T7_C08 Panax ginseng var. Chunpoong cDNA library Panax ginseng cDNA, mRNA sequence.
ATTTCAACACACTCTCTCTCCCCTTCGTCGTTGTAGTCAGCCATGGCTGTTCTGCAATACCTGGATTCACTTCGTAATTCCCATCCGGAGCTCTCCGATTGGTACAATACCCTCGCAGATCTGTACCAGAGGAAGCTATGGCACCAGCTCACTCTCAAGCTCGAACAATTTGTTGCCCTCGCTGTATTCCAGGCTGGTGATGCACTAATACAGCTATATCATAATTTCATCACCGACTTTGAGACTAAAATCAATCTTCTCAAGCTTGCACATTTTGCGGTCATAGTCTCCCAGCAATATTCTGAGAAAGAGGCTGCCAATAGTTATCTTGAAGGGGTGATTGAGAAGCTTCGGGCTACTAGAGAAATGCGCATAGAGGAGCCTGTCCTTTATATTAAGATGCAAATTGCTATGTTCAACCTTGAGAAAGGAGACCAAAAGGAATGCAAGAAACTACTAGAAGATGGGAAAACTACACTTGACAGCATGACTGACATTGATCCGTCTGTCTATGCCAGCTATTATTGGAATTCATCCCAATACCACAAATCTCGTCAGGAGTTTGCAGAGTTCTACAAAAGTGCTCTTCTATATTTAGCATACACCTCAGTAGAGTCCCTGTCAGAATCATTTAAGCTGGATTTGGCTTTTGATTTATCCCTATCTGCATTGCTGGGAGAAAACATTTACAACTTTGGCGAACTGCTTGCGCATCCAATTATAAAGAGTCTTCTGGGAACCAAGGTTGAGTGGCTCTACTACATTCTTGAAGCATTCAACTCTGGTGATTTGGTCCGCTATCAAGAATTATGCCATGTTCATAGTGCTGCTCTGAGCGCGCAACCAGCATTAGTAGAAAATGAGAGAAAGCTTCTGGAAAAGATCAACATTCTCTGCTTAATGGAAATCATCTTCAGTCGACCATC
>JK988627|Panax ginseng||VF-Pa-G-1-1a-T7_M17 Panax ginseng var. Chunpoong cDNA library Panax ginseng cDNA, mRNA sequence.
TGGTTGGCCCTTGGTGTAGCATCGTCAATTGGTCTTGGATCTGGTTTGCATACATTTGTCTTATATTTAGGTCCACATATTGCCTTATTTACAATGAAATCTGTGCATTGTGGCCGCGTTGACATAAAAAGTGCCCCATATGATACCATTCAACTGAGGAGGGGTCCTTCATGGCTTGACAGAGATTGTTCTGAATATGGACCACCAGTGTATTCATCACCTGGTTCACGGGTTCCACTAACTAGCATACTGCATCAGGTTCAGTTAGAAGCTATCATTTGGGGTGTTGGAACTGCACTTGGTGAGCTCCCTCCATATTTCATATCAAGAGCAGCTTGCATATCAGGTAGCAAAGCGGAAGTCATGGAAGATTTGCATTCTTCTGCAAAGGAAGATAGTGGATTCATGGGTAGTCATCTAAAACAGATCAAACAGTGGCTCCTTTCTCACTCTCAACATCTGAACTTCTTCACAATATTGGTTCTTGCTTCGGTGCCAAATCCTCTGTTTGATCTTGCTGGAATCATGTGTGGGCAATTTGGCATCCCATTTTGGAAGTTCTTTTCAGCAACAGTGATTGGAAAGGCAATTGTTAAGACTCACATTCAGACAGCTTTCATTATCTCAGTTTGCAACAATCAACTTCTCGACTTGATAGAGAATGAGTTGATTTTGATGCTCAGCTTTATCCCTGGAATTGCTTCTATCCTGCCCAGCCTCATTGCTAAACTACACATTGCCAAAGAGAAGTACATGACATCCTCGCATCCAGTTTCTTCAAATATTAAGACGGAGAAGTGGGACTTTTCAATTGCTTTGATTTGGAATACTGTTGTGTGGCTGGTGCTCATTAATTTCTCTTTCAAGATCGTGACTGCGACTGCCCAGAGCTTTCTGAAGTAACAGCAGGAAAAGGAGTTGGCTA
>JK988621|Panax ginseng||VF-Pa-G-10-3a-T7_J15 Panax ginseng var. Chunpoong cDNA library Panax ginseng cDNA, mRNA sequence.
CGTGGTGCATACTTAGGTAGGGTTTCGACTGCAGCGGGGAAGATTGGGGGACAAGTTGAGGATGTCACCAAGGTTCTTGAGCAAGCATTCTCTGTTCAGAAGGAGCTTCTTATCAAAATAAAACAATCAAAGAAACCTGACATGGCAGGTTTGGTTGAATTCCTCAAGCCGTTAAATGAAGTGATTATAAAAGCGAATGCGATGACAGAAGGGAGACGATCCAATTTCTTTAATCACTTGAAGACTGTTGCGGACAGTATATCAGCGCTTGCATGGATTGCATATACCGGGAAAGACTGCGGGATGAGCATGCCTATTGCCCATGTGGAAGAAAGTTGGCAAATGGCTGAATTTTACAACAACAAGGTTCTCGTAGAGTATAGAAATAAAGACCCAAATCATATTGAGTGGGCAAAAGCTTTGAAGGAGCTCTATGTTCCAGGCTTGAGGGATTATGTGAAGGCTCACTATCCGTTGGGTCCTGTATGGAGTGCAACAGGGAAAGCTATTGTGTCTGCTCCATCAAAAGCTCCTACAGCAAACGCTCCTGCTCCTCCACCTCCTCCGCCAGCCTCGCTCTTCAGTTCAGAAACTCCTCAGCCTTCATCATCTCGCCCAAAGGCGGGAATGGCTGCTGTTTTTCAAGAAATTAGTTCAGGGAAGCCAGTGACTTCTGGTTTGAAAAAGGTCACAGCCGACATGAAGACAAAGAACCGTGCAGATAGAGCTGGCATTGTTACTGCTAATGAAAAAGATGGTCGTGGCCATTCGTTTTCTTTCTCCAAAACTGCACCTCCCAAGTTAGAGCTTCAAATGGGTCGCAAGTGGGTGGTTGAATACCAAATTGGAAAGAAGAATTTAGTAATTGATGACTGTGATGCGAAACAAACTGTATATGTTTTTGGATGTAAGGATTCTGTTCTTC
>JK988600|Panax ginseng||VF-Pa-G-7-2a-T7_I10 Panax ginseng var. Chunpoong cDNA library Panax ginseng cDNA, mRNA sequence.
GTTCTTCTCCTTTCCTGCGACTCTGAGTTGACAAAATTGGCGGGAACGCTTAAAACACACATCTAGATTTCGCCAAAAATCCGTGAACGATTTTTACGATTCCCGATAGAGAAAGATCCAATTTTTCGAGTGAGAAAATGACAACAACATCACTGGGTTCGTCAACTCTTGCTCAATCACAGGCCAATGGTTTTGGTGGGGGTCTTAAGCTTCAAAAGCCTTCTCTCTCTAATCCTAATTCTCTCACCTTTACCAGGAGAAAATTTCTAACTGCGGTGAAGGCAACTTCTCGGGTTGATAAGTTCTCCAAGAGTGACATCATTGTTTCTCCATCTATTCTATCTGCTAATTTTGCAAAGTTGGGAGAGCAGGTAAAAGCAGTAGATGTTGCAGGTTGTGATTGGATTCATGTTGATGTTATGGACGGTCGTTTTGTCCCAAATATAACTATTGGACCTCTCGTTGTCGATGCCTTGCGCCCAGTGACAGACCTCCCATTAGATGTCCATCTGATGATTGTTGAACCTGAGCAGCGAGTCCCTGATTTCATCAAGGCTGGAGCTGACATAGTCAGCATCCATTGTGAGCAAACTGCCACCATTCATTTGCATCGTACGATTAATCAAATAAAAAGCTTGGGAGCAAAAGCTGGCGTTGTCTTGAACCCTGGTACCCCATTAAGCTCCATAGAATATGTCCTTGATGTTGTTGATCTTGTGTTGATTATGTCGGTCAACCCTGGATTTGGTGGACAGAGCTTTATTGAAAGTCAAGTTAAGAAAATTGCGGACTTAAGAAGAATTTGTGTAGAAAAGGGAGTGAACCCATGGATTGAAGTAGATGGTGGAGTTGGTCCTAGTAATGCATATAAGGTTATTGAAGTTGGAGCTAATGCTTTGGTTGCTGGTTCTGCTGTCTTTGGAG
>JK988566|Panax ginseng||VF-Pa-G-1-2a-T7_N09 Panax ginseng var. Chunpoong cDNA library Panax ginseng cDNA, mRNA sequence.
TTTTTTAGTGAGAGAAGTTTTAGAGGGAGAAATGGGAGGAGAGAATAACTGGAGCATCGGATCAAAGTCATGTGAATCGTGCAAATCAGCCCCGGCGACTCTGTTCTGCCGTGCCGACTCGGCCTTCCTCTGCATGGGCTGCGACGGAAAGATCCACGCCGCGAACAAACTCGCGTCGCGGCACGCGCGCGTGTGGATGTGCGAGGTGTGCGATCAAGCTCCGGCCAGCGTCACGTGCAAGGCGGACGCCGCCGCGCTCTGCGTCACGTGCGACCGTGATATCCACTCCGCCAACCCCCTCGCCCGCCGTCACGAGCGGTTCCCCGTCATTCCGTTTTATGACTCCGCCGCGGCGGCCAAATCAGCCACCGTCCACGGCAGAGACGACCGCTACTTTTCTGATCCGGAGGTGGAGGAGGAGGAGGAGGCCGAGGCTGCGTCGTGGCTACTCCCGAACCCTAACCCTAACACAAATTTCAACAAGATGAATTCGGAGAATTGTCCTGATCTCAAAACGGCTGATTATTTGTTCAAAGATATGGACTCGTATCTGGATATTGATATCATGACAACTGATCAGAAGCCTTTACATCAGCAGAATTACATCTCCGGAAATGCGGATGGAGTTGTCCCGGTACAGAGTAAAACCTGTTACCAAACCCAGCCAAAGACACAGCCTACTTTGGTGGACGGATTTCCTGCCTACGACTTAGATTACACTGGATCGAAGCCTTTTATGTACAACTTCACCTCTCAATCTATCAGCCAAAGTGTATCGTCATCGTCGTTGGAAGTTGACCTAGTTCCAGACCACAATGCCATGGCTGATGAATCGAACAACACTATCGGCCAACATGGAAGCAGCGAAACCCTTCCTAATCCAATCTCCGGACTTGATAGGGAAGCTAGGGTTTTGAGGTAC
>JK988538|Panax ginseng||VF-Pa-G-8-2a-T7_A16 Panax ginseng var. Chunpoong cDNA library Panax ginseng cDNA, mRNA sequence.
GATCAGAACCGACTTGAGGCTAAGGGCGAGGACATCAATGCTAATGATGAAAATGTTAGGATGTTTGGAGATGATTTAAAGGAGGGAGAAAATTACTATTGGAGCAAAAAGAAAGAGGGGATTGCGGCGGTTTTGGAGGACCCGGTGCAGCCGGAGGTGGTTTGGGAGCAGAGACTGAAGGATGTTGAGGCAGAGAGGGGCCGAAAGGCGGTTTCGAGTCCCGGGTTTAGTTTTTCTGCAGCTGGGCTTTTGTTTCCTTATCATCTTGGGGTTGCTCAGTTTCTTATTGAAAAGGGTTATATAAAGGAGGACACACCTTTAGCTGGTTCATCAGCTGGAGCTATTGTCTGTGCAGTGATTGCATCTGGAGCCAGTATGCAACAGGCCTTAGAAGCTACAAAAATATTGGCTGAAGATTGTCGGCTTAAAGGAACTGCATTTCGTCTTGGGGCTGTTCTCAGAGATCTTCTCATAAAATTTCTTCCAGGTGACGTTCATATCCGGTCCAGTGGGAGGGTCCGAGATTCTTTGGAGGCCCAGAGGTTTGTTGGTTGATCAGTTTGACTCTAAAGAAGATCTCATTAATGCAGTCATCACATCTTCCTTTATTCCAGGATATCTTGCACCAAGGCCAGCGACAATGTTCCGGAATCGACTTTGTATAGACGGAGGTTTGACATTGTTTATGCCACCAACATCTGCTGCTAAGACGGTTCGTGTTTGTGCTTTCCCTACCAGTAGCTTGGGATTGCAAGGAATTGGGATTAGCCCAGACTGCAACCCTGAAAATAGGGCTACTCCCAGACAGCTTTTTAATTGGGCACTTGAGCCAGCAGAAGATTCTATTCTTGATAAACTTTTTGAGCTGGGACACCTAGATGCAGCTGTGTGGGCTAAAGATAACCCAGTTGAGGAACTTGT
>JK988535|Panax ginseng||VF-Pa-G-6-4a-T7_H11 Panax ginseng var. Chunpoong cDNA library Panax ginseng cDNA, mRNA sequence.
TATTTTTTAGTGAGAGAAGTTTTAGAGGGAGAAATGGGAGGAGAGAATAACTGGAGCATCGGATCAAAGTCATGTGAATCGTGCAAATCAGCCCCGGCGACTCTGTTCTGCCGTGCCGACTCGGCCTTCCTCTGCATGGGCTGCGACGGAAAGATCCACGCCGCGAACAAACTCGCGTCGCGGCACGCGCGCGTGTGGATGTGCGAGGTGTGCGATCAAGCTCCGGCCAGCGTCACGTGCAAGGCGGACGCCGCCGCGCTCTGCGTCACGTGCGACCGTGATATCCACTCCGCCAACCCCCTCGCCCGCCGTCACGAGCGGTTCCCCGTCATTCCGTTTTATGACTCCGCCGCGGCGGCCAAATCAGCCACCGTCCACGGCAGAGACGACCGCTACTTTTCTGATCCGGAGGTGGAGGAGGAGGAGGAGGCCGAGGCTGCGTCGTGGCTACTCCCGAACCCTAACCCTAACACAAATTTCAACAAGATGAATTCGGAGAATTGTCCTGATCTCAAAACGGCTGATTATTTGTTCAAAGATATGGACTCGTATCTGGATATTGATATCATGACAACTGATCAGAAGCCTTTACATCAGCAGAATTACATCTCCGGAAATGCGGATGGAGTTGTCCCGGTACAGAGTAAAACCTGTTACCAAACCCAGCCACAGACACAGCCTACTTTGGTGGACGGATTTCCTGCCTACGACTTAGATTACACTGGATCGAAGCCTTTTATGTACAACTTCACCTCTCAATCTATCAGCCAAAGTGTATCGTCATCGTCGTTGGAAGTTGACCTAGTTCCAGACCACAATGCCATGGCTGATGAATCGAACAACACTATCGGCCAACATGGAAGCAGCGAAACCCTTCCTAATCCAATCTCCGGACTTGATAGGGGAGCTAGGGTTTTGAG
>JK988505|Panax ginseng||VF-Pa-G-7-1a-T7_K03 Panax ginseng var. Chunpoong cDNA library Panax ginseng cDNA, mRNA sequence.
GGGTATGTGTAAGGCTGAGATCGGCCGACGTATAGCACCGGTGACCGGCGGTAATTTTTATATATGAATTAGGGTTTGTTCGTATCTCACGATGTCAGTTTCGGAAGATGAAGATGAACGGCTGGCTCAATTTCTTGAATCGGAGGTTCTATCCGAGACATCTGAACAGGAAGTGGTGAAGACAGAAAATGAGGAGGAGGTGGAGGAGGAGGGGCCGCAGCATAAGAGGCCATGCGTGGAGGATGAAGCTCATGTGGGTGAGGAAGGGAATTCAACTAGATCTGCTTCCTCAATTCAAGTTCAAGATCCTTCACCGTCAAGGAAGATAAGAATTGTTAGTACTAGTAGTAGTTGTGACGGCGGTGGTATCAACAACAATAGAGAGAATCCTAGGAGGATAGATACCGGGATTTTCAGCAAAGTTCCTCCTGAGCTCTACCATCACATCCTCAAATTTCTGTCCTCCGAGGACCTTGTTGCTTGCTCGCTGGTCTGCAGATTTCTCAGTTTTGCTGCTTCTGATGAAACCCTGTGGCGTCGATTGTATTGCATGCGGTGGGGCCTGCTACAACCTACAAATAAGTTGCGGAATTGTGCTTGGAAAAAGCTTTACATTCAGCGAGATGAAGAAGACATGGTTGAGTTTGTTAGAAATTGCCCCTCTGAGTTCAAAGAGTATTACATCCAAATGCAGACAGCAAAGAGAAGCCAAGCACCTCTTCCTTCTCAGGTGAATGATGACCGGATGATTCTGGATAAGACTGTTGCTGATCAAGTGTCCATATGGAAGCGCAGCAAAGGTTTAGCTGATAAGGTGGCGACTGATCATGCTTGTTCTGGAGAAACTTGTTCTTACTATCAAATAGGGGATGTTTTTGTTTGTGAGAAGACTGGAAATGTTCATGTGTGTGATGATACT
>GW430244|Coffea arabica|coffee|CA00-XX-RT8-088-F07-CC.F Coffea arabica RT8 Coffea arabica cDNA clone CA00-XX-RT8-088-F07-CC, mRNA sequence.
TTCCGTTATTGCTGCTGGATTGGCTGTAGGGCTTGCTTCTATTGGACCCGGAGTTGGTCAAGGAACTGCTGCGGGTCAAGCCGTAGAGGGTATCGCGAGACAGCCCGAGGCAGAGGGAAAAATACGAGGTACTCTATTGCTCAGTCTAGCTTTTATGGAAGCTTTAACAATTTATGGACTGGTTGTAGCATTAGCACTTTTGTTTGCGAATCCTTTTGTTTAATCTTATAAATATAAAAATTATTGACTTGGATTTGTCATTTGCTTTTTCGAATTATAGTAAGATTTCACTCCTACAATTACTTATTCGTTGACAAAATAACCCACGGGAAGGGCTGATTTGCGGATGAGGAATTGGTATACCGACTCGCTTTCATCCTTTCCCGCCCGGAGTCCAAGGGAAACTAAGTATTGGTAGTTCACACAACTCGAATACTTTTC
>GT685193|Coffea arabica|coffee|CA00-XX-PA1-017-D04-EC.F Coffea arabica PA1 Coffea arabica cDNA clone CA00-XX-PA1-017-D04-EC, mRNA sequence.
GGAACTGCTGCGGGTCAAGCCGTAGAGGGTATCGCGAGACAGCCCGAGGCAGAGGGAAAAATACGAGGTACTCTATTGCTCAGTCTAGCTTTTATGGAAGCTTTAACAATTTATGGACTGGTTGTAGCATTAGCACTTTTGTTTGCGAATCCTTTTGTTTAATCTTATAAATATAAAAATTATTGACTTGGATTTGTCATTTGCTTTTTCGAATTATAGTAAGATTTCACTCCTACAATTACTTATTCGTTGACAAAATAACCCACGGGAAGGGCTGATTTGCGGATGAGGAATTGGTATACCGACTCGCTTTCATCCTTTCCCGCCCGGAGTCCAAGGGAAACTAAGTATTGGTAGTTCACACAACTCGAATACTTTTC
>HS076793|Panax ginseng||KYERRC001_09-D11-T3.ab1 Panax ginseng in vitro-cultured adventitious root cDNA library Panax ginseng cDNA, mRNA sequence.
GCACGAGGAGCCTAGCTCTTTCTAAGTATTCCAACTCCGATACTGTAGTTTATGTTGGATGTGGAGAAAGAGGAAATGAAATGGCAGAAGTACTTATGGATTTTCCTCAATTGACAATGACACTACCTGATGGTCGGGAAGAGTCTGTCATGAAACGTACCACACTTGTGGCCAACACTTCAAACATGCCTGTGGCTGCTCGAGAGGCTTCAATTTATACAGGAATTACAATAGCTGAATACTTCAGAGACATGGGCTACAATGTTAGTATGATGGCAGATTCAACATCTCGTTGGGCAGAAGCATTGCGAGAAATTTCAGGTCGATTGGCTGAAATGCCTGCCGATAGTGGATATCCTGCTTATTTGGCAGCACGTTTGGCCTCCTTCTATGAGCGTGCTGGTAAGGTGAAATGTCTAGGTGGGCCAGAACGTAATGGTAGTGTCACAATTGTTGGTGCTGTTTCACCTCCGGGAGGAGATTTTTCAGATCCTGTTACATCTGCTACACTCAGCATTGTTCAGGTTTTCTGGGGTTTAGACAAGAAGCTGGCCCAGAGGAAGCATTTCCCTTCTGTAAACTGGCTTATCTCGTATTCAAAGTATTCAACGGCATTAGAATCCTTTTATGAGAAATTTGATTCAGACTTTATTGACATCAGGACAAAAGCTCGTGAGGTGCTGCAGAGAGAAGATGATCTGAATGAAATCGTCCAACTGGTTGGAAAGGATGCTTTAGCTGAAACAGATAAAATTACTTTAGAGACTGCCAAGCTTTTGAGGGAGGACTATCTTGC
>HS076740|Panax ginseng||KYERRC001_08-G09-T3.ab1 Panax ginseng in vitro-cultured adventitious root cDNA library Panax ginseng cDNA, mRNA sequence.
GCACGAGGGACAATATGGCGTCGAGATTCCCGATACAGGTGATGAGCCCGAGGAAGGTCAATTCTCGTGGCCACACAACAATTAATCCCCACCATAGCTCATTCTCCTGGAGGCGCACGTTAGCATCCGATGACTTTCTTTCCTCCCTCCCCCTCGCCAATTTGTCTCCTCCAGGGCATGTGCAGCCATTATTAGTTACATGTGCTGCCGGGGCAGCGCCTGCGGCAGCAAATCTGGCTCCAGGGACGCCCGTCAGGCCTACCAGCATACTGGTGGTGGGTGCTACCGGAACTCTGGGCAGACAGGTGGTCCGTCGGGCACTAGACGAGGGCTACGACGTCCGCTGCCTAGTTAGGCCTAGACCTGCCCCTGCTGACTTCCTTCGCGACTGGGGTGCTACTGTCGTCAATGCAGACCTAAGCAAACCTGAGACAATACCTGCGACTTTGGTTGGTGTCCATACAGTCATTGACTGTGCTACAGGACGTCCCGAAGAACCCATAAAAACTGTTGATTGGGAAGGAAAAGTTGCTCTGATACAATGTGCGAAAGCAATGGGAATCCAAAAGTTTGTATTCTTTTCCATTCATAACTGTGATAAGCATCCTGAAGTTCCACTGATGGAGATAAAGTACTGCACTGAGAAGTTTCTGCAAGACTCGGGCATAAACCACATAATCATCCGCTTATGTGGTTTTATGCANGGGTTGATTGGGCAATACGCAGTTCCTATACTAGAAGAAAAATCTGTCTGGGGAACAGATGCCCCAACACGAATAGCTTACATGGACACCCAAGATATAGCTCGATTGACATTAATAGCTTTACGAAATGAAAATGTTAATGGGAAACTTCTCACCTTCGCTGGGCCTCGTGCGTGG
>HS076738|Panax ginseng||KYERRC001_08-G07-T3.ab1 Panax ginseng in vitro-cultured adventitious root cDNA library Panax ginseng cDNA, mRNA sequence.
CTTCAAACCAGTACATTCCTTTTGGGCTAAAACCCTAGCTGCACAGTTATTCCTCGATCAATATCTGCTGATTTCAGGTCTGATTCGAAACGATGTCGGACGATGAAAGGGAAGAGAAGGAGCTGGATCTCTCATCTCCTGAAGTTGTTACCAAATACAAGCTCGCCGCTGAGACTGTTAACAAGGCTTTGCAATTAGTATTGTTAGAATGCAAGCCAAAGGCAAAGATTGTTGACATTTGTGAGAAAGGGGATTCATTCATTAGAGAGCAGACCGGAAATATGTACAAGAACGTGAAGAAGAAGATTGAGAAGGGAATTGCATTCCCAACTTGTTTATCTGTAAACAACACAGTGTGTCATTTCTCACCGCTAGCCAGTGATGAGTCTGTGTTGGAAGAAGGTGATGTTTTAAAGATTGATATTGGATGTCACATAGATGGATTCATTGCTGTAGTTGCACACACTCATGTTCTTCACGAAGGGAAAGTGACTGGGAAAGCAGCTGATGTTATTGCTGCAGCAAACACTGCTGCTGAAGTTGCTTTGAGGCTTGTGAGGCCAGGAAAGAAGAACAAAGATGTGACCGAAGCAATTCAGAAGGTTGCTGCTGCCTATGACTGCAAAATTGTTGAAGGTGTTCTTGGTCATCAGCTCAAGCAGTTTGTGATTGATGGAAACAAAGTTGTACTGAGTGTCTCAAACCCTGATACAAGAGTTGATGATGCGGAGTTTGAGGAGAATGAAGTTTATGCAATTGATATAGTGACAAGTACAGGTGATGGAAAGCCCAAGCTGTTGGATGAAAGGCAAACAACAGTCTATAAAAGAGCTGTAGACAAGAACTATCACTTGAAAATGAAAGCATCAAGGTTCATTTTCAGCGAGAT
>HS076708|Panax ginseng||KYERRC001_08-D10-T3.ab1 Panax ginseng in vitro-cultured adventitious root cDNA library Panax ginseng cDNA, mRNA sequence.
GCACGAGGCATCGCTCTTGGCTGCTTCTCTCTAGCGGCTACTGTTTTACAGCAACATGGTTTCTTCAAAGTTATTAGCAATTCATTATGGGTAAGGAAAAGTTTCACATTAACATTGTGGTCATTGGCCATGTGGATTCTGGTAAGTCAACCACCACTGGTCATCTCATCTACAAGCTCGGGGGTATTGACAAACGTGTCATTGAGAGGTTCGAGAAAGAAGCTGCTGAGATGAACAAGCGTTCATTCAAGTATGCGTGGGTGCTTGACAAGCTCAAGGCCGAGCGTGAGCGTGGTATCACTATTGATATTGCTCTGTGGAAGTTTGAGACCACCAAGTACTACTGCACAGTCATTGATGCTCCTGGACATCGTGACTTCATTAAAAACATGATTACTGGAACTTCCCAGGCTGATTGTGCTGTCCTTATCATTGACTCCACTACCGGAGGTTTTGAAGCTGGTATCTCCAAGGATGGGCAGACCCGTGAGCATGCTTTGCTTGCTTTCACCCTTGGTGTCAAACAGATGATCTGTTGCTGCAATAAGATGGATGCGACAACCCCCAAGTACTCCAAGTCTAGGTTCGAAGAAATTGTTAAGGAAGTGTCTTCATATTTAAAGAAGGTGGGATACAACCCTGAAAAGATTGCATTTATCCCCATCTCTGGATTTGAAGGCGACAACATGATTGAGAGGTCTAACAACCTTGATTGGTACAAGGGCCCTACCCTTCTTGAAGCCCTTGACCTGATCACTG
>HS076690|Panax ginseng||KYERRC001_08-C02-T3.ab1 Panax ginseng in vitro-cultured adventitious root cDNA library Panax ginseng cDNA, mRNA sequence.
GCACGAGGCTCCCTTAACACCCTAAATTCCAACTTTTTAGCAGCTCCAACAATCATACCCCCAAGAGGACGCGGTGGTTCCGGCGGCTTCCGTGGCGGCCGTAGCGATGGTGGAGGATTTGGAGGTAGGGGCCGAGGAGGCGGTGGTTTTGGTGGAAGAGGAGCCAGCGATAGAGGAAGGGGGAGAGGCGGACGAGGTGATGGAAGGGGACGAGGCCGCGGTGGCCGCGGTGGGAGAGGCGGTGGAATGAAAGGTGGTAGCAAAGTTGTGGTTGAGCCTCATAGACACGAAGGTGTGTTTATTGCTAAGGGAAAAGAAGATGCTCTTTGTACTAAGAACATGGTTCCTGGTGAAGCTGTGTACAATGAGAAGAGGGTATCCGTTCAGAATGAAGATGGAACTAAGGTTGAGTACAGGGTATGGAATCCCTTCCGTTCTAAGTTGGCGGCTGCCATTCTTGGAGGAGTTGACAACATCTGGATAAAACCTGGTGCTCGGGTTCTGTATCTTGGAGCTGCTTCTGGAACAACCGTCTCTCATGTGTCTGATCTTGTTGGCCCTTCTGGAGTAGTCTATGCTGTTGAATTTTCTCACAGAAGTGGTAGGGACTTGGTTAACATGGCAAAGAAGCGAACTAATGTTATACCTATTATTGAGGATGCTAGGCATCCAGCCAAGTATCGTATGCTTGTTGGGATGGTTGATGTGATATTTTCTGATGTTGCTCAGCCTGATCAGGCAAGAATTTTGGCTTTGAATGCATCGTACTTCTTTGAAGCTGGAGGTCATTTTGTTATATCCATCAAGGCAAAC
>HS076667|Panax ginseng||KYERRC001_07-H12-T3.ab1 Panax ginseng in vitro-cultured adventitious root cDNA library Panax ginseng cDNA, mRNA sequence.
GCACGAGGGCCCTTTAGAGGTCTGTATCAAGAGAGAGAAAGCTCAGATCTGCTGCTTACACAACCTATACTCCGCCGCTGCTAAATTTCTCTCTCCGCTTTAGAGTATGGAGACCTTCCTATTTACCTCTGAATCTGTTAACGAGGGTCACCCAGACAAGCTTTGTGATCAGATCTCCGATGCTGTGCTTGATGCCTGCCTTGCCCAGGACCCCGACAGCAAGGTCGCCTGTGAGACTTGCACCAAGACCAACATGGTCATGGTCTTTGGGGAGATTACTACCAAGGCCGATGTAGACTACGAAAAGATTGTCCGTGAGACATGCCGTACCATTGGATTTGTTTCTGATGATGTGGGTCTTGATGCCGACAACTGCAAGGTCCTTGTAAACATTGAGCAGCAGAGCCCGGATATTGCCCAGGGTGTCCACGGCCACCTTACAAAGCGCCCAGAGGAGATCGGTGCAGGTGACCAGGGCCATATGTTTGGCTATGCCACTGATGAAACCCCTGAACTTATGCCTCTGAGCCACGTCCTTGCAACCAAACTTGGGGCTCGCCTGACTGAGGTTCGAAAGAACGGTACCTGCGCCTGGCTGAGACCTGATGGTAAGACTCAAGTCACTGTTGAGTATTATAACGAGAATGGTGCGATGGTTCCAATTCGTGTTCATACTGTCCTTATCTCCACCCAACACGATGAGACTGTCACGAATGATGAAATTGCTGCCGACCTCAAGGAGCATGTCATTTAGCCTGTGATCCCCGAGAAGTACCTTGATGAGAACACCATCTTCCACCTTAACCCTT
>HS078218|Panax ginseng||KYERRC001_25-A08-T3.ab1 Panax ginseng in vitro-cultured adventitious root cDNA library Panax ginseng cDNA, mRNA sequence.
GCACGAGGCTCCAGTGTTTAGAGAGAGAGGCTCCTCATTCTCTCTATAATTTTTTCCCCTCACCATCTGCCATCACCTCCTCCTCCACTTACTCATACGTTAACTCTCTTTGCTGCAACTTTTTCGTCTACGGCAACAACTGCCCTAACAAACTCCGCCACCACCACCATGAATACACCGCCCATGCCTCTTTTTCTTCCTCAATCGCTAACGGCACTACTTCCGAACGATACTCCCCAAAAACCCTAAACTTCACCACGATTCTAGTGCTACTTCTAGTAGCTTCACCTGTCGTTTCAATACTCGAGCCGAGTCCAACAATGGCGTCGAGCCTCGCCAGTATGATTTTGACCTCTTCACAATCGGCACTGGAAGCGGCGGTGTTAGGGCTTCCCGTTTTGCAGCCAATTTCGGCGCTTCGGTCGCCGTTTTTGAGCTTTCTTTTTGCCACCATTTCTTCGGAGACTACTAGAGGCGTCGGCGGAACTGAAAAAACAAAAAATGTGCTGATTGCAGCTTCTTATATACACCTAAAGCACATAGAACAAATTAAATATACAGCTGAACTTCCTACAGTTAATCCGAGAATTTTGCTTTCTGGTCCTGCAGGATCAGAGATATATCAGGAGATGTTAGCAAAGGCGCTTGCTAGATACTATGGTGCCAAATTGCTTATATTTGATAACTATTCATTTTTGGGTTGAAAGCATTATCTGGAAAGCATTTAGCCCCACAATTATCAACAGTGGGCGTGGTGCTGAATTTGAAGGTGCTGTTATCGCCTTGTTTCATCTGCTAATTACTAGGACAGACAAAGTTCGAGCTCTTCGGAAAGCTTTCTACTG
>HS078217|Panax ginseng||KYERRC001_25-A07-T3.ab1 Panax ginseng in vitro-cultured adventitious root cDNA library Panax ginseng cDNA, mRNA sequence.
GCACGAGGGTTCCTTGTTTGATAAGCTTTTCGGTTGAACTATGGGTAAGGAAAACTTTCACATTAACATTGTGGTTATAGGCCATGTCGACTCTGGAAAGTCTACCACCACAGGTCACTTGATCTACAAGCTTGGTGGTATTGACAAGCGTGTTATTGAAAGGTTTGAGAAGGAGGCTGCTGAAATGAACAAGAGGTCGTTCAAGTATGCCTGGGTGCTTGACAAGCTCAAGGCTGAGCGTGAACGTGGTATTACCATTGATATTGCCTTGTGGAAGTTTGAAACCACCAGGTACTACTGCACGGTCATTGATGCCCCTGGACATCGTGACTTTATCAAGAACATGATTACTGGTACCTCACAGGCTGACTGTGCCGTCCTCATCATTGACTCCACCACTGGTGGTTTTGAAGCTGGTATCTCTAAAGATGGTCAGACCCGTGAGCATGCTTTGCTTGCTTTCACCCTTGGTGTCAAACAAATGATTTGCTGTTGTAACAAGATGGATGCTACCACCCCAAAATACTCTAAAGCAAGGTACGAAGAAATTGTGAAGGAAGTTTCTTCATACTTGAAGAAGGTTGGATACAACCCAGATAAAATTGCTTTTGTCCCCATCTCCGGATTCGAGGGAGACAACATGATTGAGAGGTCCACAAACCTTGACTGGTACAAGGGCCCAACACTCCTCGAGGCCCTTGACTTGATTAATGAACCCAAGAGGCCCTCTGACAAGCCCCTCCGTCTCCCACTTC
>HS078198|Panax ginseng||KYERRC001_24-G12-T3.ab1 Panax ginseng in vitro-cultured adventitious root cDNA library Panax ginseng cDNA, mRNA sequence.
GCACGAGGCCCTTTCTCTAGGTCGGCGAGCGAGAGAAACTATCTACAGTTTCTCGTTTGATAAGCTTTTCGGTTGAACTATGGGTAAGGAAAAGTTTCACATTAACATTGTGGTTATAGGCCATGTCGACTCTGGAAAGTCTACCACCACAGGTCACTTGATCTACAAGCTTGGTGGTATTGACAAGCGTGTTATTGAAAGGTTTGAGAAGGAGGCTGCTGAAATGAACAAGAGGTCGTTCAAGTATGCCTGGGTGCTTGACAAGCTCAAGGCTGAGCGTGAACGTGGTATTACCATTGATATTGCCTTGTGGAAGTTTGAAACCACCAGGTACTACTGCACGGTCATTGATGCCCCTGGACATCGTGACTTTATCAAGAACATGATTACTGGTACCTCACAGGCTGACTGTGCCGTCCTCATCATTGACTCCACCACTGGTGGTTTTGAAGCTGGTATCTCTAAAGATGGTCAGACCCGTGAGCATGCTTTGCTTGCTTTCACCCTTGGTGTCAAACAAATGATTTGCTGTTGTAACAAGATGGATGCTACCACCCCAAAATACTCTAAAGCAAGGTACGAAGAAATTGTGAAGGAAGTTTCTTCATACTTGAAGAAGGTTGGATACAACCCAGATAAAATTGCTTTTGTCCCCATCTCCGGATTCGAGGGAGACAACATGATTGAGAGGTCCACAAACCTTGACTGGTACAAGGGCCCCACACTCCTCGAGGCCCTTGACTTGATTAATGAACCCAAGAGGCCCTCTGA
>HS078150|Panax ginseng||KYERRC001_24-C11-T3.ab1 Panax ginseng in vitro-cultured adventitious root cDNA library Panax ginseng cDNA, mRNA sequence.
GCACGAGGTCTGTTTCAAGAGAGAGAAAGCTCAGATCTGCTGCTTACACAACCTATACTCCGCCGCTGCTAAATTTCTCTCTCCGCTTTAGAGTATGGAGACCTTCCTATTTACCTCTGAATCTGTTAACGAGGGTCACCCAGACAAGCTTTGTGATCAGATCTCCGATGCTGTGCTTGATGCCTGCCTTGCCCAGGACCCCGACAGCAAGGTCGCCTGTGAGACTTGCACCAAGACCAACATGGTCATGGTCTTTGGGGAGATTACTACCAAGGCCGATGTAGACTACGAAAAGATTGTCCGTGAGACATGCCGTACCATTGGATTTGTTTCTGATGATGTGGGTCTTGATGCCGACAACTGCAAGGTCCTTGTAAACATTGAGCAGCAGAGCCCGGATATTGCCCAGGGTGTCCACGGCCACCTTACAAAGCGCCCAGAGGAGATCGGTGCAGGTGACCAGGGCCATATGTTTGGCTATGCCACTGATGAAACCCCTGAACTTATGCCTCTGAGCCACGTCCTTGCAACCAAACTTGGGGCTCGCCTGACTGAGGTTCGAAAGAACGGTACCTGCGCCTGGCTGAGACCTGATGGTAAGACTCAAGTCACTGTTGAGTATTATAACGAGAATGGTGCGATGGTTCCAATTCGTGTTCATACTGTCCTTATCTCCACCCAACACGATGAGACTGTCACGAATGATGAAATTGCTGCCGACCTCAAGGAGCATGTCATTAAGCCTGTGATCCCCGAGAAGTACCTTGATGAGAACACCATC
>HS078146|Panax ginseng||KYERRC001_24-C07-T3.ab1 Panax ginseng in vitro-cultured adventitious root cDNA library Panax ginseng cDNA, mRNA sequence.
GCACGAGGCCCTTATTTCTCGTTTGATAAGCTTTTCGGTTGAACTATGGGTACGGAAAAGTTTCACATTAACATTGTGGTTATAGGCCATGTCGACTCTGGAAAGTCTACCACCACAGGTCACTTGATCTACAAGCTTGGTGGTATTGACAAGCGTGTTATTGAAAGGTTTGAGAAGGAGGCTGCTGAAATGAACAAGAGGTCGTTCAAGTATGCCTGGGTGCTTGACAAGCTCAAGGCTGAGCGTGAACGTGGTATTACCATTGATATTGCCTTGTGGAAGTTTGAAACCACCAGGTACTACTGCACGGTCATTGATGCCCCTGGACATCGTGACTTTATCAAGAACATGATTACTGGTACCTCACAGGCTGACTGTGCCGTCCTCATCATTGACTCCACCACTGGTGGTTTTGAAGCTGGTATCTCTAAAGATGGTCAGACCCGTGAGCATGCTTTGCTTGCTTTCACCCTTGGTGTCAAACAAATGATTTGCTGTTGTAACAAGATGGATGCTACCACCCCAAAATACTCTAAAGCAAGGTACGAAGAAATTGTGAAGGAAGTTTCTTCATACTTGAAGAAGGTTGGATACAACCCAGATAAAATTGCTTTTGTCCCCATCTCCGGATTCGAGGGAGACAACATGATTGAGAGGTCCACAAACCTTGACTGGTACAAGGGCCCAACACTCCTCGAGGCCCTTGACTTGATTAATGAACCCAAGAGGCCCTCTGACAAGCCCCTCCGTCTCCCACTTCAGGATGTGTACAAGATTGGTGGTATTGGAACTGTGCCAGTGGGAAGAGTTGAGACTGGTACTCTCAAGCCAGAATGGTCGTTACCTTTGGCCCTACTGGTCTCACAACTGAAGTTAAGTCTGTTGAGATGCACCACGAGTCGCTTGTTGAGGCTTTACCTGGTGACAATGTTG
>HS078127|Panax ginseng||KYERRC001_24-A12-T3.ab1 Panax ginseng in vitro-cultured adventitious root cDNA library Panax ginseng cDNA, mRNA sequence.
GCACGAGGCCGATCCACACCTGAAGAGCTGGAGAATTTCGGTACTCCGGACTTCACTATATATAATGCTGGACAGTTCCCGTGTAACCGTTATACACACTATATGACATCCTCTACTAGCATAGATTTAAACCTTGGTAGAAGCGAAATGGTCATCCTCGGCACTCAGTACGCCGGGGAAATGAAGAAAGGTCTTTTCAGTGTAATGCACTATCTCATGCCTAAGCGTCAAATCCTCTCCCTTCATTCTGGCTGCAATATGGGCAAAGATGGAGATGTTGCCCTCTTCTTTGGATTGTCAGGTACTGGAAAGACAACTCTGTCTACTGATCACAATCGGTACTTAATTGGAGATGATGAACATTGTTGGAGTGATAATGGCGTGTCAAATATTGAAGGTGGTTGCTATGCTAAGTGTATTGATCTTTCTAGGGAGAAGGAGCCTGATATCTGGAATGCTATCAAGTTTGGGACTGTGTTGGAAAATGTGGTGTTTGATGAACATACAAGAGAGGTGGAATATGAAGAGAAATCAGTCACAGAGAACACTCGTGCTGCTTACCCTATCGAGTACATTCCAAATGCTAAGATCCCATGTGTTGGTCCACATCCAAAGAATGTCATACTTTTAGCATGTGATGCATTTGGTGTTCTCCCACCTGTGAGCAAGCTAAACATGGCACAGACCATGTACCACTTCATCAGCGGCTACACGGCTTTGGTGGCTGGCACTGAGGAAGGTGTGAAGGAGCCACAGGCAACATTCTCTGCCTGCTTTGGTGCAGCTTTTATTATGTTGCATCCTACCAAGTATGCTGCAATGCTCGCTACAAAA
>HS078100|Panax ginseng||KYERRC001_23-G09-T3.ab1 Panax ginseng in vitro-cultured adventitious root cDNA library Panax ginseng cDNA, mRNA sequence.
GCACGAGGTCCATTTCCAAGACCATGGTGGACTGAACCAGACAATGATTTTAGATCCCACAGCCTAATACACTTTCCATGTCTTCACTCCCAACACCGAGAGACTTCTTTTTTATGCTTTCCTTTTCCCACTGGGGCTTGCCCAATACTTGTCTTGTTGTAAGTTTTAAAATTGAGGGAAAGTGAAAGAAAACAACTCAAATTGAGGGTCGTGGTTTCTCTCACCCAAGGCATTTTACTTGCCTATCTTCATTTCTGTTGCTGCAAAAATAGTACTACCATTTAGCAAATGAGGAAACATGGATGGCAGCTTCCCTACCATCCTCTGCAGGTAGTTGCTGTTTCTGTATTTCTGGCATTGGGATTTTCTTTCTATGTGTTCTTTGCCCCTTTTGTGGGGAAACAATTTTATCAGTACATTGTGATGGGACTCTACACTCCATTAATTGCATGTGCCTTTGGGCTCTATATATGGTGTACGGGAGCTGATCCTGCTGATCCAGGAGTTTTCAAGTCCAAAAAGTATCACAACAATCCAGACCACAAAAAGCATGACTGGCTCCGAGAATCTAAACTTGGTGGGGAATCAACGTCATCAATACATGATGCAAATGATGCAACAACTGGAGAGAAACCTATGGATAAAGACATGAAGAACATGGATACAGCAACAGAAGATCATACTACTAAGATTGAAAAGATGGGTGCCCTATCTCGACAATCATCCCGTTTCGTCGCCTTGCTGGCATTTTCTCCTTGTGCTTTTATATGTAACTGCTCAAATCTACATAATGAAACTTCCGAACAACAACAAGTGAAGATGGCATGTTCTACTGCAGTTTGTGTGAAGTTGAGGTTTTCAAGTACAGCAAGCACT
>HS078079|Panax ginseng||KYERRC001_23-E11-T3.ab1 Panax ginseng in vitro-cultured adventitious root cDNA library Panax ginseng cDNA, mRNA sequence.
TGGAATTAGGGTTTTCTTTGGAAAGTTGCAGAAAGCTCTCAAAGCTAGGGGTTTTATTGGGTTAGGACCAGAAATGGCGACTGCAAACCCATTTGATTTGCTCGTCGATGATGATAACGATGACCCATCTCAGCTGATTGCTATTCAGCAGCAAAAGATCGTGCCCAAGAAAGCCGCAGCTCCGGCGGCTGCTCAGCTTGCTAAGCAGCCATCCAAGCCGGCCGCTAAGCTGCCCTCAAAGCCTGCACCTCCAGCTCAGGCTGTGAGAGAGGCAAAGAGTGAAGGTTTCCGCGGGGGAGGACGTGGTGGTGGCCGTGGATATGGGCGTGGTGGAGGCCGTGGATTTAATAGAGACTTTTCCAGCAACGATAATTCTTTTAGCAACAGTGGATCTGCTGGTGGTCAAGGTGCAGTTGAGGAAGCTGATTCTGGGAAAACTTCTGAAAGGCGTGGTGGCTATGGTGGACCTCGCGGTGGATTCCGTGGTGGTCGCCGTGGTGGCTATAGTAATGGAGAAGAGGGAGAAGGGGATCGTGTTCGTAGAGTATTTGAACGTCATAGTGGGACGGGGCGTGGAAATGAATACAAACGTGAAGGATCTGGTCGTGGGAATTGGGGAACTCAGACTGATGAACTTTCTCCGGTGACAGAGGAAGTTGTTAATGAAGGTGAGAAAAATTTGGGTACTGAGAAGCCCTCAGGAGAGGAAGATGCTACAGATGGAAACAAAGAGAAACCAACAAATGAACCTGAAGAAAAGGAGCCAGAGGAGGATAAGGAGATGACACTAGAAGAGTATGAGAAG
>HS078062|Panax ginseng||KYERRC001_23-D06-T3.ab1 Panax ginseng in vitro-cultured adventitious root cDNA library Panax ginseng cDNA, mRNA sequence.
GCACGAGGCCTATTAAACGCTCTCAATATTATCTACATTTTCCTTCAATCTCTAGTTAACTCTTGATTCCTCCTTTCAATTGAAAATGAGAGAGTGCATTTCGATTCACATTGGTCAGGCCGGTATTCAGGTCGGCAACGCCTGCTGGGAACTCTACTGCCTTGAGCATGGCATTCAGCCTGATGGCCAGATGCCGAGTGACAAAACTGTTGGGGGAGGTGATGATGCTTTTAACACATTTTTTAGTGAAACTGGTGCCGGAAAGCATGTTCCTCGTGCAATTTTTGTAGATCTTGAGCCCACTGTGATTGATGAAGTGAGGACTGGAGCATATCGCCAACTCTTTCATCCAGAACAGCTCATCAGCGGCAAAGAAGATGCAGCTAACAACTTTGCCCGTGGCCACTATACCATTGGAAAGGAAATTGTTGACCTTTGCTTGGATCGTATTCGGAAGCTTGCCGACAATTGCACTGGTCTCCAAGGTTTCCTTGTTTTTAATGCTGTTGGTGGAGGCACTGGTTCTGGTCTTGGCTCCCTTCTTTTGGAGCGCCTGTCTGTGGACTATGGCAAAAAATCCAAACTTGGATTCACTGTTTATCCCTCACCCCAAGTCTCAACCTCTGTTGTGGAGCCCTACAACAGTGTGCTCTCAACCCATTCACTTTTGGAACACACTGATGTTTCCGTGCTGCTTGACAATGAAGCCATCTATGATATTTGCAGGCGGTCCCTTGACATCGAGCGCCCCACCTATACCAACCTTAATCGTTTGGTTTCTC
>HS078002|Panax ginseng||KYERRC001_22-G05-T3.ab1 Panax ginseng in vitro-cultured adventitious root cDNA library Panax ginseng cDNA, mRNA sequence.
GCACGAGGCCCTTTCTTTCTCTGGATTATTATTGTTAGTAAGAATAACAAGTAAGAACCGGTCGCATACTCTTCCCGGTTCTCTCTCTTCCTAAAGATCAATGGCATCTCATATTGTTGGTTACCCACGCATGGGCCCCAAGAGGGAGCTCAAGTTTGCTCTTGAATCTTTCTGGGATGGAAAGAGCACAGCTGAGGACTTGCAAAAGGTTGCTGTTGACCTCAGGGCATCCATCTGGAAACAGATGTCTGATGCTGGCATCAAGTACATCCCCAGCAACACTTTCGCATATTATGACCAGGTTCTTGACACAACCGCGATGCTTGGGGCTGTTCCCGCTAGGTACAACTGGAATGGTGGTGAGATTGGATTTGACAATTACTTTTCCATGGCTAGAGGAAATGCCTCTGTCCCTGCTATGGAAATGACCAAGTGGTTTGACACCAACTACCATTACATAGTTCCTGAATTGGGACCTGAGGTGAAGTTCTCTTATGCATCACACAAAGCAGTGACTGAATACAATGAGGCCAAAGCGCTTGGTGTAAATACCGTCCCAGTCCTTGTTGGCCCTGTCAGCTACTTATTGCTATCTAAGCCTGCAAAGGGTGTTGAGAAAACTTTCAATCTTCTCTCCCTTCTTGACAGCATACTTCCAATCTACAAGGAAGTAGTTGCTGAGCTTAAGGCTGCTGGTGCTTCATGGATTCAGTTTGATGAGCCCACTCTTGTGAAGGATCTTGAAGCTCACCAATTGGAAGCATTTACCAAGGCCTACTCCGAACTAGAGTCATCTCTATCTGGTCTTGATGTTCTCATTGAGACCTACTTTGCTGATGTTCCTGCTG
>HS077999|Panax ginseng||KYERRC001_22-G02-T3.ab1 Panax ginseng in vitro-cultured adventitious root cDNA library Panax ginseng cDNA, mRNA sequence.
GCACGAGGCCCTTTCTCTAGGTCGGCGAGCGAGAGAAACTATCTACAGTTTCTCGTTTGATAAGCTTTTCGGTTGAACTATGGGTAAGGAAAAGTTTCACATTAACATTGTGGTTATAGGCCATGTCGACTCTGGAAAGTCTACCACCACAGGTCACTTGATCTACAAGCTTGGTGGTATTGACAAGCGTGTTATTGAAAGGTTTGAGAAGGAGGCTGCTGAAATGAACAAGAGGTCGTTCAAGTATGCCTGGGTGCTTGACAAGCTCAAGGCTGAGCGTGAACGTGGTATTACCATTGATATTGCCTTGTGGAAGTTTGAAACCACCAGGTACTACTGCACGGTCATTGATGCCCCTGGACATCGTGACTTTATCAAGAACATGATTACTGGTACCTCACAGGCTGACTGTGCCGTCCTCATCATTGACTCCACCACTGGTGGTTTTGAAGCTGGTATCTCTAAAGATGGTCAGACCCGTGAGCATGCTTTGCTTGCTTTCACCCTTGGTGTCAAACAAATGATTTGCTGTTGTAACAAGATGGATGCTACCACCCCAAAATACTCTAAAGCAAGGTACGAAGAAATTGTGAAGGAAGTTTCTTCATACTTGAAGAAGGTTGGATACAACCCAGATAAAATTGCTTTTGTCCCCATCTCCGGATTCGAGGGAGACAACATGATTGAGAGGTCCACAAACCTTGACTGGTACAAGGGCCCAACACTCCTCGAGGCCCTTGACTTGATTAATGAACCCAAGAGGCCCTCTGACAAGCCCCTCCGTCTCCCACTTCAGGATGTGTACAAGATTGGTGGT
>HS077992|Panax ginseng||KYERRC001_22-F07-T3.ab1 Panax ginseng in vitro-cultured adventitious root cDNA library Panax ginseng cDNA, mRNA sequence.
GCACGAGGGCTCTTCGGAGGTCTGTATCAAGAGGGGGAAAGTTCAGATCTGCTGTTTACACAACCTATACTCCGCCGCTGCTAAATTTCTCTCTCCGCTTTAGAGTATGGAGACCTTCCTATTTACCTCTGAATCTGTTAACGAGGGTCACCCAGACAAGCTTTGTGATCAGATCTCCGATGCGGTGCTTGATGCCTGCCTAGCCCAGGACCCCGACAGCAAGGTTGCCTGTGAGACTTGCACCAAGACCAACATGGTCATGGTCTTTGGGGAGATTACTACCAAGGCCGATGTAGACTACGAAAAGATTGTCCGTGAGACATGCCGTACCATTGGATTTGTTTCTGATGATGTGGGTCTTGACGCTGACAACTGCAAGGTCCTTGTAAACATTGAGCAGCAGAGCCCTGATATTGCCCAGGGTGTCCACGGCCACCTTACAAAGCGCCCAGAGGAGATCGGTGCAGGTGACCAGGGCCATATGTTTGGCTATGCCACTGATGAAACCCCTGAACTTATGCCTCTGAGCCATGTCCTTGCAACCAAACTTGGGGCTCGCCTGACTGAGGTTCGAAAGAACGGTACCTGCGCCTGGCTGAGACCTGATGGTAAGACTCAAGTCACTGTTGAGTATTATAACGAGAATGGTGCGATGGTTCCAATTCGTGTTCATACTGTCCTTATCTCCACCCAACACGATGAGACTGTCACCAATGATGAAATTGCTGCCGACCTNCAGGAGCATGTCATTAAGCCTGTGATCCCCGAGAAGTACCTTGATGAGAAGACCATCTTCCACCTTAACCCTTCAGGCCGCTTTGTTATTGGCGGCCCTCATGGTGACGCTGGTCTCACCGGG
>HS077972|Panax ginseng||KYERRC001_22-D11-T3.ab1 Panax ginseng in vitro-cultured adventitious root cDNA library Panax ginseng cDNA, mRNA sequence.
GCACGAGGGCCGTTGAGACGAAGTCGGTACCTCACACAGAGCACAGTGTGGAACTAAGGTTGGATGTAGGCTCATCCACTTTCGACTATAGGAGTGAAATTGCTCATGGAAATCCGGGAAAAAAAGAGGTAACTGGTGTTCATCCTGGTGGATCATCTCCCACCAAGTCTCCTGCTTTACCTGTGCAAGAAGCTGAACAGCTTGTGAAGTCTAGTAATTGTAAGGCAGATGGAGCGGAAGATCCTGCATCCAGGCCGAATCTTTCTTCTGTCACTGCTGCAGGGGCTGATACGATGGTGAAGCTGGACTTTGATCTCAATGAAGGTTTGCCGGTTGATGACGGGAGTGCTGGAGAACTTGTTAAATTGCCAGTTTATGGAAACTCATCATCTGTCCATTTACCTTGTCATCTACCTATTTCTATTTCTTCAATGCCTGGGAGCCTCCCTTCTTCAATTACTGTTGCTGCTGCTGCCAAAGGTCCAGTTGTCCCTCCTGAGAACCCATTGCGAATAAAGGGAGAACTAGGGTGGAAAGGGTCTGCAGCTACCAGTGCGTTTCGGCCGGCAGAGCCTAGAAAGATTCTGGACATGCCACTCAGTACAACCAGTTCCCCTCTTGTTGATAACTCTTCTAGCAAACATGGTCGCCCTCTTTTGGACTTTGATTTGAATGTTCCCGATCAGAGGGCACTGGAGGATGTGGCTCCTCAAAACTCCGTAAAGGTAACACGTTCGGAATCTGGTCATGAACGTAGTGGTGGTGGACTTTATCTTGATTTGAACAGATGTGA
>HS077942|Panax ginseng||KYERRC001_22-B05-T3.ab1 Panax ginseng in vitro-cultured adventitious root cDNA library Panax ginseng cDNA, mRNA sequence.
GCACGAGGACCATTTACAGTTTTTCGTTTGCTAAGCTTTTCGGTTGAACTATGCGGTAAGGAAAAGTTTCACATTAACATTGTGGTTATAGGCCATGTCGACTCTGGAAAGTCGACCACCACAGGTCACTTGATCTACAAACTTGGTGGTATTGACAAGCGTGTTATTGAAAGGTTTGAGAAGGAGGCTGCTGAGATGAACAAGAGGTCGTTCAAGTATGCTTGGGTGCTTGACAAGCTCAAGGCTGAGCGTGAACGTGGTATTACCATTGATATTGCCTTGTGGAAGTTTGAAACCACCAGGTACTACTGCACAGTCATTGATGCCCCTGGACATCGTGACTTTATCAAGAACATGATTACTGGTACCTCACAGGCTGACTGTGCTGTCCTCATCATTGACTCCACCACTGGTGGTTTTGAAGCTGGTATCTCTAAAGATGGTCAGACCCGTGAGCATGCTTTACTTGCTTTCACCCTTGGTGTCAAACAAATGATTTGCTGTTGTAACAAGATGGATGCCACCACCCCAAAATACTCTAAAGCAAGGTACGAAGAAATTGTGAAGGAAGTTTCTTCATACTTGAAGAAGGTTGGATACAACCCAGAAAAAATTGCTTTTGTCCCCATCTCCGGTTTCGAGGGAGACAACATGATTGAGAGGTCCACAAACCTTGACTGGTACAAGGGCCCAACGCTCCTCGAGGCCCTTGACTTGATTAATGAACCCAAGAGGCCCTCTGACAAGCCCCTCCGTCTCCCACTTCAGGATGTGTACAAGATTGGTGGTATTGGAACTGTGGCAGTGGGAAGAGTCGAGACTGGTACTCTCAAGCCAGGAA
>HS077924|Panax ginseng||KYERRC001_21-H11-T3.ab1 Panax ginseng in vitro-cultured adventitious root cDNA library Panax ginseng cDNA, mRNA sequence.
GCACGAGGACTCTTCCCGCTCTGTTCTGTCGCTACCTTCCGGTCGGATCTTCTCCTTTCTCGCCAAACCATGAGCATGACCTTTGGACCAAATATTGAGCTGTCAAGATGCACTGCAACATCGATTAGACCTTGTCCGATATCAGACACATCTGTGGCAAATTTACCTATGCCCGTGCACTGTTGCTTCTCAAATAGGGGTTCTGCAATTTCATTGGTTTCTAGAGAAGTTGAATGTAGAAGATCTAGAAAGGGTAGCATTATCTACTCTATGTCAAGAAGCAATGAGGATGGCAGCAACGAGAATGATAAGCTTACATATAAAAGTGCTGGTGTTGACATAGATGCTGGATCAGAGCTTGTTAGGAGAATTGCGAAAATGGCCCCTGGAATTGGAGGCTTTGGTGGACTGTATCCTTTTGGGGATTCCTATCTTGTGGCCGGTACAGATGGTGTGGGAACTAAACTTAAACTGGCATTTGAAACTGGAATTCATGACACTATTGGGATTGATCTGGTTGCAATGAGTGTCAATGACATTGTTACTTCTGGTGCAAAGCCTTTATTTTTCCTTGATTACTACGCAACAAGTCGTCTTGATGTTGATCTTGCTGAAAAGGTTATAAAAGGCATTGTAGATGGTTGCCAGCAATCTGAATGCGCACTTTTAGGAGGAGAGACTGCAGAAATGCCAGATTTCTATGCAGATGGTGAGTATGACCTTAGTGGTTTTGCGGTTGGCAGTGTAAAAAAGGATTCAGTTATCAATGGGGAAAATATTGTGGTCGG
>HS077916|Panax ginseng||KYERRC001_21-H03-T3.ab1 Panax ginseng in vitro-cultured adventitious root cDNA library Panax ginseng cDNA, mRNA sequence.
GCACGAGGCCCATATCTGCTGCTTACCAACCTATACTCCGCCGCTGCTAAATTTCTCTCTCCGCTTTAGAGTATGGAGACCTTCCTATTTACCTCTGAATCTGTTAACGAGGGTCACCCAGACAAGCTTTGTGATCAGATCTCCGATGCTGTGCTTGATGCCTGCCTTGCCCAGGACCCCGACAGCAAGGTCGCCTGTGAGACTTGCACCAAGACCAACATGGTCATGGTCTTTGGGGAGATTACTACCAAGGCCGATGTAGACTACGAAAAGATTGTCCGTGAGACATGCCGTACCATTGGATTTGTTTCTGATGATGTGGGTCTTGATGCCGACAACTGCAAGGTCCTTGTAAACATTGAGCAGCAGAGCCCGGATATTGCCCAGGGTGTCCACGGCCACCTTACAAAGCGCCCAGAGGAGATCGGTGCAGGTGACCAGGGCCATATGTTTGGCTATGCCACTGATGAAACCCCTGAACTTATGCCTCTGAGCCACGTCCTTGCAACCAAACTTGGGGCTCGCCTGACTGAGGTTCGAAAGAACGGTACCTGCGCCTGGCTGAGACCTGATGGTAAGACTCAAGTCACTGTTGAGTATTATAACGAGAATGGTGCGATGGTTCCAATTCGTGTTCATACTGTCCTTATCTCCACCCAACACGATGAGACTGTCACGAATGATGAAATTGCTGCCGACCTCAAGGAGCATGTCATTAAGCCTGTGATCCCCGAGAAGTACCTTGATGAGAACACCATCTTCCACCTTAACCCTTCAGGCCGCTTTGTCATTGGC
>HS077910|Panax ginseng||KYERRC001_21-G09-T3.ab1 Panax ginseng in vitro-cultured adventitious root cDNA library Panax ginseng cDNA, mRNA sequence.
GCACGAGGCATCTTCATCTCTTCTTCTTTCGAGTCCAAATCTCCCAACTCCCTCTCCTCCTCTCTCGCTAATGGGGGCTTTAAGGCTGCCCTCTCTCTCCTCAATAATCGCCACCTCCTCCGCCGCGCGTGCTCCTTCGATTTTCCACCGGAATCGCCTCCGGCTTCCTCTATGGAGGTGCTCAGCCGCCAATATATCCACCGAGAAATTGGCTGAGCCGGAGATCGAAGAGCGTCGCGAAAGTAAAAAGGCGGGAGTAATAGCGCCTCGGTCTCATGATTTTAATGCTTGGTACCTTGATATCATCGCCAATGCTGAGCTCGCTGATTACGGCCCTGTTCGCGGTACTATGGTTATTCGACCGTACGGTTACGCCATTTGGGAAGCAATTCAGGTGTATTTAAATATTAAGTTCAAGGAGACCGGTCATAGTAACATGTATTTCCCCCAGTTGATACCATACTCATTCATAAAGAAAGAAGCTAGCCATGTTGAGGGATTTAGTCCAGAATTAGCCATCGTCACTATTGGAGGAGGAAAGGAACTTGAGGAAAAACTTGTGGTTCTGCCAGGTTCGACCTACTAGTGAAACCATTGTAAATCACATGTTTACTCAGTGGATTCATAGTTATCGTGATCTCCCTCTCATGGTCAACCAGTGGGCAAATGTCACAAGATGGGAGATGCGCACGAAACCATTCGTGAGGACTCTCGAATTTCTTTGGCAGGAGGGGCATACTGCTCATGCCACTCCTGAGGAGGC
>HS077890|Panax ginseng||KYERRC001_21-F01-T3.ab1 Panax ginseng in vitro-cultured adventitious root cDNA library Panax ginseng cDNA, mRNA sequence.
GCACGAGGTTTATTTCCAATGGACAGTACCATGGCTTCCCATACACTGGTCGCTATGGATCTATCATTAATTCATATCAGCCCCCCCATCATCATCATCATCATGTCGGATCAGCTCCATCTGGAATTCCTTTTGAAAGGCACTTTAGTCATTATCAGGAGTCCTCAGATACGTTATTCAGGAGTCCTCCTGCTTTTGGAGGAATGGGTTTAGGTCACAATGACAGGAGTTTTATGGGTCCTCGTGGTTCTGTGAATACAGTCTTTCCAGAAAATGGTTCCCCAAGTTTCAGCATGATGTCTTCCCCAAGGCCGAGTCCTATGTTCCTTGGAAATGGCCATTACCCAGGACTGGCACCCATCAACATGGATGGTTTTACTGAGCGTGGAAGGAGCCGACGTGTTGAGCACAGTGCAAGTCAAATAGATAACAAGAAGCAGTTTCAACTTGATCTGGACAAAATTTTAAATGGGGAGGATTCAAGGACAACTTTAATGATTAAAAATATCCCTAATAAGTACACCTCAAAGATGTTGTTGGCTGCCATTGACGAAAATCACAGGGGTACTTATGATTTTCTCTATCTGCCAATTGATTTTAAGAATAAATGCAACGTTGGCTATGCGTTTATCAACATGCTGTCTCCATCGCATATTATCCCATTCTACCAGGCATTTAATGGGAAGAAGTGGGAGAAGTTCAATAGTGAGAAAGTTGCTTCATTGGCATATGCTCGAATCCAGGGAAAGATGGCCCTTGTCACCCACTTCCAGAATTCAAGCTTGATGAATGAAGATAAGCGCTGCCGACCTATTCTTTTT
>HS077866|Panax ginseng||KYERRC001_21-C12-T3.ab1 Panax ginseng in vitro-cultured adventitious root cDNA library Panax ginseng cDNA, mRNA sequence.
GCACGAGGACCTTTCTCTGGATTATTATTGTTAGTAAGAAAAACAAGTAAGAACCGGTCGCATACTCTTCCCGGTTCTCTCTCTTCCTAAAGATCAATGGCATCTCATATTGTTGGTTACCCACGCATGGGCCCCAAGAGGGAGCTCAAATTTGCTCTTGAATCTTTCTGGGATGGAAAGAGCACAGCTGAGGACTTGCAAAAGGTTGCTGCTGACCTCAGGGCATCCATCTGGAAACAGATGTCTGATGCTGGCATCAAGTACATCCCCAGCAACACTTTCGCATATTATGACCAGGTTCTTGACACAACCGCGATGCTTGGGGCTGTTCCTGCTAGGTACAACTGGAATGGTGGTGAGATTGGATTTGACAATTACTTTTCCATGGCTAGAGGAAATGCCTCTGTCCCTGCTATGGAAATGACCAAGTGGTTTGACACCAACTACCATTACATAGTTCCTGAATTGGGACCTGAGGTGAAGTTCTCTTATGCATCACACAAAGCAGTGACTGAATACAATGAGGCCAAGGCGCTTGGTGTAAATACCGTCCCAGTCCTTGTTGGCCCTGTCAGCTACTTATTGCTATCTAAGCCTGCAAAGGGTGTTGAGAAAACTTTCAATCTTCTCTCCCTTCTTGACAGCATACTTCCAATCTACAAGGAAGTAATTGCTGAGCTTAAGGCTGCTGGTGCTTCATGGATTCAGTTTGATGAGCCCACTCTTGTGAAGGATCTTGAAGCTCACCAATTGGAAGCATTTACCAAGGCCTACTCCGAACTAGAGTCATCTCTATCTGGTCTTGATGTTCTCATTGAAACTACTTTGCTGATGT
>HS077827|Panax ginseng||KYERRC001_20-H08-T3.ab1 Panax ginseng in vitro-cultured adventitious root cDNA library Panax ginseng cDNA, mRNA sequence.
GCACGAGGCTCCATTCCTCATAGCACTTGGCTGCTTCTCTCTAGCGGCTACTGTTTTACAGCAAAAAGGTTTCTTCAAAGTTATTAGCAATTCATTATGGGTAAGGAAAAGTTTCACATTAACATTGTGGTCATTGGCCATGTGGATTCTGGTAAGTCAACCACCACTGGTCATCTCATCTACAAGCTCGGGGGTATTGACAAACGTGTCATTGAGAGGTTCGAGAAAGAAGCTGCTGAGATGAACAAGCGTTCATTCAAGTATGCGTGGGTGCTTGACAAGCTCAAGGCCGAGCGTGAGCGTGGTATCACTATTGATATTGCTCTGTGGAAGTTTGAGACCACCAAGTACTACTGCACAGTCATTGATGCTCCTGGACATCGTGACTTCATTAAAAACATGATTACTGGAACTTCCCAGGCTGATTGTGCTGTCCTTATCATTGACTCCACTACCGGAGGTTTTGAAGCTGGTATCTCCAAGGATGGGCAGACCCGTGAGCATGCTTTGCTTGCTTTCACCCTTGGTGTCAAACAGATGATCTGTTGCTGCAATAAGATGGATGCGACAACCCCCAAGTACTCCAAGTCTAGGTTCGAAGAAATTGTTAAGGAAGTGTCTTCATATTTAAAGAAGGTGGGATACAACCCTGAAAAGATTGCATTTATCCCCATCTCTGGATTTGAAGGCGACAACATGATTGAGAGGTCTAACAACCTTGATTGGTACAAGGGCCCTACCCTTCTTGAAGCCCTTGACCTGATCACTGAGCCCCAGAGACCCTCCGATAAGCCCCTTCGTCTCCCTCTCCAGGATGTTTAC
>HS077813|Panax ginseng||KYERRC001_20-G06-T3.ab1 Panax ginseng in vitro-cultured adventitious root cDNA library Panax ginseng cDNA, mRNA sequence.
GCACGAGGGTCCCTTTTTAGAATTCAATCAATATCAGTTGCTTTAATTATGGATGCCGGAAATTCAAATGAAGGAGAATCAAGAGTACCATTGTTGGCAAACAATGATGCCATGAGAAATGACCGGCCCGTTTACCCAATATTTACCTCTGTACCAGCTTTAAACGAAGCTGCTTCTCTACTTGCGGAGACAACTTCCTATCTAAGCCAATGTTTCCCTGATTTTTTAGCAGAGCCTGTTTCTAGAGACTCCAATGGACTCGAAATGTCAACATTTGCTTCTGGGAATACCAGAGCATCTTTGGCTAGCAATGATGTGTCCTCAAGTGGAAGCCTTTCTGCACTTTCTGGATCATCTCATATAGCAACTGATGCACCAGTTATTCATGATAGAACAATGCAGAGCTTAATCAGAGATTCATCTCAAAACGCTAATTCGATTGTGCAAGCATCTTCAAGTGGCAATTCAATGTTTCAAGGGCTTATTCAGCGGGTACAAAGGACTGTTCGTGGCTCTGCGGATGACATTGGATGGCTTAAACGTGCTTCAGAGATGCCTCCTGTTTTTCATGGAACTGAAAGGTTTATGGAAATTCTTGACGAAATCAGGCATGGTGTACACAGGTTACCCAACTCAATGGTCTACTTGCTGGTTCCAGGTCTTTTCAGCAATCATGGACCACTTTACTTCGTTAGTACTAAAACAAGTTTTTCAAAGATCGGTCTAACATGTCATATTGCAAAGATTCATAGCGAGGCTTCTGTTGAAAAAAATGCCAGAGAGATAAAAGAGTATATCGAGGAAATCTATTGGGGTTCTGGGAAACGTGTATTACTTC
>HS077804|Panax ginseng||KYERRC001_20-F09-T3.ab1 Panax ginseng in vitro-cultured adventitious root cDNA library Panax ginseng cDNA, mRNA sequence.
GCACGAGGCTCCCTTTCTCTCTTCAAAGCACAGAGGTTCACTTTCTCTCTGTAAACCGCCCAACTCTCCTTTCTCTCTCTCCAAACCCTTCAATACCTCTCCACTACAATCAGAGCTCCGCTTTTGCTCTAAATTTCCCAATTTCTCACCACCGAATCAAGTTCACATCCGCAATGAATTCAACATCCTCTCTTTCTAATGGAATTGAAACCTCCGTTAGCTTAGATTTTGAAGATTAGGAGCTAGACGGGTTCGCCGCTGTCGAAAATAAGGTGGATGACGCCGCCGGGAAGGCGACAATGATCTAGATCGATAAGATTCTTCGCTATTTCAAGAATTCAATAAGTGATCTGAAAAAGATGGCTAAGGAAGTGGCTAATGGATCTACAAAATCCCCTCTAACTCCTTCTCCGCTGCATACTGCCAAAATTTTTCAGGCTGAGCTGAATTGGGATATTAGTTTCAATGCCCACCATGCGATTGATCAGGGTCGTCAATGGGAGGCATTCCACTGTCACTAAAAAGAATAGAGAATGGCAAGAGAAATTACCTATACAGTATTCAAAGTTGAAGAAATCATGTACTCTAAAGCCAATTCCAAGGTTGAATACATGGATCTTGAAACACTGTGGGACAGGGCTAATGAGGCCATTAATATCACAATTCGGAGAGACAAGAGTACAGAATCCAAAGAACTGTTGTCGCCATGTGTTGAAGATATCATGCTCTATGATGTAACTGTCGAGGCCGACCCTGACTTTGATAGTTATGAACGTACTTGGCATCCAGTTTTCGTTGATACGAATGCTCCATCCCAAAG
>HS077788|Panax ginseng||KYERRC001_20-E05-T3.ab1 Panax ginseng in vitro-cultured adventitious root cDNA library Panax ginseng cDNA, mRNA sequence.
GCACGAGGTCTCTCTTTAGGTCGGCGAGCGAGAGAAACTATCTACAGTTTTTCGTTTGCTAAGCTTTTCGGTTGAACTATGGGTAAGGAAAAGTTTCACATTAACATTGTGGTTATAGGCCATGTCGACTCTGGAAAGTCGACCACCACAGGTCACTTGATCTACAAACTTGGTGGTATTGACAAGCGTGTTATTGAAAGGTTTGAGAAGGAGGCTGCTGAGATGAACAAGAGGTCGTTCAAGTATGCTTGGGTGCTTGACAAGCTCAAGGCTGAGCGTGAACGTGGTATTACCATTGATATTGCCTTGTGGAAGTTTGAAACCACCAGGTACTACTGCACAGTCATTGATGCCCCTGGACATCGTGACTTTATCAAGAACATGATTACTGGTACCTCACAGGCTGACTGTGCTGTCCTCATCATTGACTCCACCACTGGTGGTTTTGAAGCTGGTATCTCTAAAGATGGTCAGACCCGTGAGCATGCTTTACTTGCTTTCACCCTTGGTGTCAAACAAATGATTTGCTGTTGTAACAAGATGGATGCCACCACCCCAAAATACTCTAAAGCAAGGTACGAAGAAATTGTGAAGGAAGTTTCTTCATACTTGAAGAAGGTTGGATACAACCCAGAAAAAATTGCTTTTGTCCCCATCTCCGGTTTCGAGGGAGACAACATGATTGAGAGGTCCACAAACCTTGACTGGTACAAGGGCCCAACGCTCCTCGAGGCCCTTGACTTGATTAATGAACCCAAGAGGCCCTCTGACAAGCCCCTCCGTCTCCCACTTCAGGATGTGTACAAGATTGGTGGTATTGGAACTGTGC
>HS077783|Panax ginseng||KYERRC001_20-D12-T3.ab1 Panax ginseng in vitro-cultured adventitious root cDNA library Panax ginseng cDNA, mRNA sequence.
GCACGAGGTTCCTTTTTGAAGCTCACTCTGGTCTTGCGGAGTACAGAAGAAACAAGCTACTAGAAATAAGCAATCGAATCAATTCATATCAAATGGCTCTACCAAATCAACAAACTGTTGACTATCCGAGCTTTAAGCTTGTGATTGTTGGTGATGGAGGAACTGGGAAAACAACTTTTGTGAAGAGGCACCTCACTGGTGAATTTGAGAAGAAATATGAGCCCACCATCGGAGTTGAAGTTCACCCATTGGACTTCTTCACAAACTGTGGGAAAATTCGTTTCTATTGCTGGGATACGGCTGGGCAAGAGAAGTTTGGTGGTCTACGAGATGGTTACTACATTCATGGGCAATGTGCAATCATAATGTTTGATGTTACTGCGCGGTTAACCTACAAGAATGTTCCAACATGGCATCGCGATCTATGCCGGGTTTGTGAAAATATACCCATTGTTCTTTGTGGAAACAAGGTTGATGTGAAGAACAGGCAGGTTAAGGCAAAGCAGGTTACATTCCACAGGAAGAAAAACTTGCAGTACTATGAGATTTCGGCTAAAAGCAACTACAATTTTGAGAAACCATTCTTGTACCTTGCCAGGAAGCTTGCTGGGGATGCCAATCTTCATTTTGTTGAGTCACCTGCACTCGCTCCTCCAGAGGTCCAGATTGACTTGGCTGCTCAGCTACAGCATGAAGCTGACCTTGCTGCTGCTGCTAGTCAGCCACTTCCTGATGATGATGATGATGCATTCGATTAGAGGGATATC
>HS077721|Panax ginseng||KYERRC001_19-G10-T3.ab1 Panax ginseng in vitro-cultured adventitious root cDNA library Panax ginseng cDNA, mRNA sequence.
GCACGAGGCGACACTTCAACAACGACAACGAATCAGAACGACCGGAGATATTAGGGCCCAGACTGTAATAATTCTCAAGCCTGCCAGCTGAGAATTCAAATTCTTCAGATCTCTGCATCAGCAATTTTCAAAACCTAGCTTGATCCACTCCAATTTCAACTGCAACCTCCACCAAATTCAGGACTAAGGGGTGCCCAGTAAGTATCTTTGGTTGATTTGGTAGTATGTTGCATGCTCGGGGGACTATCGAGGAACAGTTGATTTTGAAAGCAATCAAGGAAGAATGCCATTGGGAGAGTCTTCCAAAGCGACTTCAGGCCACTTTGAATTCCAAGGATGAATGGCATAGAACGATAATTGAGCATTGTATAAAGAAAAGGCTCCAATGGAACACTTCTTTTGTTCGCAAGGTATACAAAGAAGGTGAATATTATGAAGATATGATGCGTTACTTGCGAAAGAATTTAGCGCTGTTTCCCTATCACCTTGCGGAGTATGTTTGCCGTGTAATGCGGTTGTCTCCATTCAGATACTATTGTGACATGATATTCGAAGTCATGAAAAATGAGCAACCTTATGACAGCATCCCAAATTTTAGCGCGGCAGATGCTTTGCGGCTTACGGGGATAGGTAGAAATGAATTTATTGACATCATGAACAAGTGCAGATCTAAGAAAATCATGTGGAAGCTAAACAAGTCAATTGCTAAAGAACTATTGCCGACACAACCTGTGGACTTTCAGATCGAGCCATGGTGGGGAAGTTGGTTTGGTCAACTTTACACT
>HS077710|Panax ginseng||KYERRC001_19-F11-T3.ab1 Panax ginseng in vitro-cultured adventitious root cDNA library Panax ginseng cDNA, mRNA sequence.
GCACGAGGCACCAGTTCTCTCTGGATCTCTCATCTTTCTATCCTCTATTTCTTTCTCACACAGACACACTTGTAGTTGCCGAGCAATTTGATCGAAGATCTTTTTACCCGAGTATTCCATTCGTCCACTTTGATCTTTTCATCAAACGGATTGTTTCTAATCTGTTAAAATGCCTCTCAGACTTGAAATCAAGAGAAAACTTGCTCAGAGGTCAGAAAGGGTAAAATCTGTGGATCTACATCCAACTGAGCCATGGATTCTGGCAAGTTTATATTCGGGTACTGTTTGCATATGGAACTACCAGTCTCAGACTATGGCGAAATCGTTTGAGGTGACTGAGTTACCAGTTAGATCAGCTAAGTTTATACCACGCAAGCAGTGGGTTGTTGCTGGTGCAGATGACATGTTCATCCGTGTATACAATTACAATACAATGGATAAGGTTAAAGTTTTTGAGGCACACACAGATTATATTAGGTGTGTGGCTGTTCATCCTACCCTTCCATATGTCCTGTCATCAGCTGATGACATGCTTATAAAGCTTTGGGACTGGGAGAAGGGCTGGATGTGTACTCAAATTTTTGAGGGTCATTCCCATTATGTAATGCAAGTGACATTTAATCCAAAAGACACCAATACTTTTGCTAGTACATCCCTTGATCGTACCATAAAGATTTGGAATCTTGGCTCTCCTGATCCAAACTTCACGTTAGATGCCCATCTGAAAGGGGTCAACTGTGTAGATTATTTCACTGGCGGTGATAAACCTTATCTCATCACTGGTTCTGATGATCACACTGCTA
>HS077671|Panax ginseng||KYERRC001_19-C07-T3.ab1 Panax ginseng in vitro-cultured adventitious root cDNA library Panax ginseng cDNA, mRNA sequence.
GCACGAGGCTCCCCTTTCGGTGCTAGGGTTTTGAGTTTGAAATTCGTTGCGCTGCTACTTGCTTCATTATGGGTAAGGAGAAGGTTCACATCAACATTGTGGTCATTGGCCATGTGGATTCTGGAAAGTCAACCACCACTGGTCATCTCATCTATAAGCTGGGAGGTATTGACAAAAGGGTGATTGAGAGGTTTGAGAAGGAAGCTGCTGAAATGAACAAGCGTTCATTCAAGTATGCCTGGGTTCTTGACAAGCTCAAGGCTGAGCGTGAGCGCGGTATCACCATTGATATTGCTCTGTGGAAGTTTGAGACCACCAAGTACTACTGCACTGTCATTGATGCCCCTGGACATCGTGATTTCATCAAGAATATGATTACTGGAACTTCCCAGGCAGACTGTGCTGTGCTTATCATTGACTCCACCACTGGAGGTTTTGAAGCTGGTATCTCAAAGGATGGGCAGACCCGTGAACATGCCTTGCTTGCTTTCACACTTGGTGTCAAGCAGATGATCTGTTGCTGCAATAAGATGGATACCACAACTCCCAAGTACTCCAAGGGTAGGTACGAAGAAATTGTGAAGGAGGTGTCATCCTATTTGAAGAAGGTGGGATACAACCCTGATAAGATTGCCTTTATTCCCATCTCTGGGTTTGAAGGCGATAACATGATTGAGAGGTCTACAAACCTTGACTGGTACAAGGGTCCTACCCTACTTGAAGCCCTTGACCAGATCACTGAGCCCAAGAGGCCCTCAGACAAGCCCCTTCGTCTCCCTCTCCAGAATGTGTACAAGATCGGTGGTATTGGAACCGTGCCAGTG
>HS077642|Panax ginseng||KYERRC001_19-A02-T3.ab1 Panax ginseng in vitro-cultured adventitious root cDNA library Panax ginseng cDNA, mRNA sequence.
GCACGAGGCTCCCCTTTCGGTGCTAGGGTTTTGAGTTTGAAATTCGTTGCGCTGCTACTTGCTTCATTATGGGTAAGGAGAAGGTTCACATCAACATTGTGGTCATTGGCCATGTGGATTCTGGAAAGTCAACCACCACTGGTCATCTCATCTATAAGCTGGGAGGTATTGACAAAAGGGTGATTGAGAGGTTTGAGAAGGAAGCTGCTGAAATGAACAAGCGTTCATTCAAGTATGCCTGGGTTCTTGACAAGCTCAAGGCTGAGCGTGAGCGCGGTATCACCATTGATATTGCTCTGTGGAAGTTTGAGACCACCAAGTACTACTGCACTGTCATTGATGCCCCTGGACATCGTGATTTCATTAAGAATATGATTACTGGAACTTCCCAGGCAGACTGTGCTGTGCTTATCATTGACTCCACCACTGGAGGTTTTGAAGCTGGTATCTCAAAGGATGGGCAGACCCGTGAACATGCCTTGCTTGCTTTCACACTTGGTGTCAAGCAGATGATCTGTTGCTGCAATAAGATGGATACCACAACTCCCAAGTACTCCAAGGGTAGGTACGAAGAAATTGTGAAGGAGGTGTCATCCTATTTGAAGAAGGTGGGATACAACCCTGATAAGATTGCCTTTATTCCCATCTCTGGGTTTGAAGGCGATAACATGATTGAGAGGTCTACAAACCTTGACTGGTACAGGGTCCTACCCTACTTGAAGCCCTTGACCAGATCACTGAGCCCA
>HS077560|Panax ginseng||KYERRC001_18-A09-T3.ab1 Panax ginseng in vitro-cultured adventitious root cDNA library Panax ginseng cDNA, mRNA sequence.
GCACGAGGAGCTCTTAAAAATAATGGGCGAGTGTCTGCTGATGTTAGTTACATGTTTGTCACTGGCGTGGCATGGATATTTCTTTAACTTAACATTCCTAGAACTGATGTTTACCTTTATGATTCCAGCATGCATGAGACTATAGAACGCTATCGCCAACACACCAAAGATGTTCAAAGTAACAACAACACACCAGTGGTACACAACATGCAGCATTTGAAGCATGAAACAGCGAGTTTGGCAAAGAAGATAGAGCTTCTTGAAGTTTCAAAACGGAAACTATTGGGAGAAGGTTTGGGATCCTGCACAATTGAAGAACTTCTACAGATAGAACATCAGCTGGAGAACAGTGTATGCACCGTACGAGCAAGAAAGACGCATGTCTTCAAAGAACAGATTGTGCAACTAAAGGAAAGGGAAAAGACCCTAGCAGTAGACAATGCGCGCCTATGTGCAAAGGGCCAGGATTTATACAAGTCTAAACAAGTGAGAGATAAGCAAATAGTGCGCAAACTCGGGAAGGCACCAATCATTGCAGCAGCAGCTTATTTGAGGATGGCAGGAAGGCCTCCTGTTCTCCCCTCCAGCAATCTGTCTTATTCAGAGAACTTCTTATACATGCTAGATTCATTAACATGAGATGAATTGCTCAACTGCAGCTGCCAGGCATCTTGCTTCAAGGTATGCATCCTTAATGTTGAATATAAACAAGATGCATCCCAAAAATCTTGCATTACATATCTGATTCTATATATTTTAGTGGTGTTGATGTATACACTGCTCTTGTTGGCGCTGTTGGTGCACTGTATG
>HS077518|Panax ginseng||KYERRC001_17-F01-T3.ab1 Panax ginseng in vitro-cultured adventitious root cDNA library Panax ginseng cDNA, mRNA sequence.
GCACGAGGGACCATGTTCTTGATACAACTGCAACGCTCGGGGCTGTTCCTGCTAGGTACAACTGGAATGGTGGTGAGATTGGATTTGACACTTACTTCTCCATGGCTAGAGGAAATGCCTCTGTTCCTGCTATGGAAATGACCAAGTGGTTTGACACCAACTACCATTACATAGTTCCTGAATTGGGACCTGAGGTGAAGTTTTCTTATGCATCACACAAAGCCGTGACTGAATACAAGGAGGCTAAGGCGCTTGGTGTAGATACCGTCCCCGTCCTCGTTGGCCCTGTCAGCTACTTGTTGCTATCTAAGCCTGCAAAGGGTGTTGAGAAAACATTCAATCTTCTCTCCCTTCTTGACAGCATCCTTCCAATTTACAAGGAAGTAGTGGCCGAGTTGAAGGCTGCTGGTGCTTCATGGATTCAGTTTGACGAACCCACACTTGTGAAGGATCTTGAAGCACACCAATTGGAAGCATTCACTGAGGCCTACTCTGAGCTAGAGTCATCTCTATCCGGCCTTAATGTTCTCATTGAGACATACTTTGCTGATGTTCCTGCTGAGGCATTCAAAACCCTCACTGCTCTAAAGGGTGTTACAGCCTTTGGTTTTGATTTGGTTCGTGGAGAAAAGACTCTTGATTTGATCAAGAGCGCATTCCCTTCAGGCAAATACCTCTTTGCTGGTGTTGTTGATGGAAGGAACATATGGGCCAATGACCTTGCGGCATCTCTCAGTGTCCTTGAGTCCCTTGAGGGAATTGTGGGAAAAGACAAACTTGTCGTTTCTACATCCTGCTCACTTCTCCACACTGCTGTCGATCTTGTTAATGAGCCCAAGCTGGACACTGAAATCAAATCATGGCTGGCATTTGCTGCTC
>HS077515|Panax ginseng||KYERRC001_17-E10-T3.ab1 Panax ginseng in vitro-cultured adventitious root cDNA library Panax ginseng cDNA, mRNA sequence.
GGCACGAGGTTCCCTTTCAGGGGTCGTCCTGTTACACGAGCTCTCTCTGGATCTCTCTTCTTTCTATCCTCTATTTCTTTCTCACACAGACACACTTGTAGTTGCCGAGCAATTTGATCGAAGATCTTTTTACCCGAGTATTCCATTCGTCCACTTTGATCTTTTCATCAAACGGATTGTTTCTAATCTGTTAAAATGCCTCTCAGACTTGAAATCAAGAGAAAACTTGCTCAGAGGTCAGAAAGGGTAAAATCTGTGGATCTACATCCAACTGAGCCATGGATTCTGGCAAGTTTATATTCGGGTACTGTTTGCATATGGAACTACCAGTCTCAGACTATGGCGAAATCGTTTGAGGTGACTGAGTTACCAGTTAGATCAGCTAAGTTTATACCACGCAAGCAGTGGGTTGTTGCTGGTGCAGATGACATGTTCATCCGTGTATACAATTACAATACAATGGATAAGGTTAAAGTTTTTGAGGCACACACAGATTATATTAGGTGTGTGGCTGTTCATCCTACCCTTCCATATGTCCTGTCATCAGCTGATGACATGCTTATAAAGCTTTGGGACTGGGAGAAGGGCTGGATGTGTACTCAAATTTTTGAGGGTCATTCCCATTATGTAATGCAAGTGACATTTAATCCAAAAGACACCAATACTTTTGCTAGTACATCCCTTGATCGTACCATAAAGATTTGGAATCTTGGCTCTCCTGATCCAAACTTCACGT
>HS077448|Panax ginseng||KYERRC001_16-G08-T3.ab1 Panax ginseng in vitro-cultured adventitious root cDNA library Panax ginseng cDNA, mRNA sequence.
GCACGAGGAGCAGTGAAATGGTCATCCTCGGCACTCAGTACGCCGGGGAAATGAAGAAAGGTCTTTTCAGTGTAATGCACTATCTCATGCCTAAGCGTCAAATCCTCTCCCTTCATTCTGGCTGCAATATGGGCAAAGATGGAGATGTTGCCCTCTTCTTTGGATTGTCAGGTACTGGAAAGACAACTCTGTCTACTGATCACAATCGGTACTTAATTGGAGATGATGAACATTGTTGGAGTGATAATGGCGTGTCAAATATTGAAGGTGGTTGCTATGCTAAGTGTATTGATCTTTCTAGGGAGAAGGAGCCTGATATCTGGAATGCTATCAAGTTTGGGACTGTTTTTATTACTTCTTCCTGGCAGTGTTGGAAAATGTGGTGTTTGATGAACATACAAGAGAGGTGGAATATGAAGAGAAATCAGTCACAGAGAACACTCGTGCTGCTTACCCTATCGAGTACATTCCAAATGCTAAGATCCCATGTGTTGGTCCACATCCAAAGAATGTCATACTTTTAGCATGTGATGCATTTGGTGTTCTCCCACCTGTGAGCAAGCTAAACATGGCACAGACCATGTACCACTTCATCAGCGGCTACACGGCTTTGGTGGCTGGCACTGAGGAAGGTGTGAAGGAGCCACAGGCAACATTCTCTGCCTGCTTTGGTGCAGCTTTTATTATGTTGCATCCTACCAAGTATGCTGCAATGCTCGCTACAAAAATGGAGAAGCATGGAGCAACAGGATGGCTCGTCAACACTGGATGGTCTGGTGGAAGCTATGGCTCGGGTAGCCGTATGAAGTTGGCATACACGAGAAAAATTATTGATGCAATACACTCTGGGCAGCCTTTTGAAATCA
>HS077425|Panax ginseng||KYERRC001_16-E09-T3.ab1 Panax ginseng in vitro-cultured adventitious root cDNA library Panax ginseng cDNA, mRNA sequence.
GCACGAGGCTCCCTTAAACCCTCTCTGCACAATTTTATCACACACCCTATTTGGGATTTTTGAAAGCGAATCGATTGGACAATGGGATTCGAGAAGATCAAAGTCGCCAACCCCATCGTTGAGATGGACGGAGATGAAATGACTCGAGTGTTCTGGAAATCAATAAAGGACAAGCTCATTTTTCCCTTTGTGGAGCTGGATATAAAATACTTTGACCTTGGCCTTCCTCACCGTGATGCAACAGATGATAAAGTTACTATTGAAAGTGCAGAGGCCACCCTCAAGTACAATGTGGCAATCAAGTGTGCTACCATTACTCCAGATGAAGCTCGTGTTGAGGAGTTTGGCCTGAAGCAGATGTGGAAGAGTCCAAATGGGACAATTAGGAACATTTTAAATGGGACCGTATTCAGGGAACCAATTATTTGCAAAAACATCCCCAAGCTTATTCCAGGCTGGACAAAGCCAATATGCATTGGAAGGCATGCTTTTGGTGATCAATACCGAGCAACTGATGCAGTTATCAAAGGACCTGGAAAACTTAAATTGGTTTTTGTACCAGAAGGAAAAGACGAAAAAACAGAGTTGGAAGTTTACAACTTCACTGGTGCTGGAGGTGTAGCTTTGTCAATGTACAACACAGATGAGTCCATTCATGCTTTTGCTGATGCTTCAATGAACACAGCTTACCAGAAAAAGTGGCCACTTTATCTTAGCACAAAAAATACTATTCTCAAGAAATATGATGGAAGATTTAAGGACATATTTCAAGAAGTTTATGAAGCAAGCTGGAAATCAAAGTTTGAAGCTGCTGGGATATGGTATGAACACCGTCTTATTGATGAT
>HS077424|Panax ginseng||KYERRC001_16-E08-T3.ab1 Panax ginseng in vitro-cultured adventitious root cDNA library Panax ginseng cDNA, mRNA sequence.
GCACGAGGGGCACTTAGGGTGAAGTCTTGGATTATGGGGAGTTTGTTAAGAATGCGCATGCAAAAGGGGTGAAGGTTGTTGTGGCAAGTGATCTCTTGGCTTTGACATTGTTAAAGCCTCCGGGTGAATTCGGGGCAGATATAGTTGTTGGTTCAGCTCAGAGGTTTGGGGTTCCGATGGGTTATGGTGGCCCTCATGCAGCCTTCCTTGCCACATCCCAAGACTACAAGAGAATGATGCCAGGACGAATTATTGGCGTCAGTGTCGATTCTTCTGGTAAGCCTGCTTTACGAATGGCGATGCAGACAAGGGAGCAACACATCCGGAGGGACAAGGCTACAAGCAACATTTGCACTGCTCAGGCATTGCTTGCCAACATGGCTGCTATGTATGCTGTTTACCATGGACCTGAAGGCCTTAAAACCATTGCCCAACGTGTCCATGGTCTTGCTGGCACATTTGCTGCTGGAGTGCAGAAACTTGGGACTGCGGAAGTCCAGGGGCTCCCCTTCTTTGACACTGTGAAGATTAAGTGTGCTGATTCGAAGAAAATTGTTGAAGCTGCTTATGAGAGTGAGATGAATTTTCGAGTTGTTGATAAGAATACTGTTACAGTTTCTTTTGATGAAACCACAACCTTAGAGGATGTTGATAAGCTATTCAAAGTTTTTGCTGGCGGGAAATCTGTTTCATTCACTGCTGCATCTCTTGCACCAGAGGTTCAGAATATTATCCCTTCTGGGCTTGAAAGGGAGAGCCCATTTCTGACCCACCCAATCTTCAACTCCTACCATACCGAGCACGAGCTTCTCAGATACATTCATAAGTTGCAGTCAAAGGATCTATCATTGTGCCACAGCATGATTCCCCTGGGATCTTGT
>HS077372|Panax ginseng||KYERRC001_15-H10-T3.ab1 Panax ginseng in vitro-cultured adventitious root cDNA library Panax ginseng cDNA, mRNA sequence.
GCACGAGGACCAATCTACTATTACGATTTGGAGAAGGTAGGGTTTATTGGTGATCGAATCTTCAGCTCCATCACAAGATGCCGTCTGTGTACGGAGCTCGGCTGACTACCTTCGAAGATTCAGAGAAGGAGAGCGAGTACGGTTACGTCCGAAAGGTATCAGGACCAGTTGTTGTTGCAGATGGAATGGGAGGGGCTGCTATGTATGAATTGGTTCGTGTTGGGCATGACAATCTTATTGGGGAAATTATTCGATTGGAAGGAGATTCTGCTACAATCCAAGTTTATGAAGAAACAGGTGGGTTGATGGTGAATGATCCCGTTCTACGAACGCACAAGCCCCTATCAGTGGAGTTGGGTCCTGGAATATTGGGGAATATATTTGATGGTATCCAGAGGCCTTTGAAGACCATTGCTAAAAGATCTGGTGATGTCTATATCCCTCGTGGTGTCTCTGTTCCAGCCCTCGACAAAGACATACTTTGGGAATTCCAGCCTAAGAAAATAGGTGAAGGGGATCTTCTTACAGGTGGAGATCTATATGCTATCGTCTATGAGAATAGTTTAATGCAACATCATGTTGCACTGCCTCCTGATGCTATGGGAAAGATAACATATGTTGCACCAGCTGGTCAATACTCACTGAAGGACACTGTTTTGGAGCTTGAGTTTCAAGGTGCCAAGAAGCAATTTACTATGCTTCAGACTTGGCCTGTACGAACACCTAGGCCTGTTGCATCAAAACTTGCTGCTGATACTCCTCTTCTTACAGGGCAGCGTGTTCTTGATGCCCTTTTCCCCTCGGTGCTTGGTGGAACCTGTGCCATTCCTGGTGCTTTTTGTTGTGGGAAAACAGTCATTAGTCAAGCTCTTTCAAGTACTCTAACTCCGATACTGTAGTCTACGTTGGTTGCGGGGAA
>HS080270|Panax ginseng||KYERRC001_46-G07-T3.ab1 Panax ginseng in vitro-cultured adventitious root cDNA library Panax ginseng cDNA, mRNA sequence.
GCACGAGGCTCCTTCCTCCGCCTCCGCCCTCTCGTTTCCACCGCCGCCATCATACGAGAGCGGGAGTTCCGATGGAAGTGATGGGATTGATGCTGGGTGAATTCGTGGATGATTATACAGTTCGTGTGGTGGATGTGTTTGCAATACCACAGAGTGGTACTGGTGTTAGTGTTGAAGCTGTCGATCATGTTTTTCAGACTAATATGCTGGATATGCTGAAGCAAACGGGGAGATAATCTGTCTTTTTGATTATGTCTTTTTTGATTATATATTATTGTCTGTTGTAGCTTTACTTTTGAACAATATATGTGTGTATAGACTAGGTTTTGAATTGTAAATAGTTTGATTTAGCTATTTTTCGTGGAGGAGCATATCATATATTTAGTTATTTGTTTAATTATGAAAATTTAAGGGACAAGAGTAAGTATGATATGTCTAGCCTCATAGTTATTTGCATCTTTGTTTTTTTTTCGAGTTCCTTGATCGAAATTTTGGTAGTTTGAGAGGTTAATGAAAACGAGGATGAAAGGTTAAGTTAGTTCTGGAATATGGGATTATAAGAATAGCTTAATTGAGCTTATTTAAGGAATCAAAGATAGGAAACTCTAGCTATTTTAATAGTTTAGAACTGAATATTATATGTAGGTGATGAGAAGTACCCAGTTTTACAGATTAGATCTTAAATTGTAGAATGGAAGTCTGTCTTAACATGTAACAAGAAAGAATCCACAATTCTATAGAATGGTGTCATGTACATAAAAAAAAGAGGCCAAGTAATTATAACTCTGTATGTGTATGAAAGTTTTAAATTGG
>HS080254|Panax ginseng||KYERRC001_46-F02-T3.ab1 Panax ginseng in vitro-cultured adventitious root cDNA library Panax ginseng cDNA, mRNA sequence.
CTGAGTCGTACGATCTCCCCTCGTCTGACATACTCCGGCGGCGCTTCTCCGTTGTTATCATCGCCGGGTTCAGCCCTATCCCCGTCGTCAACCACCGGTTGGGCTTCTTCTGACCTATCGCTACTGATAAACGACTTCACAACCTACGAATAGAGAGTAGAGATCGAGTCCACTACTAAAGGCTTAAATTCACAGTGACAACTCTTTTCTAAGTAACAATAAGGCTAAATGGAGGACTGGGAGGATGAGCCTGCCCCATTGGTTCTCAAAAAGGAGCTACCAAAGAATTTATGGGATGATGAAGATGTGGATGAGAATGATGTTAAGGACTCTTGGGAGGACGAAGATGAACCGGCTCCGGCACCCGTGGCAGAACCTCCTGCTGTAAAGCCCCCAAAGAAGTCGGTAGCAAAAGGTAGTGAAAAGAGAGGGAAAGCTGTTGAAGTAGTAAAGGAGGAACCACTGGATCCTGTAGCAGAAAAACTTCGACAGCAAAGGCTTGTTGAAGAAGCAGATTATAAAAACACGACAGAACTATTTGCTAAGAAAGGTGGTGATGATAATAAGTCTCTTGAGAACTTCATTCCCAAATCAGAAAGTGACTTCTTAGAATATGCAGAGCTCATTTCGCATAAACTTCGTCCATACGAGAGAAGTTTCCATTATATTGGGTTGCTGAAGGCTGTGATGAGACTGTCGATGACTTCTCTGAAAGCAGCAGATGCGAAAGAAGTTGCCTCTTCTGTCACTGCCATTGCAAATGAAAAGCTGAAA
>HS080240|Panax ginseng||KYERRC001_46-D12-T3.ab1 Panax ginseng in vitro-cultured adventitious root cDNA library Panax ginseng cDNA, mRNA sequence.
GCACGAGGCTTATTTGCTCTCTCTAAAACCCTCTCTGCACAATTTTATCACACACCCTATTTGGGATTTTTGAAAGCGAATCGATTGGACAATGGGATTCGAGAAGATCAAAGTCGCCAACCCCATCGTTGAGATGGACGGAGATGAAATGACTCGAGTGTTCTGGAAATCAATAAAGGACAAGCTCATTTTTCCCTTTGTGGAGCTGGATATAAAATACTTTGACCTTGGCCTTCCTCACCGTGATGCAACAGATGATAAAGTTACTATTGAAAGTGCAGAGGCCACCCTCAAGTACAATGTGGCAATCAAGTGTGCTACCATTACTCCAGATGAAGCTCGTGTTGAGGAGTTTGGCCTGAAGCAGATGTGGAAGAGTCCAAATGGGACAATTAGGAACATTTTAAATGGGACCGTATTCAGGGAACCAATTATTTGCAAAAACATCCCCAAGCTTATTCCAGGCTGGACAAAGCCAATATGCATTGGAAGGCATGCTTTTGGTGATCAATACCGAGCAACTGATGCAGTTATCAAAGGACCTGGAAAACTTAAATTGGTTTTTGTACCAGAAGGAAAAGACGAAAAAACAGAGTTGGAAGTTTACAACTTCACTGGTGCTGGAGGTGTAGCTTTGTCAATGTACAACACAGATGAGTCCATTCATGCTTTTGCTGATGCTTCAATGAACACAGCTTACCAGAAAAAGTGGCCACTTTATCTTAGCACAAAAAATACTATTCTCAAGAAATATGATGGAAGATTTAAGGACATATTTCAAGAAGTTTATGAAGCAAGCTGGAAATCAAAGTTTGAAGCTGCTGGGATATGGTATGAACACCGTCTTATTGATGATATGGTTGCATATGCTCTTAAGAGTGACGGAGGTTATGTAT
>HS080234|Panax ginseng||KYERRC001_46-D06-T3.ab1 Panax ginseng in vitro-cultured adventitious root cDNA library Panax ginseng cDNA, mRNA sequence.
GCACGAGGGCACACTCTAGCTTACCCGCCCCTTCTTCTCCTCCCTCTGCACACTCTCTCCCTCTATTCAGTCAATCATGGGTAGAGTACGAACCAAGACCGTGAAGAAATCGTCCCGCCAAGTGATCGAGCGGTACTACTCGAAAATGACACTCGATTTCCACACCAACAAGAAGATCCTGGAAGAGGTGGCGATTATCCCCTCCAAGCGCCTCCGCAACAAGATTGCTGGATTCTCCACTCACTTGATGAAGCGCATACAAAAGGGTCCAGTTCGCGGCATCTCCCTCAAGCTTCAGGAAGAGGAAAGAGAAAGGCGCATGGATTTCGTCCCAGATGAGTCTGCCATCAAGACTGACCGCATCGAGGTTGACAAGGAGACCATTGACCTTTTGGCTTCTCTGGGTATGAGTGAACTTCCTGGGATTGTGCTCAAGGAGGAGCAAGCTGCTGCCATTTCCTCTTTACCGCCTTACGGTGGTGGCCGTGGTGGTTTTGCTGGTGGTGCAAGTGGCAGGAGGTACTGATTTGGGGGTTCAGTGGTAATGGATTTTGCGTAGTTTTTGTTATGCAACCTTTTCTTGAATGAGTCACTTTTAAGTTTCTCGATAAATGAATATTGTTATTGTTGGTTTAATTCGGATTATGTTGGAAGAGATTTAAATTTTATTTTAATTCGTACTTCTATTTTAAACTTGAAATGGAAATTTTATTAAGTAGTATGTTGACGATGACTGGAAATTTTGAACAAAAATGCTGTTCTGTTTGTTGTGGGTAGTGTACCAGTTTTGGTTGGGTGGTAATTTATTTTCTGGTGGGACTATCTTAATCT
>HS080223|Panax ginseng||KYERRC001_46-C07-T3.ab1 Panax ginseng in vitro-cultured adventitious root cDNA library Panax ginseng cDNA, mRNA sequence.
GCACGAGGAACCTTTTTACAGTTTCTCGTTTGATAAGCTTTTCGGTTGAACTACGGTTAAGGAAAAGTTTCACATTAACATTGTGGTTATAGGCCATGTCGACTCTGGAAAGTCTACCACCACAGGTCACTTGATCTACAAGCTTGGTGGTATTGACAAGCGTGTTATTGAAAGGTTTGAGAAGGAGGCTGCTGAAATGAACAAGAGGTCGTTCAAGTATGCCTGGGTGCTTGACAAGCTCAAGGCTGAGCGTGAACGTGGTATTACCATTGATATTGCCTTGTGGAAGTTTGAAACCACCAGGTACTACTGCACGGTCATTGATGCCCCTGGACATCGTGACTTTATCAAGAACATGATTACTGGTACCTCACAGGCTGACTGTGCCGTCCTCATCATTGACTCCACCACTGGTGGTTTTGAAGCTGGTATCTCTAAAGATGGTCAGACCCGTGAGCATGCTTTGCTTGCTTTCACCCTTGGTGTCAAACAAATGATTTGCTGTTGTAACAAGATGGATGCTACCACCCCAAAATACTCTAAAGCAAGGTACGAAGAAATTGTGAAGGAAGTTTCTTCATACTTGAAGAAGGTTGGATACAACCCAGATAAAATTGCTTTTGTCCCCATCTCCGGATTCGAGGGAGACAACATGATTGAGAGGTCCACAAACCTTGACTGGTACAAGGGCCCAACACTCCTCGAGGCCCTTGACTTGATTAATGAACCCAAGAGGCCCTCTGACAAGCCCCTCCGTCTCCCACTTCAGGATGTGTACAAGATTGGTGGTATTGGAACTGTGCCAG
>HS080220|Panax ginseng||KYERRC001_46-C04-T3.ab1 Panax ginseng in vitro-cultured adventitious root cDNA library Panax ginseng cDNA, mRNA sequence.
GCACGAGGTACCTATAGTTTCTCGTTTGATAAGCTTTTCGGTTGAACTATGGGTCATGAAAAGTTTCACATTAACATTGTGGTTATAGGCCATGTCGACTCTGGAAAGTCTACCACCACAGGTCACTTGATCTACAAGCTTGGTGGTATTGACAAGCGTGTTATTGAAAGGTTTGAGAAGGAGGCTGCTGAAATGAACAAGAGGTCGTTCAAGTATGCCTGGGTGCTTGACAAGCTCAAGGCTGAGCGTGAACGTGGTATTACCATTGATATTGCCTTGTGGAAGTTTGAAACCACCAGGTACTACTGCACGGTCATTGATGCCCCTGGACATCGTGACTTTATCAAGAACATGATTACTGGTACCTCACAGGCTGACTGTGCCGTCCTCATCATTGACTCCACCACTGGTGGTTTTGAAGCTGGTATCTCTAAAGATGGTCAGACCCGTGAGCATGCTTTGCTTGCTTTCACCCTTGGTGTCAAACAAATGATTTGCTGTTGTAACAAGATGGATGCTACCACCCCAAAATACTCTAAAGCAAGGTACGAAGAAATTGTGAAGGAAGTTTCTTCATACTTGAAGAAGGTTGGATACAACCCAGATAAAATTGCTTTTGTCCCCATCTCCGGATTCGAGGGAGACAACATGATTGAGAGGTCCACAAACCTTGACTGGTACAAGGGCCCAACACTCCTCGAGGCCCTTGACTTGATTAATGAACCCAAGAGGCCCTCTGACAAGCCCCTCCGTCTCCCACTTC
>HS080198|Panax ginseng||KYERRC001_46-A06-T3.ab1 Panax ginseng in vitro-cultured adventitious root cDNA library Panax ginseng cDNA, mRNA sequence.
TTCAAGCTCACGCCTTCCCTTTAAGCGTTCGACTGTTCGTTATCCCAGATCTAATATCAAAAGCGAACGCTTTTATCCGTTAAATCATGGCGCTGGTCCTGCATACGACAAAAACAAACAAAAATGCTTACAAGATACTTATCACTGCGGAGTATACTGGAGTCCAAGTGGAACTGGTCCAGAATTTTGAGATGGGTGTATCAAATAAAACCCCAGAGTTTCTCAAGATGAACCCTATTGGCAAGGTTCCGGTGTTGGAAACTCCTGATGGTCCTATCTTTGAGAGCAATGCCATTGCACGTTATGTTGCCCGTTTGAAGCCTGACAACTCTCTGTGTGGTTCTTCGCAAATAGAATGTGGTCTAATTGAGCAGTGGATTGACTTTGCTACTTTGGAAATTGATGCAAACTTAAGGTTCTGGTTTTTGCCAAGAATTGGACGCGCTGTATACCTTCCTCCAGCAGAGGAGGCTGCTATAACTGCATTAAAGAGAGCTCTTGGCGCTTTGAACACGTATCTTGATTCAAACACTTTCTTGGCTGGTCATGCTGTGACATTGGCTGACATTATCGTAACATGTAACTTGCACTTTGGATTTACTATGCTCATGACTAAGAGCTTCACAGCTGAGTTTCCTCATGTTGAGAGGTACTTCTGGACCATGGTTAATCAACCCAATTTCAGCAAGATTATCGGTGTGGTGAAGCAGACAGAAAGTGTTCCGCCAGTTCAGGCTGCCAAAAAGCCATCACAACCAAAAGAAGCTGCTAAATCAAAGCCCAAGGAGGAAGCAAAGAAAGAAACTAAGAAGGAAGCACCGAAGCCCAAAGTTGAAGCTGGAGAGGAAGAGGAAGAAGCACCCAAACCTAGCCAAAGAATCCTCTTGATTTGCTGCCCCCAAGCAAGATGATATTGGATGAGTGGA
>HS080186|Panax ginseng||KYERRC001_45-H06-T3.ab1 Panax ginseng in vitro-cultured adventitious root cDNA library Panax ginseng cDNA, mRNA sequence.
GCACGAGGTAACATCTCCGCACTTCCCTATTTCTCGTCACCCTATTGAGTACAATTTATCGTTTACCGATCAGGCTATCGCCATTAATTAAATTGAGAGGGAGAGAGGGAGAGGATATGTCTAGATTGTGGGCGAAAATAAGGGGTGTATTCAGCAACAGAACAGTTGAGGGAGTAGATAAAGCAGGAAATCGATACTTCGCCAGAACAGAAGAGATCGATGGCATCATGAAGGAGAAAAGATGGGTGGTTTTTAAGGGGGAGGATGATCCGACATCTGTACCTGTTGAGTGGATATGTTGGCTTAATGGGCAGCGGAAAAGAGCTCCAACACCAGAGGAAATGGCCGAGATGGAGGCGAGACGTGAACGCGTAAGACTTAATGTTGCTCTTCTCAAGAAGGAAGAAGAGGAAAGGAGAGCCAAAGCAGGCAGTAGTCATAAAAGCAGAAGTATTGGTAAAGTTGGAGGTCCAGACTTGAAAAGTTTTATCCAGCAATTTCCAGTTGCTTCAGAAGATGTTAACAGTGAAGATGCATCAGATGCAACAGGTGGCATGAGGAGCTCCCAAGAAATGGAGACACAGGAAAAATCTCCAGATCAAGCTGAGCAAGAACCGGAGTCGTCAGAGCCAACAGGGTCTGGGGCATCATTTAAACCAGGGACATGGCAACCACCGCCATGATGACTATATAATATATCATCTACTCACGCAGCATCTCCAACTCACCATAATGCTATTGATTCACAAGTTCAATCCACTGACTATATCCAGCCAGCCAGCCAGCCAGCCAGCCAGCCAGCCAGCCAGCGCTGATTGATACATGAAGTGCTCCACAACGTCA
>HS080155|Panax ginseng||KYERRC001_45-E11-T3.ab1 Panax ginseng in vitro-cultured adventitious root cDNA library Panax ginseng cDNA, mRNA sequence.
GCACGAGGTAGACAGTGAGAGAGAGAGAGATCGAAACACAAAGCGGGCCTAGAAATATAAAGAGGGTCGACGAGAGATTTAGTTATTTCTCTCGTGAAAATTGAGGGCAAATAAACCCTAATTCTCTCCTGGGCTCCCCAGATTCAGGGTTTTATACTTTAAGAGGAGCTTGAGATCGTGTTTTTGAAGAATAATGGTTTCTCCATTATAATTCTCTCCTACTCTATAATTATTTATATGTAATATCTGGATATATTTTAGGGTTTAACTTCTGAGTCGTAGTAGTGATTGTGATATGGACGGAAGGAGGATTACGGCGAATCCGCGGCCGTGCTGTGGCCGGCGGGTTGTGGCAAAGAAGCGGCCACGCAACGGCTCTGATGGGTTTGTGAACAGTGTTAAGAAGCTCCAGAGGAGAGAGATTTGTTCCAAGCGTGACAGGGCTTTCAGTATGAGCGATGCTCAAGAAAGGTTCAGGAACATTCGTTTGCAGGAGGAATATGATACTCATGATCCAAAGGGACATTGTGCCATGGTACTGCCATTTCTAAAAAAGAGGTCAAAAATTATTGAGATAGTTGCTGCTCGTGACATTGTCTTTGCTCTTGCGCAGTCTGGTGTTTGTGCTGCATTTAGCCGAGAGACCAATCAAAGGATATGCTTTCTGAATGTCAGTCCTGATGAAGTTATACGAAGCTTGTTTTACAATAAAAACAATGATTCCCTTATCACTGTTTCGGTTTATGCGTCAGATAATTTCAGTTCCTTGAAATGCAGAACCACGAGGATTGAATACATACGACGTGGTAAACCAGATGCTG
>HS080064|Panax ginseng||KYERRC001_44-F03-T3.ab1 Panax ginseng in vitro-cultured adventitious root cDNA library Panax ginseng cDNA, mRNA sequence.
GCACGAGGATTCTGTGGCGTCTTAATAAACGCTCTCAATATTATCTCTCTCTCTTGCTCTACATTTTCCTTCAATCTCTAGTTAACTCTTGATTCCTCCTTTCAATTGAAAATGAGAGAGTGCATTTCGATTCACATTGGTCAGGCCGGTATTCAGGTCGGCAACGCCTGCTGGGAACTCTACTGCCTTGAGCATGGCATTCAGCCTGATGGCCAGATGCCGAGTGACAAAACTGTTGGGGGAGGTGATGATGCCTTTAACACATTTTTTAGTGAAACTGGTGCCGGAAAGCATGTTCCTCGTGCAATTTTTGTAGATCTTGAGCCCACTGTGATTGATGAAGTGAGGACTGGAGCATATCGTCAACTCTTTCATCCAGAACAGCTCATCAGCGGCAAAGAAGATGCAGCTAACAACTTTGCCCGTGGCCACTATACCATTGGAAAGGAAATTGTTGACCTTTGCTTGGATCGTATTCGGAAGCTTGCCGACAATTGCACTGGTCTCCAAGGTTTCCTTGTTTTTAATGCTGTTGGTGGAGGCACTGGTTCTGGTCTTGGCTCCCTTCTTTTGGAGCGCCTGTCTGTGGACTATGGCAAAAAATCCAAACTTGGATTCACTGTTTATCCCTCACCCCAAGTCTCAACCTCTGTTGTGGAGCCCTACAACAGTGTGCTCTCAACCCATTCCCTTTTGGAACACACTGATGTTTCCGTGCTGCTTGACAATGAAGCCATCTATGATATTTGCAGGCGGTCCCTTGACATCGAGCGCCCCACCTATACCAACCTTAATCGTTTGGTTTCTCAGGTTATTTCCTCCTTGACTACTTCTTTAAGGTTTGATGGAGCTCTGAATGTTGACGTGACTGAGTTCCAGACTAATCTGG
>HS080062|Panax ginseng||KYERRC001_44-F01-T3.ab1 Panax ginseng in vitro-cultured adventitious root cDNA library Panax ginseng cDNA, mRNA sequence.
GCACGAGGCCGTTTTATTCCCTCCAAACTTACAGTTACAGATCGTGGATGAGAAGGAGTTGAAGGCGTAATCGATCAAAATAAGAAGAATCCGAAGGTGTTGATCGAAGAAAAGAAAAATGGTGCTGGTATCGGCCGTAAAAGAATATGTAAATCGAATGTTACAAGATATTTCAGGCATGAAGGTCCTCATTCTCGATTCCCAAACGGTTAGTATTGTGAGTGTTGTGTATTCTCAGTCAGAACTTCTTCAGAAAGAAGTATTTTTGGTAGAACTTGTTGATTCCATATCCAAGTCAAAAGAACCAATCTCGCATCTCAAGGCGGTATACTTCCTGCGACCTACATCAGGGAATATTCAGCATATGAAGCGACAGTTGGCCAATCCTCGATTTGGAGAGTATCATCTTTTTTTCTCCAACATATTGAATAATACTCAGCTGCATATTCTAGCTGATTCGGATGAACACGAAGTTGTCCAACAAGTTCAGGAGTTCTATGCAGATTTTGTTGCAGTTGACCCTTACCATTTCAATCTGAATATTGCATCAAATCACATGTATATGCTCCCAGCAGTCGTAGATCCTTCAAATTTGCAGTATTTCTGTGATCGAGTCGTCGATGGACTAGCTGCTATCTTCTTGGCATTAAAACGACGACCTGTTATTCGGTATTCACGTACATCTGATATTGCTAAAAGGATTGCACAGGAAGCAGGGAAGCTGATGTACGAGCAGGAAAGTGGCCTATTTGATTTCAGACGCACAGAAATTTCTCCTATGTTGCTAGTGATTGATAGGCGAGACGACCCCGTAACTCCACTGCTGAATCAGTGGACATATCAGGCAATGGTTCACGAGTTGATAGGCATTCA
>HS080055|Panax ginseng||KYERRC001_44-E06-T3.ab1 Panax ginseng in vitro-cultured adventitious root cDNA library Panax ginseng cDNA, mRNA sequence.
GCACGAGGTGCCAATGGTGTTGCAGGTGAAAATTATGATAAATCAAAGCAAGTTCTTCTTGTGAAAGCATTTTTAACTGCCCGTGACTTGATTCTTGAAGAGCTACGAAAACTCAGCAGAGCAATAAATGAAAATATTGATTTGACTGATTTTACTTCAAAACTTGAGGACAAAATGTTGTTTGGCTTGTCTCCAAAAGTGGGTTGGGGGATCGCAGATGCTGAAGTCTCTGGACAGAAGTCAAGCATGTTACAAAATTTTCCAGAGAAATGTAATGGTAATGTGGATTTGCAAAGCGACTTCTTTCACTCGTTATCTAAGGATGAACTAGTCTGTGCTTTCCATTCACTAGGGGATCAGTTGTTGTATCTATGGAACATGTTTCTGCAGTTCCACAGGGCTAACAAATCAAGGATTATGGAATTTCTGCGTGATGTGTGGGCTCGTGATAGAAAAGCTGAATGGTCAATATGGATGGTGTACTCTAAGGTTGAGATGCCTCACCAGTATATAAGTAGTGAGGTTGATGGCTCTTCCCAACCAGCTGTTCGTCGAAAAGCACTTGTTCTGCGAAAGTTAACCGAAGATCCAGCCCAGACTGCAGCTACACGTGCGGAGCTTCATCGTCGTAGTATTGCACAGATGAGGATCAACAGTCGGTCAATTCAAGACATGCATATATTTGGAGATCCATCACGCATTCCCATTATAATTGTAGAACGTGTTGTGAATGCTCCNAGGCGTTCCACAAGTGGAAACTCATTCTTCATCCACCAGGAACAGAAAGATACACATGGCATTTGTTCTGAAATTGATTCTAAGAACATAAACAAGTTCTCTGGTACTCCCCT
>HS080016|Panax ginseng||KYERRC001_44-B02-T3.ab1 Panax ginseng in vitro-cultured adventitious root cDNA library Panax ginseng cDNA, mRNA sequence.
GCACGAGGCAACTGTAACCATAGCTCCCGATTTTGCTTCTCAATTTCCATCCCAAAACCCATCTCTTTTCAAATGCAACCATTAATTCCCGATTTTGCTTCTCAATCAACTGTGCGTCTTGTAGATCTTAGTTTAGGGCTAAAGGAAAACTCGGGCGACTGGCCGAAGATGAAAACAATCACGCACCTCCTTACAATCACGCACCTCCTAAATGTCTCATATCCACCCTTAATATCTTATACAAGAGCCTAAATCTATCATACCGAGTCAAGCCCTAATCGCACATAGGAACTTTCACTTTGCTTTATTCTTCTTGTGTCATTGAATTTGTCTCGCATGTATGATTTGTCTGGCAGGTGCAAGAACTAGAAACAGAAGATGGGCTATACTTGGGATAATTTTGATGACGGAGGGTTGGAGGAAGATATCATTTTACTTCAATCGACAAAACCATTGAGTTTGATGAGAACCGTAATGTTGATATCATTTTACTTCAATCGACAAAACCATTGAGTTTGATGAGAACCGTAATGTTCAGCGTGCTAAATTCGTGGTTCGAGCACACATGCAGGGTGGTAGATTTTTAGATGGATGGGGCTCATGTGAAAGGCGTGAGAAGAGATTTATGAAACCAAATCATGATATTCCCAGCACAGCAGAAACCAGAGCAAAAAACAAAACATGCTAGTCATTGGATGGCTGCAGTCGTTGCCATATGATCAATTGGACTTTCCAAGGGAGAGAGGTTCAGTGGTTAAATGAACCTTTAGCTACCGTCGTATAAGATAACAACAGATGAAACTATAGAAGATTGTCGTACCCGGTACAATGGCGATGCAGACCATCATCAACGGCGTAAAAAGTTCACATTTCCTA
>HS080008|Panax ginseng||KYERRC001_44-A06-T3.ab1 Panax ginseng in vitro-cultured adventitious root cDNA library Panax ginseng cDNA, mRNA sequence.
GCACGAGGGACCATTCGATGCCTAAATGGAGGTGCAGGGTCATGTGGGTTACCCGTTTAGCCACCCGTGGGATTCTGTTCTCTTTTGGCTATCATTGGATAAAACGAAGAGGGAAACCTGCTCCAAGGGAGATGGCTCCTATAATTGTATCTAATCATGTATCATATATCGATCCTATATTCTTTTTCTATGAATTTTTTCCTACCATTGTTGCAAGTGATTCCCATGATTCCATGCCCTTTGTTGGAACCATCATCAGGGCTATGCAGGTGATCTACGTCAATAGATTTGCACCATCATCAAGGAAACATGCTATTAGTGAAATAAAGAGAAAGGCTTCATGCAATAGATTTCCTCGAGTGCTTTTATTTCCTGAAGGAACCACAACCAATGGAAGAGCTCTCATCTCATTTCAACTTGGTGCATTTATTCCTGGTTATCCTATCCAGCCTGTAGTTGTTCGCTATCCCCATCTACACTTTGATCAATCCTGGGGGAATATTTCATTGGCTAAGCTTATGTTCAGAATGTTCACACAGTTTCACAATTTCATGGAGGTTGAATATCTTCCTATTGTTTCACCCCTGGAAAAACAAAAGGAAAATGCTGTGCAGTTTGCTGAGAGGACTTCTCATGTTATGTCTACTGCTCTCAATGTTGTACAAACATCTCATTCCTTTGGGGATGTATTGCTTCTTTTTAAAGCAATCAAGTCTAAGCAGGAAAATCCATCACTTTATATGGTTGAAATGGCGAAGGTGGAAATGTCATCTCGTATAAGCTCTTTGGAAGCAGTGCACTTATTGGAGATATTTCTTTCCATGAACCCAGACCCCAGTGGACATGTTGGAATAGATGACTTCTTGAGGGGTTCAAGATTGAAGCCTTGTTCTCTTTCTC
>HS079991|Panax ginseng||KYERRC001_43-G12-T3.ab1 Panax ginseng in vitro-cultured adventitious root cDNA library Panax ginseng cDNA, mRNA sequence.
GCACGAGGCCCCGTTTGACTTGTTCCTCGCCTCAGGATCATCAACTGAAACTACTTATGCTTACTCATATGCTGGCCGGTCCGGTTAAATCCAATGGAATCCGCCTTAGTCTATACCTATACGGGTAGTGCTATTCGGTTCAAGGTAAGCAGCTGAAGCAACTGCTGGGGGTACCTATCCAACTCTCTCCGCCGCTGGCATTCCTTGTTTGAGGCATATCGATTATAGAAGACATTTGGGTTCGGACGCGAGCGAAGGGAAGCTAGGTACTATGGTTCAATGGGTGAGGATGCTAGGTTACCTGGTTCTCAAATCGGGTATTGAACCCTCTCTCCCTGCAACTCAATCTGCTTCTATATCCTCCTTTTGGGGTCTCGATCTCGAACTCAAACTGATGCCTAGCTGCCTGAATCTCTGCTTTCTTCTACTACCAGCGGGCTAGCTGCCTTAGTTATGTTATATCGATCCCTTTGGTTGGAGGACGGATCTCGCTACATACTAGAAAGATGTTAATCGCCGCATTGGAACTACCTACCATGAACCTTCTACCCCGAAATCCCACCACTTAGCTGTCCGCATTTCCGATTGGGAACGGGGACTAGCGGACGTACCATGATACTTTCTGTTTTGTCGAGCCTTGCTTTGGGTTGATTTTCTTTTCTTTTGAAAGCGGCATTCTCCCTGGAATCTATAATCCAATCGTTGATCATGAATCTCCTTCGCCCGTTATCTCCTCATCTTCCTCTTTATAAGCCACAGCTCACTTCTACGTTTTCAATTTTCCATAGAATCTCCGGAGCTTTCCTAGCCACTATAGTTTTGTTTTTTTATCTCCTTTGTCTGAAAATGGGTTTGATTTGC
>HS079966|Panax ginseng||KYERRC001_43-E11-T3.ab1 Panax ginseng in vitro-cultured adventitious root cDNA library Panax ginseng cDNA, mRNA sequence.
GCACGAGGGTCCTTTGGTACAGAAGTTGAAGTTTTGCGCGCTTTAATCTAACAACGTCAGCTCTAAGAATCTCAGCACTCCTTACTCATCATCGTCACTCATTCACTTCCTCAATCTCTTTGCTTTCTCCATGGACGAAATCTCACCTGAGAAGAGGCATCTTTCAGTACAGCTCTGCTGCTGCCACTGAGGAGGCAGTCAAGTCACCTGTTGATGTAAATTATTCTCAACTACTAATCAACGGACAATTTGTTGATGCGGTATCAGGGAAAACTTTTCCAACTTTGGATCCCAGGACAGGAGATGTGATTGCCCAAGTTTCTGAAGGTGACGCAGAAGATATTAACCGAGCTGTAGCTGCTGCTCGAAAGGCTTTTGATGAAGGACCATGGCCAAAATTGACTGCTTATGAAAGATCGAGGATAATGTTTAGGTTTGCAGATTTACTGGAAAAGCATAATGATGAGATTGCCGCGCTTGAGACTTGGGATAATGGCAAACCATATGAACAGTCGGCTAATATTGAAATACCGATGGTAGCACGTTTATTTCGATATTATGCAGGTTGGGCTGATAAAATTCACGGTCTTACTGTTCCTGCGGATGGGCCATATCATGTGCAAACTTTGCACGAACCAATTGGTGTTGCTGGACAGATTATTCCATGGAACTTTCCTCTTCTCATGTATGCCTGGAAGGTTGGGCCTGCATTAGCATGTGGTAACACAGTTGTTCTGAAGACGGCAGAACAGACACCATTGTCTGCTCTCTATGTG
>HS079922|Panax ginseng||KYERRC001_43-B02-T3.ab1 Panax ginseng in vitro-cultured adventitious root cDNA library Panax ginseng cDNA, mRNA sequence.
GCACGAGGGGTCCTGTAAGGTGAAGTCTTGGATTATGGGGAGTTTGTTAAGAATGCGTATGCAAAAGGGGTGAAGGTTGTTGTGGCAAGTGATCTCTTGGCTTTGACATTGTTAAAGCCTCCGGGTGAATTCGGGGCAGATATAGTTGTTGGTTCAGCTCAGAGGTTTGGGGTTCCGATGGGTTATGGTGGCCCTCATGCAGCCTTCCTTGCCACATCCCAAGACTACAAGAGAATGATGCCAGGACGAATTATTGGCGTCAGTGTCGATTCTTCTGGTAAGCCTGCTTTACGAATGGCGATGCAGACAAGGGAGCAACACATCCGGAGGGACAAGGCTACAAGCAACATTTGCACTGCTCAGGCATTGCTTGCCAACATGGCTGCTATGTATGCTGTTTACCATGGACCTGAAGGCCTTAAAACCATTGCCCAACGTGTCCATGGTCTTGCTGGCACATTTGCTGCTGGAGTGCAGAAACTTGGGACTGCGGAAGTCCAGGGGCTCCCCTTCTTTGACACTGTGAAGATTAAGTGTGCTGATTCGAAGAAAATTGTTGAAGCTGCTTATGAGAGTGAGATGAATTTTCGAGTTGTTGATAAGAATACTGTTACAGTTTCTTTTGATGAAACCACAACCTTAGAGGATGTTGATAAGCTATTCAAAGTTTTTGCTGGCGGGAAATCTGTTTCATTCACTGCTGCATCTCTTGCACCAGAGGTTCAGAATATTATCCCTTCTGGGCTTGAAAGGGAGAGCCCATTTCTGACCCACCCAATCTTCAACTCCTACCATACCGAGCACGAGCTTCTCAGATACATTCATAAGTTGCAGTCAAAGGATCTATCATTGTGCCACAGCATGATTCCCCTGG
>HS079884|Panax ginseng||KYERRC001_42-F10-T3.ab1 Panax ginseng in vitro-cultured adventitious root cDNA library Panax ginseng cDNA, mRNA sequence.
GCACGAGGGTCAATTTACTATTCTCCGCTTCTTCCTCTTCCTAAAGAACAATGGCATCCCATATTGTTGGTTACCCACGCATGGGCCCAAAAAGAGAGCTCAAATTTGCTCTTGAATCTTTCTGGGATGGGAAGAGCAGTGCTGAGGACTTGCAAAAGGTGGCTTCTGATCTCAGGTCATCCATCTGGAAGCAGATGAATGATGCTGGCATCAAGTACATTCCCAGCAACACATTCTCATACTATGACCAAGTTCTTGATACAACTGCAACGCTCGGGGCTGTTCCTGCTAGGTACAACTGGAATGGTGGTGAGATTGGATTTGACACTTACTTCTCCATGGCTAGAGGAAATGCCTCTGTTCCTGCTATGGAAATGACCAAGTGGTTTGACACCAACTACCATTACATAGTTCCTGAATTGGGACCTGAGGTGAAGTTTTCTTATGCATCACACAAAGCCGTGACTGAATACAAGGAGGCTAAGGCGCTTGGTGTAGATACCGTCCCCGTCCTCGTTGGCCCTGTCAGCTACTTGTTGCTATCTAAGCCTGCAAAGGGTGTTGAGAAAACATTCAATCTTCTCTCCCTTCTTGACAGCATCCTTCCAATTTACAAGGAAGTAGTGGCCGAGTTGAAGGCTGCTGGTGCTTCATGGATTCAGTTTGACGAACCCACACTTGTGAAGGATCTTGAAGCACACCAATTGGAAGCATTCACTGAGGCCTACTCTGAGCTAGAGTCATCTCTATCCG
>HS077338|Panax ginseng||KYERRC001_15-E10-T3.ab1 Panax ginseng in vitro-cultured adventitious root cDNA library Panax ginseng cDNA, mRNA sequence.
GCACGAGGCTCCTCTCGATAGAGTAGAGAGAGAAAGTGGAGAGAGAAATTTGAGTGAGAAATACCTCTATGCGAGAAACAGACATATATAGATAGATACAGACAGAGAGAGTGCAACTAGCTAGAAGAGAGAGAGAGAGAGCAGTTGTTTCTACCTCGAGCTCGTCGTTTCTCCAACCCTGAGTCTTCTATTATATCTTCAATCGATCTCTTCGTTTTGTAATCCATCTCTATCGGTGCAAGTCTCCTTTGAGCTTCTTTCTATCTGCTAATATGCTGGCTTGATTGATTGATTATCTTTCTCTGGATTTGAAGACGGCTTAGATACAATGTCTTCTCTCAGTAGAGAGCTTGTGTTCTTGATCTTACAGTTCCTAGATGAGGAAAAATTCAAGGAGACTGTTCACAAGCTTGAACAAGAATCTGGATTTTACTTTAACATGAAATACTTTGAGGAAGAAGTACATAATGGGAACTGGGATGAGGTTGAGAAATACCTCTCTGGTTTCACAAAAGTGGACGACAATCGGTACTCGATGAAGATCTTTTTTGAGATAAGGAAGCAGAAATATCTAGAGGCATTGGATAAGAATGATCGATCCAAGGCTGTGGAAATCCTTGTAAAGGATCTTAAAGTTTTTGCATCATTTAATGAAGAGCTTTTCAAGGAGATTACTCAGCTTTTAACATTGGAGAACTTCAGGGAGAATGAGCAGCTGTCCAAATACGGAGATACAAAATCCGCAAGAAGCATTATGTTGGTTGAGCTCAAGAAGCTTATTGA
>HS077333|Panax ginseng||KYERRC001_15-E04-T3.ab1 Panax ginseng in vitro-cultured adventitious root cDNA library Panax ginseng cDNA, mRNA sequence.
GCACGAGGTCCCTTTCTAGGTCGGCGAGCGAGAGAAACTATCTACAGTTTCTCGTTTGATAAGCTTTTCGGTTGAACTATGGGTAAGGAAAAGTTTCACATTAACATTGTGGTTATAGGCCATGTCGACTCTGGAAAGTCTACCACCACAGGTCACTTGATCTACAAGCTTGGTGGTATTGACAAGCGTGTTATTGAAAGGTTTGAGAAGGAGGCTGCTGAAATGAACAAGAGGTCGTTCAAGTATGCCTGGGTGCTTGACAAGCTCAAGGCTGAGCGTGAACGTGGTATTACCATTGATATTGCCTTGTGGAAGTTTGAAACCACCAGGTACTACTGCACGGTCATTGATGCCCCTGGACATCGTGACTTTATCAAGAACATGATTACTGGTACCTCACAGGCTGACTGTGCCGTCCTCATCATTGACTCCACCACTGGTGGTTTTGAAGCTGGTATCTCTAAAGATGGTCAGACCCGTGAGCATGCTTTGCTTGCTTTCACCCTTGGTGTCAAACAAATGATTTGCTGTTGTAACAAGATGGATGCTACCACCCCAAAATACTCTAAAGCAAGGTACGAAGAAATTGTGAAGGAAGTTTCTTCATACTTGAAGAAGGTTGGATACAACCCAGATAAAATTGCTTTTGTCCCCATCTCCGGATTCGAGGGAGANCACATGATTGAGAGGTCCACAAACCTTGACTGGTACAAGGGCCCAACACTCCTCGAGGCCCTTGACTTGATTAATGAACCCAAGAGGCCCTCTGACAAGCCCCTCCGTCTCCCACT
>HS077322|Panax ginseng||KYERRC001_15-D05-T3.ab1 Panax ginseng in vitro-cultured adventitious root cDNA library Panax ginseng cDNA, mRNA sequence.
GCACGAGGCTACTTTTATTCATGGCAATGATGAGAAGAATTAACGGAATAGCCGTCGTTGGCCGAGCCATGAGCGGCGTCGCCGCCTCATCGGCATCCAGAAACGCAGCTCAACAACGGCTGTACCAAGCCGCTTTGTACAGCACTAGTTGCAACTCCTCTACGATGTGGTCTCGATGGTTCTCGCGTGACAGGCTAGCCCATTCGAATCGCTGCTCCACCGCCCAAGGCGTCGCCGGGGTCATGTTCTTCTCTGTCGCTGCTTCCTCACTCGCTGAAGAAGTCCATGCCAAAGAACCGCTGCAGTACAACAAGTTCGCCCCCAAAGATGTCGTTCTTTATCAGTATGAAGCTTGCCCTTTCTGTAACAAGGTTAAAGCATTCCTGGATTACTATGACATTCCTTACAAAATTGTTGAGGTCAATCCTCTCAGCAAGAAGGAAATTAAATGGTCAGACTACAAGAAGGTCCCTATATTGCTGGTTGATGGTGAACAGATGGTCGACTCATCAGCAATCATTGATAACTTGTCCCAAAAGATACGTTCTGAGCTCCCGGATGACTGTCTTCCTGATGTTAGTGAAGAAAAATATTGGCGAGGGTGGGTGGACAATCACTTGGTGCATGTCTTGTCACCAAATATCTATAGATCTCCCTCTGAGGCTCTCGAGTCGTTTGATTACATTACAAGCCATGGTAATTTCAGCTTCTTTGAGAAGATGACTGGCAAGTATGTTGGAGCTGCAGCTATGTATTTCATATCAAAGAAATTGAAGAAAAAATACAATATAGTTGATGAACGCGCAACCTTGTATGAAGCTGCGGAAACATGGCT
>HS077274|Panax ginseng||KYERRC001_14-G12-T3.ab1 Panax ginseng in vitro-cultured adventitious root cDNA library Panax ginseng cDNA, mRNA sequence.
GCACGAGGCACCACCTCTCTCTCTCTCTCTCTCATCGGAAAAAAATTTATACTCTCTATTCAACCTGCCACCATGGATCCCTACAAGTACCGCCCTTCAAGTGCTTTTAATTCCCCTTACTGGACAACAAATTCCGGCGCTCCAGTTTGGAACAACAATGCATCATTGACTGTGGGAACTAGAGGCCCAATCCTCCTTGAGGATTATCATTTGGTGGAGAAACTTGCTAATTTTGATAGGGAGCGGATCCCTGAACGAGTTGTCCACGCAAGGGGTGCCAGTGCCAAGGGTTTCTTTGAGGTCACCCATGATATTTCTCAACTTACATGTGCTGATTTTCTTCGAGCCCCTGGCGTTCAGACACCTGTAATTGTTCGTTTCTCCACTGTTATCCATGAGCGTGGAAGCCCTGAAACCCTCAGGGACCCCCGAGGTTTTGCAGTGAAGTTCTACACCAGAGAGGGTAACTTTGATTTGGTGGGAAACAATTTCCCTGTCTTCTTCGTTCGTGATGGAATGAAATTCCCAGACATGGTCCATGCTCTTAAACCCAATCCGAAGTCTCACATTCAAGAGAACTGGAGAATCTTGGACTTCTTCTCCCACCACCCAGAGAGTTTGCACATGTTCACCTTCCTCCTGGATGACATAGGTATTCCACAAGATTACAGGCACATGGAAGGCTCAGGTGTTAACACTTACAGTTTGATTAATAAGGCTGGGAAAGCACACTATGTGAAGTTTCACTGGGAGCCTACCTGCGGAGTGAAGAGTTTGTTGGAGGAAGAAGCCATCAAGGTTGGAGGAGCTAATCACAGCCATGCCACCCAAGATCTATATGA
>HS079868|Panax ginseng||KYERRC001_42-E06-T3.ab1 Panax ginseng in vitro-cultured adventitious root cDNA library Panax ginseng cDNA, mRNA sequence.
GCACGAGGTTTCATTTCTCTCTCAACCATGGCAGAGTCATGGAAATCCAAACCGACCTTTCTCTCATATCTCCTTCAGTTTTGCTTCTTCTCTCTCCTCTCTTCCGCACTCGCAATCTCTCCTGTGAATGGTGATGCTTACACAATAAATGGCCAGGTGAAGATTCCAGGAGTTGCTGCAAAAGGATTTGGTCTACCGGTGAAAGTATCAAATGTCAAAGTCATATTAAATGGTGGTCAACAAGTTACTTTTCTCAAGCCTGACGGATATTTTTCATTCCATAATGTGCCAGCGGGGACTCATCTAATCGAAGTGGCTGCGATCGGTTATTTCTTTTCCCCAGTCCGTGTTGATGTCAGCGCCAGAAACCCCGGTAAGGTTCAAGCAGCACTGACAGAGAATAGGAGGGGCCTCAGTGAGCTGGTGTTGGAACCTTTGAGAGAGGAACAGTATTATGAGATAAGGGAACCCTTCAATATAATGTCTCTCGTGAAAAGTCCAATGGGTCTCATGGTTGGATTTATGCTAATTGTGATGTTCTTAATGCCCAAACTAGTGGAGAACATGGATCCTGAAGAAATAAGACGAGCTCAAGAAGATATGAGGAACCAAGCGGTTCCCTCTATTGCCAATTTGTTGCCTGGAGCTGCAAGGAGCAATTAGTTAAGAGGCATAAAGTCTCTGCTGTTCCCCCCTCCCCCACCCTTCCTTTCTTCTTTTTTTTCTGTTGCATGCTCTTTCACTGAAAAATAGTTTAGCAATCTTTAGGTGGATTTGTAACAAGATGTTC
>HS079811|Panax ginseng||KYERRC001_41-H09-T3.ab1 Panax ginseng in vitro-cultured adventitious root cDNA library Panax ginseng cDNA, mRNA sequence.
GCACGAGGCCCCATTTTCTCGTTTGATAAGCTTTTCGGTTGAACTATGGGTAACGTTAAGTTTCACATTAACATTGTGGTTATAGGCCATGTCGACTCTGGAAAGTCTACCACCACAGGTCACTTGATCTACAAGCTTGGTGGTATTGACAAGCGTGTTATTGAAAGGTTTGAGAAGGAGGCTGCTGAAATGAACAAGAGGTCGTTCAAGTATGCCTGGGTGCTTGACAAGCTCAAGGCTGAGCGTGAACGTGGTATTACCATTGATATTGCCTTGTGGAAGTTTGAAACCACCAGGTACTACTGCACGGTCATTGATGCCCCTGGACATCGTGACTTTATCAAGAACATGATTACTGGTACCTCACAGGCTGACTGTGCCGTCCTCATCATTGACTCCACCACTGGTGGTTTTGAAGCTGGTATCTCTAAAGATGGTCAGACCCGTGAGCATGCTTTGCTTGCTTTCACCCTTGGTGTCAAACAAATGATTTGCTGTTGTAACAAGATGGATGCTACCACCCCAAAATACTCTAAAGCAAGGTACGAAGAAATTGTGAAGGAAGTTTCTTCATACTTGAAGAAGGTTGGATACAACCCAGATAAAATTGCTTTTGTCCCCATCTCCGGATTCGAGGGAGACAACATGATTGAGAGGTCCACAAACCTTGACTGGTACAAGGGCCCAACACTCCTCGAGGCCCTTGACTTGATTAATGAACCCAAGAGGCCCTCTGACAAGCCCCTCCGTCTCCCACTTCAGGATGTGTACAAGATTGGTGGTATTGGAACTGTGCCAGTGGGAAGAGTTGAGACTGGTACTCTCAAGCCAGGAATGGTCGTTACCTTTGGCCCTACTGGTCTCAC
>HS079808|Panax ginseng||KYERRC001_41-H06-T3.ab1 Panax ginseng in vitro-cultured adventitious root cDNA library Panax ginseng cDNA, mRNA sequence.
GCACGAGGATCCTATAAGTCATCAATGCACACTATATTGGAGCTAAAATCTTTACATTCATAGGCGTAGATCAAAATCGAGAGAGAGAGCTAGAACCTCTGAGTAATTCAATATTCAATCTAGGGTTTATTTAGAAGGTTAAAATCAGAGACGAAAAGTGTCAGGCAAACAAATGTATAGTGGATCAAGCGACGGCGAAGGCCACGATGCATCGGCGCCGAAGAAGATCTCGCCGGCGTCTTCCATGCTTTGGGTCCGCAATCTTCGCCGGTTCATCGGATCCGGCGCCGGTCTCGGCTCTGAAGCCTTGATGGAGCTTGAAACAAAAAGAATTTTGCTAGATATTTTTAAAGAAAAACAACAAAAGAGTGCAGAGGCTGGATCAATTCCAAGCTTTTATAAGAAGAAACCTGAAGACGGTTCCATCAGTCACAGGGTCCAGAGGCTAGCAAAATATCGTTTTCTAAAGAAGCAATCTGATCTTTTGCTAAATGCCGATGATCTGGATGCTATGTGGGTGTGTTTGAGAGAAAATTGTGTCATTGATGATGCCACTGGTGCTGAAAAGATGAATTATGAAGACTTTTGCCACATTGCCTCTGTATGTACAGACCAGATAGGCCCTAAATGTCGTCGGTTTTTCAGCCCTTCAAATTTCATGAAGTTTGAGAAAGACGAGTCAAGAAGGATCGCCATTCTGCCATTTTACCTTTATGTGATGCG
>HS079769|Panax ginseng||KYERRC001_41-E02-T3.ab1 Panax ginseng in vitro-cultured adventitious root cDNA library Panax ginseng cDNA, mRNA sequence.
GCACGAGGCTCCATTTTTTCGTTTGCTAAGCTTTTCGGTTGAACTATGGGTAACGATAAGTTTCACATTAACATTGTGGTTATAGGCCATGTCGACTCTGGAAAGTCGACCACCACAGGTCACTTGATCTACAAACTTGGTGGTATTGACAAGCGTGTTATTGAAAGGTTTGAGAAGGAGGCTGCTGAGATGAACAAGAGGTCGTTCAAGTATGCTTGGGTGCTTGACAAGCTCAAGGCTGAGCGTGAACGTGGTATTACCATTGATATTGCCTTGTGGAAGTTTGAAACCACCAGGTACTACTGCACAGTCATTGATGCCCCTGGACATCGTGACTTTATCAAGAACATGATTACTGGTACCTCACAGGCTGACTGTGCTGTCCTCATCATTGACTCCACCACTGGTGGTTTTGAAGCTGGTATCTCTAAAGATGGTCAGACCCGTGAGCATGCTTTACTTGCTTTCACCCTTGGTGTCAAACAAATGATTTGCTGTTGTAACAAGATGGATGCCACCACCCCAAAATACTCTAAAGCAAGGTACGAAGAAATTGTGAAGGAAGTTTCTTCATACTTGAAGAAGGTTGGATACAACCCAGAAAAAATTGCTTTTGTCCCCATCTCCGGTTTCGAGGGAGACAACATGATTGAGAGGTCCACAAACCTTGACTGGTACAAGGGCCCAACGCTCCTCGAGGCCCTTGACTTGATTAATG
>HS077235|Panax ginseng||KYERRC001_14-D07-T3.ab1 Panax ginseng in vitro-cultured adventitious root cDNA library Panax ginseng cDNA, mRNA sequence.
GCACGAGGGAACCTTTCAACAGTTTTTCGTTTGCTAAGCTTTTCGGTTGAACTATCGGGTAAGGAAAAGTTTCACATTAACATTGTGGTTATAGGCCATGTCGACTCTGGAAAGTCGACCACCACAGGTCACTTGATCTACAAACTTGGTGGTATTGACAAGCGTGTTATTGAAAGGTTTGAGAAGGAGGCTGCTGAGATGAACAAGAGGTCGTTCAAGTATGCTTGGGTGCTTGACAAGCTCAAGGCTGAGCGTGAACGTGGTATTACCATTGATATTGCCTTGTGGAAGTTTGAAACCACCAGGTACTACTGCACAGTCATTGATGCCCCTGGACATCGTGACTTTATCAAGAACATGATTACTGGTACCTCACAGGCTGACTGTGCTGTCCTCATCATTGACTCCACCACTGGTGGTTTTGAAGCTGGTATCTCTAAAGATGGTCAGACCCGTGAGCATGCTTTACTTGCTTTCACCCTTGGTGTCAAACAAATGATTTGCTGTTGTAACAAGATGGATGCCACCACCCCAAAATACTCTAAAGCAAGGTACGAAGAAATTGTGAAGGAAGTTTCTTCATACTTGAAGAAGGTTGGATACAACCCAGAAAAAATTGCTTTTGTCCCCATCTCCGGTTTCGAGGGAGACAACATGATTGAGAGGTCCACCAACCTTGACTGGTACAAGGGCCCAACGCTCCTCGAGGCCCTTGACTTGATTAATGAAC
>HS077197|Panax ginseng||KYERRC001_14-A02-T3.ab1 Panax ginseng in vitro-cultured adventitious root cDNA library Panax ginseng cDNA, mRNA sequence.
GCACGAGGGACCACTTCAGCGATCAATCGGATTTCAGATCATTGAAGTAAAAAAACTGTCATCAACTTTCAGCGGCGATGAAACTGCTCCGTTCTTCGGCTTCCTCGGAGCCGCTGCAGCCCTTGTTTTCTCTTGTATGGGAGCGGCGTATGGGACGGCGAAGAGTGGTGTAGGTGTGGCGTCGATGGGAGTAATGAGGCCGGAGCTGGTGATGAAGTCAATTGTGCCTGTTGTTATGGCCGGAGTGTTAGGTATTTACGGTTTGATTATAGCGGTCATAATTAGTACTGGAATTAACCCTAAAGCCAAATCATATTACCTTTTTGATGGTTATGCGCACCTTTCTTCTGGTCTGGCTTGTGGCCTTGCTGGCCTTTCGGCTGGAATGGCTATTGGGATCGTTGGGGATGCTGGTGTTAGAGCAAATGCACAACAGCCTAAGCTTTTTGTTGGAATGATTCTTATCCTTATCTTTGCGGAGGCATTGGCTCTTTATGGACTCATTGTTGGTATCATCCTTTCTTCGCGTGCTGGGCAATCCCGAGCTGATTAGAGAAAAACTTTCCTCCAAATTCATATTCTGGTTGTTGTCATCATGTTGCTTTTCTCAGGCCAGGAAGGCTTGTCAGGTGGAAGTCTTCTCAATTTAAGGTCATTCTTCATCATATCATAACTTTTTTTCCTGTTTATAATTTTGTGAGCAATTTCATCTCAAAATAAAGGCTCATGAGGTTAGCTTTGTTTATTTGCCTAATTATGTATTTCATGGACATAG
>HS077164|Panax ginseng||KYERRC001_13-F01-T3.ab1 Panax ginseng in vitro-cultured adventitious root cDNA library Panax ginseng cDNA, mRNA sequence.
GCACGAGGCTTTTTTCCCCTCCTGGCTCTCTGTTTATTCTTCTCCGACTCTAGCTCTTTACCTTCCATTTATGCTCGACTGAGAATTAACATATATCTCCATTAATGGCGGCGGAAGGTTCTCTTCTTGTGAGCTCCGTTACGGAGCTAAAGATAAAGGAGAAGCAGCAGAAGAAAGCGAAATCAGGAGGATTTGAGTCATTGGGTCTGAGTATTAATGTGTTTCGAGGAGTGAAGCGAAAGGGCTACAAAGTCCCAACTCCAATACAGCGCAAAACGATGCCTCTCATACTTTCCGGATCCGATGTTGTCGCCATGGCTCGAACTGGGTCGGGCAAAACGGCGGCGTTTTTGGTCCCTATGCTTGAGAAGTTGAAGCAGCATGTGCCTCAGGGTGGGGGTGTTAGGGCACTTATTTTGTCACCCACTAGAGATTTGGCGCTTCAGACGCTAAAGTTTGCGCAAGAACTGGGTCGATTTACGGATCTTCGTATTAGTTTACTGGTTGGTGGTGATAGCATGGAAAGTCAATTTGAAGAATTGGCACAGAACCCTGACATCATAATTGCAACTCCTGGTAGGCTCATGCACCTTTTGTCTGAGGTTGAGGATATGTCATTCCGTAGTGTGGAGTATGTGGTTTTTGATGAAGCTGATTCTCTCTTTAGCATGGGCTTTGCGGAGCAACTGCATCAAATCCTTACACAACTAAATGATAATCGTCAAACCTTGCTTTTCAGTGCAACTTTACCAAGTGCCCTTGCTGAATTTG
>HS079667|Panax ginseng||KYERRC001_40-D04-T3.ab1 Panax ginseng in vitro-cultured adventitious root cDNA library Panax ginseng cDNA, mRNA sequence.
GCACGAGGATCCGTTATCAAATTAGAAGAAAATGTCAATTACAAGTTCAAATAAACACCCTCAAGTTATTACCTGCAAAGCTGCGGTATCATGGGGAGTTGGAGAGGCAATGGTAATAGAGGAGGTGGAAGTGAGTCCACCCCACTTATCGGAGATACGCATCAAGGTCGTCTCCACCGCCCTCTGCCGCAGTGATTTTAATGCTTGGCTCTCTCAGGCAAACCCTCCTTTATTTCCTCGGATATTTGGCCATGAAGCATCAGGGATTGTTGAGAGTGTTGGAGAAGGAGTAACAGAATTTATAAGGGGGGATCATGTGCTTACATTATTTACTGGAGAATGCATGAGCTGCAGACAGTGTACTTCAAGTAAAAGCAACATGTGCCAAGTACTGGGTTTAGAACGAAAAGGTGTAATGCATAGTGACCAGAAAACACGCTTCTCAGTAAGAGGGAAACCCATTTATCATTATTGTGCAGTTTCAAGTTTCAGTGAGTTTACAGTAGTGCACTCTGGATGTGCTGTCAAAGTCAACTCCATTGCACCTCTGGAGAAAATATGCCTCCTTAGTTGCGGAGTGGCATCAGGTCTGGGTGCAGCTTGGAATGTTGCTGATATTTCTAAAGGATCAACAGTTGTAATTTTTGGTCTGGGAACTGTAGGCCTTTCGGTTGCACAAGGAGCCAAAATAAGGGGAGCATCTCGAATAATAGGTGTGGAACCTAATCCTGAAAAGAGTGAAAAAGCAAAGGCTTTCGGAATAACAGACTTTGTTAATCCAAATGACTATAATGAACCTATTCAACAGGTCATTAAGCGTATTACTGATGGCGGAGCAGACTATTCATTTGAATGTGTA
>HS079663|Panax ginseng||KYERRC001_40-C12-T3.ab1 Panax ginseng in vitro-cultured adventitious root cDNA library Panax ginseng cDNA, mRNA sequence.
GCACGAGGCGCACTGAGAGGCTTGCAAAAAACCCAAAAAATGGCAGAATCACTACTTCTGAAGGGAACAATGAGGGCTCACACCGACTGGGTAACGGCCATTGCCACCCCAATCGACAACTCCGACATGATCGTCACTTCCTCCCGTGACAAATCCATCATTGTCTGGAAACTCACAAAGGAGGATAAAACCTACGGCGTCGCTGTACGCCGTTTGGAAGGCCACTCCCACTTCGTGCAAGACGTCGTCCTCTCATCCGACGGTCAGTTTGCCCTCTCCGGATCCTGGGACGGCGAGCTCCGCCTCTGGGACCTCGGCACCGGTGTTACCGCCCGCCGATTCGTCGGCCACACCAAAGACGTTCTCTCCGTTGCATTCTCCATCGACAACCGTCAGATCGTGTCCGCATCCCGTGACCGTTCGATCAAACTGTGGAACACTTTGGGCGAATGCAAGTACACCATCCAGGACGGCGATGCCCATAACGACTGGGTCAGCTGCGTGCGGTTCAGCCCGAACACGTCCCAGCCGACTATCGTCTCTGCTTCGTGGGACAAAACAGTCAAAATCTGGAATTTGACCAACTGTAAGCTGAGGTCCACACTGGCGGGTCACAATGGGTATGTGAATACAGTTGCGGTTTCACCTGATGGGTCACTGTGCGCTAGTGGGGGGAAAGATGGGGTGATTTTGCTGTGGGATTTGGCTGAGGGGAAGAAACTGTATTCGTTGGATGCTGGTTCAATTGTTCATGCTTTGTGTTT
>HS077127|Panax ginseng||KYERRC001_13-B08-T3.ab1 Panax ginseng in vitro-cultured adventitious root cDNA library Panax ginseng cDNA, mRNA sequence.
GCACGAGGGACAGAGGGAGGGAGACGCAGCTTATCGAACAAAGCAACCATGGCTAGAGGTTTGAAGAAGCATTTGAAGAGGCTCAATGCCCCTAAGCATTGGATGCTCGATAAACTTGGTGGTGCATTTGCTCCCAAGCCTTCATCTGGACCCCATAAATCCAGGGAATGCCTGCCTTTGATTCTTATTTTGCGAAACAGGCTGAAGTATGCTCTAACTTACCGTGAAGTCCAATCCATCTTGATGCAACGACATGTTCTTGTTGATGGGAAGGTTAGGACGGATAAGACCTATCCAGCTGGTTTCATGGATGTTGTATCAATTCCCAAGACTAATGAGAATTTCCGTCTCCTCTATGACACAAAGGGTAGATTCCGCCTACACTCGGTCAGGGATGAGGAGGCAAAGTTTAAGTTGTGCAAAGTTAGGTCAGTTCAGTTCGGTCAGAAAGGCATTCCGTACATCAATACCTATGATGGGCGTACTATCCGTTATCCAGACCCGCTCATTAAGGCCAATGACACCATCAAACTTGACTTGGAGGCAAACAAGATAGCTGATTTCATTAAGTTCGATGTTGGAAATGTTGTCATGGTGACTGGGGGGAGGAATACTGGGCGAGTTGGAGTTATCAAGAACAGGGAGAAACATAAGGGGAGCTTCGAGACTGTTCACATTCAGGATTCCCTTGGTCACGAGTTTGCTACTCGTCTAGGCAATGTTTTTACCATCGGAAAAGGTACAAAGCCATGGGTGTCTCTTCCCAAGGGCAAGGGTATCAATTAACCATCATTGAGGAGGCCAGGAAGAGGATGTTGCCCAGTCTGC
>HS077059|Panax ginseng||KYERRC001_12-D03-T3.ab1 Panax ginseng in vitro-cultured adventitious root cDNA library Panax ginseng cDNA, mRNA sequence.
GCACGAGGGCCCTTTTCTCGGTGCTAGGGTTTTGAGTTTGAAATTCGTTGCGCTGCTACTTGCTTCATTATGGGTAAGGAGAAGGTTCACATCAACATTGTGGTCATTGGCCATGTGGATTCTGGAAAGTCAACCACCACTGGTCATCTCATCTATAAGCTGGGAGGTATTGACAAAAGGGTGATTGAGAGGTTTGAGAAGGAAGCTGCTGAAATGAACAAGCGTTCATTCAAGTATGCCTGGGTTCTTGACAAGCTCAAGGCTGAGCGTGAGCGCGGTATCACCATTGATATTGCTCTGTGGAAGTTTGAGACCACCAAGTACTACTGCACTGTCATTGATGCCCCTGGACATCGTGATTTCATCAAGAATATGATTACTGGAACTTCCCAGGCAGACTGTGCTGTGCTTATCATTGACTCCACCACTGGAGGTTTTGAAGCTGGTATCTCAAAGGATGGGCAGACCCGTGAACATGCCTTGCTTGCTTTCACACTTGGTGTCAAGCAGATGATCTGTTGCTGCAATAAGATGGATACCACAACTCCCAAGTACTCCAAGGGTAGGTACGAAGAAATTGTGAAGGAGGTGTCATCCTATTTGAAGAAGGTGGGATACAACCCTGATAAGATTGCCTTTATTCCCATCTCTGGGTTTGAAGGCGATAACATGATTGAGAGGTCTACAAACCTTGACTGGTACAAGGGTCCTACCCTACTTGAAGCCCTTGACCAGATCACTGAG
>HS079629|Panax ginseng||KYERRC001_39-H12-T3.ab1 Panax ginseng in vitro-cultured adventitious root cDNA library Panax ginseng cDNA, mRNA sequence.
GCACGAGGGGCAGTACGCTTTCAGAGGCGAAAGGCCATGGGGAGATACCGTCTGTGATCCATGGATCTCCGATCGGGAAACCGTATCCAAGCTCCGTGGCTAGTCTGCGCTCTTTGGACTTTTCAAACTTAGCGAACTGAAACATCTGAGTAGCTAAAGGAAGGGAAATCAACCGAGACTCCGTTAGTAGCGGCGAGCGAGAGCGGATTGGGGGTTTGAAGAAAAACAAACACGAAGCTTCGTTCCGATCCTTTCTATTCTAGTCGAGTTACTACGTTCCTCAGCAAAGTGTTCACTTCTTTTTCGCCAGGTTTCATTCGATTTTTTTTTGATTGGATGATGGAAAAACCAGCAAGCTACGGCTTCAAAGCTGACCTTATTATTATGAAAAGGAGAAAGGGCTTTTTATAGAGAGAGGTTGAGTAAGGGGGGCGGAGCTTGAAGAGCGAAGCGAGCCGCGCTAGCCTATTACGTTTTTCAGCAGCAAGCTACGGTCTAACGACCCCCTAACCTAGGTTGGGGCGAAAACTCCAAAACTCGGGTTCCGATCCTATATATTCTAGTCCCGTTCCAAACCTTTCTCTAATAAGAAGGTCCGCTTTCAAGCCCCTTGACTTTCTATTCTATTAGTCAAGGGCGCAGTGAACTGTAATTGTGAAAAGGTTGGAAGATCTGGCCAAAGAAGGTGATAGCCCTGTAGATTCGTTCCCATGGTTCGATCCTTCCCAGTAAAACGCGGCGTGTTCGAATTCTGATCGCTTTTACGCGAGA
>HS079609|Panax ginseng||KYERRC001_39-G04-T3.ab1 Panax ginseng in vitro-cultured adventitious root cDNA library Panax ginseng cDNA, mRNA sequence.
GCACGAGGGCCCCTTTACGTCTTCAATTTTTTCCAGAGATGGCGGATCGATTGACGTGAATTGCAATTGTGAGTTCTGATCGATGTAAGCCGAAAAAGTGTCGGCAGGAATGCAAAAAGAGTTGCCCTGTTGTTAAAACTGGTAAACTATGTATTGAGGTCACTCCTGCAGCCAAAATTGCTTTCATCTCTGAGGAATTGTGCATTGGATGTGGTATATGTGTTAAGAAATGCCCATTTGAAGCAATTCAGATCATTAATCTACCCAAAGATTTGGATAAGGATACCACTCACCGTTATGGCCCCAACACCTTCAAATTACACAGGTTACCAGTTCCGAGGCCAGGGCAGGTTCTTGGTTTGGTTGGGACAAATGGCATTGGGAAGTCGACTGCCCTTAAAGTTCTGGCTGGAAAATTGAAACCTAATCTGGGTCGTTTCAATAACCCTCCTGATTGGCAAGAAATTTTGACATACTTTCGAGGATCTGAGTTGCAGAATTATTTCACCCGTATTTTGGAAGATAATTTGAAGGCAATCATCAAGCCACAATATGTTGACCACATTCCGAAAGCAGTCCAAGGAAATGTTGGGCAAGTGCTGGACCAAAAAGATGAGAGGGACATGAAAGCAGAACTTTGTTTTGACCTTGAACTGAATCAGGTTATAGATCGTAATGTGGGAGACTTATCTGGCGGGGAGCTTCAGAGGTTTGCTATTGCTGTTGTAGCCATACAGAATGCAGAGATATATATGTTTGACGAACCCTCGAGTTATCTTGATGTGAA
>HS079568|Panax ginseng||KYERRC001_39-C11-T3.ab1 Panax ginseng in vitro-cultured adventitious root cDNA library Panax ginseng cDNA, mRNA sequence.
GCACGAGGATCCCTCTTGGCTGCTTCTCTCTAGCGGCTACTGTTTTACAGCAAAAAGGTTTCTTCAAAGTTATTAGCAATTCATTATGGGTAAGGAAAAGTTTCACATTAACATTGTGGTCATTGGCCATGTGGATTCTGGTAAGTCAACCACCACTGGTCATCTCATCTACAAGCTCGGGGGTATTGACAAACGTGTCATTGAGAGGTTCGAGAAAGAAGCTGCTGAGATGAACAAGCGTTCATTCAAGTATGCGTGGGTGCTTGACAAGCTCAAGGCCGAGCGTGAGCGTGGTATCACTATTGATATTGCTCTGTGGAAGTTTGAGACCACCAAGTACTACTGCACAGTCATTGATGCTCCTGGACATCGTGACTTCATTAAAAACATGATTACTGGAACTTCCCAGGCTGATTGTGCTGTCCTTATCATTGACTCCACTACCGGAGGTTTTGAAGCTGGTATCTCCAAGGATGGGCAGACCCGTGAGCATGCTTTGCTTGCTTTCACCCTTGGTGTCAAACAGATGATCTGTTGCTGCAATAAGATGGATGCGACAACCCCCAAGTACTCCAAGTCTAGGTTCGAAGAAATTGTTAAGGAAGTGTCTTCATATTTAAAGAAGGTGGGATACAACCCTGAAAAGATTGCATTTATCCCCATCTCTGGATTTGAAGGCGACAACATGATTGAGAGGTCTAACAACCTTGATTGGTACAAGGGCCCTACCCTTCTTGAAGCCCTTGACCTGATCACTGAGCCCAAGAGACCCTCCG
>HS079548|Panax ginseng||KYERRC001_39-B03-T3.ab1 Panax ginseng in vitro-cultured adventitious root cDNA library Panax ginseng cDNA, mRNA sequence.
GCACGAGGCCCCTCTTCGGTATGAGCCGGCGGCTTCATTCGGAGTGATTGTTTCTGTTGATTCCAACATTTCTTATGACAGCTCCGGGAAGCACTTGCTCGCTCCGGCGTTAGAAAAGATAGGCGTCTGGAACGTGCGTCAGGGGATTTGTACCAAAACCCTATCTCCTTCCACAACCTCTCGTGGCCCTTCTCTCGCTGTTACCTCCATTGCTTCCTCTTCTTCCTCCCTGATAGCAAGTGGCTATGCTGATGGTAGTATAAGAATTTGGGATTGTGAGAAAGGAACCTGCGAGACCACGTTGAATGGACATAAAGGAGCTGTGACCACCCTTCGATTCAACAAGCTTGGATCTTTGCTTGCATCTGGAAGCAAAGATAATGATATTATTTTGTGGGACGTGGTTGGTGAGGCTGGACTTTTCCGCCTTCGTGGACACCGAGACCAGGTTACTGACCTTGTATTCTTGGATTCGGGCAAAAAACTTGTAAGTTCATCTAAGGACAAGTTTTTAAGGGTATGGGATATTGAAACACAGTACTGTATGCAAATTATCAGCGGTCATCATAGTGAAATTTGGTCCCTGGATACTGATCCTGAGGAGAGATATTTGGTCACTGGATCTGCAGACTTGGAGCTCAGGTTTTATAATATAAAGAATAATTTGGTGGATGGAGAATCAGTTTCTGATGTCAATGAAACTGAGGTGAATAATGGTGATTCTTCCACTCGAAACAAATGGGAAGTCTTGAAACTGTTTGGTGAAATTCAGCGACAGACCAAGGATAGAGTTGCAACAGTAAGATTCAATAAGTCTGGGAATCTGCTGGCTTGCCAAACTGCA
>HS079544|Panax ginseng||KYERRC001_39-A11-T3.ab1 Panax ginseng in vitro-cultured adventitious root cDNA library Panax ginseng cDNA, mRNA sequence.
GCACGAGGCTCCTTCTTCTTCTTCTTCTTTATCCCAATTGACACAGGTTCATTTCGGTTGTCCGAGCCCCTGATAATAACTGTTGTTTAAAACCCTAATTTCTATATCTACGTATATACATATAGATAAGATTACATATACATATATATAGTGAGAGAAAGGAAGAGATGCGCTAATAGATGGGTGCAGCGGGGTCGAAACTGGAGAAAGCACTGGGAGAGCAGTTCCCTGAAGGTGAACGTTACTTCGGACTCGAGAATTTTGGCAACACTTGCTACTGTAATAGCGTCTTGCAGGCTCTTTACTTCTGTGTTCCATTCCGTGAACAGTTACTAGAATATTATTCAAATAACAAAAGTCTTGCTGATGCAGAAGAAACTCTGTTGACATGCTTGGCAGACCTATTTATGCAGATAAGTTCACAAAAGAAGAAGACAGGTGTTATTGCTCCAAAACGCTTTGTACAGAAACTGAAGAAGCAAAATGAGATTTTTCGCAGCTACATGCACCAGGATGCACATGAATTCTTGAATTATTTGCTAAATGAACTTGTTGACTTGCTGGAGAAAGAGGCTCGAAAGGCAAAAGGTGATCCAGAAACTTCATCGCCGTCTGAAAATATTGCAAATGGACCGAGAAATGGTCTTCCTAATGGTGTGCAAAAAGAGCCTCTTGTAACCTGGGTCCACAAAAATTTTCAAGGTATACTCACAAATGAAACAAGGTGCTTACAATGTGAGACGGTAACGGCAAGAGATGAAACTTTCTTGGACTTGAGCCTTGATATTGAGCAGAACAGTTCAATCACAAGTTGTCTGAAAAATTTCAGCTCGACTGAGACTTTAAATGCG
>HS077015|Panax ginseng||KYERRC001_11-H05-T3.ab1 Panax ginseng in vitro-cultured adventitious root cDNA library Panax ginseng cDNA, mRNA sequence.
GCACGAGGATCCATTTTATCTATCTAGCACAGATTTGATCAGATCCGATCAGATACTCAACAATGGCGAAAGAACCAGCTCGAGTTCTTGTTACTGGTGCTGCAGGACAAATTGGATATGCTCTTGTGCCCATGATTGCTAGAGGTGTGATGTTGGGACCCGATCAGCCTGTGATCCTCCACATGCTTGATATTCCACCTGCTGCAGAGGCATTGAATGGAGTGAAAATGGAGTTGGTGGATGCTGCATTTCCTCTCCTTAAAGGTGTTGTTGCTACAACTGATGTTGTTGAGGCATGTACTGGCGTCAATGTTGCAGTTATGGTTGGCGGGTTCCCTAGGAAAGAAGGCATGGAAAGGAAAGACGTGATGACAAAGAATGTGTCCATTTACAAGTCCCAAGCTTCTGCTCTTGAGAAGCATGCTGCTGCAAACTGCAAGGTCTTGGTTGTTGCAAACCCTGCGAACACCAATGCGTTGATCCTGAAGGAATTCGCACCATCGATCCCAGAGAAAAACATTACTTGTCTTACAAGGTTAGACCATAACAGGGCCCTTGGTCAAATCTCAGAGAGACTGAATGTTCAAGTATCAGATGTTAAGAATGCTATCATCTGGGGAAATCACTCTTCAACACAGTATCCTGATGTAAACCATGCAACTGTTGGAGACAAGCCTGTCAGAGCTCTTGTTGCTGACAATGAATGGTTGAATGGAGAATTCATCAAAACTGTCCAACAGCGTGGTGCTGCGATTATCAAAGCTAGAAAGCTCTCTAGTGCATTATCAGCTGCTAGTGCTGCTTGTGACCACATACGTGATTGGGTTCTTGGAACACCAGAGGGAACT
>HS077012|Panax ginseng||KYERRC001_11-H02-T3.ab1 Panax ginseng in vitro-cultured adventitious root cDNA library Panax ginseng cDNA, mRNA sequence.
GCACGAGGCACATATTCAACAATGGCGAAAGAACCAGCTCGAGTTCTTGTTACTGGTGCTGCAGGACAAATTGGATATGCTCTTGTGCCCATGATTGCTAGAGGTGTGATGTTGGGACCCGATCAGCCTGTGATCCTCCACATGCTTGATATTCCACCTGCTGCAGAGGCATTGAATGGAGTGAAAATGGAGTTGGTGGATGCTGCATTTCCTCTCCTTAAAGGTGTTGTTGCTACAACTGATGTTGTTGAGGCATGTACTGGCGTCAATGTTGCAGTTATGGTTGGCGGGTTCCCTAGGAAAGAAGGCATGGAAAGGAAAGACGTGATGACAAAGAATGTGTCCATTTACAAGTCCCAAGCTTCTGCTCTTGAGAAGCATGCTGCTGCAAACTGCAAGGTCTTGGTTGTTGCAAACCCTGCGAACACCAATGCGTTGATCCTGAAGGAATTCGCACCATCGATCCCAGAGAAAAACATTACTTGTCTTACAAGGTTAGACCATAACAGGGCCCTTGGTCAAATCTCAGAGAGACTGAATGTTCAAGTATCAGATGTTAAGAATGCTATCATCTGGGGAAATCACTCTTCAACACAGTATCCTGATGTAAACCATGCAACTGTTGGAGACAAGCCTGTCAGAGCTCTTGTTGCTGACAATGAATGGTTGAATGGAGAATTCATCAAAACTGTCCAACAGCGTGGTGCTGCGATTATCAAAGCTAGAAAGCTCTCTAGTGCATTATCAGCTGCTAGTGCTGCTTGTGACCACATACGTGATTGGGTTCTTGGAACACCAGAGGGAAACTGGGTTTCTATGGGTGTATACTCTGATGGCTCATACAATGTGCCTGCTGGGCTTATTTATTCTTTCCAGTGACGTGTGCCCATGGAGAATGGAAAATGTTCAAGGACTTTCCATTGA
>HS077008|Panax ginseng||KYERRC001_11-G10-T3.ab1 Panax ginseng in vitro-cultured adventitious root cDNA library Panax ginseng cDNA, mRNA sequence.
GCACGAGGCCCATTCGCTCCCCCGTGCCGTAGCTAGGTGGGTCTCTTTCTCTCTCCTTGCGATTAGATTAACTTCTCTACTGACTGCTCCAAAAAAAATTTAAGTGTTTTTGGGTTTTCCAGAAAAAGGGATTTCGTTTTTTTCTCTTCTTGATTTGAAGTACAACGAACCAAGAAGAAGAATCATCCTAGTTGAAGAACAAGAAAGAAGAGTCGATACCCAAAAGGGGTTCCTCTTAATTGAGGAAGAAAGATCTGGAAAATGAGCGCTTCCAGGTTCATAAAGTGCGTGACTGTTGGTGATGGTGCTGTTGGTAAAACCTGTATGCTCATTTCCTACACCAGCAACACTTTCCCTACGGATTACGTGCCGACTGTCTTTGACAATTTCAGTGCAAATGTGGTTGTAGATGGGAGCACCATCAACCTAGGGTTATGGGATACTGCTGGTCAAGAGGATTACAATAGATTGAGACCTTTAAGCTATCGCGGAGCAGATGTATTTCTTCTTGCATTTTCTCTCATTAGCAAGGCTAGCTATGAAAATGTTGCAAAGAAGTGGATACCTGAACTTAGGCATTATGCACCTGGAGTTCCAATAATTCTTGTTGGAACAAAGCTTGATCTGAGGGATGACGAGCAGTTCTTTGTAGACCACCCTGGTGCAGTACCCATTACTTCAGCTCAGGGAGAGGAGCTGAGGAAACTGATTGGAGCTCCTGCCTACATTGAGTGTAGTTCAAAGACACAGCAGAACGTGAAGGCAGTTTTTGATGCGGCCATCAAGGTCGTGCTGCAACCACCCAAGCAAAAGAAAA
>HS076950|Panax ginseng||KYERRC001_11-B11-T3.ab1 Panax ginseng in vitro-cultured adventitious root cDNA library Panax ginseng cDNA, mRNA sequence.
GCACGAGGCTCCTTATACCACCTGGCTGCTTCTCTCTAGCGGCTACTGTTTTAGAGCAAAAGGTTTCTTCAAAGCTTTTAGCATCTCATTATGGGTAAGGAAAAGTTTCACATTAACATTGTGGTCATTGGTCATGTGGATTCTGGTAAGTCAACCACCACTGGTCATCTCATCTACAAGCTCGGGGGTATTGACAAACGTGTCATTGAGAGGTTCGAGAAAGAAGCTGCTGAGATGAACAAGCGTTCATTCAAGTATGCATGGGTGCTCGACAAGCTCAAGGCCGAGCGTGAGCGTGGTATCACTATTGATATTGCTCTGTGGAAGTTTGAGACCACCAAGTACTACTGCACAGTTATTGATGCTCCTGGACATCGTGACTTCATTAAAAACATGATTACTGGAACTTCCCAGGCTGATTGTGCTGTCCTTATCATTGACTCCACTACCGGAGGTTTTGAAGCTGGTATCTCCAAGGATGGGCAGACCCGTGAGCATGCTTTACTTGCTTTCACCCTTGGTGTCAAACAGATGATCTGTTGCTGCAATAAGATGGATGCGACAACCCCCAAGTACTCAAAGTCTAGGTTCGAAGAAATTGTTAAGGAAGTGTCTTCATATTTAAAGAAGGTGGGATACAACCCTGAAAAGATTGCATTTATCCCCATCTCTGGATTCGAAGGCGACAACATGATTGACAGGTCTACCAACCTTGATTGGTACAAGGGCCCTACCCTTCTTGAAGCCCTTGNACTGATCACTGAGCCCAAGAGACCCTCCGATAAGCCCCTTCGTCTCCCTCTCCAGGATGTTTACAAGATTGGAGGTATTGGAACTGTCCCAGTTGGACGTGTTGAAACTGGTACCCATCAGCCTGGTATGGTTGTGACTTTTGGCCCTACTGGCTTGAACACTGAAGTCAAAT
>HS076943|Panax ginseng||KYERRC001_11-B03-T3.ab1 Panax ginseng in vitro-cultured adventitious root cDNA library Panax ginseng cDNA, mRNA sequence.
GCACGAGGCTCAATTCCCCGATTTAGGGTTTTACCATTCAGTTCCATTAAAAGGTTCTTAATTACTCTCTCTCATTCATATCAGTAAAAATGGCGATTGGTAATCCTGATATTCTAGGTGATCGCCAATCTGGTCAGGATGTTCGCACCCAAAATGTGGTGGCGTGTCAAGCAATTGGAAATATTGTGAAAACGTCACTTGGTCCTGTTGGTCTCGACAAGATGCTTGTTGATGATATTGGTGATGTAACAATAACGAATGATGGTGCTACAATACTCAAGATGTTAGAGGTTGAGCACCCTGCTGCTAAGGTTCTTGTTGAATTGGCCGAGCTTCAAGACAGAGAAGTTGGAGATGGGACAACTTCAGTTGTCATTATAGCTGCAGAATTGCTTAAGAGAGCAAATGATCTGGTGAGAAACAAGATACATCCAACATCTATAATCAGTGGATACAGGCTTGCGATGAGGGAAGCATGTAAATATATCGAGGAAAAATTGGCAGTGAAGGTTGAAAAGCTTGGGAAAGATTCTCTTGTAAACTGTGCCAAGACAAGCATGTCCTCAAAGTTGATATCTGGTGACAGCGACTTCTTTGCAAACTTGGTTGTGGAAGCAGTACAAGCAGTAAAGATGACCAATGCACGTGGTGAAATTAAGTATCCAATAAAGGGAATTAATATACTAAAAGCACATGGAAAAAGCGCTAAAGATAGCTACTTACTAAAAGGTTATGCTCTTAATACTGGCCGAGCTGCGCAAGGGATGCCAATGAGAGTTGCTCCTGCAAGAATTGCCTGTCTTGATTTCACCTTCAAAAGACCAAATGCAGATGGGTGTTTCAGTTTTAGTTACTGATCCTCGAGAGTGGGAAAGATTCGTCAAAGAGAAGCTGATATGACCAAAGAGCGTATTG
>HS079541|Panax ginseng||KYERRC001_39-A08-T3.ab1 Panax ginseng in vitro-cultured adventitious root cDNA library Panax ginseng cDNA, mRNA sequence.
GCACGAGGATTCGGGCATCAAATTAGAAGAAAATGTCAATTACAAGTTCAAATAAACACCCTCAAGTTATTACCTGCAAAGCTGCGGTATCATGGGGAGTTGGAGAGGCAATGGTAATAGAGGAGGTGGAAGTGAGTCCACCCCACTTATCGGAGATACGCATCAAGGTCGTCTCCACCGCCCTCTGCCGCAGTGATTTTAATGCTTGGCTCTCTCAGGCAAACCCTCCTTTATTTCCTCGGATATTTGGCCATGAAGCATCAGGGATTGTTGAGAGTGTTGGAGAAGGAGTAACAGAATTTATAAGGGGGGATCATGTGCTTACATTATTTACTGGAGAATGCATGAGCTGCAGACAGTGTACTTCAAGTAAAAGCAACATGTGCCAAGTACTGGGTTTAGAACGAAAAGGTGTAATGCATAGTGACCAGAAAACACGCTTCTCAGTAAGAGGGAAACCCATTTATCATTATTGTGCAGTTTCAAGTTTCAGTGAGTTTACAGTAGTGCACTCTGGATGTGCTGTCAAAGTCAACTCCATTGCACCTCTGGAGAAAATATGCCTCCTTAGTTGCGGAGTGGCATCAGGTCTGGGTGCAGCTTGGAATGTTGCTGATATTTCTAAAGGATCAACAGTTGTAATTTTTGGTCTGGGAACTGTAGGCCTTTCGGTTGCACAAGGAGCCAAAATAAGGGGAGCATCTCGAATAATAGGTGTGGAACCTAATCCTGAAAAGAGTGAAAAAGCAAAGGCTTTCGGAATAACAGACTTTGTTAATCCAAATGACTATAATGAACCTATTCAACAGGTCATTAAGCGTATTACTGATG
>HS079516|Panax ginseng||KYERRC001_38-G07-T3.ab1 Panax ginseng in vitro-cultured adventitious root cDNA library Panax ginseng cDNA, mRNA sequence.
GCACGAGGAACCTCTCTCTCTCGGAGTCTCGGTGCTAGGGTTTGAGTTTGAAATTGGCTGCGCTGTTACTTGCTTCATTATGGGTAAGGAGAAGTTTCACATCAACATTGTGGTCATTGGCCATGTGGATTCTGGAAAGTCAACAACCACTGGTCATCTCATCTATAAGCTGGGAGGTATTGACAAAAGGGTGATTGAGAGGTTTGAGAAGGAAGCTGCTGAAATGAACAAGCGCTCATTCAAGTATGCCTGGGTTCTTGACAAGCTCAAGGTTGAGCGTGAGCGCGGTATCACCATTGATATTGCTCTGTGGAAGTTTGAGACCACCAAGTACTTCTGCACTGTCATTGATGCCCCTGGACATCGTGATTTCATCAAGAATATGATTACTGGAACTTCCTAGGCAGACTGTGCTGTGCTTATCATTGACTCCACCACTGGAGGTTTTGAAGCTGGTATCTCCAAGGATGGGCAGACCCGTGAACATGCCTTGCTTGCTTTCACACTTGGTGTCAAGCAGATGATCTGTTGCTGCAATAAGATGGATGCCACAACTCCCAAGTACTCCAAGGGTAGGTACGAAGAAATTGTGAAGGAGGTGTCATCCTATTTGAAGAAGGTGGGATACAACCCTGATAAGATAGCCTTTATTCCCATCTCTGGGTTTGAAGGCGACAACATGATTGAGAGGTCTACAAACCTTGACTGGTACAAGGGTCCTACCCTACTTGAAGCCCTTGACCAGATCACTGAGCCCAAGAGGCCCTCAGACAAGCCCCTTCGTCTCCCTCTCCAGGATGTGTACAAGATCGGTGGTATTGGAACCGTGTCAGTGGGACGTGTTGAAACTGGTACCATCAAGCCTGGGATGGTTGTGACTTTTGGCCCATCTGGCTTGACCACTGAAGTCAAATCTGTCGAGATGCACCACGAGGCTCTT
>HS079494|Panax ginseng||KYERRC001_38-E09-T3.ab1 Panax ginseng in vitro-cultured adventitious root cDNA library Panax ginseng cDNA, mRNA sequence.
GCACGAGGTTCCTCTATAACTTTCTCTGGATTATTATTGTTAGTAAGAAAAACCCGTAAGAACCGGTCGCATACTCTTCCCGGTTCTCTCTCTTCCTAAAGATCAATGGCATCGCATATTGTTGGTTACCCACGCATGGGCCCCAAGAGGGAGCTCAAATTTGCTCTTGAATCTTTCTGGGATGGAAAGAGCACAGCTGAGGACTTGCAAAAGGTTGCTGCTGACCTCAGGGCATCCATCTGGAAACAGATGTCTGATGCTGGCATCAAGTACATCCCCAGCAACACTTTCGCATATTATGACCAGGTTCTTGACACAACCGCGATGCTTGGGGCTGTTCCTGCTAGGTACAACTGGAATGGTGGTGAGATTGGATTTGACAATTACTTTTCCATGGCTAGAGGAAATGCCTCTGTCCCTGCTATGGAAATGACCAAGTGGTTTGACACCAACTACCATTACATAGTTCCTGAATTGGGACCTGAGGTGAAGTTCTCTTATGCATCACACAAAGCAGTGACTGAATACAATGAGGCCAAGGCGCTTGGTGTAAATACCGTCCCAGTCCTTGTTGGCCCTGTCAGCTACTTATTGCTATCTAAGCCTGCAAAGG
>HS076889|Panax ginseng||KYERRC001_10-E06-T3.ab1 Panax ginseng in vitro-cultured adventitious root cDNA library Panax ginseng cDNA, mRNA sequence.
GCACGAGGATCGATTAGAATTGGAATTAGGGTTTTTTTTGGGAAAGTTGCAGACAGCTCTCAAAGCTAGGGGTTTTATTGGGTTAGGACCAGAAATGGCGACTGCAAACCCATTTGATTTGCTCGTCGATGATGATAACGATGACCCATCTCAGCTGATTGCTATTCAGCAGCAAAAGATCGTGCCCAAGAAAGCCGCAGCTCCGGCGGCTGCTCAGCTTGCTAAGCAGCCATCCAAGCCGGCCGCTAAGCTGCCCTCAAAGCCTGCACCTCCAGCTCAGGCTGTGAGAGAGGCAAAGAGTGAAGGTTTCCGCGGGGGAGGACGTGGTGGTGGCCGTGGATATGGGCGTGGTGGAGGCCGTGGATTTAATAGAGACTTTTCCAGCAACGATAATTCTTTTAGCAACAGTGGATCTGCTGGTGGTCAAGGTGCAGTTGAGGAAGCTGATTCTGGGAAAACTTCTGAAAGGCGTGGTGGCTATGGTGGACCTCGCGGTGGATTCCGTGGTGGTCGCCGTGGTGGCTATAGTAATGGAGAAGAGGGAGAAGGGGATCGTGTTCGTAGAGTATTTGAACGTCATAGTGGGACGGGGCGTGGAAATGAATACAAACGTGAAGGATCTGGTCGTGGGAATTGGGGAACTCAGACTGATGAACTTTCTCCGGTGACAGAGGAAGTTGTTAATGAAGGTGAGAAAAATTTGGGTACTGAGAAGCCCTCANGAGAGGAAGATGCTACAGATGGAAACAAAGAGAAACCAACAAATGAACCTGAAGAA
>HS076875|Panax ginseng||KYERRC001_10-D04-T3.ab1 Panax ginseng in vitro-cultured adventitious root cDNA library Panax ginseng cDNA, mRNA sequence.
GCACGAGGCGCCTTTTATGACCAGGTTCTTGACACAACCGCGATGCTTGGGGCTGTTCCTGCTAGGTACAACTGGAATGGTGGTGAGATTGGATTTGACAATTACTTTTCCATGGCTAGAGGAAATGCCTCTGTCCCTGCTATGGAAATGACCAAGTGGTTTGACACCAACTACCATTACATAGTTCCTGAATTGGGACCTGAGGTGAAGTTCTCTTATGCATCACACAAAGCAGTGACTGAATACAATGAGGCCAAGGCGCTTGGTGTAAATACCGTCCCAGTCCTTGTTGGCCCTGTCAGCTACTTATTGCTATCTAAGCCTGCAAAGGGTGTTGAGAAAACTTTCAATCTTCTCTCCCTTCTTGACAGCATACTTCCAATCTACAAGGAAGTAATTGCTGAGCTTAAGGCTGCTGGTGCTTCATGGATTCAGTTTGATGAGCCCACTCTTGTGAAGGATCTTGAAGCTCACCAATTGGAAGCATTTACCAAGGCCTACTCCGAACTAGAGTCATCTCTATCTGGTCTTGATGTTCTCATTGAGACCTACTTTGCTGATGTTCCTGCTGAGGCATTCAAAACCCTCACTGCTCTGAAGGGTATTACAGGCTTTGGTTTTGATTTAGTTCGTGGAGAGAAGACTCTTGAATTAATCAAAAGTGGATTCCCTTCCGGTAAATTCCTCTTTGCCGGTGTTGTGGATGGAAGGAACATCTGGGCTAATGATCTTGCGTCATCTCTCACTACCCTCAAGTCCCTCGAGGGAATT
>HS076868|Panax ginseng||KYERRC001_10-C08-T3.ab1 Panax ginseng in vitro-cultured adventitious root cDNA library Panax ginseng cDNA, mRNA sequence.
GCACGAGGCTCCTCTACTTCCTTTGCAGATTACTTGCTCAGTTCCTCTCAAATCACTTCACTCTCCACTCACCATGCCCAAATTACTCCATTCCGGCTTCTCGCTCCTCTCATTTCTCACTTTAATTCTCTTCTCAACTGCCCCATCCCATCAAAATCAACAAATTCAGCAAGATGAAGACACACCCATAACTCGATTCCAACAATACCTCAGAATCAACACAGCCCACCCAACCCCAGATTACACTTCCGCTGTTACCTTCCTCACCAAACTAGCCCAATCAATCCCTAATATCAAAATCCAAACCCTCTCTCTTTCTTCCCCAGATTACAAACCCCTTCTTCTCCTCACTCTGCCAGGCTCCAATCCTTCTCTCTCCTCCGTTCTCTTCAATTCCCACCTCGATTCCGTCCCCGCCGAGCCAGAAAAGTGGATTCACCACCCATTCTCCGCTACCCTCTCGCCGGACGGTAAGATTTTTGCCCGTGGAGCTCAAGATGATAAATGTATTGGTGTCCAGTATTTGGAAAGCATTAGGAACCTTCAGGAGAAATATGGCTTTAAACCCGTTAGGACTATTCATATATCTTATGTTCCTGATGAGGAAATTGGTGGGTTTGATGGGATGATGAAGTTTGTGGAGTCAAAAGAGTTTAAGGAATTGAATGTTGGGTTTGTGCTGGATGAGGGTCAGGCGTCCGTTAATGATGAGTATAGAGTGTTTTATGCGGATAGGGCGCCTTGGAATTTGGTGATTAAGGCAAATGGGAAGCCGGGTCATGGGTCGAAATTGTTCGATAATAGTGCTATGGAGAATTTGATGAAGAGTGTTGAGGTTATGACCAGGTTTAGGGAATACCAGTTTGATTTGGTTAAGGCTG
>HS076866|Panax ginseng||KYERRC001_10-C06-T3.ab1 Panax ginseng in vitro-cultured adventitious root cDNA library Panax ginseng cDNA, mRNA sequence.
GCACGAGGGTCCGTGGTCTGTATCAAGAGAGAGAAAGCTCAGATCTGCTGCTTACACAACCTATACTCCGCCGCTGCTAAATTTCTCTCTCCGCTTTAGAGTATGGAGACCTTCCTATTTACCTCTGAATCTGTTAACGAGGGTCACCCAGACAAGCTTTGTGATCAGATCTCCGATGCTGTGCTTGATGCCTGCCTTGCCCAGGACCCCGACAGCAAGGTCGCCTGTGAGACTTGCACCAAGACCAACATGGTCATGGTCTTTGGGGAGATTACTACCAAGGCCGATGTAGACTACGAAAAGATTGTCCGTGAGACATGCCGTACCATTGGATTTGTTTCTGATGATGTGGGTCTTGATGCCGACAACTGCAAGGTCCTTGTAAACATTGAGCAGCAGAGCCCGGATATTGCCCAGGGTGTCCACGGCCACCTTACAAAGCGCCCAGAGGAGATCGGTGCAGGTGACCAGGGCCATATGTTTGGCTATGCCACTGATGAAACCCCTGAACTTATGCCTCTGAGCCACGTCCTTGCAACCAAACTTGGGGCTCGCCTGACTGAGGTTCGAAAGAACGGTACCTGCGCCTGGCTGAGACCTGATGGTAAGACTCAAGTCACTGTTGAGTATTATAACGAGAATGGTGCGATGGTTCCAATTCGTGTTCATACTGTCCTTATCTCCACCCAACACGATGAGACTGTCACGAATGATGAAATTGCTGCCGACCTCAAGGAGCATGTCATTAAGCCTGTGATCCCCGAGAAGTACCTTGATGAGAACACCATCTTCCACCTTAACCCTTCAGGCCGCTTTGTCATTGGCGGCCCTCATGGTGATGCTGGTCT
>HS076863|Panax ginseng||KYERRC001_10-C03-T3.ab1 Panax ginseng in vitro-cultured adventitious root cDNA library Panax ginseng cDNA, mRNA sequence.
GCACGAGGCGCCGTTGGGCCCTGGATATATTGGAGCGCCGAAGACCATGGGTTGCTAGTCTTTACAAAACTGACAAGTTAGAGCCTCTTGGCGATGCGAGGGAAATACTAAACTTTGCTAGAGCTCAGGCCCGTAAACAGGCTCCAAATCTTAGGCATCCATTAGTTTGTATTGACGTTATTGAAGAGGGTATAGTTTCTGGTCCTCGTGCTGGGCTCTGGAAGGAAGCTGAAGCATTCCAAGGTCTTCTACATTCAGACACTTGCAAGAGTTTGGTCCACATCTTCTTTGCTCAACGTGGTACCACAAAGGTTCCAGGGGTAACTGATCGAGGATTGGTACCAAGACGCATAAATAAGGTTGCTATTCTTGGAGGAGGGTTGATGGGCTCTGGGATAGCAACAACATTGATTCTTAGTAATTATCCTGTGATCTTAAAAGAAGTAAACGATAATTTCTTACAGGCTGGGATAGGTAGAGTCAAAGCCAATTTGCAAAGTCGTGTCAAGAAAGGGAGAATGACTCAAGAGAAGTATGAAAAAACTCTCTCTCTCCTCAAGGGGGCTCTTGACTATGAAAGCTTTAGAGATGTGGACATGGTTATAGAGGCTGTTATAGAGAATGTTTCATTAAAGCAACAAATATTTGCGGATCTTGAAAAATATTGCCCACCACATTGCATTCTTGCAAGTAACACCTCCACAATTGACTTGAACCTAATTGGTGAGAGGACCAAGTCCCATGATCGGATTATTGGAGCTCACTTTTTTAGCCCGGCTCACATTATGCCACTTCTGGGAAATGTTCGTACTGAGAAGACATCCCCTCAAGTAATTGTAGATTTATTAGATGTCGGGAAAA
>HS076852|Panax ginseng||KYERRC001_10-B03-T3.ab1 Panax ginseng in vitro-cultured adventitious root cDNA library Panax ginseng cDNA, mRNA sequence.
GCACGAGGCACACCTAGGAGGAGAAGAATGTCTCACAGGAAGTTTGAGCATCCCAGGCATGGCTCCCTTGGATTTCTCCCAAGGAAGCGCGCTGCTCGCCACCGAGGAAAAGTGAAGGCTTTCCCCAAGGATGACCCAAACAAGCCATGCAAGCTTACTGCATTTTTGGGTTACAAGGCTGGGATGACTCATATTGTAAGGGAGGTTGAAAAGCCTGGATCAAAGCTTCATAAGAAGGAGACCTGTGAGGCAGTGACCATTATTGAGACTCCTCCAATGGTGGTTGTTGGAGTGGTGGCATATGTTAAGACACCACATGGCCTTCGTTCTCTGAACACCGTTTGGGCTCAGCATTTGAGTGAAGACATCAAAAGGAGGTTCTACAAGAACTGGTGCAAGTCAAAGAAGAAAGCTTTTACTAAATACTCAAAGAAGTATGAGACTGATGAAGGGAAGAAAGATATTCAGTCACAGTTGGAGAAGATGAAGAAGTATGCAACAGTTATACGTGTTTTGGCTCACACTCAGATTAGGAAGATGAAAGGCTTGAAGCAGAAGAAGGCACACCTGATGGAGATTCAGGTCAATGGTGGGACTATTGCTCAGAAAGTGGATTTTGCTTATAACTTCTTTGAGAAGCAGGTTCCTATTGATGCTGTTTTCCAGAAGGATGAGATGATTGACATCATCGGTGTGACAAAGGGTAAAGGTTATGAAGGTGTCGTCACTCGTTGGGGTGTCACACGCCTTCCCCGCAAGACTCACAGGGGTCTGCGGAAGGTGGCTTGTATCGGTGCTTGGCATCCAGCACGTGTTTCATTCACTGT
>HS076848|Panax ginseng||KYERRC001_10-A11-T3.ab1 Panax ginseng in vitro-cultured adventitious root cDNA library Panax ginseng cDNA, mRNA sequence.
GCACGAGGCGCAATATTAGTTCAATTGCAGTACTGCAGTAGTTCAATTCCCGTTCGTCACTTATTTCACAAATTAGGGTTATTTCGACTGATCATTTTGTGTTTTTTGTTTTGTGTTATATATTAGGCGACAATGATCTGGATCGATAAGATTCCTCGCTATTTCAAGTTGTTTTTACACTGGATAAATTTGTTGGGTTTGTTGATTTAATCGGAATGATTTGATGGTTATTTATGGTTTAGATTGGTTTGGCTTCAGGAATTCAATAAGTGATCTGAAAAAGATGGCTAAGGAAGTGGCTAATGGATCTACAAAATCCCCTCTAACTCCTTCTCCGCTGCATACTGCCAAATTTTTTCAGGCTGAGCTGAATTGGGATATTAGTTTCAATGCCCACCATGCGATTGATCAGGGTCGTCAATGGGAGGCATTCCACTGTCACTAAAAAGAATAGAGAATGGCAAGAGAAATTACCTATACAGTATTCAAAGTTGAAGAAATCATGTACTCTAAAGCCAATTCCAAGGTTGAATACATGGATCTTGAAACACTGTGGGACAGGGCTAATAAGGCCATTAATATCACAATTCGGAGAGACAAGAGTACAGAATCCAAAGAACTGTTGTCGCCATGTGTTGAAGATATCATGCTCTATGATGTAGCTGTCGAGGCCGACCCTGACTTGATTAGTTATAAACGTACTTGGCATCCAGTTTTCGTTGATACGAATGCTCCATCCCAAAGTTTAACAGCACAACTACCACATTGTCAAGGGCATATCTATCGATAGTGGACAATTGTTAAATCTTAGTTCAAGTTGTTTA
>HS076832|Panax ginseng||KYERRC001_09-H05-T3.ab1 Panax ginseng in vitro-cultured adventitious root cDNA library Panax ginseng cDNA, mRNA sequence.
GCACGAGGCTCTCTTTGGATTATTATTGTTAGTAAGAAAAACAAGTAAGAACCGGTCGCATACTCTTCCCGGTTCTCTCTCTTCCTAAAGATCAATGGCATCTCATATTGTTGGTTACCCACGCATGGGCCCCAAGAGGGAGCTCAAATTTGCTCTTGAATCTTTCTGGGATGGAAAGAGCACAGCTGAGGACTTGCAAAAGGTTGCTGCTGACCTCAGGGCATCCATCTGGAAACAGATGTCTGATGCTGGCATCAAGTACATCCCCAGCAACACTTTCGCATATTATGACCAGGTTCTTGACACAACCGCGATGCTTGGGGCTGTTCCTGCTAGGTACAACTGGAATGGTGGTGAGATTGGATTTGACAATTACTTTTCCATGGCTAGAGGAAATGCCTCTGTCCCTGCTATGGAAATGACCAAGTGGTTTGACACCAACTACCATTACATAGTTCCTGAATTGGGACCTGAGGTGAAGTTCTCTTATGCATCACACAAAGCAGTGACTGAATACAATGAGGCCAAGGCGCTTGGTGTAAATACCGTCCCAGTCCTTGTTGGCCCTGTCAGCTACTTATTGCTATCTAAGCCTGCAAAGGGTGTTGAGAAAACTTTCAATCTTCTCTCCCTTCTTGACAGCATACTTCCAATCTACAAGGAAGTAATTGCTGAGCTTAAGGCTGCTGGTGCTTCATGGATTCAGTTTGATGAGCCCACTCTTGTGAAGGATCTTGAAGCTCACCAATTGGAAGCATTTACCAAGGCCTACTCCGAACTAGAGTCATCTCTATCTGGTCTTGATGTTCTCATTGAGACCTACTTTGCTGATGTTCCTGCTG
>HS076828|Panax ginseng||KYERRC001_09-H01-T3.ab1 Panax ginseng in vitro-cultured adventitious root cDNA library Panax ginseng cDNA, mRNA sequence.
GCACGAGGCACCGTTTCACAGTTTGTTGTGGGCTGTTGAATTCAGTATGTTCCACAAATTTCGGGTAAGTTGAGGGATAGGAGTTGGCAGTCTTTTTGGACATAAAAAGGAGGTGAATATTTGTTAGAGGAAAACAACGACCATGTATAGGCCTCTGCCAACTACTACTATTCGTGGTGGATTAGCTACAGATAGTGGAGATTTTGTGGTGACACTAGATCAAGTTCCTTGCTGGAGTGATGCAGAGTTTAGGTTATCATATGAAATTGAGGATTCTGGTTATCCAAATTCATATTTCCCAGACCCTTTAACTGCTTCGTCTGGAGTGGAGAGTGGTGGAAATGGGACTTCAAGGTTTCCTGTTGATCATGAAATTAACTCGAAGATATATCTATGGAGAGGGAATCCTTGGAATCTTGAGGTAGACGTTGTTGTTAACTCTACAAATGAGAATTTGGATGAAGTACACAGCAGCCCTGGCTTGCATGCCGCAGCTGGACCTGGTCTTGCTGAAGAATGTGCAACACTGGGTGGCTGTCGCACGGGTATGGCAAAAGTTACTAATGCATATGACCTTCCCGCTAGGAGGGTTATTCATACTGTTGGTCCTAAGTATGCCGTGAAATATCATACTGCTGCAGAGAATGCTCTTAGTCACTGTTATAGGTCTTGCCTTGAACTTCTCATTGAAAATGGGCTTCAAAGTATTGCGATGGGCTGTATATACACAGAAGCCAAAAACTATCCACGTGAACCAGCCGCTCATGT
>HS079405|Panax ginseng||KYERRC001_37-F04-T3.ab1 Panax ginseng in vitro-cultured adventitious root cDNA library Panax ginseng cDNA, mRNA sequence.
GCACGAGGCTCCATTTAACTCCATCGGCGCCATTCGGCGGTGATTGTGAAAAGCTCATCACTTCTAGCTGATAGACGACATCCGTTCACCCCAAACCCTAACCCTATCCAATATCTTCAATTAAAACCTGCTGTTCAAATCGCCGTTAATTAATCTAGCAATCGGTCAAAATGGTGTTAGCCCAATTAGGGGGGAGCATCTCGCGTGCTCTCCAGCAGATGAGCAATGCGACGATCATTGACGAGAAGGTTTTGAATGAATGTCTTAATGAAATCACTAGAGCTCTTCTTCAGTCCGATGTTCAGTTCAAGCTTGTTCGTGATATGCAAACCAATATTAAGAAAATTGTTAATCTCGACGATCTCGCTGCTGGCCACAACAAGCGTAAAATCATCCAACAGGCTATTTTTAATGAGCTCTGTAAGATGTTGGATCCTGGGAAGCCTTCTTTCGCACCAAAGAAAGGGAAACCAAGTGTTGTCATGTTTGTAGGTTTGCAAGGTTCTGGGAAAACCACTACGTGTACAAAATATGCATATTACCACCAGAAGAAGGGCTGGAAACCAGCTTTAGTGTGTGCCGACACATTCAGAGCTGGTGCTTTTGATCAGCTAAAGCAGAATGCTACTAAAGCTAAAATTCCTTTCTATGGGAGCTACTCGGACTCGGATCCTGTGAAAATTGCAGTGGAAGGTGTTGATTTATTCAAGAAGGAAAATTGTGATCTTATAATTGTCGACACTAGTGGCCGCCACAAACAGGAAGCAGCTCTGTTTGAAGAGATGCGCCAAGTTTCTGAAGCAACGAGACCAGATCTTGTTATTTTTGTTATGGATAGCAGTATTGGTCAAGCTGCATTTGATCAAG
>HS079392|Panax ginseng||KYERRC001_37-E02-T3.ab1 Panax ginseng in vitro-cultured adventitious root cDNA library Panax ginseng cDNA, mRNA sequence.
GCACGAGGGCCCCTTTCTCGGTGCTAGGGTTTTGAGTTTGAAATTCGTTGCGCTGCTACTTGCTTCATTATGGGTAAGGAGAAGGTTCACATCAACATTGTGGTCATTGGCCATGTGGATTCTGGAAAGTCAACCACCACTGGTCATCTCATCTATAAGCTGGGAGGTATTGACAAAAGGGTGATTGAGAGGTTTGAGAAGGAAGCTGCTGAAATGAACAAGCGTTCATTCAAGTATGCCTGGGTTCTTGACAAGCTCAAGGCTGAGCGTGAGCGCGGTATCACCATTGATATTGCTCTGTGGAAGTTTGAGACCACCAAGTACTACTGCACTGTCATTGATGCCCCTGGACATCGTGATTTCATCAAGAATATGATTACTGGAACTTCCCAGGCAGACTGTGCTGTGCTTATCATTGACTCCACCACTGGAGGTTTTGAAGCTGGTATCTCAAAGGATGGGCAGACCCGTGAACATGCCTTGCTTGCTTTCACACTTGGTGTCAAGCAGATGATCTGTTGCTGCAATAAGATGGATACCACAACTCCCAAGTACTCCAAGGGTAGGTACGAAGAAATTGTGAAGGAGGTGTCATCCTATTTGAAGAAGGTGGGATACAACCCTGATAAGATTGCCTTTATTCCCATCTCTGGGTTTGAAGGCGATAACATGATTGAGAGGTCTACAAACCTTGACTGGTACAAGGGTCCTACCCTACTTGAAGCCCTTGACCAGATCACTGAGCCCAAGAGGCCCTCAGACAAGCCCCTTCGTCTCCCTCTCCAGGATGTGTACAAGATCGGTGGTATTGGAACCGTGCCAGTGGGACGTGTTGAAACTGGTACCATCAAGCCTGGGATGGTTGTGACTTTCGGCCCATCTGGCTTGACCACTGAAGTCAAATCTGT
>HS079320|Panax ginseng||KYERRC001_36-G02-T3.ab1 Panax ginseng in vitro-cultured adventitious root cDNA library Panax ginseng cDNA, mRNA sequence.
GCACGAGGTCCCTATAAACGTTGTGGTTATAGGCCATGTCGACTCTGGAAACTCTACCACCACAGGTCACTTGATCTACAAGCTTGGTGGTATTGACAAGCGTGTTATTGAAAGGTTTGAGAAGGAGGCTGCTGAAATGAACAAGAGGTCGTTCAAGTATGCCTGGGTGCTTGACAAGCTCAAGGCTGAGCGTGAACGTGGTATTACCATTGATATTGCCTTGTGGAAGTTTGAAACCACCAGGTACTACTGCACGGTCATTGATGCCCCTGGACATCGTGACTTTATCAAGAACATGATTACTGGTACCTCACAGGCTGACTGTGCCGTCCTCATCATTGACTCCACCACTGGTGGTTTTGAAGCTGGTATCTCTAAAGATGGTCAGACCCGTGAGCATGCTTTGCTTGCTTTCACCCTTGGTGTCAAACAAATGATTTGCTGTTGTAACAAGATGGATGCTACCACCCCAAAATACTCTAAAGCAAGGTACGAAGAAATTGTGAAGGAAGTTTCTTCATACTTGAAGAAGGTTGGATACAACCCAGATAAAATTGCTTTTGTCCCCATCTCCGGATTCGAGGGAGACAACATGATTGAGAGGTCCACAAACCTTGACTGGTACAAGGGCCCAACACTCCTCGAGGCCCTTGACTTGATTAATGAACCCAAGAGGCCCTCTGACAAGCCCCTCCGTCTCCCACTTCAGGATGTGTACAAGATTGGTGGTATTGGAACTGTGCCAGTGGGAAGAGTTGAGACTGGTACTCTCAAGCCAGGAATGGTCGTTA
>HS079277|Panax ginseng||KYERRC001_36-C06-T3.ab1 Panax ginseng in vitro-cultured adventitious root cDNA library Panax ginseng cDNA, mRNA sequence.
GCACGAGGGCCTTCTCTTCCCGGTTCTCTCTCTTCCTAAAGATCAATGGCATCTCTTATTGTTGGTTACCCACGCATGGGCCCCAAGAGGGAGCTCAAGTTTGCTCTTGAATCTTTCTGGGATGGAAAGAGCACAGCTGAGGACTTGCAAAAGGTTGCTGTTGACCTCAGGGCATCCATCTGGAAACAGATGTCTGATGCTGGCATCAAGTACATCCCCAGCAACACTTTCGCATATTATGACCAGGTTCTTGACACAACCGCGATGCTTGGGGCTGTTCCCGCTAGGTACAACTGGAATGGTGGTGAGATTGGATTTGACAATTACTTTTCCATGGCTAGAGGAAATGCCTCTGTCCCTGCTATGGAAATGACCAAGTGGTTTGACACCAACTACCATTACATAGTTCCTGAATTGGGACCTGAGGTGAAGTTCTCTTATGCATCACACAAAGCAGTGACTGAATACAATGAGGCCAAAGCGCTTGGTGTAAATACCGTCCCAGTCCTTGTTGGCCCTGTCAGCTACTTATTGCTATCTAAGCCTGCAAAGGGTGTTGAGAAAACTTTCAATCTTCTCTCCCTTCTTGACAGCATACTTCCAATCTACAAGGAAGTAGTTGCTGAGCTTAAGGCTGCTGGTGCTTCATGGATT
>HS079255|Panax ginseng||KYERRC001_36-A07-T3.ab1 Panax ginseng in vitro-cultured adventitious root cDNA library Panax ginseng cDNA, mRNA sequence.
GCACGAGGCCCCTTATCAGTAAGAACTACTATTCTCCGCTTCTTCCTCTTCCTCTAGAACAATGGCATCCCATATTGTTGGTTACCCACGCATGGGCCCAAAAAGAGAGCTCAAATTTGCTCTTGAATCTTTCTGGGATGGGAAGAGCAGTGCTGAGGACTTGCAAAAGGTGGCTTCTGATCTCAGGTCATCCATCTGGAAGCAGATGAATGATGCTGGCATCAAGTACATTCCCAGCAACACATTCTCATACTATGACCAAGTTCTTGATACAACTGCAACGCTCGGGGCTGTTCCTGCTAGGTACAACTGGAATGGTGGTGAGATTGGATTTGACACTTACTTCTCCATGGCTAGAGGAAATGCCTCTGTTCCTGCTATGGAAATGACCAAGTGGTTTGACACCAACTACCATTACATAGTTCCTGAATTGGGACCTGAGGTGAAGTTTTCTTATGCATCACACAAAGCCGTGACTGAATACAAGGAGGCTAAGGCGCTTGGTGTAGATACCGTCCCCGTCCTCGTTGGCCCTGTCAGCTACTTGTTGCTATCTAAGCCTGCAAAGGGTGTTGAGAAAACATTCAATCTTCTCTCCCTTCTTGACAGCATCCTTCCAATTTACAAGGAAGTAGTGGCCGAGTTGAAGGCTGCTGGTGCTTCATGGATTCAGTTTGACGAACCCACACTTGTGAAGGATCTTGAAGCACACCAATTGGAAGCATTCACTGAGGCCTACTCTGAGCTAGAGTCATCTCTATCCGGCCTTAATGTTCTCATTGAGACATACTTTGCTGATGTTCCTGCTGAGGCATTCAAAACCCTCACTGCTCTAAAGGGTGTTACAGCCTTTG
>HS079220|Panax ginseng||KYERRC001_35-F07-T3.ab1 Panax ginseng in vitro-cultured adventitious root cDNA library Panax ginseng cDNA, mRNA sequence.
GCACGAGGCCCCTTTCTCGGTGCTAGGGTTTTGAGTTTGAAATTCGTTGCGCTGCTACTTGCTTCATTATGGGTAAGGAGAAGGTTCACATCAACATTGTGGTCATTGGCCATGTGGATTCTGGAAAGTCAACCACCACTGGTCATCTCATCTATAAGCTGGGAGGTATTGACAAAAGGGTGATTGAGAGGTTTGAGAAGGAAGCTGCTGAAATGAACAAGCGTTCATTCAAGTATGCCTGGGTTCTTGACAAGCTCAAGGCTGAGCGTGAGCGCGGTATCACCATTGATATTGCTCTGTGGAAGTTTGAGACCACCAAGTACTACTGCACTGTCATTGATGCCCCTGGACATCGTGATTTCATCAAGAATATGATTACTGGAACTTCCCAGGCAGACTGTGCTGTGCTTATCATTGACTCCACCACTGGAGGTTTTGAAGCTGGTATCTCAAAGGATGGGCAGACCCGTGAACATGCCTTGCTTGCTTTCACACTTGGTGTCAAGCAGATGATCTGTTGCTGCAATAAGATGGATACCACAACTCCCAAGTACTCCAAGGGTAGGTACGAAGAAATTGTGAAGGAGGTGTCATCCTATTTGAAGAAGGTGGGATACAACCCTGATAAGATTGCCTTTATTCCCATCTCTGGGTTTGAAGGCGATAACATGATTGAGAGGTCTACAAACCTTGACTGGTACAAGGGTCCTACCCTACTTGAAGCCCT
>HS079055|Panax ginseng||KYERRC001_33-H06-T3.ab1 Panax ginseng in vitro-cultured adventitious root cDNA library Panax ginseng cDNA, mRNA sequence.
GCACGAGGACTCCATGGCTGTGGTATCTGCGAATCCCGATAGGATCGAACCCTCGCAACCGATGGACCAATCGCCGTCCAAACGAGCCGCTCCGTTGCCCTCCGGCAAACCTTCATCGGCCGCCTGTTCACCGGATCAATCCCCTCCGGATCAGGCGTCTTCTTCCCCGAATTCCTCCGCACAACTCCAGGTTCAGCCGCAGCCCTCGTTGAGGAGTGAAGAGTATCGGCAATTGTTTCGGCTTCCTCCTGAGGAAGTACTAATTCAAGATTTTAATTGTGCTTTGCAAGAGAATTTTATTCTTCAGGGGCATATGTACCTGTTTGTCCATTATATATGCTTTTATTCCAACCTATTTGGATTTGAGACAAAGAAAATAGTTCCTTTTCAAGAAGTCACATCTGTACGAAGAGCCAAGACAGCAGGAATCTTCCCTACTGCTATAGAAATTACAGCTGCAGGAAAGAAGTACTTCTTTACATCTTTTCTGTCCCGTGATGAAGCTCTTAAGCTCATTGATGATGGTTTGTTGCAACATGGTAATGGGTCTAAATTGATCACAGATCAGCAGGATTCAACTTCTGAGTTAAGTAGTCAAGAGAGTGAAATTGTCACTGTTGAACAGTCGGAACGTTCCAATCAGACAGTGGATGACTTGGATTCAACAGAAAGGAATAAGGATGTTTGTGTGCCAGAGGATTATGAGCCCCCACCTAATGGTGAAGCTGAAATTGTATNCACATCTTCTACAATGCAAAATAAACTGAAAGACGATGCAGAAGTTATTATAAATAATGATTGTTCATCTTCTGGAAAACATATAGTGTGGGAGCCGGAGGATTCTGATGCGCCCAAGGTCCAGAATATATACTCTGGTAGCAAATCAAAGTTTCCGATAAAGGTGGATGAATTCTTAGTCTCTTCTTTTC
>HS079001|Panax ginseng||KYERRC001_33-C10-T3.ab1 Panax ginseng in vitro-cultured adventitious root cDNA library Panax ginseng cDNA, mRNA sequence.
GCACGAGGGACTGTTGGCAAGAATGTGGTCCCTGAAGTGTGGCAAGTGTTGGACAAGATTCGGGAGTTCTCCGAGAAAGTCCGCAGTGGTTCTTGGGTTGGAGCTACAGGAAAAGCATTGAAAGATGTTATTGCAAATGGTATTGGTGGCAGCTTCTTAGGTCCTCTCTTTGTGCATACCGCTCTTCAAACAGATCCAGAGGCTATTGAATATGCAGCAGGACGACAGTTGCGTTTTCTAGCAAATGTTGATCCAATAGATGTCGCCAGAAATATCACAGGCTTGAACCCTGAAACTACACTAGTTGTTGTGGTTTCAAAAACCTTTACAACCGCTGAAACTATGCTGAATGCTCGGACACTGAGGGAATGGATCTCATCCGCGTTGGGGGCTCAAGCGGTTGCAAAGCATATGGTTGCTGTCAGTACTAATCTTACGCTTGTGGAAAAGTTTGGCATTGATCCTAAAAATGCTTTTGCATTTTGGGACTGGGTGGGAGGCCGATATAGTGTTTGCAGCGCTGTAGGTGTGCTGCCTTTATCACTCCAATATGGTTTTCCTGTTATTGAGAAATTCCTGAAGGGAGCTTCAAGCATTGATCAACACTTTTACTCAACGCCCTTTGAGAAAAACATACCTGTACTTTTGGGTTTGTTTAGCGTATGGAATGTTTCATTTCTTGGGTATCCTGCAAGAGCCATTTTACCTTACTCTCAAGCCTTGGAGAAATTTGCCCCGCATATTCAACAGGTTAGTATGGAGAGTAATGGGAAAGGGGTCACGATTTGA
>HS078977|Panax ginseng||KYERRC001_33-A10-T3.ab1 Panax ginseng in vitro-cultured adventitious root cDNA library Panax ginseng cDNA, mRNA sequence.
GCACGAGGCTCTCTTAGATTTTATCAGATCTCTCCCTATTTTCTCTCTTTCCTATTTGTTGAAAGGAAGAGAAATTATCCCGATTATAATTCATAAGAATAAGAAAAAATGTCAACGTCGGCGAGGAAAAGACTGATGAGGGATTTCAAGAGGTTGCAGCAAGATCCTCCGGCCGGTATCAGTGGTGCTCCTCAAGACATTAACATCATGTTGTGGAATGCTGTCATTTTTGGGCCTGATGATACTCCTTGGGATGGAGGTACGTTTAAGCTGACTCTGCAATTCTCAGAGGATTACCCAAATAAACCACCAGTAGTACGATTCGTCTCAAGGATGTTTCATCCCAACATTTATGCAGATGGAAGTATATGCTTGGATATTTTACAGAATCAGTGGAGTCCTATATATGATGTTGCAGCTATACTTACCTCTATCCAGTCATTGCTTTGTGATCCAAACCCAAACTCCCCTGCAAATTCTGAAGCAGCTCGTATGTTCAGTGAAAATAAGCGCGATTACAACCGAAGAGTGCGTGAAGTAGTTGAGCAGAGCTGGACAGCTGACTAAATCTCAAAATGAGTGCAACCCTTGTCTATGGTTGAACCGATAATAGGCAGAAGGGTGGTGGTGTTGGTACTAGTGTTCATGTACTTGATAATTCTATGTTATGTTTTCGTGTGCCTTTAAACAGAATCTGCTTCCAGGCAGCTAAGTTTGTAGCTGTCCCAGTTACCTGACGATTCCTTTTTTCTTCTTCCATTAGATCCTCCGATTTATCCTCTAGAAGTATGCGTGTTTGTTGTATTTTGTGTATAGTTCTGAGGACTTGGATTTTAT
>HS078958|Panax ginseng||KYERRC001_32-H02-T3.ab1 Panax ginseng in vitro-cultured adventitious root cDNA library Panax ginseng cDNA, mRNA sequence.
GCACGAGGCTCCTTTCACTACTCTCCGGATCAGTAAGAACTACTATTCTCCGCCTCTTCCTCTTCCTAAAGAACAATGGCATCCCATATTGTTGGTTACCCACGCATGGGCCCAAAAAGAGAGCTCAAACTTGCTCTTGAATCTTTCTGGGATGGGAAGAGCAGTGCTGAGGACTTGCAAAAGGTGGCTTCTGATCTCAGGTCATCCATCTGGAAGCAGATGAATGATGCTGGCATCAAGTACATTCCCAGCAACACATTCTCATACTATGACCAAGTTCTTGATACAACTGCAACGCTCGGGGCTGTTCCTGCTAGGTACAACTGGAATGGTGGTGAGATTGGATTTGACACTTACTTCTCCATGGCTAGAGGAAATGCCTCTGTTCCTGCTATGGAAATGACCAAGTGGTTTGACACCAACTACCATTACATAGTTCCTGAATTGGGACCTGAGGTGAAGTTTTCTTATGCATCACACAAAGCCGTGACTGAATACAAGGAGGCTAAGGCGCTTGGTGTAGATACCGTCCCCGTCCTCGTTGGCCCTGTCAGCTACTTGTTGCTATCTAAGCCTGCAAAGGGTGTTGAGAAAACATTCAATCTTCTCTCCCTTCTTGACAGCATCCTTCCAATTTACAAGTAAGTAGTGGCCGAGTTGAAGGCTGCTGGTGCTTCATGGATTCAGTTTGA
>HS078907|Panax ginseng||KYERRC001_32-C11-T3.ab1 Panax ginseng in vitro-cultured adventitious root cDNA library Panax ginseng cDNA, mRNA sequence.
GCACGAGGTCCCCTTTCTCTAGGTCGGCGAGCGAGAGAAACTATCTACAGTTTCTCGTTTGATAAGCTTTTCGGTTGAACTATGGGTAAGGAAAAGTTTCACATTAACATTGTGGTTATAGGCCATGTCGACTCTGGAAAGTCTACCACCACAGGTCACTTGATCTACAAGCTTGGTGGTATTGACAAGCGTGTTATTGAAAGGTTTGAGAAGGAGGCTGCTGAAATGAACAAGAGGTCGTTCAAGTATGCCTGGGTGCTTGACAAGCTCAAGGCTGAGCGTGAACGTGGTATTACCATTGATATTGCCTTGTGGAAGTTTGAAACCACCAGGTACTACTGCACGGTCATTGATGCCCCTGGACATCGTGACTTTATCAAGAACATGATTACTGGTACCTCACAGGCTGACTGTGCCGTCCTCATCATTGACTCCACCACTGGTGGTTTTGAAGCTGGTATCTCTAAAGATGGTCAGACCCGTGAGCATGCTTTGCTTGCTTTCACCCTTGGTGTCAAACAAATGATTTGCTGTTGTAACAAGATGGATGCTACCACCCCAAAATACTCTAAAGCAAGGTACGAAGAAATTGTGAAGGAAGTTTCTTCATACTTGAAGAAGGTTGGATACAACCCAGATAAAATTGCTTTTGTCCCCATCTCCGGATTCGAGGGAGACAACATGATTGAGAGGTCCACAAACCTTGACTGGTACAAGGGCCCAACACTCCTCGAGGCCCTTGACTTGA
>HS078889|Panax ginseng||KYERRC001_32-B05-T3.ab1 Panax ginseng in vitro-cultured adventitious root cDNA library Panax ginseng cDNA, mRNA sequence.
GCACGAGGCGCTCTTCGGAGGTCTGTATCAAGAGGGGGAAAGTTCAGATCTGCTGTTTACACAACCTATACTCCGCCGCTGCTAAATTTCTCTCTCCGCTTTAGAGTATGGAGACCTTCCTATTTACCTCTGAATCTGTTAACGAGGGTCACCCAGACAAGCTTTGTGATCAGATCTCCGATGCGGTGCTTGATGCCTGCCTAGCCCAGGACCCCGACAGCAAGGTTGCCTGTGAGACTTGCACCAAGACCAACATGGTCATGGTCTTTGGGGAGATTACTACCAAGGCCGATGTAGACTACGAAAAGATTGTCCGTGAGACATGCCGTACCATTGGATTTGTTTCTGATGATGTGGGTCTTGACGCTGACAACTGCAAGGTCCTTGTAAACATTGAGCAGCAGAGCCCTGATATTGCCCAGGGTGTCCACGGCCACCTTACAAAGCGCCCAGAGGAGATCGGTGCAGGTGACCAGGGCCATATGTTTGGCTATGCCACTGATGAAACCCCTGAACTTATGCCTCTGAGCCATGTCCTTGCAACCAAACTTGGGGCTCGCCTGACTGAGGTTCGAAAGAACGGTACCTGCGCCTGGCTGAGACCTGATGGTAAGACTCAAGTCACTGTTGAGTATTATAACGAGAATGGTGCGATGGTTCCAATTCGTGTTCATACTGTCCTTATCTCCACCCAACACGATGAGACTGTCACCAATGATGAAATTGCTGCCGACCTCAAGGAGCATGTCATTAAGCCTGTGATCCCCGAGAAGTACCTTGATGAGAAGACCATCTTCCACCTTAACCCTTCAGGCCGCTTTGTTATTGGCGGCCCTCA
>HS078868|Panax ginseng||KYERRC001_31-H08-T3.ab1 Panax ginseng in vitro-cultured adventitious root cDNA library Panax ginseng cDNA, mRNA sequence.
GCACGAGGATCACATCCAGGAGGAGAAGAATGTCTCACAGGAAGTTTGAGCATCCCAGGCATGGCTCCCTTGGATTTCTCCCAAGGAAGCGCGCTGCTCGCCACCGAGGAAAAGTGAAGGCTTTCCCCAAGGATGACCCAAACAAGCCATGCAAGCTTACTGCATTTTTGGGTTACAAGGCTGGGATGACTCATATTGTAAGGGAGGTTGAAAAGCCTGGATCAAAGCTTCATAAGAAGGAGACCTGTGAGGCAGTGACCATTATTGAGACTCCTCCAATGGTGGTTGTTGGAGTGGTGGCATATGTTAAGACACCACATGGCCTTCGTTCTCTGAACACCGTTTGGGCTCAGCATTTGAGTGAAGACATCAAAAGGAGGTTCTACAAGAACTGGTGCAAGTCAAAGAAGAAAGCTTTTACTAAATACTCAAAGAAGTATGAGACTGATGAAGGGAAGAAAGATATTCAGTCACAGTTGGAGAAGATGAAGAAGTATGCAACAGTTATACGTGTTTTGGCTCACACTCAGGTAATTAGGCGCTGCAGTTCATATTTGCTATGATTTTCCTGATTTTGATTTCTTAAATATGTTGCAGTTGTGCATTCTGATGTAGACAATGCTGCAATTCCATTCTATATATAATCTTATCTTGCTGGTCACTCAAGGTTACTATTATATTGGCACTCATGGCAATGAATTTTATTTTCATGTTCGTTCTATATCGTACATGTTATGGCATTATAAATATATTAGGGTAAATGACACTAATGCATTGTTTCTGAAGTTTCCT
>HS078866|Panax ginseng||KYERRC001_31-H06-T3.ab1 Panax ginseng in vitro-cultured adventitious root cDNA library Panax ginseng cDNA, mRNA sequence.
GCACGAGGGTCATTTAGAAAAACAAGTAAGAACCGGTCGCATACTCTTCCCGGTTCTCTCTCTTCCTAAAGATCAATGGCATCTCATATTGTTGGTTACCCACGCATGGGCCCCAAGAGGGAGCTCAAATTTGCTCTTGAATCTTTCTGGGATGGAAAGAGCACAGCTGAGGACTTGCAAAAGGTTGCTGCTGACCTCAGGGCATCCATCTGGAAACAGATGTCTGATGCTGGCATCAAGTACATCCCCAGCAACACTTTCGCATATTATGACCAGGTTCTTGACACAACCGCGATGCTTGGGGCTGTTCCTGCTAGGTACAACTGGAATGGTGGTGAGATTGGATTTGACAATTACTTTTCCATGGCTAGAGGAAATGCCTCTGTCCCTGCTATGGAAATGACCAAGTGGTTTGACACCAACTACCATTACATAGTTCCTGAATTGGGACCTGAGGTGAAGTTCTCTTATGCATCACACAAAGCAGTGACTGAATACAATGAGGCCAAGGCGCTTGGTGTAAATACCGTCCCAGTCCTTGTTGGCCCTGTCAGCTACTTATTGCTATCTAAGCCTGCAAAGGGTGTTGAGAAAACTTTCAATCTTCTCTCCCTTCTTGACAGCATACTTCCAATCTACAAGGAAGTAATTGCTGAGCTTAANGCTGCTGGTGCTTCATGGATTCAGTTTGATGAGCCCACTCTTGTGAAGGATCTTGAAGCTCACAAATTGGAAGCATTTACCAAGGCCTACTCCGAACTAGAGTCATCTCTATCTG
>HS078862|Panax ginseng||KYERRC001_31-H02-T3.ab1 Panax ginseng in vitro-cultured adventitious root cDNA library Panax ginseng cDNA, mRNA sequence.
GCACGAGGAACCTTTTCTGCCTATACTTTCCCCTGTAGATGATGATGGAAATTTCTCTGAAGAAGCAGGGAAGTTTAGTGGGTTAGATGTACTTGGGGATGGTAATGCTGCTGTTATTGAATACTTGGATAAACACTTATCAATTATCATGGTAGAGCCATACAAGCACAAATATCCATATGATTGGCGAACCAAAAAACCTACAATATTTAGGGCAACTGAACAATGGTTTGCGTCTGTAGAAGGATTTCGGAAAGCTGCTATGGATGCAATTAGCCAAGTAACATGGACTCCATCTCAGGCAGAGAACAGAATCTCTGCGATGGCTTCTAGCCGCTCCGATTGGTGTATATCACGGCAAAGGACCTGGGGTGTCCCCATTCCAGTCTTCTATCATGTGGACACAAAGGAACCTCTAATGAATGTAGAGACTATTAGTCACATCAAGTCTATAATTTCCCAAAAGGGTAGTGATGCATGGTGGTACATGACGGTGGAAGAATTGCTTCCTGATAGATATCGTGAAAAAGCATCAGAGTATGAAAAAGGGACTGATACAATGGATGTTTGGTTTGACTCAGGCTCTTCTTGGGCTGCTGTTTTGGAGAAAAGAAATGGCCTTAGCTTTCCTGCAGATTTGTATCTCGAAGGTACAGATCAACATCGCGGGTGGTTCCAGAGTTCGTTGTTAACATGCGTTGCTACAAA
>HS078822|Panax ginseng||KYERRC001_31-D09-T3.ab1 Panax ginseng in vitro-cultured adventitious root cDNA library Panax ginseng cDNA, mRNA sequence.
GCACGAGGCTCCTCTCTCTCTGTTTAGCCTCTTTTTGTTCCATCTGGAAAACAAAATCTAGGTTTTGCATAGATTTCCTGTAACTCTCAAATCTCTAGATCCATGGCAAAGACAAGCAGAGGGCACACCTTTAACACCGATCGACAGTCGGTTCAACGAAGCACAGAGTCAACCTTAGCACCTAGAGAAGCTCGACGATTGAACCTGAACCTCTCTAAGCTTGCATTTGATTTGGGGTGCTTCTTCGAAGGAGATGAAGCGAAAAGGACAGACATCTAAGGGTAAAAGGAAAACCCTTTTCACAGTGAGTCTTGCTCGATCGGTATAAAATAGGTATGTGCTTAAGAAGATTCATGGTGTATATGCGTTAATTCAGTTTGTTACAGTTCGTGTGGTCGATGTGTTTGCGATGCCACAGAGTGGTACTGGTGTTAGTGTTGAAGCTGTCGATCATGTTTTTCAGACTAATATGATGGATATGCTGAAGCAAATGGGGAGAGGATGGATGATACTGTAGGGTGGCAATGAACTTCCAGGTCTGGTGCATCTGACCATGTCAAACATCCTGTCTATGTGCCAGAGTACAGGGAGTGTGGCTGAGATGTCATACTATGAGGTTTACATGGATAAATGTTATGATTTGTTGGAACCCAAAACAAAGGAAATCGCGGTGCTGGCTGACAAAGATGGGCAGATTCATCTCAAGGGACTGGCTTGGGGGGAAGAAGCCGTGCTTTGATGGTAGCTTGTCTGGTGAATAAGTTGATGCTCTTGGAGGAAAGTATATCCGTAGATTAACTGCAGTGCTTATTCATCATGTACCAGTCTTTTGGAAAGTATCCCTTTCGGTTTCTAGCAGAAAATTTGCAAAGTGAGAAAGATTATATTTCTACTGGTTGGGGTTAGGCCTTTAGGTGCACTGTGCTATGGCTGTTTGGGTTGG
>HS078783|Panax ginseng||KYERRC001_31-A05-T3.ab1 Panax ginseng in vitro-cultured adventitious root cDNA library Panax ginseng cDNA, mRNA sequence.
GCACGAGGGTCCTTTAGTCTATCGGTGGAGCTCTCTCTAGGGTTTCGACACTGTAAAAGCTGGGAGGCGAGAGAGTAGGCTTTAAGACAAAAGAGTTACAGTCATGACGGATTATTTGCAGGATCAGGAGATGGAAATTGAAGCACTAGAAGCCATACTTATGGATGAGTTTAAAGAAATTCACCCCAGTGAAAGTGGGCTGAACACTTCAAATCGTTGCTTTCAAATTACATTATCTCCACAGGATGATGAGGCTGATAATTCAACAACTACTCCAGTTCAGTTGGGTTTGATTTTCTCGCACACAGAAAAATATCCAGATGAACCACCACTTCTGAATGTGACGAGTTTAAGAGGAATTCAGATGGGAGACCTTAAGATTTTGAAAGACAAACTCGAACAGGAGGCATTTGAGAATCTTGGTATGTCTATGGTCTACACACTAGTTACTTCAGCTAAGGACTGGCTTTCTGAAAGGTTTGCTCAAGATGATGATGTTGAGAACACCGAAGAAGATGAGAATGCAAAAGATGAAATAATTGTACCACATGGAGAACCAGTAACTGTTGATACATTTTTGGCATGGAGAGAAAGATTTGAAGCAGAATTAGCCTTAGAAAGAGCCAAGTTAATGCCCGAGGCAGCACTTTCGGCACCCAAGGAAAAGAAGCTAACAGGCAGACAGTGGTTTGAAAGTGGAAGAGCTACTACGAAAGGTGCAACAGCAATCACTGAAGGTTCTGACAAAGAGGATGATGAAGACATTGACTTTGATGATGATGACTTCGAAGATGATGAAGAAGAAGATATGCTTGAGCACTACCTGGC
>HS078761|Panax ginseng||KYERRC001_30-G07-T3.ab1 Panax ginseng in vitro-cultured adventitious root cDNA library Panax ginseng cDNA, mRNA sequence.
GCACGAGGTACTCTTCGCTTCTTCCTCTTCCTAAAGAACAATGGCATCCCATACTGTTGGTTACCCACGCATGGGCCCAAAAAGAGAGCTCAAATTTGCTCTTGAATCTTTCTGGGATGGGAAGAGCAGTGCTGAGGACTTGCAAAAGGTGGCTTCTGATCTCAGGTCATCCATCTGGAAGCAGATGAATGATGCTGGCATCAAGTACATTCCCAGCAACACATTCTCATACTATGACCAAGTTCTTGATACAACTGCAACGCTCGGGGCTGTTCCTGCTAGGTACAACTGGAATGGTGGTGAGATTGGATTTGACACTTACTTCTCCATGGCTAGAGGAAATGCCTCTGTTCCTGCTATGGAAATGACCAAGTGGTTTGACACCAACTACCATTACATAGTTCCTGAATTGGGACCTGAGGTGAAGTTTTCTTATGCATCACACAAAGCCGTGACTGAATACAAGGAGGCTAAGGCGCTTGGTGTAGATACCGTCCCCGTCCTCGTTGGCCCTGTCAGCTACTTGTTGCTATCTAAGCCTGCAAAGGGTGTTGAGAAAACATTCAATCTTCTCTCCCTTCTTGACAGCATCCTTCCAATTTACAAGGAAGTAGTGGCCGAGTTGAAGGCTGCTGGTGCTTCATGGATTCAGTTTGACGAACCCACACTTGTGAAGGATCTTGAAGCACACCAATTGGAAGCATTCACTGAGGCCTACTCTGAGCTAGAGTCATCTCTATCCGGCCTTAATGTTCTCATTGAGACATACTTTGCTGATGTTCCTGCTGAGGCATTCAAAACCCTCACTGC
>HS078709|Panax ginseng||KYERRC001_30-C03-T3.ab1 Panax ginseng in vitro-cultured adventitious root cDNA library Panax ginseng cDNA, mRNA sequence.
GCACGAGGCTCCATTTTAGGGATCAGTAAGAACTACTATTCTCCGCTTCTTCCCCTTCCTAAAGAACAATGGCATCCCATATTGTTGGTTACCCACGCATGGGCCCAAAAAGAGAGCTCAAATTTGCTCTTGAATCTTTCCGGGATGGGAAGAGCAGTGCTGAGGACTTGCAAAAGGTGGCTTCTGATCTCAGGTCATCCATCTGGAAGCAGATGAATGATGCTGGCATCAAGTACATTCCCAGCAACACATTCTCATACTATGACCAAGTTCTTGATACAACTGCAACGCTCGGGGCTGTTCCTGCTAGGTACAACTGGAATGGTGGTGAGATTGGATTTGACACTTACTTCTCCATGGCTAGAGGAAATGCCTCTGTTCCTGCTATGGAAATGACCAAGTGGTTTGACACCAACTACCATTACATAGTTCCTGAATTGGGACCTGAGGTGAAGTTTTCTTATGCATCACACAAAGCCGTGACTGAATACAAGGAGGCTAAGGCGCTTGGTGTAGATACCGTCCCCGTCCTCGTTGGCCCTGTCAGCTACTTGTTGCTATCTAAGCCTGCAAAGGGTGTTGAGAAAACATTCAATCTTCTCTCCCTTCTTGACAGCATCCTTCCAATTTACAAGGAAGTAGTGGCCGAGTTGAAGGCTGCTGGTGCTTCATGGATTCAGTTTGACGAACCCACACTTGTGAAGGATCTTGAAGCACACCAATTGGAAGCATTCACTGAGGCCTACTCTGAGCTAGAGTCATCTCTATCCGGCCTTAATGTTCTCATTG
>HS078693|Panax ginseng||KYERRC001_30-A11-T3.ab1 Panax ginseng in vitro-cultured adventitious root cDNA library Panax ginseng cDNA, mRNA sequence.
GCACGAGGCCCCCTTCCCATCAATTGTCAGAAAAAAACTACATCTACTTGCGTGCCGATCTCGTTCATATAGAAGTAGTACTATATATTTATTAGTATTAGATACAGATTATATCCGTAATGTTCTTTATCAGCTACGATTTGCTTCTGAAAATCTCTCTCCAACGATTGTATTTTTAACTTCTATCTCCCAATCGTTAAGTTCATCATCTAGTTTCAGTCACCATGACAGTTGACTCTTCAAAATCTCAAGATGATCAGTGCAAGGATGCTAGGAGCTCATATTTTAACTTGCCAGCATTGGATGTTTCCGTTGCATTCCCCCAAGCCACACCAGCATCCGTCTTTCCTCCTTGTGCTTCAGACTACTACCACTTTGATGATCTTTTGACTCCTGAGGAACAAGCCATCAGAATAAAAGTCAGAGAGTGCATGGAGAAAGAAGTTGCACCAATAATGACTAAGTATTGGGAGAAGGCAGAATTCCCATTTGAAGTTGTTCCAAAACTTGGTGCCCTGTGCATTGCTGGCAGCAGCATCAAGGGCTATTCTTGTCCCGGTCTTTCTATCACTGCAAGTGCTATAGCAACGGCAGAAGTGGCTAGAGTTGACGCAAGTATCTCTACTTTCATTTTGGTGCATTCTTCTTTGGCAATGCTCACTATCGGAATGTGTGGGTCAGAAGGACAAAAGGAGAAATATTTACCATCATTAGCCCAACTAAACACCATAGCTTGTTGGGCTTTGACTGAACCTGACTATGGGAGTGATGCAAGTGCT
>HS078674|Panax ginseng||KYERRC001_29-H04-T3.ab1 Panax ginseng in vitro-cultured adventitious root cDNA library Panax ginseng cDNA, mRNA sequence.
GCACGAGGCCTATTTTTCTCTGGATTATTATTGTTAGTAAGAATAACAAGTAAGAACCGGTCGCATACTCTTCCCGGTTCTCTCTCTTCCTAAAGATCAATGGCATCTCATATTGTTGGTTACCCACGCATGGGCCCCAAGAGGGAGCTCAAGTTTGCTCTTGAATCTTTCTGGGATGGAAAGAGCACAGCTGAGGACTTGCAAAAGGTTGCTGTTGACCTCAGGGCATCCATCTGGAAACAGATGTCTGATGCTGGCATCAAGTACATCCCCAGCAACACTTTCGCATATTATGACCAGGTTCTTGACACAACCGCGATGCTTGGGGCTGTTCCCGCTAGGTACAACTGGAATGGTGGTGAGATTGGATTTGACAATTACTTTTCCATGGCTAGAGGAAATGCCTCTGTCCCTGCTATGGAAATGACCAAGTGGTTTGACACCAACTACCATTACATAGTTCCTGAATTGGGACCTGAGGTGAAGTTCTCTTATGCATCACACAAAGCAGTGACTGAATACAATGAGGCCAAAGCGCTTGGTGTAAATACCGTCCCAGTCCTTGTTGGCCCTGTCAGCTACTTATTGCTATCTAAGCCTGCAAAGGGTGTTGAGAAAACTTTCAATCTTCTCTCCCTTCTTGACAGCATACTTCCAATCTACAAGGAAGTAGTTGCTGAGCTTAAGGCTGCTGGTGCTTCATGGATTCAGTTTGATGAGCCCACTCTTGT
>HS078646|Panax ginseng||KYERRC001_29-E12-T3.ab1 Panax ginseng in vitro-cultured adventitious root cDNA library Panax ginseng cDNA, mRNA sequence.
GCACGAGGGTCGTTAGGAAGTTTTTGAAGCGATAGTGAAGGATTCCCTTAGCCCTTTATATAATACAAAAATCGTCCTTCGACGACTTACTAGTGTTCAAGCTCAACGTAGAGGAAAACGGGCTATACAGGTTTTGAAGAAACTAGCTCGTCGAAAACTCTTGTATCATTCTTATTCTATGCAAGTTCATGGCTATGTGTGTTCATCAACAACTGGTGATGATGGCTCATTTACCCTTGTTCATGGATATCATGGTAGTTTTTCATTAAGACATTGGCTCCAGCAATCTGATTGGCTTCCAACTTTAGAAGCAACTCTTGCTCTAGATGAGGAATCTGTGAGGAGGGTGGGAGATGATACAGTGGGGGGACCTTCCGTTTCTCGACAGTTGCGTATTATTCGGGTCCTGATGAGAGATCTTTTAATTGGAGTGAATTACTTACATAGCCATGGACTTGCTCATACAGAATTGAGGCTAGAAAATTTACATATAAGTCCTCTTGATCGGCATATTAAAGTGGGGATATTAGGAAACGCTGCCGACTTTTCTGACAATAGTCTAAATAATAGCGCACTGGATAATGATACTCACAGGCGGCAAATGATGATTGCATTTGACATGAGATGTGTTGGATTCATCATGGCCAAAATGGTGTTGCGAGAGCTCATGGAACCATTGATATTTTCAAAGTTCAAAGCATTCCTGACACAGGGAAATGATCCTTCCTGTCTGCGTGAGTTCTTACTGCAAACTCTCAATAGGACATCCACATCTGGAAATGCTGGACTACAAATACTTG
>HS078644|Panax ginseng||KYERRC001_29-E10-T3.ab1 Panax ginseng in vitro-cultured adventitious root cDNA library Panax ginseng cDNA, mRNA sequence.
ATTAACATTGTGGTTATAGGACATGTCTACTCTGGAAAGTCTATCACTACAGGTCACTTGATCTACTTACTTGGTGGTATTGACAAGCGTGTTATTGAAAGGTTTGAGAAGGAGGCTGCTGAGATGAACAAAAGGTCGTTCAACTATGCTTGGGTGCTTGACAAGCTCAAGGCTGAGCGTGAACGTGCTATTACCATTGATATTGCCTTGTGGAAGTTTGAAACCACCAGGTACTACTGCACAATCATTGATGCCCCTGGACATCGTGACTTTATCATCAACATGATTACTGGTACCTCACAGGCTGACTGTGCTATCCTCATCATTGACTCCACCACTGGTGGTTTTGAAGCTGGTATCTCTAAAAATGGTCAGACCCGTGAGCATGCTTTACTTGCTTTCACCCT
>HS078621|Panax ginseng||KYERRC001_29-C11-T3.ab1 Panax ginseng in vitro-cultured adventitious root cDNA library Panax ginseng cDNA, mRNA sequence.
GCACGAGGCGCGCTTTGAGAAGGAAGGACGCTTTCAGAGGCGAAAGGCCATGCCTTGATACCGTCTGTGATCCATGGATCTCCGATCGGGAAACCGTATCCAAGCTCCGTGGCTAGTCTGCGCTCTTTGGACTTTTCAAACTTAGCGAACTGAAACATCTGAGTAGCTAAAGGAAGGGAAATCAACCGAGACTCCGTTAGTAGCGGCGAGCGAGAGCGGATTGGGGGTTTGAAGAAAAACAAACACGAAGCTTCGTTCCGATCCTTTCTATTCTAGTCGAGTTACTACGTTCCTCAGCAAAGTGTTCACTTCTTTTTCGCCAGGTTTCATTCGATTTTTTTTTGATTGGATGATGGAAAAACCAGCAAGCTACGGCTTCAAAGCTGACCTTATTATTATGAAAAGGAGAAAGGGCTTTTTATAGAGAGAGGTTGAGTAAGGGGGGCGGAGCTTGAAGAGCGAAGCGAGCCGCGCTAGCCTATTACGTTTTTCAGCAGCAAGCTACGGTCTAACGACCCCCTAACCTAGGTTGGGGCGAAAACTCCAAAACTCGGGTTCCGATCCTATATATTCTAGTCCCGTTCCAAACCTTTCTCTAATAAGAAGGTCCGCTTTCAAGCCCCTTGACTTTCTATTCTATTAGTCAAGGGCGCAGTGAACTGTAATTGTGAAAAGGTTGGAAGATCTGGCCAAAGAAGGTGATAGCCCTGTAGATTCGTTCCCATGGTTCGATCC
>HS078612|Panax ginseng||KYERRC001_29-C02-T3.ab1 Panax ginseng in vitro-cultured adventitious root cDNA library Panax ginseng cDNA, mRNA sequence.
GCACGAGGCCCCCTTAATGTTCCTTATAAATTACCGAACAACAATTTTCCGCTCCTTGTTTTGTTTTTTTTCTTCTATCCTTTTTTTTTCCTTCTTGTTTTCTTTTCAATTCCCAAATTCAATCTGGGCTTTCAGAATTTTAGGGTTAGGGTTTAGTAAACATGTGCGATTTGGTAGTTGGTGAAGATGATTTAACGGAACAAATCGATTGGGAACGCCTATTGAATGATTATACTCTGCAGTTTGATGATTCGAATTTCTTCGATCATATAAATCTCTGCGATGGTTCTTCAGAGCAGTTATCGGATCCTTCTCCTGATACTCCTGTTTTTCTCGATGAGATCGAGAAGTTTCTGATGAACGATGACGGCATTGATAGGGTTGATGACGTTTCGGTTCCGAACGAGGTGGGCAATTGTTTATTTTCCGATATTCTGCTTGATTCGCCCGTTGAATCCGACGACGGTGGTCAGAAATCGAGTTCGCCGGAGGTTGAAAATAATAACAACGCCACCGACGATGGAGGCCATGGAGAGGCGGATGACCCTATTTCTAAGAAACGAAAAAGGCAAGAGAGGAACAGGGATGCAGCCTTGAGATCGAGAGAGAGGAAGAAGCTGTATGTTAAGGATCTGGAGATGAAAAGTAGGTACTTTGAAGGGGAATACAAGAGACTGGGAATGTTGCTCAACTGTGTCATAGCTGAGAACCAAGCTTTACGCATTTCCTTGAATAGTAGTAAGGCATTTGATGCTTCCATGACCAAGCAGGAGTCTGCTGTGCTCTTGTTGGAATCCCTGCTGTTGG
>HS078607|Panax ginseng||KYERRC001_29-B09-T3.ab1 Panax ginseng in vitro-cultured adventitious root cDNA library Panax ginseng cDNA, mRNA sequence.
GCACGAGGCTCCCTTACTTTCTCTGGATTATTATTGTTAGTAAGAAAAACAAGTAATAACCGGTCGCATACTCTTCCCGGTTCTCTCTCTTCCTAAAGATCAATGGCATCTCATATTGTTGGTTACCCACGCATGGGCCCCAAGAGGGAGCTCAAATTTGCTCTTGAATCTTTCTGGGATGGAAAGAGCACAGCTGAGGACTTGCAAAAGGTTGCTGCTGACCTCAGGGCATCCATCTGGAAACAGATGTCTGATGCTGGCATCAAGTACATCCCCAGCAACACTTTCGCATATTATGACCAGGTTCTTGACACAACCGCGATGCTTGGGGCTGTTCCTGCTAGGTACAACTGGAATGGTGGTGAGATTGGATTTGACAATTACTTTTCCATGGCTAGAGGAAATGCCTCTGTCCCTGCTATGGAAATGACCAAGTGGTTTGACACCAACTACCATTACATAGTTCCTGAATTGGGACCTGAGGTGAAGTTCTCTTATGCATCACACAAAGCAGTGACTGAATACAATGAGGCCAAGGCGCTTGGTGTAAATACCGTCCCAGTCCTTGTTGGCCCTGTCAGCTACTTATTGCTATCTAAGCCTGCAAAGGGTGTTGAGAAAACTTTCAATCTTCTCTCCCTTCTTGACAGCATACTTCCAATCTACAAGGAAGTAATTGCTGAGCTTAANGCTGCTGGTGCTTCATGGATTCAGTTTGATGAGCCCACTCTTGTGAAGGATCTTGAAACTCACCAATTGGAAGCATTTACCAAGGCCTACTCCGAACTAGAGTCATCTCTATCTGGTCTTGATGTTCTCATTGAGACCTACTTTGCTGATGTTCCTGCTGA
>HS078491|Panax ginseng||KYERRC001_27-H09-T3.ab1 Panax ginseng in vitro-cultured adventitious root cDNA library Panax ginseng cDNA, mRNA sequence.
GCACGAGGTGCCTTTGGAGTTGCAGGTGAAAATTATGATAAATCAAAGCAAGTTCTGCTTGTGAAAGCATTTTTAACTGCCCGTGACTTGATTCTTGAAGAGCTACGAAAACTCAGCAGAGCAATAAATGAAAATATTGATTTGACTGATTTTACTTCAAAACTTGAGGACAAAATGTTGTTTGGCTTGTCTCCAAAAGTGGGTTGGGGGATCGCAGATGCTGAAGTCTCTGGACAGAAGTCAAGCATGTTACAAAATTTTCCAGAGAAATGTAATGGTAATGTGGATTTGCAAAGCGACTTCTTTCACTCGTTATCTAAGGATGAACTAGTCTGTGCTTTCCATTCACTAGGGGATCAGTTGTTGTATCTATGGAACATGTTTCTGCAGTTCCACAGGGCTAACAAATCAAGGATTATGGAATTTCTGCGTGATGTGTGGGCTCGTGATAGAAAAGCTGAATGGTCAATATGGATGGTGTACTCTAAGGTTGAGATGCCTCACCAGTATATAAGTAGTGAGGTTGATGGCTCTTCCCAACCAGCTGTTCGTCGAAAAGCACTTGTTCTGCGAAAGTTAACCGAAGATCCAGCCCAGACTGCAGCTACACGTGCGGAGCTTCATCGTCGTAGTATTGCACAGATGAGGATCAACAGTCGGTCAATTCAAGACATGCATATATTTGGAGATCCATCACGCATTCCCATTATAATTGTAGAACGTGTTGTGAATGCTCCAAGGCGTTCCACAAGTGGAAACTCATTCTTCATCCA
>HS078466|Panax ginseng||KYERRC001_27-F08-T3.ab1 Panax ginseng in vitro-cultured adventitious root cDNA library Panax ginseng cDNA, mRNA sequence.
GCACGAGGCACCGTTTTATCGAGAAATCTGGATAGATCCGGAGATGGCGTCGAGCGAGCAAACCAATCTGCAGTTCGTGCCGTCGCCGACAAATCCGGAGATGGCGTCGAGGGAGCAAACGATTCTGCAGTTCGTGCCGTCGCCGACGAGTTTGTCGGCGAAGGTTCACCCGCTGGTGATATTCAATATATGCGACTGCTTTGTGAGAAGACCAGACCAAGCCGAGCGAGTCATCGGTACTCTTCTGGGCTCTGTATTGGCCGATGGCACTGTTGATATTCGCAACTCCTATGCCGTTCCTCACAACGAATCATCAGATCAGGTTGCGCTGGATATTGATTACCACCACAATATGTTAGCATCACACCTAAAAGTGAATCCAAAGGAAGTCATGGTTGGATGGTTTTCAACTGGATTTGGAGTTACTGGCAAGAGTGCTCTAATTCATGAGTTTTATTCGAGAGAAACTGAGAATCCTATCCATCTGACAGTTGACACCGGATTCACAAGTGGGGATGCTACAATTAAAGGGTTCGTCTCTGTTAACTTATCTCTTGGTGAACAACAGCTTGCGGCACAGTTTCAAGAGATTCCATTAGATCTAAGGATGGTTGAAGCTGAGCGCATTGGATTTGACATCCTTAAGAAAACGGCAGTGGACAAACTCCCAAATGATTTGGAAGGAATGGAAGCTTCAATGGAGAAGTTACTAGCTCTGATTGATGATGTTTCCAAATATGTTGTTGATGTTGTGGAAGGGCGCGTTGCACCAGACAATAACATTGGGAGATTTATATCAGATACTGTTGCTGCTATTCCCAAACTGTCTCCCCCAGCTTTTGATAAGCTTGTGAATG
>HS078439|Panax ginseng||KYERRC001_27-D05-T3.ab1 Panax ginseng in vitro-cultured adventitious root cDNA library Panax ginseng cDNA, mRNA sequence.
GCACGAGGTCCCCTTTCAGCAGCAAACCCTAGCTTACCCGCCCCTTCTTCTCCTCCCTCTGCACACTCTCTCCCTCTATTCAGTCAATCATGGGTAGAGTACGAACCAAGACCGTGAAGAAATCGTCCCGCCAAGTGATCGAGCGGTACTACTCGAAAATGACACTCGATTTCCACACCAACAAGAAGATCCTGGAAGAGGTGGCGATTATCCCCTCCAAGCGCCTCCGCAACAAGATTGCTGGATTCTCCACTCACTTGATGAAGCGCATACAAAAGGGTCCAGTTCGCGGCATCTCCCTCAAGCTTCAGGAAGAGGAAAGAGAAAGGCGCATGGATTTCGTCCCAGATGAGTCTGCCATCAAGACTGACCGCATCGAGGTTGACAAGGAGACCATTGACCTTTTGGCTTCTCTGGGTATGAGTGAACTTCCTGGGATTGTGCTCAAGGAGGAGCAAGCTGCTGCCATTTCCTCTTTACCGCCTTACGGTGGTGGCCGTGGTGGTTTTGCTGGTGGTGCAAGTGGCAGGAGGTACTGATTTGGGGGTTCAGTGGTAATGGATTTTGCGTAGTTTTTGTTATGCAACCTTTTCTTGAATGAGTCACTTTTAAGTTTCTCGATAAATGAATATTGTTATTGTTGGTTTAATTCGGATTATGTTGGAAGAGATTTAAATTTTATTTTAATTCGTACTTCTATTTTAAACTTTGAAAAAAAAAAAAA
>HS078420|Panax ginseng||KYERRC001_27-B10-T3.ab1 Panax ginseng in vitro-cultured adventitious root cDNA library Panax ginseng cDNA, mRNA sequence.
GCACGAGGCACCTTTGTGGAACTTCAGGCTGTTGACGAGTTTAACAATTCAATGCGTGGTAAAAAACCTGCAAAGTGCAAAGTCATTGTTTCTTCGCACAACTATCAAAATACTCCATCTGTTGAAGATCTTGGGAACCTTGTGGCTATCATACAAGCAAGTGGGGCTGACATAGTGAAGATTGCAACCACTGCCTTGGATATTACCGATGTGGCACGTATTTTCCAAATAACTGTTCATTCTCAAGTTCCAATAATAGCAATGGTTATGGGTGAGAGGGGATTGATGTCACGGATACTTTGCCCAAAGTTTGGCGGATTTCTCACTTTTGGTGCCCTTGAGTCTGGAATAGTATCAGCACCTGGGCAACCCACAATCTCAGATTTGCTGAATTTATTCAATTTCAGACAAATAGGTACTGATACAAAAATATTTGGTATTATTGGGAAACCTGTTGGCCACAGCAAATCACCCATTTTATACAACGAAGCATTCAGAGCAGTTGGTTTTAATGGAGTTTATGTGCATTTGTTGGTGGATGACATAGCTAATTTTTTCCAAACTTATTCAGCTACAGATTTTTCTGGGTTCAGTTGTACAATTCCTCACAAGGAGTCTGCACTTAAATGCTGTGACGAGGTTGATTCAGTAGCAGAGTCGATAGGAGCTGTTAATTGCATTATCAGGAGAAACAATGGGAAGTTATTTGGTTGCAATACCGACTATGTTGGTGCTATTTCTGCTATTGAGGATGGCCTACGAAGTTCAATCCATATAAATGGTGCATCTGGGTCACCCTTGGCT
>HS078362|Panax ginseng||KYERRC001_26-E10-T3.ab1 Panax ginseng in vitro-cultured adventitious root cDNA library Panax ginseng cDNA, mRNA sequence.
GCACGAGGCTCCTAATGATGCCTTGTGCATTTCGCTCGATTCGATATGGTTTTTGAGCACACAGCAGGAGCTGTATGGGATAACAGGACTAATTAATAAAATTATTGCTAATGGTGCTTATGACTTCACAAGAGCTGCTCTCAGAACTTCGTTCCTTGCATCCTGTGTCTCTGCTTGCCAAAGTCGGACAATGAGCCTAGCAGATACTGTGTCCGTGATGGCACAACGGTTGCACGAGCGGCTGCAAGAATGCAATGGGGATGAGGTTTTGAAGGCTGAAGCTGGTGCCAAGGTTCAGAAGTTCACTGAATGGGCTCTGAAATGTATAGGTTTTCATTCTCGTTGTCAAGGGAATAGGGATGGCATCAATCAGAACTCGGCTGTCCAGATTCAACTGCAGTTATCTGCATTCAAGTCATTTCTGGATCTTGCTGGCAACCATCTTACAGGAAAGGACTTTACGGAGGCCTTTGATGCAGCTTGTTTTCCCCTTACCCTTTTCTCTAGTTCATTTGATCCTGGTTGGGCATCAGGTATATCAGCAACTGCAATCCAAGGGTTGCTGGGCATATTGGTAGAGGGCGGTGCAGACAATGTCAACCAATGTTTTCTCGAAGCCTCTCGTTTTGGAAGCACAGAGCTTGTTCGCATCTTGTTGCAGATTGCTCAAAGGAACAGCTTGGATGTTGATGTTGATCTGGCTTTGGGCTTCGCTTCCCATTATGGCAAGATTGGAACTATGGAATGTCTAGTTGAAGAAGGGAATGCGATGGCTTTCTTGGGTCCCTTAATGAGAGCTGCTG
>HS078360|Panax ginseng||KYERRC001_26-E08-T3.ab1 Panax ginseng in vitro-cultured adventitious root cDNA library Panax ginseng cDNA, mRNA sequence.
GCACGAGGTGACCATATGAGGAAGATGAAGAACAATGCCATTGTTTGCAACATTGGTCACTTTGACAATGAAATTGACATGCTTGGTCTTGAGACATTCCCGGGTGTGAAGAGAATTACCATCAAACCCCAAACCGACAGGTGGGTCTTCCCCGACACCCAATCGGGCATCATTGTTTTAGCTGAGGGACGTCTGATGAACTTGGGTTGCGCCACTGGTCACCCCAGCTTTGTGATGTCTTGCTCGTTCACGAACCAAGTGATTGCCCAGCTTGAGTTGTGGAAGGAAAGGAGCACCGGGAAGTACGAAAAGAAGGTGTACGTCTTGCCCAAGCACCTTGACGAGAAGGTAGCAGCTCTTCATCTTGGAAAACTTGGTGCTAAGCTCACTAAGCTCAGCAAGGACCAGGCTGATTACATTAGTGTACCAGTTGAGGGACCATACAAGCCTGTTCATTACAGGTACTGAGAAGGAAATGATTGTGAGAAATTGAGAAAAACAGGAAATGTTGAAACGGCTTTGATTGTTTAATTTTAGTACTTTTGCTTATGTTTAGAACACTAGTAGTTGTGAGTTTTATGGGGGTAGGAAAGTGAGGAGGGAGAAAATGGATTGATCTCTGTTGAAGTAGACCATGTTGGGTTTGAATAAGGTGGTTTTTGGGGAGGTGTGGGCAGAAATATTGTAGTTGATCATGTTTTTTACTCATTTGGTTTTCAGTATTGATGGAAAAAAATGTTTTTTTTTTAGTAATATTGTAGTTCCACGGTAAAAAAAAAAAAAAAAAAAAAAA
>HS078321|Panax ginseng||KYERRC001_26-B05-T3.ab1 Panax ginseng in vitro-cultured adventitious root cDNA library Panax ginseng cDNA, mRNA sequence.
GCACGAGGCTTTCTTTCCCTCCTGGCTCTCTGTTTATTCTTCTCCGACTCTAGCTCTTTACCTTCCATTTATGCTCGACTGAGAATTAACATATATCTCCATTAATGGCGGCGGAAGGTTCTCTTCTTGTGAGCTCCGTTACGGAGCTAAAGATAAAGGAGAAGCAGCAGAAGAAAGCGAAATCAGGAGGATTTGAGTCATTGGGTCTGAGTATTAATGTGTTTCGAGGAGTGAAGCGAAAGGGCTACAAAGTCCCAACTCCAATACAGCGCAAAACGATGCCTCTCATACTTTCCGGATCCGATGTTGTCGCCATGGCTCGAACTGGGTCGGGCAAAACGGCGGCGTTTTTGGTCCCTATGCTTGAGAAGTTGAAGCAGCATGTGCCTCAGGGTGGGGGTGTTAGGGCACTTATTTTGTCACCCACTAGAGATTTGGCGCTTCAGACGCTAAAGTTTGCGCAAGAACTGGGTCGATTTACGGATCTTCGTATTAGTTTACTGGTTGGTGGTGATAGCATGGAAAGTCAATTTGAAGAATTGGCACAGAACCCTGACATCATAATTGCAACTCCTGGTAGGCTCATGCACCTTTTGTCTGAGGTTGAGGATATGTCATTCCGTAGTGTGGAGTATGTGGTTTTTGATGAAGCTGATTCTCTCTTTAGCATGGGCTTTGCGGAGCAACTGCATCAAATCCTTACACAACTAAATGATAATCGTCAAACCTTGCTTTTCAGTGCAACTTTACCAAGTGCCCTTGCTGAATTTGCCAAAGCGGGTTTAAGGGACCCTCA
>HS078291|Panax ginseng||KYERRC001_25-G11-T3.ab1 Panax ginseng in vitro-cultured adventitious root cDNA library Panax ginseng cDNA, mRNA sequence.
GCACGAGGCCCTCTTTTTCTCTCTCCCAGCAATAGATCCAAAAGCCGGCTGCCCAATACAAGACAATCACATAAATATATATATACCCAAAAGATATATACATAAATAGAAAGAGAGAGATTGAATCTGGTGAGGGAAAATGGTTAGTAAAACAGAGGAAGTACAAGTGAACCGGTTGGAGAATCAGGTCGATAATGGCGGCGGAGGGGCCTGGGAGTACCTCTCTCTTGTACGGAAGCTAAAGTTTCGACGCTCCGATAAGGTCTTAAAGCACGGATTATCGATTTTGAATGACTCCCAGAAGCGATCTGCTCTTGGTCCTGAAGAATGGACTCTGTATGAACAGGTAGCAATTGCAGCTATGGACTGTCAATGCACTGATGTTGCTAAGGATTGCATAAAGGTTTTACAAAAGAAGTTCCCAGAGAGCAAGAGGGTTGGTAGGTTAGAAGCAATGCTATTAGAAGCAAAGGGATCCTGGGCCGAGGCTGAAAAAGCATACTCAAGTCTTTTAGAGGATAATCCATTAGATCAGGTAATACTCAAGAGAAGGGCAGCTATGACAAAAGCTCAGGGAAACATTTCAGGGACCATTGAAAGGCTCAATCAATATCTTGAAACGTTCATGGCAGATCATGATGCCTGGAGGGAACTTGCTGAAATATATGTCTCCCTACAAATGTACAAGCAAGCAGCTTTCTGCTACGAGGAGTTAATATTATCTCAACCAATGATTCCTCTCTACCATCTAACTTATGCTGATGTGCTATATACACTAGGTGGACTTGAGAACCTTCAAACAG
>HS078283|Panax ginseng||KYERRC001_25-G03-T3.ab1 Panax ginseng in vitro-cultured adventitious root cDNA library Panax ginseng cDNA, mRNA sequence.
GCACGAGGCAGCAATCTCGCCATGGGAAGAAGACCTGCAAGGTGTTATCGCCAGATCAAGAACAAGCCTTATCCAAAGTCTCGGTACTGCCGTGGTGTGCCAGATCCAAAGATTAGGATTTATGATGTTGGAATGAAAAAAAAAGGTGTTGATGAATTTCCGTTCTGTGTTCATTTGGTCAGTTGGGAAAAGGAGAATGTTTCTAGCGAGGCTTTGGAAGCTGCCCGTATTGCTTGTAACAAGTACATGACCAAGTTTGCTGGCAAGGATGCTTTCCATTTGAGGGTCAGGGTTCACCCTTTCCATGTGCTTCGTATCAACAAGATGTTGTCATGTGCTGGGGCTGATAGGCTCCAGACAGGCATGAGGGGAGCTTTTGGTAAGCCTCAGGGAACCTGTGCCCGGGTCAGCATTGGCCAGGTGCTCCTCTCAGTCCGTTGCAGAGACTCGAACAGCCATCATGCTCAGGAGGCATTGCGTCGTGCAAAGTTCAAGTTCCCTGGTCGTCAAAAGATAATAGTCAGCAGGAAATGGGGCTTCACCAAATTTAGCCGTACTGACTATGTGAAGTGGAAGGCCGAAAACCGCATTCTTCCAGATGGTGTTAATGCGAAGCTTCTGGGATGCCATGGACCTCTTGCACGTCGACAGCCTGGGAGAGCATTTATTGACGCAGTAACTGCTTANGGATGTGGATGTTTTCAGGCAACTTATATGCTCCTGTTGAATTGAATCTTTGGGACCCAGTGTACTTGCATTATCAATGTTTCTCGAGTTATTTTCCTTTTGGAAGGTTTTGGTTTCAGCCAGTATTGCACTATG
>HS078254|Panax ginseng||KYERRC001_25-D10-T3.ab1 Panax ginseng in vitro-cultured adventitious root cDNA library Panax ginseng cDNA, mRNA sequence.
GCACGAGGACTCTTTTATTGGTCATGGTGCCAAAGTTATCTTATCTTCTCATCTGGTACGGCCAAAAGGTGTCACCCCAAAGTACAGCTTGAAGCCTCTTGTCCTAAGACTGTCTGAACTCCTTGGAGTTGAGGTCAAGATGGCAAATGACTGCATTGGTGAGGAAGTCGAGAAACTGGTGGCTGGAATATCAGAAGGGGGTGTTCTTCTCCTTGAGAATGTGAGGTTCTATAAAGAGGAAGAGAAGAATGACCCTGAATTTGCAAAGAAGCTAGCATCTCTCGCAGACTTATATGTTAATGATGCGTTTGGCACTGCACATAGAGCCCATGCTTCCACTGAGGGCGTGACAAAGTACTTGAAACCTGCTGTTGCTGGATTCCTGATGCAGAAGGAGCTTGACTATCTAGTTGGAGCTGTTTCAAATCCCAAGAAACCATTTGCTGCAATAGTTGGTGGGTCAAAGGTGTCAAGTAAGATTGGTGTAATTGAGTCACTGCTGGCAAAGGTTGACATTCTCGTGCTTGGTGGAGGAATGATATTCACTTTTTATAAAGCCCAAGGGTTGTCAGTTGGATCATCACTTGTGGAGGAAGATAAGCTTGATCTTGCAACCTCACTACTTGCGAAGGCAAAGTCTAAAGGGGTATCTCTTTTGCTCCCTTCTGATGTGGTTATTGCTGACAAGTTTGCTCCTGATGCTAACAGCAAGATCGTTCCAGCAACTAGTATTCCTGATGGCTGGATGGGTTTAGATATTGGACCGGATTCCATTAAGACATTCAGTGAAGCGTTGGATACTACAAAAACCATTATTTGGAATGGACCCATGGGCGTGTTTGAGTTTGACAAGTTTGC
>HS076637|Panax ginseng||KYERRC001_07-F03-T3.ab1 Panax ginseng in vitro-cultured adventitious root cDNA library Panax ginseng cDNA, mRNA sequence.
GCACGAGGCTCCGTTCTTAGATCATCCCCTGGAAGTACTAGTGCAGCAGATGCATCATCAAGATTTGCTACCACTGGCAATGCACCACCAGGAAAAGCAGTACTAGATAGGTCAGAGTCATCTGCTACAAATAACTCTGATGAAGAGGCACACCAATACTGGCGCTGCCAGCTCCCTGACGACATCACTCCTGACTTTAAGGTCACGAGGGAGGATGACACTCCACGTATTAATATCCTGCCCTTTTCAAACCTATCCTTAATCGATGTCAACGAAACGTCAAGGTTTCCCGCTTCACCGGGTAGCAGCTTGATATTGAACGGACAGCAGGAATTATCTCCTCATCGAATCAATGGTGGTAGCTTTTCCGAGAAGATGGGATTTTCTGTTGCATCATATGCTGAAGATCCATCCGCAGCCGGTTTTCCTAATTTGCATGCTAAACCTTGGGACAGGCAAATTGTGAGTAATGATCAGCTTTTTAACAGTGTTAGAGAGGGCACCCCTTACAATGGGAATTCTGGGAAGAGGTTCCTAAATGATGTGTTGTATGAGCAACAGATGCTGGATGGTACAGATGTAAATCCTCTCGAGTTTTTAGCTTCACAATTTCCTGGTTTTGCGGCTGATAGCCTTGCTGAGGTGTACTTTGCTAACAGGGGTGATTTGAACCTGACAATTGAGATGCTTACTCAGCTTGAGCTTCAAGTTGAAGGTGGTTTAAATCAGAATCTCAACTCAAAGGCCTTGTCAGCTCCAAATCTTAGTGCACTAGATTTTCCTGCACTATCTGTTGTAGATGGTCACAATGGAATGCCAAAATTCTCTGGAGATGAGCTCCAACAAAATGTTAGTCCTTATTCAGCTTCCGAGAAGGAAAACTTGCTCTTATTCAAATCTAGCT
>HS076619|Panax ginseng||KYERRC001_07-D08-T3.ab1 Panax ginseng in vitro-cultured adventitious root cDNA library Panax ginseng cDNA, mRNA sequence.
GCACGAGGCCACACCTTGCTTCAAGGAGGAGGAGAGTACCAAGTTCTAACCATATTTATAGGCACTTTCTCTCTCTTTAAGGAATGGATACATTCTTGTTCACATCTGAGTCCGTCAATGAGGGACATCCAGACAAACTTTGCGACCAGATCTCAGATGCAGTCCTTGATGCCTGCCTAGCACAGGACCCTGAGAGCAAGGTTGCCTGTGAGACCTGCACCAAGACCAACATGGTCATGGTCTTTGGAGAAATCACCACCAAGGCTGATGTAGATTATGAGAAAATTGTGCGTGACACTTGCCGTGCAATTGGATTTGTATCTGATGATGTGGGTTTGGATGCCGACAACTGCAAGGTCCTTGTCAAGATTGAGCAACAGAGCCCTGATATTGCCCAAGGTGTCCACGGTAATCTGACCAAGAGACCTGAGGAGATTGGTGCTGGTGACCAAGGTCATATGTTTGGTTATGCAACTGATGAGACCCCTGAGCTGATGCCCCTCAGCCATGTTCTTGCTACCAAGCTTGGAGCTCGCCTAACTGAAGTCCGCAAGAATGGTACTTGTGCCTGGCTAAGGCCTGATGGTAAAACCCAAGTGACTGTTGAGTACCAGAACGACAATGGTGCCATGGTCCCCATTCGTGTGCACACTATTCTGATCTCCACCCAGCATGATGAGACTGTTACAAATGATGAGATTGCTGCTGATCTTAAGGAGCATGTCATCAAGCCTGTTGTTCCTGAGAATTATCTGGATGAAAAGACCATTTTCCACTTGAACCCATCTGGCCGCTTTGTCATTGGTGGACCTCATGGTGATGCTGGTCTAACTGGC
>HS076615|Panax ginseng||KYERRC001_07-D04-T3.ab1 Panax ginseng in vitro-cultured adventitious root cDNA library Panax ginseng cDNA, mRNA sequence.
GCACGAGGCACCTTTATGCTTCTCTCTAGCGGCTACTGTTTTACAGCAAAAAGGCTTCTTCAAAGTTATTAGCAATTCATTATGGGTAAGGAAAAGTTTCACATTAACATTGTGGTCATTGGCCATGTGGATTCTGGTAAGTCAACCACCACTGGTCATCTCATCTACAAGCTCGGGGGTATTGACAAACGTGTCATTGAGAGGTTCGAGAAAGAAGCTGCTGAGATGAACAAGCGTTCATTCAAGTATGCGTGGGTGCTTGACAAGCTCAAGGCCGAGCGTGAGCGTGGTATCACTATTGATATTGCTCTGTGGAAGTTTGAGACCACCAAGTACTACTGCACAGTCATTGATGCTCCTGGACATCGTGACTTCATTAAAAACATGATTACTGGAACTTCCCAGGCTGATTGTGCTGTCCTTATCATTGACTCCACTACCGGAGGTTTTGAAGCTGGTATCTCCAAGGATGGGCAGACCCGTGAGCATGCTTTGCTTGCTTTCACCCTTGGTGTCAAACAGATGATCTGTTGCTGCAATAAGATGGATGCGACAACCCCCAAGTACTCCAAGTCTAGGTTCGAAGAAATTGTTAAGGAAGTGTCTTCATATTTAAAGAAGGTGGGATACAACCCTGAAAAGATTGCATTTATCCCCATCTCTGGATTTGAAGGCGACAACATGATTGAGAGGTCTAACAACCTTGATTGGTACAAGGGCCCTACCCTTCTTGAAGCCCTTGACCTGATCACTGAGCCCAAGAGACCCTCCGATAAGCCCCTTCGTCTCCCTCTCCAGG
>HS076600|Panax ginseng||KYERRC001_07-C01-T3.ab1 Panax ginseng in vitro-cultured adventitious root cDNA library Panax ginseng cDNA, mRNA sequence.
TTTCCTTCAAGGATGACCCTTGCAATGCTTTTGGAATCTATTGCTGCTAAGGGAGGTAGCTTACATGGAAATTTTGTGGATGCAACGCCATTTGCTAGCTCACTGAAGACTGATGAAAAGAAGGAATCTGAATCCAGTACTCTTGTTGATGAACTTGGTTCTATTCTGACTGCTAAAGGTTTTAACTACTATGGTGCGGAGGTACTGTATAGTGGAGTTTATGGGACGGAACTAATGTGTGAGATTTTTATTGGCCCTGTTTACTATCAGCGACTTCGCCACATGGTCTCAGACAAATATCAGGTTCGATCGAGTGGGAGAGTAGACTCAGTAACCCGACAGCCTGTCAAGGGAAGAAAGCAGGGAGGAGGTATCCGGTTTGGAGAAATGGAAAGGGATTCCCTTCTTGCTCATGGGGCAGCATATTTGTTACATGACAGGCTTCACACAAGTTCAGATCATCACATTGCTGATGTTTGTTCCATTTGCGGTAGTATCCTCACGACGTCACTTGCCCAGCCACAAAAGCGAGCAGTCCGGGAAATTGCTGGCATCCCACCTGGTAGAATCCCCAAGAAGGTTATGTGTGTTGCTTGCCAGACTAGCAAGGGAATGGAAACTGTTGCAATGCCATACGTCTTTAGATATTTAGCAGCAGAATTAGCAGCTATGAATATAAAATTGACCCTCCAGTTGAGTAACGGAGCAGGAGCCTGATTTTGCCCATTGGTTTGTTCTGCTGTTATCAGTTCAATTAATCATGTAATGTTGTAATGTATCATTTGTGGATAGAATGTGTCCAATTAGAACTGGTGATCAAATATGAATTTCAAATTTATTTGTAAA
>HS076542|Panax ginseng||KYERRC001_06-E07-T3.ab1 Panax ginseng in vitro-cultured adventitious root cDNA library Panax ginseng cDNA, mRNA sequence.
GCACGAGGGCCCGTTGGTCTCCTCTGGCTTCTCTTAACTGGAAAGGTACCAACTCATGAGCAAGTTGATGCATTATCAAAGGAATTACGAAGTCGTGCCGCTGTACCAGATCATGTGTATAAAGCCATCGATGCCTTACCTGTTACAGCTCATCCTATGACTCAATTTGCAACTGGTGTTATGGCTCTTCAGGTTCAAAGTGAATTTCAGAAGGCATATGAGAAGGGGATCCACAAATCAAAGTACTGGGAGCCAACATATGAGGACTCTCTTGCTTTGATTGCTCAAGTACCAATTGTAGCAGCATATGTCTATCGCAGGATGTACAAGAATGGACAAACTATATCAACAGATGACTCCCTAGATTACGGTGCAAATTTCGCCCACATGCTTGGTTTTGATAGTCCCAGCATGCAAGAGCTTATGAGGCTTTACCTTACCATCCATACTGATCATGAAGGTGGAAATGTTAGCGCTCATACTGGACATCTAGTTGGTAGTGCTCTTTCAGATCCGTATCTTTCCTTTGCAGCTGCATTAAATGGTTTAGCTGGACCACTCCATGGTTTGGCAAATCAGGAAGTTTTGCTGTGGATCAAATCTGTGGTTTCTGAGTGCGGAGAAAATATGACCACCGAACAGTTGAAAGAATATGTTTGGAAAACCTTGAACAGTGGAAAGGTTGTTCCTGGATTTGGACATGGAGTTCTGCGTAATACAGATCCAAGATACACATGTCAGAGAGAGTTTGCATTGAAGCATTTACCCGATGATCCACTCTTCCAACTGGTTTCGAAGCTTTATGAAGTGGTGCCTCCTATTCTTACAGAACTTGGCAAGGTGAAAGACCCCTGGCCCAATGTTGATGCACACAGTGGGGTATTGCTGAAT
>HS076532|Panax ginseng||KYERRC001_06-D09-T3.ab1 Panax ginseng in vitro-cultured adventitious root cDNA library Panax ginseng cDNA, mRNA sequence.
GCACGAGGCGCCCTATAGAGTAGAGAGAGAAAGTGGAGAGAGAAATTTGAGTGACAAATACCTCTATGCGAGAAACAGACATATATAGATAGATACAGACAGAGAGAGTGCAACTAGCTAGAAGAGAGAGAGAGAGAGCAGTTGTTTCTACCTCGAGCTCGTCGTTTCTCCAACCCTGAGTCTTCTATTATATCTTCAATCGATCTCTTCGTTTTGTAATCCATCTCTATCGGTGCAAGTCTCCTTTGAGCTTCTTTCTATCTGCTAATATGCTGGCTTGATTGATTGATTATCTTTCTCTGGATTTGAAGACGGCTTAGATACAATGTCTTCTCTCAGTAGAGAGCTTGTGTTCTTGATCTTACAGTTCCTAGATGAGGAAAAATTCAAGGAGACTGTTCACAAGCTTGAACAAGAATCTGGATTTTACTTTAACATGAAATACTTTGAGGAAGAAGTACATAATGGGAACTGGGATGAGGTTGAGAAATACCTCTCTGGTTTCACAAAAGTGGACGACAATCGGTACTCGATGAAGATCTTTTTTGAGATAAGGAAGCAGAAATATCTAGAGGCATTGGATAAGAATGATCGATCCAAGGCTGTGGAAATCCTTGTAAAGGATCTTAAAGTTTTTGCATCATTTAATGAAGAGCTTTTCAAGGAGATTACTCAGCTTTTAACATTGGAGAACTTCAGGGAGAATGAGCAGCTGTCCAAATACGGAGATACAAAATCCGCAAGAGCAATTATGTTGGTTGAGCTCAAGAAGCTTATTGAAGCAAATCCCTTGTTTCGTGACAAA
>HS076510|Panax ginseng||KYERRC001_06-B09-T3.ab1 Panax ginseng in vitro-cultured adventitious root cDNA library Panax ginseng cDNA, mRNA sequence.
GCACGAGGAACCTATTTACAGTTTTTCGTTTGCTAAGCTTTTCGGTTGAACTATGGGTAAGGAAAAGTTTCACATTAACATTGTGGTTATAGGCCATGTCGACTCTGGAAAGTCGACCACCACAGGTCACTTGATCTACAAACTTGGTGGTATTGACAAGCGTGTTATTGAAAGGTTTGAGAAGGAGGCTGCTGAGATGAACAAGAGGTCGTTCAAGTATGCTTGGGTGCTTGACAAGCTCAAGGCTGAGCGTGAACGTGGTATTACCATTGATATTGCCTTGTGGAAGTTTGAAACCACCAGGTACTACTGCACAGTCATTGATGCCCCTGGACATCGTGACTTTATCAAGAACATGATTACTGGTACCTCACAGGCTGACTGTGCTGTCCTCATCATTGACTCCACCACTGGTGGTTTTGAAGCTGGTATCTCTAAAGATGGTCAGACCCGTGAGCATGCTTTACTTGCTTTCACCCTTGGTGTCAAACAAATGATTTGCTGTTGTAACAAGATGGATGCCACCACCCCAAAATACTCTAAAGCAAGGTACGAAGAAATTGTGAAGGAAGTTTCTTCATACTTGAAGAAGGTTGGATACAACCCAGAAAAAATTGCTTTTGTCCCCATCTCCGGTTTCGAGGGAGACAACATGATTGAGAGGTCCACAAACCTTGACTGGTACAAGGGCCCAACGCTCCTCGAGGCCCTTGACTTGATTAATGAACCCAAGAGGCCCTCTGACAAGCCCCTCCGTCTCCCACTTCAGGATGTGTACAAGATTGGTGGTATTGGAACTGTGCCAGTGGGAAGAGTCGAGACTGGTACTCTCAAGCCAG
>HS076501|Panax ginseng||KYERRC001_06-A11-T3.ab1 Panax ginseng in vitro-cultured adventitious root cDNA library Panax ginseng cDNA, mRNA sequence.
GCACGAGGCGCTTTCAGAGGCGAAAGGCCATGGGGAGATACCGTCTGTGATCCATGGATCTCCGATCGGGAAACCGTATCCAAGCTCCGTGGCTAGTCTGCGCTCTTTGGACTTTTCAAACTTAGCGAACTGAAACATCTGAGTAGCTAAAGGAAGGGAAATCAACCGAGACTCCGTTAGTAGCGGCGAGCGAGAGCGGATTGGGGGTTTGAAGAAAAACAAACACGAAGCTTCGTTCCGATCCTTTCTATTCTAGTCGAGTTACTACGTTCCTCAGCAAAGTGTTCACTTCTTTTTTTGCCAGGTTTCATTCGATTTTTTTTTGATTGGATGATGGAAAAACCAGCAAGCTACGGCTTCAAAGCTGACCTTATTATTATGAAAAGGAGAAAGGGCTTTTTATAGAGAGAGGTTGAGTAAGGGGGGCGGAGCTTGAAGAGCGAAGCGAGCCGCGCTAGCCTATTACGTTTTTCAGCAGCAAGCTACGGTCTAACGACCCCCTAACCTAGGTTGGGGCGAAAACTCCAAAACTCGGGTTCCGATCCTATATATTCTAGTCCCGTTCCAAACCTTTCTCTAATAAGAAGGTCCGCTTTCAAGCCCCTTGACTTTCTATTCTATTAGTCAAGGGCGCAGTGAACTGTAATTGTGAAAAGGTTGGAAGATCTGGCCAAAGAAGGTGATAGCCCTGTAGATTCGTTCCCATGGTTCGATCCTTCCCAGTAAAACGCGGCGTGTTCGAATTCTGATCGCTTTTACGCGAGAAAGGGGGACCACCCTCTAAGCCTAAGTATTCCTCAATGACCGATAGCGTACAAGTACCGTGAGGGAAAGGTGAAAAGAACCCTATTTAGGGAGTGCAATAGAGAACCTGAGATCCGATG
>HS076477|Panax ginseng||KYERRC001_05-G07-T3.ab1 Panax ginseng in vitro-cultured adventitious root cDNA library Panax ginseng cDNA, mRNA sequence.
GCACGAGGCTACCGTTTCTCGTTTGATAAGCTTTTCGGTTGAACTATGGGTAAGGAAAAGTTTCACATTAACATTGTGGTTATAGGCCATGTCGACTCTGGAAAGTCTACCACCACAGGTCACTTGATCTACAAGCTTGGTGGTATTGACAAGCGTGTTATTGAAAGGTTTGAGAAGGAGGCTGCTGAAATGAACAAGAGGTCGTTCAAGTATGCCTGGGTGCTTGACAAGCTCAAGGCTGAGCGTGAACGTGGTATTACCATTGATATTGCCTTGTGGAAGTTTGAAACCACCAGGTACTACTGCACGGTCATTGATGCCCCTGGACATCGTGACTTTATCAAGAACATGATTACTGGTACCTCACAGGCTGACTGTGCCGTCCTCATCATTGACTCCACCACTGGTGGTTTTGAAGCTGGTATCTCTAAAGATGGTCAGACCCGTGAGCATGCTTTGCTTGCTTTCACCCTTGGTGTCAAACAAATGATTTGCTGTTGTAACAAGATGGATGCTACCACCCCAAAATACTCTAAAGCAAGGTACGAAGAAATTGTGAAGGAAGTTTCTTCATACTTGAAGAAGGTTGGATACAACCCAGATAAAATTGCTTTTGTCCCCATCTCCGGATTCGAGGGAGACAACATGATTGAGAGGTCCACAAACCTTGACTGGTACAAGGGCCCAACACTCCTCGAGGCCCTTGACTTGATTAATGAACCCAAGAGGCCCTCTGACAAGCCCCTCCGTCTCCCACTTCAGGATGTGTACAAGATTGGTGGTATTGGAACTGTGCCAGTGGGAAGAGTTGAGACTGGTACTCTCAAGCCAGGAATGGTCGTTACCTTT
>HS076475|Panax ginseng||KYERRC001_05-G05-T3.ab1 Panax ginseng in vitro-cultured adventitious root cDNA library Panax ginseng cDNA, mRNA sequence.
GCACGAGGGAGCAATTCAAAATGGTTATGCCAGGTGACCGTGTGAAGATGGTTGTTGAACTTCATGTTCCTGTTGCTTGTGAGCAAGGGATGAGGTTTGCTATCAGAGAAGGAGGGAAGACTGTTGGAGCTGGTGTTATTAATGCCATTATTGAGTGATAAGTCTTCCTCAGGTGATCGACGCATTTGGGTGTATCAAAGTTTAAGTCTTTAGCTTTTATGAAATTAGTTTTACCTCTTTATTTATTAAACATGTTGAACCCAATGTCATATATGCTGCAATCATTTTGTTGCTTCTCTTATATATTTTTGTGTCTTACTTTAGTTGAACAATATTCTTCTGTCGATGATTCAATGTATTTTACTTTCTCCCGGTTATGTCTGCCTTCTTGACATTGGCTAGCTACATTTGGTCAAAATCTATGCGAGCTTGCGAACCATGCAACATTAGTTTTGGCCCTTTATGAACTTTTAGATATAAACAGGAAGAAAGTTGCTTAGTTTCATCACCGGATCCGTCATCAGTGGTATCTGCAACACAATCTCAAGCACCAACTTTTTATTACTTTGTAGCACAATTGCATTATCTATTCTTATTTCCTTCTTATGGGTCTCAAAGCGCATCAATTTGTTATATTTGGACTCATTGTTTTCTTATGTATGAAATTTTTAGGATTTTACCAGTTGATATCAGGTAGCTAATGCAGGTACTTGATTTAGGAATCATGGTCACCCGGTGACTAGTAGAATTAACTGATTATTGAAAAACAATG
>HS076465|Panax ginseng||KYERRC001_05-F04-T3.ab1 Panax ginseng in vitro-cultured adventitious root cDNA library Panax ginseng cDNA, mRNA sequence.
GCACGAGGGGGCTATTTTATGATGTTTTGTTAATCTTCACAATTTATTTGTGAATCACTTTGATCTTAAGTTGACTTATTCGTTGTGGTAATTACAGGGTTTGTGAAAATATTCCCATTGTTCTTTATGGAAACAAGGTTGATGGGAAGAACAGGCAGGTTAAGGCAAAGCAGGTTACATTCCACAGGAAGAAAAACTTGCAGTACTATGAGATTTTGGCAAAAAGCAACTACAATTTTGAGAAACCATTCTTGTACCTTTCCAGGAAGCTCGCTGGGGATGCAAATCTTCATTTTGTTGAGTCACCTGCACTTGCTCCTCCGGAAGTTCAGATTGACATGGTTGCACAGCAACAGAACAAATGAGAAAACACTGATGAGTTGCTGTAAATAAGTTTGTTGGAGTTCGCTTTTATAAGCCATGGGCTGCACTGTGCTACGCTGCTGTAGCTGTTTTGATGATCTCTCGGTGCTTAGCTATCCATTCTCAAGTTCATTCTTTGGTCTCTCCGATGAGGAAACTAGAGATGTTGAACTCATCCAGAATCTTCTAGCTTCTGCTGAGAAAGTAGGGGAGCAGCAGTTTGAATGTGCAAACAAGCTCCTCAACTATTGTCATGAGTACTCTTCCAAAAAAGGAAGCCATGTTCAAAGACTGGTGTACTATTTCTTCGAGGCTCTTTGACACANGATTGAATAACAAACCGGAAAGAGGACATTAAAGGATTTGAGAAAAATGCAGTCACTTGCGTTGATGGACCCAAGCCCGAATACCCTTGCATTTTACCATCAGTGCCTCACGTTGGTGGATTATTATGCTCCTCTTT
>HS076462|Panax ginseng||KYERRC001_05-E12-T3.ab1 Panax ginseng in vitro-cultured adventitious root cDNA library Panax ginseng cDNA, mRNA sequence.
GCACGAGGCAGCGATTCTTATCTTAGTCAATTCATATCCCCATTTCCCCTGCCAACATTCCGGTCGGAGTTTCTTCTATTGGGGTTCCCTGGATGGCGGTGATCCAAAAAGGGCCGACAGTGTTTGACGAGGAGACAGCGAACAATGCTGACATGGGAGATCTTAATACAGAGGTTTCTGAGTCCGAATCAGAATCTGAAGAAGATGATGGAGATGTAAAGCTAACTGAACCTTCAAAGAATGCAATATACAACAGGGATGGCCTACTTGATAAACTTGGAGATATCAGCTGGCCTGAGAATGTGGAATGGATACAAAAGCTTTCCATTGATATTAGTCAAGAGCAAGAGGTGGACGTGAATGATGATCTGACAAGAGAACTTGCTTTTTATACTCAGGCACTGGAGGCCACAAGAGAAGCTTTTGTAAAGTTTGAATCAATGAAACTTCCTTTCTTAAGGCCTTCTGACTATTATGCTGAGATGGTGAAAACTGATACTCACATGGTAAAAGTTAAGGGACGGCTTTTGGCAGAAAAAAAAAGGATTGAGGAGGCTGAGGAGAGAAGGAAGGCTAGGAACAACAAGAAAATTGCTAAGGAAGTACAGGCTCAGAAACTTAAAGAGAGGGCTAAGCAGAAAAAGGATGAGATAGAATCTGTTAAGAAGTGGAGGAAACAGAGGCAGCAGAGTGGGTTCTCTG
>HS076460|Panax ginseng||KYERRC001_05-E10-T3.ab1 Panax ginseng in vitro-cultured adventitious root cDNA library Panax ginseng cDNA, mRNA sequence.
GCACGAGGGTACCAATATGGATGCTACCACCCCAAAATACTCTAAAGCAAGGTACGAATAAATTGTGAAGGAAGTTTCTTCATACTTGAAGAAGGTTGGATACAACCCAGATAAAATTGCTTTTGTCCCCATCTCCGGATTCGAGGGAGACAACATGATTGAGAGGTCCACAAACCTTGACTGGTACAAGGGCCCAACACTCCTCGAGGCCCTTGACTTGATTAATGAACCCAAGAGGCCCTCTGACAAGCCCCTCCGTCTCCCACTTCAGGATGTGTACAAGATTGGTGGTATTGGAACTGTGCCAGTGGGAAGAGTTGAGACTGGTACTCTCAAGCCAGGAATGGTCGTTACCTTTGGCCCTACTGGTCTCACAACTGAAGTTAAGTCTGTTGAGATGCACCACGAGTCGCTTGTTGAGGCTTTACCTGGTGACAATGTTGGCTTCAATGTCAAGAATGTTGCTGTGAAGGATCTCAAACGTGGGTATGTTGCTTCCAACTCCAAGGATGACCCTGCCAAGGGAGCTGCCAACTTCACATCTCAGGTCATCATTATGAACCACCCTGGCCAGATTGGAAATGGTTATGCCCCAGTCCTTGATTGTCACACCTCCCACATTGCTGTTAAGTTTGCTGAGCTTTTGACCAAGATTGACAGGCGGTCTGGTAAGGAGATTGAGAAAGAGCCCAAGTTCTTGAAGAATGGTGATGCTGGAATGGTTAAGATGCTTCCAACGAAGCCCATGGTGGTGGAGACTTTCTCTGAGTACTCTCCTCTTGGAAGGTTTGCTGTTCGTGACATGAGAACAACAGTTGCAGTTGGAGTCATCAAG
>HS076455|Panax ginseng||KYERRC001_05-E05-T3.ab1 Panax ginseng in vitro-cultured adventitious root cDNA library Panax ginseng cDNA, mRNA sequence.
GCACGAGGTGGCCTGTTGGTCATCCGTGCATATCATATGGCAAGAGGAGATCATCATCGTAATGTATGTATTATACCAGTGTCTGCACATGGCACTAATCCTGCTAGTGCTGCTATGTGTGGAATGAAAATTGTGACTATTGGAACTGATGCCAAGGGAAACATCAATATTGAAGAGTTACGAAAGGCGGCTGAAATGAACAAGGACAATCTATCTGCCCTTATGGTCACATATCCTTCTACTCATGGAGTTTATGAGGAAGGTATTGATGAGATATGTAAGATTATTCACAACAATGGAGGTCAAGTTTACATGGATGGAGCCAACATGAATGCGCAGGTTGGTCTAACAAGTCCAGGCTGGATTGGAGCTGATGTTTGTCATCTGAATCTCCATAAAACATTTTGCATTCCACATGGTGGAGGTGGTCCTGGCATGGGTCCTATTGGTGTAAAGAAACACTTGGCACCATATCTTCCATCACACCCAGTGATCTCTACAGGAGGTATACCTGCCCCTGACAAGGCTCAGCCACTTGGTACCATTTCTGCAGCGCCTTGGGGTTCTGCTCTTATTTTACCAATATCATACACATACATTGCTATGATGGGGTCTGGAGGGCTAACAGATGCATCAAAGATAGCCATCTTGAACGCAAACTACATGGCAAAACGTTTAGAGAACCACTACCCCGTTCTTTTCCGTGGTGTCAATGGAACAGTTGCCCATGAATTTATTGTTGATTTGAGGGGATTCAAGAATACTGCTGGTATAGAGCCTGA
>HS076433|Panax ginseng||KYERRC001_05-C06-T3.ab1 Panax ginseng in vitro-cultured adventitious root cDNA library Panax ginseng cDNA, mRNA sequence.
GCACGAGGCCATCCCTTGCTTCAAGGAGGAGGAGAGTACCAAGTTCTAACCATATTTATAGGCACTTTCTCTCTCTTTAAGGAATGGATACATTCTTGTTCACATCTGAGTCCGTCAATGAGGGACATCCAGACAAACTTTGCGACCAGATCTCAGATGCAGTCCTTGATGCCTGCCTAGCACAGGACCCTGAGAGCAAGGTTGCCTGTGAGACCTGCACCAAGACCAACATGGTCATGGTCTTTGGAGAAATCACCACCAAGGCTGATGTAGATTATGAGAAAATTGTGCGTGACACTTGCCGTGCAATTGGATTTGTATCTGATGATGTGGGTTTGGATGCCGACAACTGCAAGGTCCTTGTCAAGATTGAGCAACAGAGCCCTGATATTGCCCAAGGTGTCCACGGTAATCTGACCAAGAGACCTGAGGAGATTGGTGCTGGTGACCAAGGTCATATGTTTGGTTATGCAACTGATGAGACCCCTGAGCTGATGCCCCTCAGCCATGTTCTTGCTACCAAGCTTGGAGCTCGCCTAACTGAAGTCCGCAAGAATGGTACTTGTGCCTGGCTAAGGCCTGATGGTAAAACCCAAGTGACTGTTGAGTACCAGAACGACAATGGTGCCATGGTCCCCATTCGTGTGCACACTATTCTGATCTCCACCCAGCATGATGAGACTGTTACAAATGATGAGATTGCTGCTGATCTTAAGGAGCATGTCATCAAGCCTGTTGTTCCTGAGAATTATCTGGATGAAAAGACCATTTTCCACTTGAACCCATCTGGCCGCTTTGTCATTGGTGGACTCATGGTGATGCTGGTCTAACTGGCCGCAAGATCATTATCGACACTTATGG
>HS076388|Panax ginseng||KYERRC001_04-F08-T3.ab1 Panax ginseng in vitro-cultured adventitious root cDNA library Panax ginseng cDNA, mRNA sequence.
GCACGAGGAGAACGCTCAGATCTGCTGCTTACACAACCTATACTCCGCCGCTGCTAAATTTCTCTCTCCGCTTTAGAGTATGGAGACCTTCCTATTTACCTCTGAATCTGTTAACGAGGGTCACCCAGACAAGCTTTGTGATCAGATCTCCGATGCTGTGCTTGATGCCTGCCTTGCCCAGGACCCCGACAGCAAGGTCGCCTGTGAGACTTGCACCAAGACCAACATGGTCATGGTCTTTGGGGAGATTACTACCAAGGCCGATGTAGACTACGAAAAGATTGTCCGTGAGACATGCCGTACCATTGGATTTGTTTCTGATGATGTGGGTCTTGATGCCGACAACTGCAAGGTCCTTGTAAACATTGAGCAGCAGAGCCCGGATATTGCCCAGGGTGTCCACGGCCACCTTACAAAGCGCCCAGAGGAGATCGGTGCAGGTGACCAGGGCCATATGTTTGGCTATGCCACTGATGAAACCCCTGAACTTATGCCTCTGAGCCACGTCCTTGCAACCAAACTTGGGGCTCGCCTGACTGAGGTTCGAAAGAACGGTACCTGCGCCTGGCTGAGACCTGATGGTAAGACTCAAGTCACTGTTGAGTATTATAACGAGAATGGTGCGATGGTTCCAATTCGTGTTCATACTGTCCTTATCTCCACCCAACACGATGAGACTGTCACGAATGATGAAATTGCTGCCGACCTCAAGGAGCATGTCATTAAGCCTGTGATCCCCGAGAAGTACCTTGATGAGAACACCATCTTCCACCTTAACCCTTCANGCCGCTTTGTCATTGGCGGCCCTCATGGTGATGCTGGTCTCACCGGGCGCAAGATCATTATTGACACTTATGGTGGGTGGGGAGCCCAT
>HS076369|Panax ginseng||KYERRC001_04-D07-T3.ab1 Panax ginseng in vitro-cultured adventitious root cDNA library Panax ginseng cDNA, mRNA sequence.
GCACGAGGCTCTCTATATATAAGCTCCTCTCTCGGTGCTAGGGTTTTGAGTTTGAAATTCGTTGCGCTGCTACTTGCTTCATTATGGGTAAGGAGAAGGTTCACATCAACATTGTGGTCATTGGCCATGTGGATTCTGGAAAGTCAACCACCACTGGTCATCTCATCTATAAGCTGGGAGGTATTGACAAAAGGGTGATTGAGAGGTTTGAGAAGGAAGCTGCTGAAATGAACAAGCGTTCATTCAAGTATGCCTGGGTTCTTGACAAGCTCAAGGCTGAGCGTGAGCGCGGTATCACCATTGATATTGCTCTGTGGAAGTTTGAGACCACCAAGTACTACTGCACTGTCATTGATGCCCCTGGACATCGTGATTTCATCAAGAATATGATTACTGGAACTTCCCAGGCAGACTGTGCTGTGCTTATCATTGACTCCACCACTGGAGGTTTTGAAGCTGGTATCTCAAAGGATGGGCAGACCCGTGAACATGCCTTGCTTGCTTTCACACTTGGTGTCAAGCAGATGATCTGTTGCTGCAATAAGATGGATACCACAACTCCCAAGTACTCCAAGGGTAGGTACGAAGAAATTGTGAAGGAGGTGTCATCCTATTTGAAGAAGGTGGGATACAACCCTGATAAGATTGCCTTTATTCCCATCTCTGGGTTTGAAGGCGATAACATGATTGAGAGGTCTACAAACCTTGACTGGTACAAGGGTCCTACCCTACTTGAAGCCCTTGACCAGATCACTGAGCCCAAGAGGCCCTCAGACAAGCCCCTTCGTCTCCCTCTCCAGGATGTGTACAAGATCGGTGGTATTGGAACCGTGCCAGTGGGACGTGTTGAAACTGGTACCATCAAGCCTGGGATGGTTGTGACTTTCGGCCCATCTGGCTTGACCA
>HS076360|Panax ginseng||KYERRC001_04-C08-T3.ab1 Panax ginseng in vitro-cultured adventitious root cDNA library Panax ginseng cDNA, mRNA sequence.
GCACGAGGGATTCCATCTTCGTCCCCTCAACGGCTCAACCTATATCTCTCTCATCTAATGATTTGTAAGGTCAATCTGCTATAACATTTATTAGCCAAAGTGGAGACTTGCAAGTTAGAAGTATCTTTTATGTCTGAACGGGCCTCCCTGTTTTTGTCATCGTTTGGGTTGCTCGGTGAGTATTGTCCTTCATCAAGAAAAAAGGATAAAGTTGGCTGCATGCATCTTGAGGCACTTCTTCAGGGCTATAACAAACACAGTGAGGGTTGCCAGCTCATGCGACCTTTTCTTGCCACAAATCTACCCATTGTCAAAGAAGAAACCTTTTTTAAAGCAGAAACCTTTTACGTTCTCTGATATAGTTGTATCTGAGAAGCAAAGATGGCTTTGCAAAATATTGGTGCCGGCAACAAGGATGACGCCTTTTATAGGTACAAGATGCCCAAAATGATGACAAAAATTGAAGGTCGGGGAAACGGCATCAAGACAAATATTGTCAACATGGTTGATATTGCTAAAGCCTTGAGCAGGCCTGCTGCTTATACCACAAAGTATTTCGGTTGTGAGCTTGGTGCCCAGTCCAAATTTGATGAGAAGACTGGAACATCACATGTTAATGGCTCCCATGACACTGCAAAACTCGCTGGCCTTCTCGAAAACTTCATCAAGAAATATGTTCAGTGCTATGGATGTGGGAATCCTGAAACTGAGATAATAATTACCAAGACACAGATGATTACCTTAAAATGCGCTGCATGTGGGTTTTTGTCTGATGTTGATATGAGGGACAAGCTCACAACCTTCATCATCAAGAACCCTCCTG
>HS076347|Panax ginseng||KYERRC001_04-B05-T3.ab1 Panax ginseng in vitro-cultured adventitious root cDNA library Panax ginseng cDNA, mRNA sequence.
GCACGAGGTCCCCTTTTCATCTAGTCCCAATTTTCCGGCAGATTTGGAGTACCAGCCCGGATTCGGTAACCACTTCTCGTCGGAGGCGATCGCCGGAGCTCTCCCAAAGGGTCAGAACAGCCCTCTTGTTTGTCCATTTGGTCTATACGCCGAGCAAATCTCCGGCACCTCGTTTACCGCTCCTCGCAAGATCAATCAGCGAAGTTGGTTGTACCGGATCAAGCCATCGGTTACTCATGAACCGTTTAAACCTAGAGTTCCGAATCACGGGAAGCTTGTGAGTGAATTTAATCAATCCAACAGTTCTGCTACTCCAACTCAACTGCGGTGGAAACCTGTTGAGATTCCCGATGCACCCACTGATTTTATTGATGGAATGTACACTGTTTGTGGAGCTGGCAGCTCATATCTTCGACATGGTTATGCAATTCACATGTACACTGCCAACAAATCAATGGACAATTGTGCCTTCTGCAATGCTGATGGTGATTTTCTGATAGTGCCTCAAAAAGGAAAGCTGTGGATCACTACTGAATGCGGAAGTCTGCAAGTGTCTCCTGGTGAAGTAGTTGTTTTGCCTCAAGGATTCCGTTTTGCTGTTAACCTGCCAGATGGTCCATCACGTGGTTATGTTTCTGAGGTTTTTGGTACCCATTTTCAGCTTCCCGACCTTGGTCCAATAGGTGCTAATGGTCTTGCTGATCCCAGGGATTTCCTTGTTCCCACAGCTTGGTTTGAAGAGAGAGTTCGTCCAGGTTTCACCATTGTACAAAAGTATGGTGGCGAGCTCTTTACTGCAAAACAAGATTTCTCTCCATTCAATGTGGTTGCTTGGCATGGTAAATATGTTCCTTTATAGTATGACCTAAGTAAAGTCTGCCCTTATAATACTGTCTTGGTGGATCACGGAGATCCGT
>HS076309|Panax ginseng||KYERRC001_03-F06-T3.ab1 Panax ginseng in vitro-cultured adventitious root cDNA library Panax ginseng cDNA, mRNA sequence.
GCACGAGGACACCGTTTGCCATGGATCTATCATTAATTCATCTCAGCCCCCCCATCATCATCATCATGTCGGATCAGCTCCATCTGGAATTCCTTTTGAAAGGCACTTTAATCATTATCAGGAGTCCTCAGATACGTTATTCAGGAGTCCTCCTGCTTTTGGAGGAATGGGTTTAGGTCACAATGACAGGAGTTTTATGGGTCCTCGTGGTTCTGTGAATACAGTCTTTCCAGAAAATGGTTCCCCAAGTTTCAGCATGATGTCTTCCCCAAGGCTGAGTCCTATGTTCCATGGAAATGGCCATTACCCAGGACTGGCACCCATCAACATGGATGGTTTTACTGAGCGTGGAAGGAGCCGACGTGTTGAGCACAGTGCAAGTCAAATAGATAACAAGAAGCAGTTTCAACTTGATCTGGACAAAATTTTAAATGGGGAGGATTCAAGGACAACTTTAATGATTAAAAATATCCCTAATAAGTACACCTCAAAGATGTTGTTGGCTGCCATTGACGAAAATCACAGGGGTACTTATGATTTTCTCTATCTGCCAATTGATTTTAAGAATAAATGCAACGTTGGCTATGCGTTTATCAACATGCTGTCTCCATCGCATATTATCCCATTCTACCAGGCATTTAATGGGAAGAAGTGGGAGAAGTTCAATAGTGAGAAAGTTGCTTCATTGGCATATGCTCGAATCCAGGGAAAGATGGCCCTTGTCACCCACTTCCAGAATTCAAGCTTGATGAATGAAG
>HS076263|Panax ginseng||KYERRC001_03-B04-T3.ab1 Panax ginseng in vitro-cultured adventitious root cDNA library Panax ginseng cDNA, mRNA sequence.
GCACGAGGCTCCCTTTTCGTGAAACTATTCCTCAAGCAAGGCAGCTGATAAGTCATCGTAGGGTTTGTGTGAATAATGGAATGGTAAGCATTACTCATTTTAAAGTTTCCCACGGTGATATAATATCTTTTAAAGAAAATGATGCGAGAGCCCGCGGTGAAGAAATAAGGAGATCCTTCTATATCGAAATATTTGTTGAAAAAAGAATAGGAAAATTCCGGGATCACCCGGTAAGAATGTGGAGAAGAACCAAAACAGAATGGTTCCGCCTACTCAAAACTAAGAGGGGATGCCGCCTACTACTAAAAGACCGGTTTTTGCAAAAGTTGCGTTCTTCTATGCAAGAAGAAGACTTAGAAGGAACAAAGAAGTTTGGATCCGAAAAAGTATGCTTAGGCAGTTCTTTCGCTGAGCACAACAGAATGAAGAGGAATTTTGATCAATCCCTATTCTTATTGAAGAGAAGGAACGAGAAAAACCTAAATCTTCCTACCCGTCCTATAGTTTACAACTCTTCTTTTTATAGTAATTCGACCTATTGCTCCGCATCCCCCCATCAGTTTACTATGAAGAGAAAAAGAAAAAGGGTCGAACTACCTACTCATTATTCGGAGGTGAATTATAGAACACTAAAAGCTGTGGTATTTTATGGACCTAGCATAGGGCACATCCCTCACGACATAAGATTGAAAGATCTAAACCTTCTTCTTTGGAGCGGAAACGGACGTGGCCAAAACATATAAAGATGAAGAAACTAGGACGTAAAAAAAAGCTCGAAGACAAAAGAGACCCGGGCTTTTCAAAAAAATGCTTGTCGGTTTCCTTATTATAGTTCCTTCTCTTTTGACTTGGCAATTAAAAATGAGCCTTTTTTTTATTTATTATGGGAAAAAATCCCC
>HS076257|Panax ginseng||KYERRC001_03-A10-T3.ab1 Panax ginseng in vitro-cultured adventitious root cDNA library Panax ginseng cDNA, mRNA sequence.
GCACGAGGGCGCGGTTGGGGTTAGGGTTTCAGTTCACAGACGCCAATCGAAGAAAAGATGTGGCACGAAGCAAGGAGGTCAGAGAGGAAGGTCCACGATATGATGGACGCAGCTCGGAAAAGAGCTCAGAGACGGGCCGTGTATCTGGCCAAAAGACGTGGGGACCCGCAGCAATCCATCCAGGTCTCCGGATCTCGTTGCCGCATGTACCGTGATGACGGCCTTATCAAGCCACCCAGGATCAACAAGGCCTGATACCTTGGAATGGGAAACAGGACATCTTGATTGACAGATTTGATGGTCGAGCTCTTCTTGATTTCATTAGAGATTCTGATTCTCGGCGGTTTAGGGTCCGAGAGAAAACAGAGGAGGAAGAAGAACTTGAAGAGTTTGTTAATTTTGAGCGTTATCGGGATTTAATTAAGCATCGACGTAGAGGATGTCGTTATCGACGAGGAGGGGTTGCAACATGTTAATCAAGAGATGGAGGCAAAGCATGTTGCATTATTTGGATTAGACAGATCTCATCCGGCTCAGCCACCACCAGCAGCAAGCAAGGGAGCTTATTCTCAGGTGGGATTCTCGTATGATGGAGATGGAAAACAGGAAACTCATTATTCAGATGACGATGAAAATGATGAAGATGAAGACGAGGATGAGGAAGATGATGAGGAATTTAATAGTGATGATAGCAATGATGAAGGAATGGATTTAATAGCAAAAGAGTTTGGGGTGAAGAGGTATGGGTGGCTTGTATACATGGATAAAAAGGCTAAAGAAGAAGAAAGGAGGCAAAAAGAAGTAGTCAAGGGAGATCCTGCAATTAGGAAGCTGAGTCGCAA
>HS076226|Panax ginseng||KYERRC001_02-G02-T3.ab1 Panax ginseng in vitro-cultured adventitious root cDNA library Panax ginseng cDNA, mRNA sequence.
TCTTAAGCAGGGCTTGGCCTTTTAGTGCTGATCGAATTATAGTCACTGGTGGATCGCTTGACCTATCGAAGGAAGCTCTTGCTATTGCAGAAACAGATGCAAGACTTTTTTGCACGGTCGGTGTGCACCCAACAAGATGCAATGAATTTGATGAGAGTGGGGATCCAGAAAAACATTTTCAGGCACTGTTGTCATTGGCTAAAGAGGGTGTTGAGAAAGGAAAGGTGGTAGCAATTGGTGAATGTGGATTGGACTATGACAGAATTCACTTTTGCCCATGTGAGATTCAAAAAAAGTACTTTGAAAAGCAGTTTGAATTAGCAATTGCCATGAAGCTGCCAATGTTTTTACACATGCGAGCAGCTGCCAAGGATTTCTGTCACATTCTTGAGCAAAATAAGGAGAGGTTCTCTGCTGGTGTTGCCCACTCATTTACCGGTAGTGCAGAAGATCGTGATAGGCTTCTTTCATTTAGTAATGTTTTCATAGGTGTAAATGGTTGTTCGCTAAAGACTCCTGAAAATCTTGATGTTGTAAGGAGCATTCCTGTTGAAAGAATGATGATTGAGACAGATTCTCCATATTGTGAGATCAAGAATAGTCATGCTGGGATTAGCTTTGTGAAATCTTTGTGGCCTTCTAAGAAGAAAGAGAAGTATGATC
>HS076196|Panax ginseng||KYERRC001_02-D07-T3.ab1 Panax ginseng in vitro-cultured adventitious root cDNA library Panax ginseng cDNA, mRNA sequence.
GCACGAGGCGCACAGTTTCCCACGTCTTGTTGGCCTGTCGAAGTCCCTCGAAATGATGTTGACATCAAAACCAGTTAAAGGGGAAGAAGCTCTTAGTTTGGGCCTTGTGGACGCGATAGCCTCACCAGCTGAATTAGTAAACATGGCTCGTCGTTGGGCCCTGGATATATTGGAGCGCCGAAGACCATGGGTTGCTAGTCTTTACAAAACTGACAAGTTAGAGCCTCTTGGCGATGCGAGGGAAATACTAAACTTTGCTAGAGCTCAGGCCCGTAAACAGGCTCCAAATCTTAGGCATCCATTAGTTTGTATTGACGTTATTGAAGAGGGTATAGTTTCTGGTCCTCGTGCTGGGCTCTGGAAGGAAGCTGAAGCATTCCAAGGTCTTCTACATTCAGACACTTGCAAGAGTTTGGTCCACATCTTCTTTGCTCAACGTGGTACCACAAAGGTTCCAGGGGTAACTGATCGAGGATTGGTACCAAGACGCATAAATAAGGTTGCTATTCTTGGAGGAGGGTTGATGGGCTCTGGGATAGCAACAACATTGATTCTTAGTAATTATCCTGTGATCTTAAAAGAAGTAAACGATAATTTCTTACAGGCTGGGATAGGTAGAGTCAAAGCCAATTTGCAAAGTCGTGTCAAGAAAGGGAGAATGACTCAAGAGAAGTATGAAAAAACTCTCTCTCTCCTCAAGGGGGCTCTTGACTATGAAAGCTTTAGAGATGTGGACATGGTTATAGAGGCTGTTATAGAGAATGTTTCATTAAAGCAACAAATATTTGCGGATCTTGAAAATATTGCCCACCACATTGCATTCTTGCAAGTAACACCTCCACAATTGACTTGAACCCT
>HS076120|Panax ginseng||KYERRC001_01-E11-T3.ab1 Panax ginseng in vitro-cultured adventitious root cDNA library Panax ginseng cDNA, mRNA sequence.
GCACGAGGTTTCCCTTTCTCTAGGTCGGCGAGCGAGAGAAACTATCTACAGTTTCTCGTTTGATAAGCTTTTCGGTTGAACTATGGGTAAGGAAAAGTTTCACATTAACATTGTGGTTATAGGCCATGTCGACTCTGGAAAGTCTACCACCACAGGTCACTTGATCTACAAGCTTGGTGGTATTGACAAGCGTGTTATTGAAAGGTTTGAGAAGGAGGCTGCTGAAATGAACAAGAGGTCGTTCAAGTATGCCTGGGTGCTTGACAAGCTCAAGGCTGAGCGTGAACGTGGTATTACCATTGATATTGCCTTGTGGAAGTTTGAAACCACCAGGTACTACTGCACGGTCATTGATGCCCCTGGACATCGTGACTTTATCAAGAACATGATTACTGGTACCTCACAGGCTGACTGTGCCGTCCTCATCATTGACTCCACCACTGGTGGTTTTGAAGCTGGTATCTCTAAAGATGGTCAGACCCGTGAGCATGCTTTGCTTGCTTTCACCCTTGGTGTCAAACAAATGATTTGCTGTTGTAACAAGATGGATGCTACCACCCCAAAATACTCTAAAGCAAGGTACGAAGAAATTGTGAAGGAAGTTTCTTCATACTTGAAGAAGGTTGGATACAACCCAGATAAAATTGCTTTTGTCCCCATCTCCGGATTCGAGGGAGACAACATGATTGAGAGGTCCACAAACCTTGACTGGTACAAGGGCCCAACACTCCTCGAGGCCCTTGACTTGATTAATGAACCCAAGAGGCCCTCTGACAAGCCCCTCCGTCTCCCACTTCAGGATGTGTACAAGATTGGTGGTATTGGAACTGTGCCAGTGGGAAGAGTTGAGACTGGTACTCTCAAGC
>HS076115|Panax ginseng||KYERRC001_01-E06-T3.ab1 Panax ginseng in vitro-cultured adventitious root cDNA library Panax ginseng cDNA, mRNA sequence.
GCACGAGGGTTGCATTTATCAAGCCGTTAAATGAAGTGATTATAAAAGCGAATGCGCTGACAGAAGGGAGACGATCCAATTTCTTTAATCACTTGAAGACTGTTGCGGACAGTATATCAGCGCTTGCATGGATTGCATATACCGGGAAAGACTGCGGGATGAGCATGCCTATTGCCCATGTGGAAGAAAGTTGGCAAATGGCTGAATTTTACAACAACAAGGTTCTCGTAGAGTATAGAAATAAAGACCCAAATCATATTGAGTGGGCAAAAGCTTTGAAGGAGCTCTATGTTCCAGGCTTGAGGGATTATGTGAAGGCTCACTATCCGTTGGGTCCTGTATGGAGTGCAACAGGGAAAGCTATTGTGTCTGCTCCATCAAAAGCTCCTACAGCAAACGCTCCTGCTCCTCCACCTCCTCCGCCAGCCTCGCTCTTCAGTTCAGAAACTCCTCAGCCTTCATCATCTCGCCCAAAGGCGGGAATGGCTGCTGTTTTTCAAGAAATTAGTTCAGGGAAGCCAGTGACTTCTGGTTTGAAAAAGGTCACAGCCGACATGAAGACAAAGAACCGTGCAGATAGAGCTGGCATTGTTACTGCTAATGAAAAAGATGGTCGTGGCCATTCGTTTTCTTTCTCCAAAACTGCACCTCCCAAGTTAGAGCTTCAAATGGGTCGCAAGTGGGTGGTTGAATACCAAATTGGAAAGAAGATTTTAGTAATTGATGACTGTGATGCGAAGCAAACTGTATATGTTTTTGG
>HS076092|Panax ginseng||KYERRC001_01-C07-T3.ab1 Panax ginseng in vitro-cultured adventitious root cDNA library Panax ginseng cDNA, mRNA sequence.
GCACGAGGCTTTCACTTCCGCCGGTATCGCCTCCATTTTTCTCTAGACAATTCAATCCACTCTCTCTCCTCCATTCTTCTCCGTTCATCTCTACAACCTACAGATATTTTTAGAGCAACTACTAGAAGATTTCTTCCTACATCTAAGGCAAAGCCCATCTCAAGCATGGCAACCGATGAAGAACATGTGGGTAGTCTTAAGCAACAATTAGCAAAGCTATTTGAAGCATCACTCAAAATAACAGTCCCTGATGAGTCGGATGTAGAACCTTTGATTGCTGCTTGTAATAAGCCAGGATTTGGTGATTACCAATGCAACAATGCCATGAGCTTATGGACAAAAATAAAAGGGAAGGGTACTGAATTTAGAGGTCCTCAACCTGTTGGACAGGCTCTTAAGAACAATCTTCCTGCATCAGAAATGGTAGAGTCATGCAGTATAGCTGGAGCTGGCTTTGTGAATATTGTATTGTCGAAGAAATGGATGGCGAAGAGCATCCACAAGATGCTAATGGATGGTATTGGAACAATGGCACCAAAGCTTCCTGTTCGAAGGGCAGTGGTTGACTTTTCCTCACCTAACATAGCAAAAGAAATGCATGTTGGTCATCTAAGATCTACTATAATAGGAGATACTCTAGCCCGTATGCTTGAGTTTTCAAAAGTTGAAGTACTTCGAAGAAATCATGTTGGTGATTGGGGCACACAGTTTGGTATGTTAATTGAATTCCTATTTGAAAAGTTTCCAGACTGGGAAAATGCTAATGATCAAAGCATCGGTGATCTCGAGGCATTCTATAAAGCCTCAAAGCAGAGATTTGACAGCGATCCTGCTTTCAAGGAGAGA
>GR871174|Panax quinquefolius||Pq_F_00517 American ginseng Flower cDNA Library Panax quinquefolius cDNA 5', mRNA sequence.
CTTTTTCTCCGTGCCCCTTTTGCATGCGCTTCGCGCGCCATTGGCGCTTTGCTCTCCTCTTATTCTTCATTGGACGGTTCGGATGGACTTCGCCGTTCTTTCCCAACTAAAATAGAAAAGGCTGTATCACATCGAGATGTCGATTCGTTTTCCGCCCCCAATGAGATGGGGAATTTGTAACCCCCTATTTAGACTTTTGGGCCCTTCATCTTTCTGAATCGAGACCCGGCCCGGCTCGCGTCGTTCCAACAACCGGCGGGGAGCACCTCAGTATACGATCGCGCGCAGTAACTGGGAGTCCTATTACACCTAAGGCCAACTTCAATTCACCAAACCAAGGTTCATCTCGTGTAGTGATTGTGAACTCGTACAAGGATATTGAGTAGACGGTTGATGTATCAGACTCGACCCTATCTTTCGTAGCATGCATTCCCATCCGTGTCGCAACTGATTCGGTAAGCTACGTGTCCGGTGCACGGAGAACTGCCTTCGGTCCCCCAAACTGACTTACTCGTGGCAA
>GR870999|Panax quinquefolius||Pq_F_00342 American ginseng Flower cDNA Library Panax quinquefolius cDNA 5', mRNA sequence.
GCAGAGTTGTTCTCCCCCCCTAGGAAGACGAAGAAGAAGAAGATGACTCTCTCAAACGACCTTGATCTACTTCACCCGCCGGCTGATGTGGAGAAGAGGAAGCACAAGCTCAAGCGTCTCGTCCAAACCCCCAACTCTTTCTTCATGGATGTGAAATGCCAAGGCTGCTTCAGCATAACCACTGTATTTAGCCACTCCCAAACGGTTGTGGTATGCGGCAACTGCCAGACGGTGTTATGCCAGCCAACTGGTGGCCGTGCTAGGCTCACTGAGGGATCCTCTTTTAGGAGAAAGAACGATTGATGGATGCTTCAAATTTGGTCAGTCCATTGAGAGATGAAGCAACTTTTTGTTCTAATGGTTCTTTCATATGTTATTGTGGTAAATCATGGAAGAAGACTTTATCATGATGTCTTAGGATGCTTATTTTGGTTCTTTGTTGGTTGAATTGGTTCTGTTTCGAAGATGAAACTTTTTGCTAGTGTTATGAAGGGAAGTCTGACTTAAA
>GR870835|Panax quinquefolius||Pq_F_00178 American ginseng Flower cDNA Library Panax quinquefolius cDNA 5', mRNA sequence.
ATTCGGAATTCCATAATCCAAACCCTAAGGCCAAGGGTGCTTCGTCTAGCTCTGCCACGAGATCTACAGCTCACAGAGAAATTGACAAAAATGGCTGGAGGTAGAGCAATCCGCCAGCTACTGTGGGCCAGGTTTCAATCTCAATCCACCGCTCCTCCAGTTTTGTCATCCCTTATGGCAAAGAAAGATCAAGAGGGAGCTGCTGGCCTGAAGTCTCTGAGAGCATTTGCACTACTTGGAGCAGGTGTATCCGGGCTTTTGAGTTTTGCAACAATAGCATCTGCTGATGAGGCTGAACATGGTTTAGAGTGTCCAAGCTATCCGTGGCCTCACCAAGGCATTCTCAGTTCATACGACCACGCATCGATTCGTCGTGGTCACCAGGTGTACCAACAAGTCTGTGCATCCTGCCATTCAATGTCCCTAATTTCGTATCGTGACTTAGTGGGTGTGGCATATACGGAGGAGGAAACAAAGGCCATGGCTGCTGAGATTGAG
>GR870806|Panax quinquefolius||Pq_F_00149 American ginseng Flower cDNA Library Panax quinquefolius cDNA 5', mRNA sequence.
ATTCTCTCCCCTTTAGAAGGCGAGCGAGAGAAACTATCTACAGTTTCTCGTTCTTTAAGCTTTTCGGTTGAACTATGGGTAAGGAAAAGTTTCACATTAACATTGTGGTTATAGGCCATGTCGACTCTGGAAAGTCTACCACCACAGGTCACTTGATCTACAAGCTTGGTGGTATTGACAAGCGTGTTATTGAAAGGTTTGAGAAGGAGGCTGCTGAAATGAACAAGAGGTCGTTCAAGTATGCCTGGGTGCTTGACAAGCTCAAGGCTGAGCGTGAACGTGGTATTACCATTGATATTGCCTTGTGGAAGTTTGAAACCACCAGGTACTACTGCACGGTCATTGATGCCCCTGGACATCGTGACTTTATCAAGAACATGATTACTGGTACCTCACAGGCTGACTGTGCCGTCCTCATCATTGACTCCACCACTGGTGGTTTTGAAGCTGGTATCTCTAAAGATGGTCAGACCCGTGAGCATGCTTTGCTTGC
>GR870797|Panax quinquefolius||Pq_F_00140 American ginseng Flower cDNA Library Panax quinquefolius cDNA 5', mRNA sequence.
CTTCGTAAGAGCTGATAAAACAATTAAAATGGAAAAGGAAAATCCACAAGTTATACAAACAAGAAAATGATATAACCACCACCTTGGAAATATATAAAATTATAAAGAATGAATGCTTTTTCCGATTCCTTGATCAAATAGTAATGCTACCTTCAGGCTCTTTCTATACGTCTTTGTGATTGTAATTGCCTTTGTTTTTTGTTTGATGATATCAACCTCCTTTTTTGGAAATATCATTGTTTTTGAGTAACAATGTCTACTGAACCACCATGCCTTTGCATAGCAATAACTGGTTCATTGCATTTGGACCACCGGAATGATGGAGCTGCAGAGCAACGTGTTCCAAGACAGTAGTAACAGTACCTGTGCTGACAAGGAAGAGCTAAAAAGGGTATGGTTGGATTGGCCAAACAGATAGGGCATAAAGTTTCATT
>GR870988|Panax quinquefolius||Pq_F_00331 American ginseng Flower cDNA Library Panax quinquefolius cDNA 5', mRNA sequence.
ATTTTTTTTCCTTTTTTTTAGCTAAAAGGTCTAAATTCTCATTTAAATTTAAAGCCAAAATGTATTAACCATTCAAAATACATCTCAATAATATCATTCGTTTACAATTTCAAATTACTACATCCACAAAATATACCAAATTATCTATAAAATTAAGTTGTGGAGCACTACTTAAGCTGTGGTGCACTACCTAAGCTGTCGATCTTGGTCAAGAGCTCAACAAACTTGACAGCAATGTGAGAGGTGTGGCAATCAAGAACTGGGGCATATCCATTTCCAATCTGTCCAGGGTGGTTCATGATGATGACCTGAGATGTGAAGTTGGCAGCTCCCTTGGCAGGGTCATCCTTGGAGTTGGATGCAACATAACCACGCTTGAGATCCTTGACTCGTTGCACGATATAGTGGCTTATACCACAGAACATATGAAAGTGGGCATCCAAGTAGAGCATAGATAGTTGAAAGAAAGAAAATTTTGACACCACCGCCCTTAATCCAACAAACAATCA
>GR870877|Panax quinquefolius||Pq_F_00220 American ginseng Flower cDNA Library Panax quinquefolius cDNA 5', mRNA sequence.
ATTCGTCCATCTGTGATAAGTGGTGCACCCCTTGAAACTCTTCATCAGACTTCTGCTGAGGTTAATTCTCACCTTTACCAGGTCAAAGCTGTAGCAGAGGAGATGGGAATTGGATTCTTAGGAATTGGCTTCCAACCCAAATGGGGTATTAAAGACATACCTAATATGCCTAAGGGAAGATATGAGATTATGAGGAATTACATGCCTAACGTTGGCTCACTTGGACTTGATATGATGTTCAGGACGTGTACTGTTCAGGTTAATCTGGATTTCAGTTCTGAAGCTGACATGATTAGCAAATTCCGTGCTGGTCTTGCTTTACAGCCTATTGCAACTGCATTGTTTGCCAATTCACCTTTTACAGAAGGAAAGCCAAATGGCTACCTCAGCATGAGAAGCCAAATATGGACAGACACAGATAACAATAGAGCAGGAATGCTTCCCTTTGTGTTTGACGATTCCTTTGGGTTTGAACAGTATGTCGATTATGCTCTTG
>GR870855|Panax quinquefolius||Pq_F_00198 American ginseng Flower cDNA Library Panax quinquefolius cDNA 5', mRNA sequence.
ATTCCTCTCTCCCTTTAAGCGAGCGAGAGAAACTATCTACAGTTTCTCGTTTCATAAGCTTTTCGGTTGAACTATGGGTAAGGAAAAGTTTCACATTAACATTGTGGTTATAGGCCATGTCGACTCTGGAAAGTCTACCACCACAGGTCACTTGATCTACAAGCTTGGTGGTATTGACAAGCGTGTTATTGAAAGGTTTGAGAAGGAGGCTGCTGAAATGAACAAGAGGTCGTTCAAGTATGCCTGGGTGCTTGACAAGCTCAAGGCTGAGCGTGAACGTGGTATTACCATTGATATTGCCTTGTGGAAGTTTGAAACCACCAGGTACTACTGCACGGTCATTGATGCCCCTGGACATCGTGACTTTATCAAGAACATGATTACTGGTACCTCACAGGCTGACTGTGCCGTCCTCATCATTGACTCCACCACTGGTGGTTTTGAAGCTGGTATCTCTAAAGATGGTCAGACCCGTGAGCATGCTTTGCTTGCTTTCACCC
>GR870780|Panax quinquefolius||Pq_F_00123 American ginseng Flower cDNA Library Panax quinquefolius cDNA 5', mRNA sequence.
ATTCTTTTACCCTTTAAAACTAAGCAGCCAAATCAGTACAAATTAATAAAACTCATAAATAGTCTACTATTTATATGATTTGGAAGGTGCTGGAATACATTAAAAAAACTAAAATTAACAAGGGTAAAAAAAATTCAGAAAAAAAAAACAAAAAACAAACAACACCAAAACTTCTGGAGTAAGGGAACTTGGTTTCATCCTTGACCTTGACGCTTTGCATCTCTTTCCCGTCATGAAGGATTGATATACCTCAAGTTCAAAGATCTTACTTGATGTCTTTCTTGGAGACAGACTTCTGTCCACGTTTTCTGGTGGAACTTCTACCTGGGTTGACCGGAGTAGGTCTGGCAGAATTAGAAGACACGTAGTGCCCAGAAACCAAAGCAGGGAACCCAACAGCAGGGATTCCAACAAGAGCACAGCAGACTCCTGCTTGGCCGTGGATGCATCAAATGCCTTACTACTTTGCAAGGAAAGGCGTAGCGCTTGGTTCTCAGC
>GR875088|Panax quinquefolius||Pq_R_02571 American ginseng Root cDNA Library Panax quinquefolius cDNA 5', mRNA sequence.
TGCAGGAATTCGAATTCGAATTCGTCTCTCTCCGCTTTAGAGTATGGAGACCTTCCTATTTACCTCTGAATCTGTTAACGAGGGTCACCCAGACAAGCTTTGTGATCAGATCTCCGATGCGGTGCTTGATGCCTGCCTAGCCCAGGACCCCGACAGCAAGGTCGCCTGTGAGACTTGCACCAAGACCAACATGGTCATGGTCTTTGGGGAGATTACTACCAAGGCCGATGTAGACTACGAAAAGATTGTCCGTGAGACATGCCGTACCATTGGATTTGTTTCTGATGATGTGGGTCTTGACGCTGACAACTGCAAGGTCCTTGTAAACATTGAGCAGCAGAGCCCTGATATTGCCCAGGGTGTCCACGGCCACCTTACAAAGCGCCCAGAGGAGATCGGTGCAGGTGACCAGGGCCATATGTTTGGCTATGCCACTGATGAAAACCCTGAACTTATGCCTCTGAGCCATGTCCTTGCAACCAAACTTGGGGCTCGCCTGACT
>GR874990|Panax quinquefolius||Pq_R_02473 American ginseng Root cDNA Library Panax quinquefolius cDNA 5', mRNA sequence.
CCCGGGCTGCAGGATTCGAATTCCGCTCGTCGGAGGTCTGTATCAAGAGAGGGAAAGTTCAGATCTGCTGCTTACACAACCTATACTCCGCCGCTGCTAAATTTCTCTCTCCGCTTTAGAGTATGGAGACCTTCCTATTTACCTCTGAATCTGTTAACGAGGGTCACCCAGACAAGCTTTGTGATCAGATCTCCGATGCGGTGCTTGATGCCTGCCTAGCCCAGGACCCCGACAGCAAGGTCGCCTGTGAGACTTGCACCAAGACCAACATGGTCATGGTCTTTGGGGAGATTACTACCAAGGCCGATGTAGACTACGAAAAGATTGTCCGTGAGACATGCCGTACCATTGGATTTGTTTCTGATGATGTGGGTCTTGACGCTGACAACTGCAAGGTCCTTGTAGACATTGAGCAGCAGAGCCCTGATATTGCC
>GR874984|Panax quinquefolius||Pq_R_02467 American ginseng Root cDNA Library Panax quinquefolius cDNA 5', mRNA sequence.
CCGGGCTGCAGGAATTCGAATTCAGAAAGTTCTGATCTGCTGCTTACACAACCTATACTCCGCCGCTGCTAAATTTCTCTCTCCGCTTTAGATTATGGAGACCTTCCTATTTACCTCTGAATCTGTTAACGAGGGTCACCCAGACAAGCTTTGTGATCAGATCTCCGATGCTGTGCTTGATGCCTGCCTTGCCCAGGACCCAGACAGCAAGGTCGCCTGTGAGACTTGCACCAAGACCAACATGGTCATGGTCTTTGGGGAGATTACTACCAAGGCCGATGTAGACTACGAAAAGATTGTCCGTGAGACATGCCGTACCATTGGATTTGTTTCTGATGATGTGGGTC
>GR874970|Panax quinquefolius||Pq_R_02453 American ginseng Root cDNA Library Panax quinquefolius cDNA 5', mRNA sequence.
ATTCCTTTAACCAAATCAATTAAGCTCCCACTCCATTACAGTACAGTACCTCTCCCCTCCATATTTCTCTTTTTCCCATGTACAATGGACATTAATTCTGAGAAGAATAACAAATAGTATATATATATATATATATATATATATATATATATATATATAGATGGCTTCATCTCCCATTACTTCTAAAGCTCCGGCAAACAGAATTCAGTGCCAAAGAGGAGGAATGGCTACTGATCAGAACGTTCTTCAAAAGCACGTTACTTTCTTCGATCAGAATAATGATGGAATCGTCTATCCTTGGGAGACTTTCCAAGGTTTTCGTGAAATTGGATGTGGACTCCTCTTG
>GR874878|Panax quinquefolius||Pq_R_02361 American ginseng Root cDNA Library Panax quinquefolius cDNA 5', mRNA sequence.
GGGCTGCAGGAATTCGAATTCCGGAATGGTAACACCCAGTCCTCCTATGTTCATGACGCCTGGGTGAAACCTATTTAAATGTTAAAGTCAAGGATCTCAAGCGCGGTTATGTTGCATCCAACTCCAAGGATGACCCTGCCAAGGGAGCTGCCAACTTCACATCTCAGGTCATCATCATGAACCACCTTTGACAGATTGGAAATGGATATGCCCTAGTTCTTGATTGCTACACCTCACATTGCTGTCAAGTTTGCTGAGCTCTTGACCAAGATCGACAGCTTAGGTAGGTCACCACAGCTTAGGTAGTGCCCCACAACTTAATTTTATGGATAGTTTGGTATATTTTGTGGATGTAGTAATTTAAAACTGTAAACGAATGATATTATTGGGTTGTATTTTGAATGGTTGATACATTTTGGCTTT
>GR872368|Panax quinquefolius||Pq_L_00515 American ginseng Leaf cDNA Library Panax quinquefolius cDNA 5', mRNA sequence.
GGGGGACCAAGACTAAGGGAGAGAAATGGTGGAGGAGATGGAGAAATTTGAAGATCAGGCCAAGATTAACGAAGACATCAAATCTACTGTTCGATCCGATGATGACGATGAAAGAGAAGATCTAGAGGAAGGAGAGATTGTCGGCGACGATGATACGGCGTCGTCCGTTAAGCCTACGGCAACTATTCCACATCCACTTGAGCACTCTTGGACTTTTTGGTTCGATAATCCCTCTGCTAAGTCCAAACAAACCGCTTGGGGCAGCTCTATTCGCCCCATCTGCACTTTCTCTTCAGTTGAAGAGTTCTGGAGCCTTTACAACAATATACATCATCCAAGCAAGTTGGCTCCAGGAGCGGACTTCCACTGTTTCAAAAATAAAATTGAGCCAAAGTGGGAGGACCCTATTTGTGCTAATGGAGGAAAGTGGACTTCTACCTTTTCAAAAGGAAAATCAGATACGGCTTGGCTGTATACGCTGCTAGCAATGATTGGAGAGCAGTTTGATTATGGAGATGAAATATGTGGAGCAGTTGTCAATGTCAGGGCTAGGCATGAAAAAATAGCTCTGTGGACCAAGAATGCTGCAAATGAAGCCGCTCAGTTGAGTATTGGGAAGCAATGGAAAGAGTTACTTGATTACAAGGAGAACATAGGGTTCATATTTCATGAGGAGGCAAAGAAGCTCGACAGAGCTGCCAAAAATAGATACACAGCATGAGGTCCATAGTGTTTAGGTTGCAAAGTGGTGCGGTGATGGCTGGAAAT
>GR872282|Panax quinquefolius||Pq_L_00429 American ginseng Leaf cDNA Library Panax quinquefolius cDNA 5', mRNA sequence.
GGGAAGAGGAAAGGGAATGGTTGATTCTCTCTTCCAAGCTCCGTCCGGTGCTGGAACTCATGATCCTATTATGAGTTCATATGAATACATCAGCACAGGACTTCGCACATATAACCTTGATAACAATATGGATGGATTCTACATAGCTCCATCTTTCATGGACAAGGTGGTTGTTCACATAAGTAAAAACTTCATGACCCTGCCTAACATCAAGATTCCTCTTATTCTTGGTGTTTGGGGTGGAAAAGGACAAGGAAAATCTTTCCAGTGTGAGCTTATCTTTGCCAAGATGGGGATTACCCCAATCATGATGAGTGCCGGAGAGTTGGAAAGTGGGAATGCAGGAGAACCTGCAAAATTAATCCGACAAAGGTATCGTGAAGCAGCTGATATCATTAGGAAAGGAAAAATGTGCTGCCTATTTATCAATGATTTAGATGCTGGAGCAGGTAGAATGGGAGGAACCACTCAGTACACTGTCAACAACCAGATGGTGAATGCCACACTTATGAACATTGCCGATAACCCCACAAGTGTGCAGCTTCCCGGTATGTACAATAAGGAGGAAAATCCCCGCGTGCCAATCATAGTCACAGGAAATGACTTCTCCACTTTGTATGCCCCTCTCATTCGTGATGGGCGTATGGAGAAGTTCTATTGGGCTCCAACTCGAGATGATCGTATTGGTGTTTGCATTGGAATCTTCNAAAGTGACAATGTTCCCGATGAGGATGTTGTCAAGATTGTTGACACCTTCCCTGGCCAGTCTATTGATTTCTTTGGTGCTCT
>GR872083|Panax quinquefolius||Pq_L_00230 American ginseng Leaf cDNA Library Panax quinquefolius cDNA 5', mRNA sequence.
GGGGGGGAATAATTTAGTTAGCTTTGAAACAAAAGGCAGCAATGGCATCTCTAGCAACCTTTGCTGCTGTTCAGCCCATCACCGTTAAGGGCCTTGGTGCTGGAAGTTCACTTACTGGGACTAAGCTCCACATCAAGCCATCTCGCCAGAGTTTGAGATCCGTCAATTGCAAGGCTGGTGCTGTTGTGGCCAAATATGGTGAAAAGAGTGTCTACTTTGATTTGGAGGATTTGGGCAACACCACCGGCCAGTGGGACTTGTATGGATCTGATGCACCTTCACCATACAACCCTCTTCAGAGCAAGTTCTTTGAGACATTTGCCGCTCCCTTCACTAAGAGAGGCCTTTTGCTCAAATTCTTGATACTGGGAGGTGGTTCCACCCTTGCTTATCTAAGCTCAACAGCCTCAGGGGATGTTCTACCAATCAAGAAGGGACCACAACTTCCACCAAAGCTTGGTCCACGTGGAAAAATCTAATTTTTCTAGATCCTACATCCTTCAAACCCGTGGTTGTGATTAAATGTATCTTCCTTTGTAAGTATGTTTGGATCCCAACTAAGACCCCTTAATTATTTTGAAGTGTTGTTTATGTC
>GR872071|Panax quinquefolius||Pq_L_00218 American ginseng Leaf cDNA Library Panax quinquefolius cDNA 5', mRNA sequence.
GGGGAATGGGAGTGAGGAAATCTCACCTTATCCACACTCCCACCACAACATATAATCAATCAATCACACTACTAATCCACAACCCAAATAAACAAATCACCACAGCCTCCCTCCCTCCCTCCCTCCCTCTTCACCTTATTCTGCACGCACTAAGCTTAATTGCTACCAAATGGCAGCCATGAACTCCAGTGTGTTGGCATGCAGCTATGCTATATCCGGTACCGGATCGTCGGAGCTAAGCTCCAAGTTGCCTTCAGTTGGATCCTCAGTTGTTAAAATGCCAGTTATCAGGGCTCAACAGGCTAGACTTTCTGATTCCAGAGAATCACGCCATGACAGTGTCCAAGGAAGAAGGGCTGCATTTCTTTGCCTCGGAGCTGCCCTTTTCGCCGCCGCCGCCACCACTTCTTCTGCCAATGCTGGAGTTATTGAAGATGCACTCGAGAAATCCAAAGCCAACAAGGAATTGAATGATAAGAAAAGGTTGGCTACGAGTGGAGCAAACTTTGCTAGAGCATATACAGTTCAGTTTGGCACATGCACTTTCCCATATAACTTCACTGGCTGCCAAGATCTTGCCAAGCAAAAAGAAAGTGCCATTTATTTCTGATGATTTGGAGTTGGAGTGCGAAGGAAAGGAAAAATACAAGTGTGGTTCCAATGTGTTCTGGAAATGGTGAAGAGTG
>GR872063|Panax quinquefolius||Pq_L_00210 American ginseng Leaf cDNA Library Panax quinquefolius cDNA 5', mRNA sequence.
GGGGGTCGCCGTGTCTCGCTCGTCGGAGGTCTGTATCAAGAGAGGGAAAGTTCAGATCTGCTGCTTACACAACCTATACTCCGCCGCTGCTAAATTTCTCTCTCCGCTTTAGAGTATGGAGACCTTCCTATTTACCTCTGAATCTGTTAACGAGGGTCACCCAGACAAGCTTTGTGATCAGATCTCCGATGCGGTGCTTGATGCCTGCCTAGCCCAGGACCCCGACAGCAAGGTCGCCTGTGAGACTTGCACCAAGACCAACATGGTCATGGTCTTTGGGGAGATTACTACCAAGGCCGATGTAGACTACGAAAAGACTGTCCGTGAGACATGCCGTACCATTGGATTTGTTTCTGATGATGTGGGTCTTGACGCTGACAACTGCAAGGTCCTTGTAAACATTGAGCAGCAGAGCCCTGATATTGCCCAGGGTGTCCACGGCCACCTTACAAAGCGCCCAGAGGAGATCGGTGCAGGTGACCAGGGCCATATGTTTGGCTATGCCACTGATGAAACCCCTGAACTTATGCCTCTGAGCCATGTCCTTGCAACCAAACTTGGGGCTCGCCTGACTGAGGTTCGAAAGAACGGTACCTGCGCCTGGCTGAGACCTGATGGTAAGACTCAAGTCACTGTTGAGTATTATAACGAGAATGGTGCGATGGTTCCAATTCGTGTTCATACTGTCCTTATCTCCACCC
>GR872056|Panax quinquefolius||Pq_L_00203 American ginseng Leaf cDNA Library Panax quinquefolius cDNA 5', mRNA sequence.
GGGGTGTGAAGATGGTTGTTGAACTTCATGTTCCAGTCGCTTGTGAGCAAGGGATGAGGTTTGCTATCAGAGAAGGAGGGAAGACTGTTGGAGCTGGTGTTATTAATGCCATTATTGAGTGATAAGTCTTCCTCAGGTGATCGGCGCTTTTGGGTGTATCAAAGTTTAAGTCTTTAGCTTTTGTGAAATTAGTTTTACCTCTTTATTTATTAAACATGTTGAACCCAATGTCATATATGCTGCAATCATTTTGTTGCTTCTCTTATATATTTTTGCGTCTTACTTTAGTTG
>GR873980|Panax quinquefolius||Pq_R_01463 American ginseng Root cDNA Library Panax quinquefolius cDNA 5', mRNA sequence.
ATTCCTCGCCCGTGGACTGTATCAAGAGAGGGAAAGTTCAGATCTGCTGCTTCCTCAACCTATACTCCGCCGCTGCTAAATTTCTCTCTCCGCTTTAGAGTATGGAGACCTTCCTATTTACCTCTGAATCTGTTAACGAGGGTCACCCAGACAAGCTTTGTGATCAGATCTCCGATGCGGTGCTTGATGCCTGCCTAGCCCAGGACCCCGACAGCAAGGTCGCCTGTGAGACTTGCACCAAGACCAACATGGTCATGGTCTTTGGGGAGATTACTACCAAGGCCGATGTAGACTACGAAAAGATTGTCCGTGAGACATGCCGTACCATTGGATTTGTTTCTGATGATGTGGGTCTTGACGCTGACAACTGCAAGGTCCTTGTAAACATTGAGCAGCAGAGCCCTGATATTGCCCAGGGTGTCCACGGCCACCTTACAAAGCGCCCAGAGGAGATCGGTGCAGGTGACCAGGGCCATATGTTTGGCTATGCCACTGATGAAACCCCTGAACTTATGCCTCTGAGCCATGTCCTTGC
>GR873891|Panax quinquefolius||Pq_R_01374 American ginseng Root cDNA Library Panax quinquefolius cDNA 5', mRNA sequence.
ATTCAGACACGGTAAGTTCAGATCTGCTGCTTACACAACCTATACTCCGCCGCTGCTAAATTTCTCTCTCCGCTTTAGAGTATGGAGACCTTCCTATTTACCTCTGAATCTGTTAACGAGGGTCACCCAGACAAGCTTTGTGATCAGATCTCCGATGCGGTGCTTGATGCCTGCCTAGCCCAGGACCCCGACAGCAAGGTCGCCTGTGAGACTTGCACCAAGACCAACATGGTCATGGTCTTTGGGGAGATTACTACCAAGGCCGATGTAGACTACGAAAAGATTGTCCGTGAGACATGCCGTACCATTGGATTTGTTTCTGATGATGTGGGTCTTGACGCTGACAACTGCAAGGTCCTTGTAAACATTGAGCAGCAGAGCCCTGATATTGCCCAGGGTGTCCACGGCCACCTTACAAAGCGCCCAGAGGAGATCGGTGCAGGTGACCAGGGCCATATGTTTGGCTATGCCACTGATGAAACCCCTGAACTTATGCCTCTGAGCCATGTCCTTGCAACCAAACTTGGGGCTCG
>GR873777|Panax quinquefolius||Pq_R_01260 American ginseng Root cDNA Library Panax quinquefolius cDNA 5', mRNA sequence.
TTGTTTTCCTCTCTCCATTTCATTAGCCCCTAAATGGCTCCCAAGGCAGATAAGAAACCCGCCGAGAAGAAACCCGCCGACGAGAAGAAAACCACCGTCGCCGAGAAAGCTCCGGCGGAGAAAAAACCCAAGGCCGGAAAGAAACTGCCGAAGGAAGGTGGATCGGCAGCCGGAGACAAGAAGAAGAAGAGGGTGAAGAAGAGCGTGGAAACCTACAAGATCTACATCTTCAAGGTGCTGAAGCAGGTCCATCCGGATATCGGAATCTCAAGCAAGGCCATGGGAATCATGAACAGTTTCATTAACGATATATTTGAGAAACTCGCTCAGGAATCTTCCCGGCTTGCGAGGTACAACAAGAAACCAACAATAACGTCGAGGGAGATTCAGACTGCGGTGAGACTTGTGCTTCCTGGCGAATTGGCCAAACACGCCGTATCTGAGGGGACTAAGGCGGTTACCAAGTTTACCAGCTCTTAAAATAAGGGTTTGCAGTTTTTTTCTTCTGAAATTTGGTGTAGGATTTAGGTATTAACTCATCCTTGTTTCTTTTGGTGT
>GR873700|Panax quinquefolius||Pq_R_01183 American ginseng Root cDNA Library Panax quinquefolius cDNA 5', mRNA sequence.
ATTCAAATTTCTCTCTCCGCTTTAGAGTATGGAGACCTTCCTATTTACCTCTGAATCTGTTAACGAGGGTCACCCAGACAAGCTTTGTGATCAGATCTCCGATGCGGTGCTTGATGCCTGCCTAGCCCAGGACCCCGACAGCAAGGTCGCCTGTGAGACTTGCACCAAGACCAACATGGTCATGGTCTTTGGGGAGATTACTACCAAGGCCGATGTAGACTACGAAAAGATTGTCCGTGAGACATGCCGTACCATTGGATTTGTTTCTGATGATGTGGGTCTTGACGCTGACAACTGCAAGGTCCTTGTAAACATTGAGCAGCAGAGCCCTGATATTGCCCAGGGTGTCCACGGCCACCTTACAAAGCGCCCAGAGGAGATCGGTGCAGGTGACCAGGGCCATATGTTTGGCTATGCCACTGATGAAACCCCTGAACTTATGCCTCTGAGCCATGTCCTTGCAACCAAACTTGGGGCTCGCCTGACTGAGGTTCGAAAGAACGGTACCTGCGCCTGGCTGAGACCTGATGGTAAGACTCAAGTCACTGTTGAGTATTA
>GR873660|Panax quinquefolius||Pq_R_01143 American ginseng Root cDNA Library Panax quinquefolius cDNA 5', mRNA sequence.
ATTCGAATTCGATAAAAGTTCAGATCTGCTGCTTACACAACCTATACTCCCCCTCTGCTAAATTTCTCTCTCCGCTTTAGATTATGGAGACCTTCCTATTTACCTCTGAATCTGTTAACGAGGGTCACCCAGACAAGCTTTGTGATCAGATCTCCGATGCTGTGCTTGATGCCTGCCTTGCCCAGGACCCAGACAGCAAGGTCGCCTGTGAGACTTGCACCAAGACCAACATGGTCATGGTCTTTGGGGAGATTACTACCAAGGCCGATGTAGACTACGAAAAGATTGTCCGTGAGACATGCCGTACCATTGGATTTGTTTCTGATGATGTGGGTCTTGATGCCGACAACTGCAAGGTCCTTGTTAACATTGAGCAGCAGAGCCCTGATATTGCCCAGGGTGTCCACGGCCACCTTACAAAGCGCCCAGAGGAGATCGGTGCAGGTGACCAGGGCCATATGTTTGGCTATGCCACTGATGAAACCCCTGAACTTATGCC
>GR873545|Panax quinquefolius||Pq_R_01028 American ginseng Root cDNA Library Panax quinquefolius cDNA 5', mRNA sequence.
ATTCCTGATCTTTTTGTCACCACCACCGGTAACAAGGACATCATCATGGTTGACTACATGAGGAAGATGAAGAACAATGCCATTGTTTGCAACATTGGTCACTTTGATAATGAAATTGACATGCTTGGTCTTGAGACATTCCCGGGTGTGAAGAGAATTACCATCAAGCCCCAAACCGACAGGTGGGTCTTCCCCGACACCCAATCGGGCATCATTGTTTTAGCCGAGGGACGTCTGATGAACTTGGGTTGCGCCACTGGTCACCCCAGCTTTGTGATGTCTTGCTCGTTCACGAACCAAGTGATTGCCCAGCTTGAGTTGTGGAAGGAAAGGAGCACCGGGAAGTACGAGAAGAAGGTGTACGTCTTGCCCAAGCACCTTGACGAGAAGGTAGCAGCTCTTCATCTTGGAAAACTTGGTGCTAAGCTCACTAAGCTCAGCAAGGACCAGGCTGATTACATTAGTGTACCAGTTGAGGGACCATACAAGCCTGTTCACTACAGGTACTGAGAAGGAAATGATTG
>GR873507|Panax quinquefolius||Pq_R_00990 American ginseng Root cDNA Library Panax quinquefolius cDNA 5', mRNA sequence.
ATTCAGGACCCTTATAAAAGTTCTAACCATATTTATAGGCACTTTCTCTTCCTTTTTTCTCTCTCTTTAAGGAATGGATACATTCTTGTTCACATCTGAGTCCGTCAATGAGGGACATCCCGACAAACTTTGTGACCAGATCTCAGATGCAGTCCTTGATGCTTGCCTGGCACAGGACCCTGAGAGCAAGGTTGCCTGTGAGACCTGCACCAAGACCAACATGGTCATGGTCTTTGGAGAAATCACCACCAAGGCTGATGTAGATTATGAGAAAATTGTGCGTGACACTTGCCGTGCAATTGGATTTGTATCTGATGATGTGGGTTTGGATGCCGACAACTGCAAGGTCCTTGTCAACATTGAGCAACAGAGCCCTGATATTGCCCAAGGTGTCCACGGTAATCTGACCAAGAGACCTGAGGAGATTGGTGCTGGTGACCAAGGTCATATGTTTGGTTATGCAACTGATGAGACCCCGGAGCTGATGCCCCTCAGCCATGTTCTTGCTACCAAGCTTGGAGCTCGCC
>GR873421|Panax quinquefolius||Pq_R_00904 American ginseng Root cDNA Library Panax quinquefolius cDNA 5', mRNA sequence.
ATTATGAACGCTCACAAGATAATTGAGAGAGTTCAGAGGGAACAGAGGTTTCAGTATGGTATCAAAAACCCTAGAACTTTGATTATCATTACTCCAACTTATGTACGAACATTCCAGACTCTGCATCTCACTGGATTAATGCATTCGTTGATGAATCTTCCGTATGATCTCATGTGGATCGTTGTAGAAGCTGGTGGAACCACCAATGAAACCGCCTCGCTTCTCACCAAGTCAGGACTTTCCACTATGCACATTGGATTTGAGGAAAAGATGCCGGTTTTATGGGAGGATCGCCATCGGATGGAGGCTCGGATGCGAATCCTCGGATTGAGAGTTGTAAGAGAAGAGAAACTAGATGGAATTGTGATGTTTGCGGATGATAGTAATATGCATAGTATGGAGCTTTTTGATGAGATCCAAAAGGTGAAGGGGATTGGTGCAGTTTCAATTGGTATACTTGCTCATTCCAGTAATTCTGACCAACAACTTCGAGTAGTTCAGAACAAAGGGGAGGACATTAAGTC
>GR873412|Panax quinquefolius||Pq_R_00895 American ginseng Root cDNA Library Panax quinquefolius cDNA 5', mRNA sequence.
ATTGTCTCGCTTGTCGGAGGTCTGTATCAAGAGAGGGAAAGTTCAGATCTGCTGCTTACACAACCTATACTCCGCCGCTGCTAAATTTCTCTCTCCGCTTTAGAGTATGGAGACCTTCCTATTTACCTCTGAATCTGTTAACGAGGGTCACCCAGACAAGCTTTGTGATCAGATCTCCGATGCGGTGCTTGATGCCTGCCTAGCCCAGGACCCCGACAGCAAGGTCGCCTGTGAGACTTGCACCAAGACCAACATGGTCATGGTCTTTGGGGAGATTACTACCAAGGCCGATGTAGACTACGAAAAGATTGTCCGTGAGACATGCCGTACCATTGGATTTGTTTCTGATGATGTGGGTCTTGACGCTGACAACTGCAAGGTCCTTGTAAACATTGAGCAGCAGAGCCCTGATATTGCCCAGGGTGTCCACGGCCACCTTACAAAGCGCCCAGAGGAGATCGGTGCAGGTGACCAGGGCCATATGTTT
>GR873397|Panax quinquefolius||Pq_R_00880 American ginseng Root cDNA Library Panax quinquefolius cDNA 5', mRNA sequence.
ATTCTAAACCTATTAAGTCTCGTTTCTGTAGTGGACCAATTCGTTAACATACCGCCGAGCCATTTTTTATTAACATAATGACACCGAGCCTTTATTGCAGCCCATGCTACTAAGTTAGCTGCTTTATTTTTAGTGCCAACGATTAAGAATTGTTTTCCCCTACTTGCTGCATCAAAAACCAAATCACAAGCTTCTAATAAAAAACGAGCAGTTCTAGTAAGATTTGTAATATGAATACCTTTACGCTTTGCAGAGATATAAGGGGCCATTTTAGGATTCCATTTCTTAGTACCATGTCCAAAATGAACTCCGGCCTTCATCATCTCTTCCAAATTGATGTTCCAATATCTTTTTGTCATTTCTCCACATATCCCCCCTTTTTCAAAAAAAAAAGAGACGAGGGTATCCTGAAATAAATAATTGTTCCGATGGAACCTTCTCTTCTACCGCAAATTAGCCGTAGATACACGACCCAAGCCATTATTCTTTTCTATTCGTTATTATCTTTATTACTAAATCGTTATTAT
>GR874775|Panax quinquefolius||Pq_R_02258 American ginseng Root cDNA Library Panax quinquefolius cDNA 5', mRNA sequence.
TGCAGGAATTCGAATTCGAATTCTACCATCAAGCCCCAAACCGACAGGTGGGTCTTCCCCGACACCCAATCGGGCATCATTGTTTTAGCCGAGGGACGTCTGATGAACTTGGGTTGCGCCACTGGTCACCCCAGCTTTGTGATGTCTTGCTCGTTCACGAACCAAGTGATTGCCCAGCTTGAGTTGTGGAAGGAAAGGAGCACCGGGAAGTACGAGAAGAAGGTGTACGTCTTGCCCAAGCACCTTGACGAGAAGGTATCAGCTCTTCATCTTGGAAAACTTGGTGCTAAGCTCACTAAGCTCAGCAAGGACCAGGCTGATTACATTAGTGTACCAGTTGAGGGACCATACAAGCCTGTTCACTACAGGTACTGAGAAGGAAATGATTGTGAGATTGAGAAAAACAGAATGTTCAACGGCTTGATTGTGTAATTTTAATACTTTTGCTTTTGTGTAGAACACTAGTAGTTGCGAGTTTTATGGGGGTATGAAAGTGGGAGAAAATGGATTGGTCTCTGTTGAAATAAACCATG
>GR874680|Panax quinquefolius||Pq_R_02163 American ginseng Root cDNA Library Panax quinquefolius cDNA 5', mRNA sequence.
GCTGCAGGAATTCGAATTCGAATTCGCTCTCTTGCGTCCTCCTTCCGGAGTTATTTATTCCCTCAAAAAATCCGATCCAGACCTAGCTTTGTCTGTCTTCTACAATCTTTTTAGATATGTCCGACGAGGAGCACCAGTTCGAATCCAAGGCCGATGCCGGAGCCTCCAAGACCTTCCCTCAGCAAGCTGGCACCATCCGCAAAAATGGTTACATCGTCATCAAAGACCGCGCTTGCAAGGTTGTAGAAGTTTCTACCTCTAAGACTGGCAAGCATGGTCATGCTAAATGTCACTTTGTTGCGATCGACATCTTTAATGGAAAAAAACTTGAAGATATTGTACCCTCGTCTCACAACTGTGATGTT
>GR873303|Panax quinquefolius||Pq_R_00786 American ginseng Root cDNA Library Panax quinquefolius cDNA 5', mRNA sequence.
ATTCGGAACCCTTTTAAATGGTGATGATGGTCAGACACAGTTTGTGATTGCCCTTCAAGTTCTCCCTTGTCTCTATCAACTTCTTACGCAAAATCACAAGAAGAGCATCAAGAAAGAAGCTTGTTGGACAATTTCAAATATTACAGCTGGGAATAAAGCTCAGATACAGGCTGTTGTTGAGGCCAATATCATCCTTCCTCTGGTACACCTTCTTCAACATGCGGAATTTGATATTAAGAAAGAAGCTGCATGGGCCGTATCAAATGCCACCTCTGGAGGATCCCATGATCAAATCCGATTCTTGGCGAGCCAAGGTTGCATTAAGCCACTCTGTGATCTCCTGATCTGTCCGGATCCAAGGATTGTGACGGTGTGCCTTGAGGGGCTTGAAAACATTCTAAAGGTGGGAGAGGCTGACAAAGAAATGGGTATGAATGGTGGAATCAATATCTATGCACAACTAGTTGATGAATGCGAAGGATTGGATAAGATTGAAAATCTTCAAACTCACGACAACAATGAGATCTATGAGAAGGCTGTGAAGATCTTAGAGAG
>GR874563|Panax quinquefolius||Pq_R_02046 American ginseng Root cDNA Library Panax quinquefolius cDNA 5', mRNA sequence.
AAAGACCTTTCCGAAAGTGAAGTGAGTATTTCAACTCAATTGATTGGTCAATTGGATGCTTTGATGCCTTCTGGACCTCCAGGGCAACAAAGAAGAAGAATAGAAGGTAATGAACAGAAAAAGAAACGAATGAAGGGTGATTCAGATATCTCAAGGGTTTCTCCTTCAGTACGGAACCACCTGGACAATCTTGCAAGTTTAAAGGGTGAACAAGTAGCAGCTAGGGTCACACTAGAGGACGCTGATAAAGACGAGTGGTTCATTGTTAAAGTAATTCATTTTGATAGGGAATCAAGAGAATTTGAAGTACTTGATGAAGAACCAGGAGATGACG
>GR873216|Panax quinquefolius||Pq_R_00699 American ginseng Root cDNA Library Panax quinquefolius cDNA 5', mRNA sequence.
ATTCGTAGCCCCTTATTCAGCAAACCAGTGCGGCAGCGTCACACTTCCACCACCGCCACCATGGGTCGTATGCACAGCCGAGGTAAGGGTATTTCAGCTTCAGCTCTGCCATACAAGAGGACCCCACCTAGTTGGCTGAAGATCACTCCTCAGGATGTTGATGATAACATTTGCAAGTTTGCGAAGAAGGGTCTAACACCTTCACAAATTGGTGTTATTCTTCGTGATTCTCATGGGATTGCTCAAGTGAAGAGCGTCACTGGTAGCAAGATTTTGCGTATACTCAAAGCCCACGGACTTGCTCCTGAAATTCCCGAGGACCTGTACCACCTCATTAAGAAAGCTGTTGCAATTAGGAAGCATTTGGAGAGGAACAGGAAGGACAAGGATTCCAAGTTTAGGTTGATCCTTGTTGAGAGCAGGATTCACCGACTTGCTCGCTACTACAAGAAGACCAAGAAGCTTCCTCCTGTCTGGAAATATGAATCCACCACTGCCAGCACACTTGTGGCGTAGAGAGGATATTTGGTAGAAAGAAGTCTGGGGTT
>GR872477|Panax quinquefolius||Pq_L_00624 American ginseng Leaf cDNA Library Panax quinquefolius cDNA 5', mRNA sequence.
GGGGGGGAATTTGGAAGTAGAAGTTTAGTTTTGAAGCTAAAAGGGACAGGCAGTCACCAGTCCAATGGCATCTCTAGCAACCTTTGCTGCTGTTCAACCCATCACCGTTAAGGGCCTTGGTGGAAGCTCACTTACCGGAACTAAGCTCCACATCAAGCCAGCTCGCCAGACTTTGAGACCCACCAATTTCAAAGCTGGTGCTGTGGTGGCAAAATATGGTGAAAAGAGTGTGTACTTTGATTTGGAGGATTTGGGCAACACCACTGGCCAATGGGACTTGTATGGTTCCGATGCTCCTTCACCATACAACCCTCTTCAGAGCAAGTTCTTTGAGACATTTGCCGCTCCCTTCACAAAGAGAGGTCTTTTGCTCAAATTCTTGATATTGGGAGGTGGTTCCACCCTTGCTTATCTAAGCTCCACAGCCTCGGGGGATATTCTACCAATCAAGAAGGGCCCACAACTTCCTCCAAAGCTTGGTCCACGTGGAAAAATCTAATTCATTCTAGCTCCTACATCCTTCAACCTCTTGATTGTGTTTAAAATGTATCTTCCCTACAGC
>GR872887|Panax quinquefolius||Pq_R_00370 American ginseng Root cDNA Library Panax quinquefolius cDNA 5', mRNA sequence.
ATTCGGGCCCCCTTTTCTCAGCAGGTAATAAGTTCCGGATGTCACTGGGTCTGCCTGTGGCAGCCACAGTGAATTGTGCTGATAATACTGGGGCAAAGAATCTCTATATCATTTCAGTGAAGGGGATTAAGGGTCGGTTGAACAGGTTGCCTTCAGCTTGTGTGGGAGATATGGTGATGGCTACTGTGAAGAAGGGGAAGCCCGATCTTCGTAAGAAGGTGATGCCAGCTGTCATTGTCAGGCAGCGCAAGCCTTGGCGCCGAAAGGATGGAGTTTTCATGTATTTTGAAGACAATGCTGGTGTCATTGTGAATCCAAAGGGAGAAATGAAAGGGTCTGCTATTACGGGCCCAATCGGAAAGGAGTGTGCTGATCTGTGGCCTAGGATTGCTAGTGCAGCTAATGCCATTGTCTAGAGTTCCCTCTTTCTTGACGTTTGAAAAAATTGTTACAGATAAATTTTGCTAGCTACAAATTGTTTTTTGTTACCTTTTTATCTGAAAAATGGTTCCTCACTATTTAATGGATGTTGATTTAG
>GR872832|Panax quinquefolius||Pq_R_00315 American ginseng Root cDNA Library Panax quinquefolius cDNA 5', mRNA sequence.
ATGAACCCACTGTTTCCTTTTATAATGATGCGGCTGATGATATAGAAGTCGAAAGAATTATTAGAAAATCTACAAGAACATCAGTCATTGTTACGCAAGCTGAAAGAGATGCAATACGTGCAGCATTGCAAGCAACTATGAAGCCAATAAAGAGAAAAAAAGAAGGCGAGGAGAAGAGGATGACTCAAGAAGAGATGCTTCTTGAAGCTGCTCAAACAGAAATCATGAACTTGAGGAACTTGGAACGTGTCTTAGCAAGGGAGGAAGAAGTTAAGAAAAGAGCAGTTGTGCATAAAGCAGTTTACCGTGGCCCTCAGATACAATATCTTTCTAAAAATGGCTGTTCATATCTAGAATTCAGTAATGGAGCATCGTTTCAGTCGGAGATTCCATCAGCATCTACCCCTTACCCGCAGAAGGCTGTGTGTGCAGTTACTGGACTGCCTGCAAAGTACAGGGATCCAAAGACAGGGCTACCTTATGCGACAAAAGAAGCTTTTAATGTTAT
>GR871853|Panax quinquefolius||Pq_F_01196 American ginseng Flower cDNA Library Panax quinquefolius cDNA 5', mRNA sequence.
ATTCCATTTCTCTCCCTTTAAGTCGGCGAGCGAGAGAAACTATCTACAGTTTCTCGTTTGATAAGCTTTTCGGTTGAACTATGGGTAAGGAAAAGTTTCACATTAACATTGTGGTTATAGGCCATGTCGACTCTGGAAAGTCTACCACCACAGGTCACTTGATCTACAAGCTTGGTGGTATTGACAAGCGTGTTATTGAAAGGTTTGAGAAGGAGGCTGCTGAAATGAACAAGAGGTCGTTCAAGTATGCCTGGGTGCTTGACAAGCTCAAGGCTGAGCGTGAACGTGGTATTACCATTGATATTGCCTTGTGGAAGTTTGAAACCACCAGGTACTACTGCACGGTCATTGATGCCCCTGGACATCGTGACTTTATCAAGAACATGATTACTGGTACCTCACAGGCTGACTGTGCCGTCCTCATCATTGACTCCACCACTGGTGGTTTTGAAG
>GR874520|Panax quinquefolius||Pq_R_02003 American ginseng Root cDNA Library Panax quinquefolius cDNA 5', mRNA sequence.
ATTCGCTGAAAGCCCTAACTCGATCTTCCAATCTCCCCTCTAATAATTCTTTTTCTTTATCAAAGTCTAGACTTCTCAGCGGAATTGTTAACAGTGAGTTCGTCACTTCTCACACTGCCAAATGGATGCAGGCCACAGACAAAAAATCACCAATGGAGTAGATCAATGAGGTTCCACCAATCAAGGTCGAAGGCAGGATTGTTGCTTGTGAAGGAGACACCAATCCCGCGCTTGGGCATCAAATTGAATTCATATGCCTTGACAAGGATGAGCAGGCTATCTGCAAGTATTGTGGCCTACGGT
>GR875257|Panax quinquefolius||Pq_R_02740 American ginseng Root cDNA Library Panax quinquefolius cDNA 5', mRNA sequence.
TGCAGGAATTCGAATTCTCGCAGAGCTCCTTCTCCTCTCCTCCGGATTTTCTACATCTCAAGGCTGCTCTGAAAATGACTCTTTCAAACGATATCGATTTATTGCACCCACCGGCTGATGTCGAGAAGAGGAAGCACAAGCTCAAGCGTCTCGTCCAAACCCCCAACTCTTTCTTTATGGACGTGAAATGCCAAGGATGTTTCAGCATAACCACTGTGTTTAGCCACTCCCAAACTGTTGTGGTGTGTGGAAACTGCCAGACAGTATTATGTCAGCCAACTGGTGGTCGTGCTAGGCTTACTGAGGGATCCTCATTTAGGAGAAAGAATGATTGATTGAGGCTTTAACTTTGCTCAGTAGATTCATAGATGAAGCAACTTTTTGTTCTGGTGGATCTTTCATATGTTAGTACTGGTTAAGCACCGAAGTTCACTATATCACAAGTTATGTACGATGTGTTTTTTGGTAATTTATTTGTTGCTCTAGTTGAATTGG
>GR875256|Panax quinquefolius||Pq_R_02739 American ginseng Root cDNA Library Panax quinquefolius cDNA 5', mRNA sequence.
GGATCACCCGGGCTGCAGGAATCGAATTCGGGAAAGTTCAGATCTGCTGCTTACACAACCTATACTCCGCCGCTGCTAAATTTCTCTCTCCGCTTTAGAGTATGGAGACCTTCCTATTTACCTCTGAATCTGTTAACGAGGGTCACCCAGACAAGCTTTGTGATCAGATCTCCGATGCGGTGCTTGATGCCTGCCTAGCCCAGGACCCCGACAGCAAGGTCGCCTGTGAGACTTGCACCAAGACCAACATGGTCATGGTCTTTGGGGAGATTACTACCAAGGCCGATGTAGACTACGAAAAGATTGTCCGTGAGACATGCCGTACCATTGGATTTGTTTCTGATGATGTGGGTCTTGACGCTGACAACTGCAAGGTCCTTGTAAACATTGAGCAGCAGAGCCCTGATATTGCCCAGGGTGTCCACGGCCACCT
>GR875243|Panax quinquefolius||Pq_R_02726 American ginseng Root cDNA Library Panax quinquefolius cDNA 5', mRNA sequence.
TGCAGGAATTCGAATTCTTGTTCACATCTGAGTCCGTCAATGAGGGACATCCCGACAAACTTTGTGACCAGATCTCAGATGCAGTCCTTGATGCTTGCCTGGCACAGGACCCTGAGAGCAAGGTTGCCTGTGAGACCTGCACCAAGACCAACATGGTCATGGTCTTTGGAGAAATCACCACCAAGGCTGATGTAGATTATGAGAAAATTGTGCGTGACACTTGCCGTGCAATTGGATTTGTATCTGATGATGTGGGTTTGGATGCCGACAACTGCAAGGTCCTTGTCAACATTGAGCAACAGAGCCCTGATATTGCCCAAGGTGTCCACGGTAATCTGACCAAGAGACCTGAGGAGATTGGTGCTGGTGACCAAGGTCATATGTTTGGTTATGCAACTGATGAAACCCCGGAGCTGATGCCCCTCAGCCATGTTCTTG
>GR875152|Panax quinquefolius||Pq_R_02635 American ginseng Root cDNA Library Panax quinquefolius cDNA 5', mRNA sequence.
ATTCGGGAAAGTTCAGATCTGCTGCTTACACAACCTATACTCCGCCGCTGCTAAATTTCTCTCTCCGCTTTAGAGTATGGAGACCTTCCTATTTACCTCTGAATCTGTTAACGAGGGTCACCCAGACAAGCTTTGTGATCAGATCTCCGATGCGGTGCTTGATGCCTGCCTAGCCCAGGACCCCGACAGCAAGGTCGCCTGTGAGACTTGCACCAAGACCAACATGGTCATGGTCTTTGGGGAGATTACTACCAAGGCCGATGTANACTACGAAAAGATTGTCCGTGAGACATGCCGTACCATTGGATTTGTTTCTGATGATGTGGGTCTTGACGCTGACAACTGCAAGGTCCTTGTAAACATTGAGCAGCAGAGCCCTGATATTG
>GR874352|Panax quinquefolius||Pq_R_01835 American ginseng Root cDNA Library Panax quinquefolius cDNA 5', mRNA sequence.
ATTCCTCCCCCTTTATATCTATCTATCTGTTTATATAAATCAAAAGAACAACATTATGCAGCAGCAGAGGCTGAAGCAGCAACAAGCATTGATGCAGCAATCTCTTTACCACCCAGGTCTCTTGGCTCCTCCCCAGTTATGTTGGGAACATCCACCCACAAGTTACAGAACCCCTTCTTCAAGAGGTCTTCTCCAGTACCGGTCCCCTTGAAGGCTGCAAGCTCATTCGAAAGGAGAAGTCATCCTATGGCTTTGTGGACTACTTTGATCGCAGATCTGCTGCTCTTGCTATTGTGACTCTTAATGGAAGGCATTTGTTTGGACAACCTATCAAAGTTAACTGGGCATATGCTAGTAGTCAGAGAGAGGATACATCAGGCCACTTTAACATTTTTGTTGGTGATCTAAGCCCTGAGGTTACAGATGCCACATTATTTGCTTGCTTTTCCGTGTATCCTAGTTGCTCTGATGCAAGAGTTATGTGGGATCAGAAAACTGGGC
>GR871592|Panax quinquefolius||Pq_F_00935 American ginseng Flower cDNA Library Panax quinquefolius cDNA 5', mRNA sequence.
ATTCATCATTTCTCCCCTTTTAAGTCGGCGAGCGAGAGAAACTATCTACAGTTTCTCCTTTGATAAGCTTTTCGGTTGAACTATGGGTAAGGAAAAGTTTCACATTAACATTGTGGTTATAGGCCATGTCGACTCTGGAAAGTCTACCACCACAGGTCACTTGATCTACAAGCTTGGTGGTATTGACAAGCGTGTTATTGAAAGGTTTGAGAAGGAGGCTGCTGAAATGAACAAGAGGTCGTTCAAGTATGCCTGGGTGCTTGACAAGCTCAAGGCTGAGCGTGAACGTGGTATTACCATTGATATTGCCTTGTGGAAGTTTGAAACCACCAGGTACTACTGCACGGTCATTGATGCCCCTGGACATCGTGACTTTATCAAGAACATGATTACTGGTACCTCACAGGCTGACTGTGCCGTCCTCATCATTGACTCCACCACTGGTGGTTTTGAAGCTGGTATCTC
>GR874226|Panax quinquefolius||Pq_R_01709 American ginseng Root cDNA Library Panax quinquefolius cDNA 5', mRNA sequence.
ATTGGGCAACCCTTTAAAAGCTGCTTACACAACCTATACTCCGCCGCTGCTCCCTTTCTCTCTCCGCTTTAGAGTATGGAGACCTTCCTATTTACCTCTGAATCTGTTAACGAGGGTCACCCAGACAAGCTTTGTGATCAGATCTCCGATGCGGTGCTTGATGCCTGCCTAGCCCAGGACCCCGACAGCAAGGTCGCCTGTGAGACTTGCACCAAGACCAACATGGTCATGGTCTTTGGGGAGATTACTACCAAGGCCGATGTAGACTACGAAAAGATTGTCCGTGAGACATGCCGTACCATTGGATTTGTTTCTGATGATGTGGGTCTTGACGCTGACAACTGCAAGGTCCTTGTAAACATTGAGCAGCAGAGCCCTGATATTGCCCAGGGTGTCCACGGCCACCTTACAAAGCGCCCAGAGGAGATCGGTGCAGGTGACCAGGGCCATATGTTTGGCTATGCCACTGATG
>GR874122|Panax quinquefolius||Pq_R_01605 American ginseng Root cDNA Library Panax quinquefolius cDNA 5', mRNA sequence.
ATTTCTCACCCCTTTAACGAGTTCTCGTATCCGGCGGCTATGACGGTTACGCCTTCGCCGTGATCCAACCAAGACTCCTCCAAAATGCGATCTATGGCACTACCACCGCCAGGTCCTTCTCCTCTGCTCGTTCGCCTCCGCCGCCATGGTTTTCTTCCTGTACTGGCTACAATTATGGACTTGCCGGAGCTCTATTCGCTGTTGCTGGAGCCGCCTCATTCTTCCAAGAGGAGACTTATGCTAAAGAGCTTACTTCTCCGGAGCTCGTCCCAAAGGAGGTTGTGTTGTATCAGTATGAAGCGTGCCCCTTTTGTAACAAAGTTAAAGCATTCCTTGACTATTATGATGTGCCCTACAAAGTTGTGGAGGTGAATCCACTAAGCAAGAAGGAAATCAAATGGTCTGATTATAAGAAGGTGCCTATATTGATGGTGGATGGTGAACAGCTGAATGATTCATCAGCAATTATTAATAAATTGGGTGAAAAAATTAATCCCGAGAAATCTGTTAAAGCAGTCCCAGATGACGATGAAG
>GR874109|Panax quinquefolius||Pq_R_01592 American ginseng Root cDNA Library Panax quinquefolius cDNA 5', mRNA sequence.
ATTCGAGACCCTTTGATCTGCTGCTTACACAACCTATACTCCGCCGCTGCTCCATTTCTCTCTCCGCTTTAGATTATGGAGACCTTCCTATTTACCTCTGAATCTGTTAACGAGGGTCACCCAGACAAGCTTTGTGATCAGATCTCCGATGCTGTGCTTGATGCCTGCCTTGCCCAGGACCCAGACAGCAAGGTCGCCTGTGAGACTTGCACCAAGACCAACATGGTCATGGTCTTTGGGGAGATTACTACCAAGGCCGATGTAGACTACGAAAAGATTGTCCGTGAGACATGCCGTACCATTGGATTTGTTTCTGATGATGTGGGTCTTGATGCCGACAACTGCAAGGTCCTTGTTAACATTGAGCAGCAGAGCCCTGATATTGCCCAGGGTGTCCACGGCCACCTTACAAAGCGCCCAGAGGAGATCGGTGCAGGTGACCAGGGCCATATGTTTGGCTATGCCACTGATGAAACCCCTGAACTTATGCCTCTGAGCCACGTCCTTGCAACCAAACTTGGGGCTCGCCTGAC
>GR871877|Panax quinquefolius||Pq_L_00024 American ginseng Leaf cDNA Library Panax quinquefolius cDNA 5', mRNA sequence.
GGGGATAACAATATGGATGGATTCTACATAGCTCTCTCTTTCATGGACAAGGTGGTTGTTCACATAAGTAAAAACGGCGTGACCCTGCCTAACATCAAGATTCCTCTTATTCTTGGTGTTTGGGGTGGAAAAGGACAAGGAAAATCTTTCCAGTGTGAGCTTATCTTTGCCAAGATGGGGATTACCCCAATCATGATGAGTGCCGGAGAGTTGGAAAGTGGGAATGCAGGAGAACCTGCAAAATTAATCCGACAAAGGTATCGTGAAGCAGCTGATATCATTAGGAAAGGAAAAATGTGCTGCCTATTTATCAGTGATTTAGATGCTGGAGCAGGTAGAATGGGAGGAACCACTCAGTACACTGTCAACAACCAGATGGTGAATGCCACACTTATGAACATTGCCGATAACCCCACAAGTGTGCAGCTTCCCGGTATGTACAATAAGGAGGAAAATCCCCGCGTGCCAATCATAGTCACAGGAAATGACTTCTCCACTTTGTATGCCCCTCTCATTCGTGATGGGCGTATGGAGAAGTTCTATTGGGCTCCAACTCGAGATGATCGTATTGGTGTTTGCATTGGAATCTTCAAAAGTGACAATGTTCCCGATGAGGATGTTGTCAAGATTGTTGACACCTTC
>GR871953|Panax quinquefolius||Pq_L_00100 American ginseng Leaf cDNA Library Panax quinquefolius cDNA 5', mRNA sequence.
ATTACGGCCGGGGGGGGAATCTGGAAGTAGAAGTCAAGTTAGTTTTGAAGCTAAAAGGGACAGGCAGTCACCAGTCCAATGGCGTCTCTAGCAACCTTTGCTGCTGTTCAACCCATCACCGTTAAGGGCCTTGGTGGAAGCTCACTTACCGGAACTAAGCTCCACATCAAGCCAGCTCGCCAGACTTTGAGACCCACCAATTTCAAAGCTGGTGCTGTGGTGGCAAAATATGGTGAAAAGAGTGTGTACTTTGATTTGGAGGATTTGGGCAACACCACTGGCCAATGGGACTTGTATGGTTCCGATGCTCCTTCACCATACAACCCTCTTCAGAGCAAGTTCTTTGAGACATTTGCCGCTCCCTTCACAAAGAGAGGTCTTTTGCTCAAATTCTTGATATTGGGAGGTGGTTCCACCCTTGCTTATCTAAGCTCCACAGCCTCGGGGGATATTCTACCAATCAAGAAGGGCCCACAACTTCCTCCAAAGCTTGGTCCACGTGGAAAAATCTAACTTATTCTAGCTCCTACATCCTTCAACCTCTTGATTGTGTTTAAAATGTATCTTCCCTACA
>GR871909|Panax quinquefolius||Pq_L_00056 American ginseng Leaf cDNA Library Panax quinquefolius cDNA 5', mRNA sequence.
GGGGGGGAATAATTTAGTTAGCTTTGAAACAAAAGGCAGCAATGGCATCTCTAGCAACCTTTGCTGCTGTTCAGCCCATCACCGTTAAGGGCCTTGGTGCTGGAAGTTCACTTACTGGGACTAAGCTCCACATCAAGCCATCTCGCCAGAGTTTGAGATCCGCCAATTGCAAGGCTGTGCTGTTGTGGCCAAATATGGTGAAAAGAGTGTCTACTTTGATTTGGAGGATTTGGGCAACACCACCGGCCAGTGGGACTTGTATGGATCTGATGCACCTTCACCATACAACCCTCTTCAGAGCAAGTTCTTTGAGACATTTGCCGCTCCCTTCACTAAGAGAGGCCTTTTGCTCAAATTCTTGATACTGGGAGGTGGTTCCACCCTTGCTTATCTAAGCTCAACAGCCTCAGGGGATGTTCTACCAATCAAGAAGGGACCACAACTTCCACCAAAGCTTGGTCCACGTGGAAAAATCTAATTTTTCTAGATCCTACATCCTTCAAACCCGTGGTTGTGATTAAATGTATCTTCCTTTGTAAGTATGTTTGGATCCCAACTAAGACCCCTTAATTATTTTGAAGTGTTGTTTATGTCATTTGGGGCATTCTTGTTAACTTGAT
>GR872419|Panax quinquefolius||Pq_L_00566 American ginseng Leaf cDNA Library Panax quinquefolius cDNA 5', mRNA sequence.
GATGAACGACACAGATGTCTCGAAGCAGATCCAACAGATGGTCAGATTCATCCGCCAAGAAGCCGAAGAGAAGGCCAACGAGATCTCTGTCTCTGCTGAAGAAGAATTCAACATTGAGAAGTTGCAGATAGTGGAAGCTGAGAAGAAGAAGATTAGACAAGAGTATGAGCGCAAAGAGAAGCAAGTTGAAGTCCGAAAAAAAATTGAGTATTCTATGCAGCTCAATGCTTCTCGGATCAAAGTTCTTCAAGCTCAGGATGATTTGATTGGATCCATGAAGGAGGCAGCGTCAAAGGAGCTTTTGAACGTGAGCCATCATAACTTATTTCACCACCATGATTATCAAGGACTTATGAAAGCTCTCGTTGTCCAGAGTTTAGTGAGACTAAAAGAGCCTGCTGTCTTATTACGTTGTCGGAAAGAGGACCACATGTTGCTGGAGTCTATTTTGAGTTCAGCAAAGGAGGAATATGCAGTGAAAGCAAATGTTCATGAACCCGAGATTATTGTTGATAGTGTCCACCTTCCGCCAGCTCCTTCCCATCACCATGCTCATGGTCCTTCCTGTTCTGGAGGTATTGTGATGGCTTCTCGAGATGGGAAAATTGTAATCGAGAACACCCTTGATGCTAGATTGGACGTTGTGTTTCGCAAAAAACTGCCCGAGATTCGCAAGCGTCTCTTTGCTAAGGTTGCTGCTTGATGGGATATG
>GR872341|Panax quinquefolius||Pq_L_00488 American ginseng Leaf cDNA Library Panax quinquefolius cDNA 5', mRNA sequence.
GGGGGGGAATTTGGAAGTAGAAGTTTAGTTTTGAAGCTAAAAGGGACAGGCAGTCACCAGTCCAATGGCATCTCTAGCAACCTTTGCTGCTGTTCAACCCATCACCGTTAAGGGCCTTGGTGGAAGCTCACTTACCGGAACTAAGCTCCACATCAAGCCAGCTCGCCAGACTTTGAGACCCACCAATTTCAAAGCTGGTGCTGTGGTGGCAAAATATGGTGAAAAGAGTGTGTACTTTGATTTGGAGGATTTGGGCAACACCACTGGCCAATGGGACTTGTATGGTTCCGATGCTCCTTCACCATACAACCCTCTTCAGAGCAAGTTCTTTGAGACATTTGCCGCTCCCTTCACAAAGAGAGGTCTTTTGCTCAAATTCTTGATATTGGGAGGTGGTTCCACCCTTGCTTATCTAAGCTCCACAGCCTCGGGGGATATTCTACCAATCAAGAAGGGCCCACAACTTCCTCCAAAGCTTGGTCCACGTGGAAAAATCTAATTCATTCTAGCTCCTACATCCTTCAACCTCTTGATTGTGTTTAAAATGTATCTTCCCTACAGC
>GR872335|Panax quinquefolius||Pq_L_00482 American ginseng Leaf cDNA Library Panax quinquefolius cDNA 5', mRNA sequence.
ATTACGGCCGGGGGGGGAATCTGGAAGTAGAAGTCAAGTTAGTTTTGAAGCTAAAAGGGACAGGCAGTCACCAGTCCAATGGCGTCTCTAGCAACCTTTGCTGCTGTTCAACCCATCACCGTTAAGGGCCTTGGTGGAAGCTCACTTACCGGAACTAAGCTCCACATCAAGCCAGCTCGCCAGACTTTGAGACCCACCAATTTCAAAGCTGGTGCTGTGGTGGCAAAATATGGTGAAAAGAGTGTGTACTTTGATTTGGAGGATTTGGGCAACACCACTGGCCAATGGGACTTGTATGGTTCCGATGCTCCTTCACCATACAACCCTCTTCAGAGCAAGTTCTTTGAGACATTTGCCGCTCCCTTCACAAAGAGAGGTCTTTTGCTCAAATTCTTGATATTGGGAGGTGGTTCCACCCTTGCTTATCTAAGCTCCACAGCCTCGGGGGATATTCTACCAATCAAGAAGGGCCCACAACTTCCTCCAAAGCTTGGTCCACGTGGAAAAATCTAACTTATTCTAGCTCCTACATCCTTCAACCTCTTGATTGTGTTTAAAATGTATCTTCCCTACA
>GR872306|Panax quinquefolius||Pq_L_00453 American ginseng Leaf cDNA Library Panax quinquefolius cDNA 5', mRNA sequence.
GGGGGGGAATTTGGAAGTAGAAGTTTAGTTTTGAAGCTAAAAGGGACAGGCAGTCACCAGTCCAATGGCATCTCTAGCAACCTTTGCTGCTGTTCAACCCATCACCGTTAAGGGCCTTGGTGGAAGCTCACTTACCGGAACTAAGCTCCACATCAAGCCAGCTCGCCAGACTTTGAGACCCACCAATTTCAAAGCTGGTGCTGTGGTGGCAAAATATGGTGAAAAGAGTGTGTACTTTGATTTGGAGGATTTGGGCAACACCACTGGCCAATGGGACTTGTATGGTTCCGATGCTCCTTCACCATACAACCCTCTTCAGAGCAAGTTCTTTGAGACATTTGCCGCTCCCTTCACAAAGAGAGGTCTTTTGCTCAAATTCTTGATATTGGGAGGTGGTTCCACCCTTGCTTATCTAAGCTCCACAGCCTCGGGGGATATTCTACCAATCAAGAAGGGCCCACAACTTCCTCCAAAGCTTGGTCCACGTGGAAAAATCTAATTCATTCTAGCTCCTACATCCTTCAACCTCTTGATTGTGTTTAAAATGTATCTTCCCTACAGCTTGTAAGTATGTTGGATCCCATCTAAGACCCCTCTGATTATTTCAATATGTTTGTATTGTGATTTGGGGGCATTCTTGTAAACTTTATGCTTGGCTGTTGACTATCATATATTAATT
>GR871515|Panax quinquefolius||Pq_F_00858 American ginseng Flower cDNA Library Panax quinquefolius cDNA 5', mRNA sequence.
GTGGATCCCCCGCGGCTGCAGGATTCGAATTCCGCTCGTCCGCCCTTTGAATAAAGAGAGAGAAAGTTCAGATCTGCTGCTTACACCTTCTATACTCCGCCGCTGCTAAATTTCTCTCTCCGCTTTAGATTATGGAGACCTTCCTATTTACCTCTGAATCTGTTAACGAGGGTCACCCAGACAAGCTTTGTGATCAGATCTCCGATGCTGTGCTTGATGCCTGCCTTGCCCAGGACCCAGACAGCAAGGTCGCCTGTGAGACTTGCACCAAGACCAACATGGTCATGGTCTTTGGGGAGATTACTACCAAGGCCGATGTAGACTACGAAAAGATTGTCCGTGAGACATGCCGTACCATTGGATTTGTTTCTGATGATGTGGGTCTTGATGCCGACAACTGCAAGGTCCTTGTTAACATTGAGCAGCAGAGCCCTGATATTGCCCAGGGTGTCCACGGCCACCTTAC
>GR872255|Panax quinquefolius||Pq_L_00402 American ginseng Leaf cDNA Library Panax quinquefolius cDNA 5', mRNA sequence.
GGGGGTGGGAATCTGGAAGTAGAAGTCAAGTCAGTTTTGAAGCTAAAAGGGACAGGCAGTCACCAGTCCAATGGCATCTCTAGCAACCTTTGCTGCTGTTCAACCCATCACCGTTAAGGGCCTTGGTGGAAGCTCACTTACCGGAACTAAGCTCCACATCAAGCCAGCTCGCCAGACTTTGAGACCCACCAATTTCAAAGCTGGTGCTGTGGTGGCAAAATATGGTGAAAAGAGTGTGTACTTTGATTTGGAGGATTTGGGCAACACCACTGGCCAATGGGACTTGTATGGTTCCGATGCTCCTTCACCATACAACCCTCTTCAGAGCAAGTTCTTTGAGACATTTGCCGCTCCCTTCACAAAGAGAGGTCTTTTGCTCAAATTCTTGATATTGGGAGGTGGTTCCACCCTTGCTTATCTAAGCTCCACAGCCTCGGGGGATATTCTACCAATCAAGAAGGGCCCACAACTTCCTCCAAAGCTTGGTCCACGTGGAAAAATCTAACTTATTCTAGCTCCTACATCCTTCAACCTCTTGATTGTGTTTAAAATGTATCTTCCCTACAGCTTGTAAGTATGTTGGATCCCATCTAAGACCCCTCTGATTATTTCAATATGTTTGTATTGTGATTTGGGGGCATTCTTGTAAACTTTATGCTTGGCTGTTGACTATCATATATTGATAATCTACTTAC
>GR872114|Panax quinquefolius||Pq_L_00261 American ginseng Leaf cDNA Library Panax quinquefolius cDNA 5', mRNA sequence.
GGGGTTCCTGAAGAGAATTTCCTTGGTATTTGCAGTCGAGAATTACTGGCCAGAGGTAGTGAGCTTCTCAAGCGCACACGCAAAGGTGATCTTCATTGGAAAATAGTGTCTGTTTATATCAACAGGATGGGCCAGGTAATGCTGAAGATGAAGAGTAGACATGTTGCCGGGACCATCACCAAAAAGAAAAAGAATATGGTTTTGGAGTTGATGAAAGACATGCCAGCGTGGCCAGGCCGCCACTTGCTTGAGGGTGGTGAACACCGGCGGTACTTTGCGCTGAAGACTGTATTACGTGGAGTCGTCGAATTTGAGTGCCGTGATCAGAGGGAGTACGATATCTGGACTCAAGGTGTTTCGAGGCTGCTAACTATTGCTGCTGAAAGGAACAATAGACATGGGATATTATGAACAAGGGCTAGAATTGCC
>GR872027|Panax quinquefolius||Pq_L_00174 American ginseng Leaf cDNA Library Panax quinquefolius cDNA 5', mRNA sequence.
GGGGATAACAATATGGATGGATTCTACATAGCTCTCTCTTTCATGGACAAGGTGGTTGTTCACATAAGTAAAAACGGCGTGACCCTGCCTAACATCAAGATTCCTCTTATTCTTGGTGTTTGGGGTGGAAAAGGACAAGGAAAATCTTTCCAGTGTGAGCTTATCTTTGCCAAGATGGGGATTACCCCAATCATGATGAGTGCCGGAGAGTTGGAAAGTGGGAATGCAGGAGAACCTGCAAAATTAATCCGACAAAGGTATCGTGAAGCAGCTGATATCATTAGGAAAGGAAAAATGTGCTGCCTATTTATCAGTGATTTAGATGCTGGAGCAGGTAGAATGGGAGGAACCACTCAGTACACTGTCAACAACCAGATGGTGAATGCCACACTTATGAACATTGCCGATAACCCCACAAGTGTGCAGCTTCCCGGTATGTACAATAAGGAGGAAAATCCCCGCGTGCCAATCATAGTCACAGGAAATGACTTCTCCACTTTGTATGCCCCTCTCATTCGTGATGGGCGTATGGAGAAGTTCTATTGGGCTCCAACTCGAGATGATCGTATTGGTGTTTGCATTGGAATCTTCAAAAGTGACAATGTTCCCGATGAGGATGTTGTCAAGATTGTTGACACCTTC
>GR871491|Panax quinquefolius||Pq_F_00834 American ginseng Flower cDNA Library Panax quinquefolius cDNA 5', mRNA sequence.
CCCCGGGCTGCAGGATTCGAATTCCACACAGTCTACCCATTTAAAGCGATTTAGAAAAAATGGCACCGATTGCAGTTGCTGACTCGCTTCCCGATGGAACCCTCGCTTTCTTCGACGCCGAAGATCAGTTGCAACAGGTCTCTGTTCACTCTCTCGCCGCTGGTAAGAAGGTCGTCCTCTTCGGTGTTCCCGGTGCGTTCACTCCCACTTGCAGCGTGAATCATGTACCCGGATTCATTGAGAAGGCTGAGGAGTTTAAGGCCAAGGGCGTTGATGAAATTCTGTTGATCAGTGTTAATGATCCATTTGTGATGAAGGCATGGGCAAAAACTTACACGGACACAAAGTTCGTCAAGTTTTTGGCTGATGGTTCAGCAAAATACACCCATGCTCTTGGCCTAGAGCTTGACCTCTCGGAGAAGGGGCTTGGCACCCGCTCGCGCAGGTTTGCCTTGCTTGTGGATGACCTCAAGGTGAAGACTGCCA
>EW712296|Panax quinquefolius||GIN-FEQS9Seq2P8G09_M13F_D08 Ginseng F. equiseti subtraction library Panax quinquefolius cDNA, mRNA sequence.
CCGCGGGAATTCGATTAGCGTGGTCGCGGCCGAGGTACGCGGGGAGGGAAAGAAAAATGTCAAAGAAGGATGTGTTCATAGGTTCACTTGATCAAGGAACCACCAGCACCAGATTCATTATCTACGATGGCAACGCTCGTCCCATTGGATCTCATCAGGTTGAGTTCACTCAGTTCTGCCCAGAAGCAGGATGGGTGGAACACGATCCAATGGAGTTATTGGAAAGTGCGAGGCTTTGTATGTCAAAGGCTCTTGACAAGGCCACAGCTGATGGTCACAATGTTGACAATGGAATAAAGGCAATTGGAATCACCAATCAAAGAGAGACCACTGTCATTTGGGGCAAGTCTACTGGTAGCCCTCTTCATCATGCCATTGTTTGGACGGATGTTCGTACCACTTCTATTTGCAGGAGATTAGAGAAAGAATTGCAAGGGGGACGAGACCATTTTGTTGAGACATGTGGTCTACCCATAAGCACTTATTTCAGCGCATTGAAGCTTTTGTGGTCATTGGAAAATGTAGCGGCGGTTAAGAAAGCTGTTGAAACAGGGGATGCCCTGTTTGGAACTATTGACACCTGGTTAATTTGGAATCTAACCGGAGGGGTTAAGGGTGGTTTGCATGTCACTGACGTCTCGAATGCATCCCGGACTATGCTCATGAGTCTCAAAACACTTGATTGGGACAAACCAACATTGAAAGTACCTGCCCGGGCGGCCGCTCGAAATCACTAGTGAATTC
>EW712288|Panax quinquefolius||GIN-FEQS9Seq2P7H05_M13F_F02 Ginseng F. equiseti subtraction library Panax quinquefolius cDNA, mRNA sequence.
CCNNGGGAATTCGATTAGCGTGGTCGCGGCCGAGGTACATTTGTGCTAGACACCGAGACAAAAATATGGCTGGATATGCCCCCGTTACCAGTTCCTAGGTATGCACCAGCTACTCAACTCTGGAGAGGTAGACTCCACGTGATGGGTGGCAGCAAGGAAAATCGACATACCCCGGGATTAGAGCATTGGAGTCTTGCAGTGAAGGATGGCAAAGCTTTAGAGAAGGAATGGCGAACTGAGATACCTATACCCCGTGGTGGCCCACACAGGGCTTGTGTTGTTGTTGATGATCGGTTATATGTTATTGGTGGTCAAGAGGGTGATTTTATGGCCAAACCTGGTTCACCTATTTTCAAATGCTCCAGAAGGAACGAGGTTGTGTATGATGATGTATACATGCTAGATGATGAGATGAAGTGGAAAGTTTTACCTCCTATGCCAAAGCCTGATTCACATATAGAGTTTGCTTGGGTAGTTGTGAACAATTCTATTGTTATTGTTGGAGGCACAACAGAGAAGCACCCTGAAACCAAGAAGATGACGCTGGTTGGAGAAGTCCTCCAGTTTCAGCTAGATACACTGAAATGGTCAGTGGTCGGGAAACTTCCTTACCGTGTGAAAACCACACTGGTTGGATTCTGGAACGGGTGGTTGTACCTGCCCGGGCGGCCGCTCGAAATCACTAGTGATTC
>EW712093|Panax quinquefolius||Gin-FeqS5ASeqP1C05_M13_C05 Ginseng F. equiseti subtraction library Panax quinquefolius cDNA, mRNA sequence.
GGGCGATTGGGCCGACGTCGCATGCTCCCGGCCGCCATGGCGGCCGCGGGAATTCGATTTCGAGCGGCCGCCCGGGCAGGTACTGCTATTTGTCATAAGTTGAAGGAGGAGAATGGAATCTCTTACACACCTGATCAGATTGTGGTTAGTAATGGAGCAAAGCAGAGTATAATCCAAGCTGTTCTTGCTGTTTGTTCCCCAGGAGATGAGGTTATTATTCCAGCTCCTTTTTGGGTGAGTTATCCAGAAATGGCCAGGATAGCTGATGCAACGCCTGTGATTCTGCTGACCCACATCTCTGAAAACTTTCTTTTAGATCCAAAGCTTCTTGAATCCAAACTCACAGAGAAATCAAGATTACTTATTCTTTGTTCTCCTTCCAACCCAACTGGATCTGTTTACCCCAGGAAACTACTTGAGCAGATTGCTGTGATTGTTGCGAAGCATCCTAGACTTCTGGTGTTGTCTGACGAAATATATGAACACATTATTTATGCACCCGCAACTCACACAAGCTTTGCATCTTTGCCAGGCATGTATGATCGGACTCTGACAGTGAACGGATTTTCTAAGGCTTTTGCGATGACTGGTTGGAGGCTTGGATATATTGCTGGCGCCAAACACTTTGTTGCTGCGTGTGGAAAGATTCAAAGCCAGTGTCCAACAACAATAGTGCCATTTTTTGGAGATCAATTTTTCTGGGGTGAGAGAATACATCTAAGAGGACTGGGTCCTGCCCCAATCCCTATAACTAAGCTCAGTGTTGAAGCACTTTCAGATGCTATAAGATTCATGCTCCAGCCAGAGGTAAAATCTGTAGCAATGGAATTATCAAAGCTGATTGAAAATGAAGATGGCGTTGCATCTGCAGTTGATGCATTTCACCGACATTTGCCTCCAGAGATTCCATTTCCAAATGCACCTTTCAGATGATTCAGANAAGATGATCACCAAATCCATTGCAGTGGTTTTTACTAAAATGGGNNNNGTGNGCTGCCTTCNTGCGTTAGANNAACGANTTGTNTGNATAGTATAGANTGCATTTCAAATGANTATNNNNANCTAGCTGNNNCCGTACTCNNNCNACNNNCTANNNNAGNNATCNNNNNCNGCAGTCGANCNNNNGGNNNNNNCCANNNNTGGANGNNANCTNNNNNNNNNGNNNACCNANANCTGNNNNCNGGNNNNCNNNCNGNNGNANTNNNGTANCGNNNNCNCANNTNCNCCNCNCCNNA
>EW712062|Panax quinquefolius||Ginseng-Feq Contig25 Ginseng F. equiseti subtraction library Panax quinquefolius cDNA, mRNA sequence.
GCGGGGATCCGTGAAACCAAACACCTCAATCGTCAAGTAAAGGAACAATTACAATAGCCATGGTAGAGTAGACTGTAGAAGAGAGAGCGAGAGACAGGAGAGAGAAAGGAAAAATGGGAGGAGGAATGGAAGCAAACAAGAACAAGTGGATAGAGGAATGGGGTTCGGCTCGAGAGAATCTGGAACACAACTTCCGCTGGACCCGCCGCAATTTTGCTCTCGTCGGCATTTTCGGCATCGCACTCCCCGTCTTGGTCTACAAGGGCATCGTCAAAGAATTCCATATGCAAGATGAAGATGCAGGCAGGCCCTACAGGAAGTTCCTGTGAGTGTTTTGTAATTTCCATTAATAATTGTGGGTGCAGTAAAACTGGGTTTCTTACAGTCCACAAAGTATGCTTTTTCCCACTTTGGGGAAGTCGCCTTCTTATTCACTCTGTAACTTGGTTGCCATTTTCAACTGTACCTCGGCCGCGACCACGCTAATCACTAGTGAATTC
>ES673239|Panax ginseng||dlyl_EST000366 cDNA library of yellow fruit Panax ginseng leaves at flower fruit stage stage Panax ginseng cDNA clone dlyl1_000652, mRNA sequence.
GGGGGTGTAGCTTGTTACATGGGTCGTGAGTGGGAGCTTAGTTTCCGTCTGGGTATGCGACCTTGGATTGCTGTTGCATATTCAGCTCCTGTTGCAGCTGCTGCTGCTGTTTTCTTGATCTACCCAATCGGTCAAGGAAGTTTTTCTGATGGTATGCCTCTAGGAATCTCTGGTACTTTCAATTTCATGATTGTATTCCAGGCTGAACACAACATCCTTATGCACCCATTTCACATGTTAGGCGTAGCTGGTGTATTCGGCGGCTCCCTATTCAGTGCTATGCATGGTTCCTTGGTAACTTCTAGTATGATCAGGGAAACCACAGAAAATGAATCTGCTAATGAAGGTTACAGATTCGGG
>ES673222|Panax ginseng||dlyl_EST000349 cDNA library of yellow fruit Panax ginseng leaves at flower fruit stage stage Panax ginseng cDNA clone dlyl1_000605, mRNA sequence.
GGGGGGAGGAACCACTCAGTACACTGTCAACAACCAGATGGTGAATGCCACACTTATGAACATTGCCGATAACCCCACAAGTGTGCAGCTTCCCGGTATGTACAATAAGGAGGAAAATCCCCGCGTGCCAATCATAGTCACAGGAAATGACTTCTCCACTTTGTATGCCCCTCTCATTCGTGATGGGCGTATGGAGAAGTTCTATTGGGCTCCAACTCGAGATGATCGTATTGGTGTTTGCATTGGAATCTTCAAAAGTGACAATGTTCCCGATGAGGATGTTGTCAAGATTGTTGACACCTTCCCTGGCCAGTCTATTGATTTCTTTGGTGCTCTCAGAGCTCGAGTGTATGATGATGAAGTGAGGAAATGGATATCAGGGGTTGGAGTTGACATGATCGGGAAGAAGCTCGTCAACTCGAGAGAGGGTCCCCCAACTTNTGAGCAGCCAAAATGACACTCGAGAAGCTTCTCGAGTATGGTAATATGCTTG
>ES673186|Panax ginseng||dlyl_EST000313 cDNA library of yellow fruit Panax ginseng leaves at flower fruit stage stage Panax ginseng cDNA clone dlyl0_0073_E04, mRNA sequence.
GGGGACGAAGCTACCGCGAAGGCTATGAACTTAGAAATGGAGAGCAATTTGAAGAAATGACCTTAAATCTTTGTGTACTGACCCCTAATCGAACTGTTTGGGATTCAAAAGTGAACGAAATCATTTTATCTACTAATAATGGCCAAATTGGCGTATTACCGGATCACGCCTCTATTGCCACAGCTGTAGATATAGGTATTTTGAGAATACGCCTTAACGACCAATGGTTAACGATGGCTCTGATGGGTGGTTTTGCTAGAATAGGTAATAATGAGATCACTGTTTTAGTAAATGATGCGGAGAAGAGTAGTGACATCGATTCACAAGAAGCCCAGCAAACGCTTGAAATAGCGGAAGCTAATTTAAGAAAAGCTGAAGGAAAGAGACAAAAAATTGAGGCAAATTTAGCTCTCCGACGAGCTAGGACACGAGTAGAGACGATCAATGCGATTTCGGAACTAGTCGGTGTGCCCGAATAATCAAAAGAGGTTCGGTTTATACACCCGACTTTTTT
>ES673152|Panax ginseng||dlyl_EST000279 cDNA library of yellow fruit Panax ginseng leaves at flower fruit stage stage Panax ginseng cDNA clone dlyl0_0073_A07, mRNA sequence.
GGGTGATTCATTTAAATCAGATACACTTCCTTTCCAAATAAGATCAATACCCCAAGCACTACACTCAGATTTATCTAGATTTGTTGCTAAAATATCGGTATTAAACTCGAAACTCCCGGCGGACGGCCAGTGGCCCAAATAAACGAAAGAATCGGTTACATTTTTCCCATGATCTCCTCTTATAGATAGACCGATAAT
>ES673146|Panax ginseng||dlyl_EST000273 cDNA library of yellow fruit Panax ginseng leaves at flower fruit stage stage Panax ginseng cDNA clone dlyl0_000682, mRNA sequence.
GGGGGATGAGTCAAATGCTACCTGTGGGAAGCGTCTGGCCTCAATTGGCCTAGAGAACACTGAGGCTAACCGCCAGGCATACCGGACACTGCTTGTCTCTGCTCCTGGACTCTGAACTTAAATGCGATGAACCAATCTCCCAACCCATGGCATGTGTCCTTCTCATACGCCAGAGCCCTTCAGAACACTTGCCTCAAGACCTGGGGAGGAAGACCTGAGAACGTGAAGGCTGCTCAGGATGCTTTGCTTTTACGGGCAAGTGCAAACTCTCTTGCCCAGCTTGGAGAATACACTGGTAAAGGAGAGTCCGAGGAGGCCAAGAAAGAATTGTTCGTCAAAGGCT
>ES673123|Panax ginseng||dlyl_EST000250 cDNA library of yellow fruit Panax ginseng leaves at flower fruit stage stage Panax ginseng cDNA clone dlyl0_000607, mRNA sequence.
GGGGGGAGGAACCACTCAGTACACTGTCAACAACCAGATGGTGAATGCCACACTTATGAACATTGCCGATAACCCCACAAGTGTGCAGCTTCCCGGTATGTACAATAAGGAGGAAAATCCCCGCGTGCCAATCATAGTCACAGGAAATGACTTCTCCACTTTGTATGCCCCTCTCATTCGTGATGGGCGTATGGAGAAGTTCTATTGGGCTCCAACTCGAGATGATCGTATTGGTGTTTGCATTGGAATCTTCCAAAGTGACAATGTTCCCGATGAGGATGTTGTCAAGATTGTTGACACCTTCCCTGGCCCGTCTATTGATTTCTTTGGTGCTCTCAGAGCTCGAGTGTATGATGATGAAGTGAGGAAATGGATAT
>ES673060|Panax ginseng||dlyl_EST000187 cDNA library of yellow fruit Panax ginseng leaves at flower fruit stage stage Panax ginseng cDNA clone dlyl0_0005_A08, mRNA sequence.
GGGAATGTATTTTAATACAATTTTTAGGGATCAAATGGTATAGTTCATTTGTTGGTAGCTTGGAGGATTAAAAGCATGACTCTTGCTTTCCAATTAGCTGTTTTTGCATTAATTGCTACGTCATTAATCTTATTAATTGGCGTACCCGTTGTATTTGCTTCTCCTGATGGTTGGTCAAGTAACAAAAATGTTTTATTTTCCGGTACATCATTATGGATTGGATTAGTCTTTCTGGTGGGTATCCTTAATTCTCTTATCTCTTGAACCTATTCGTCCCAGATCCAAAACCCAAACGACCCCCCCCCCGAATTTTTCTCGGTTGTGAGACACAGCAAAATTCAATAAAAGTCCCCAAAATGC
>ES673041|Panax ginseng||dlyl_EST000168 cDNA library of yellow fruit Panax ginseng leaves at flower fruit stage stage Panax ginseng cDNA clone dlyl0_0004_G08, mRNA sequence.
GGGGCACCATGGGTCGTATGCACAGTCGAGGTAAGGGTATTTCAGCTTCAGCTCTGCCATACAAGAGGACCCCACCAAGTTGGCTGAAGATCACTCCTCAGGATGTTGATGATAACATTTGTAAGTTTGCGAAGAAGGGTCTAACACCTTCACAAATTGGTGTTATTCTTCGTGATTCTCATGGGATTGCTCAAGTGAAGAGCGTCACTGGTAGCAAGATTTTGCGTATACTCAAAGCCCACGGGCTTGCTCCTGAAATTCCTGAGGACCTGTACCACCTCATTAAGAAAGCTGTTGCAATTAGGAAGCATTTGGAGAGGAACAGGAAGGACAAGGATTCCAAGTTTAGGTTGATCCTTGTTGAGAGCAGGATTCACCGACTTGCTCGCTACTACAAGAAGACCAAGAAGCTTCCTCCTGTCTGGAAGTATGAATCCACCACTGCCAGCACACTTGTGGCGTAGAGGATATTTGGTAAGAAGTTGGGG
>ES673009|Panax ginseng||dlyl_EST000136 cDNA library of yellow fruit Panax ginseng leaves at flower fruit stage stage Panax ginseng cDNA clone dlyl0_0004_C05, mRNA sequence.
GGGGAGTGGGAGCTTAGTTTCCGTCTGGGTATGCGACCTTGGATTGCTGTTGCATATTCAGCTCCTGTTGCAGCTGCTGCTGCTGTTTTCTTGATCTACCCAATCGGTCAAGGAAGTTTTTCTGATGGTATGCCTCTAGGAATCTCTGGTACTTTCAATTTCATGATTGTATTCCAGGCTGAACACAACATCCTTATGCACCCATTTCACATGTTAGGCGTAGCTGGTGTATTCGGCGGCTCCCTATTCAGTGCTATGCATGGTTCCTTGGTAACTTCTAGTTTGATCAGGGAAACCACAGAAAATGAATCTGCTAATGAAGGTTACAGATTCGGG
>ES673005|Panax ginseng||dlyl_EST000132 cDNA library of yellow fruit Panax ginseng leaves at flower fruit stage stage Panax ginseng cDNA clone dlyl0_0004_B12, mRNA sequence.
GGGAGAAATCGAAGTATTTTGGCCCTCTCTCATAAGCCACTGCAGAAGTAGATTAAAAAAATTCTGGTAACTTATTGATTCGTCTAGTATCTAAATATATCATTCATTTATAAGTTTACTATATCGAAAATTTATGACGTTCAAAAATGTATAGATCCAATGTCACATTCAGTAAAGATTTATGATACATGTATAGGATGTACTCAATGTGTCCGAACCTGCCCCACCGATGTATTAGAAATGATACCTTGGGACGGATGTAAAGCTAAGCAAATTGCTTCTGCTCCAAGAACAGAGGACTGTGTCGGTTGTAAGAGATGTGAATCCGCCTGTCCAACCGATTTCTTGAGTGTTCGAGTTTCTTTATGGCATGAAACAACTCGCAGCATGGGTCTAGGTTATTGATATGTTGC
>ES672983|Panax ginseng||dlyl_EST000109 cDNA library of yellow fruit Panax ginseng leaves at flower fruit stage stage Panax ginseng cDNA clone dlyl0_0002_G08, mRNA sequence.
GGGGGAGAGAACGTGATTTTGGTCAACTAAGCAGAAGAAGAAAAAACAACTCATACTTTTTTAGTGAGAGAAAGTGAATTTGGTGATAAAGTTTTAGAGAGAGAAATGGGAGGAGAGAATAACTGGAGCATCGGATCAAAGTCATGTGAATCGTGCAAATCGGCCCCGGCGACTCTGTTCTGCCGTGCCGACTTGGCCTTTCTCTGCACGGGCTGCGACGGAAAGATCCACGCCGCGAACAAACTCGCGTCGCGGCACGCGCGTGTGTGGCTGTGCGAGGTGTGCGATCAAGCTCCGGCCAGCGTCACGTGCAAGGCGGACGCCGCCGCGCTCTGCGTCACGTGCGACCGTGATATCCACTCCGCCAACCCCCTCGCCCGCCGTCACGAGCGGTTCCCCGTCGTTCCGTTTTATGACTCCGCCGCGGCGGCCAAATCAGCCACAGTCCACGGCAGAGATGACCGCTACTTTTCTGATCCGGAGGTGGAGGAGGAGGCCGAGGCTGCGTCGTGGCTACTCCCG
>ES672934|Panax ginseng||dlyl_EST00059 cDNA library of yellow fruit Panax ginseng leaves at flower fruit stage stage Panax ginseng cDNA clone dlyl0_0002_A05, mRNA sequence.
GGGGGTAGGCAACAGTGAGGAGAAATTTGGTACTCACTCCCAAAGTCCAGATCTGTTGGAATTCGAATCTGATTCGCTCTCTTCCTTTTCCCATCTCTCTATTTCATCGGAAAAATCAAAACCAGAAAAAGAAGAATAAGATGTTTCTCCTCGATTGGTTCTATGGCGTGTTAGCCTCGCTCGGATTATGGCAAAAAGAGGCTAAGATCTTGTTTCTAGGGCTCGATAATGCCGGCAAAACTACTTTGCTTCACATGCTCAAAGACGAGAGATTAGTTCAGCATCAACCGACACAGCATCCGACGTCGGAGGAGCTGAGTATTGGGAAAATCAAGTGTAAAGCTTTTGATTTGGGAGGTCATCAGATTGCCCGCAGAGTCTGGAAGGATTACTATGCCAAGGTTGATGCGGTTGTTTATCTTGTGGATGCCTATGACAAGGAGCGTGTCGCTGAATCAAAAAAGGAGTGGGATGCTCTCCTTTCTGACG
>ES672882|Panax ginseng||dlyl_EST00007 cDNA library of yellow fruit Panax ginseng leaves at flower fruit stage stage Panax ginseng cDNA clone dlyl0_0001_A10, mRNA sequence.
GGAATTGATCGTGATTTTGAACCTGTTCTTTCCATGACCCCTCTTAATTGAGACAGGAAATCCAATACTTGAAGTAGAAATCACTTTGATTCCATCATATTGGAATCAGGTCATACTTAAAAAAAGTAAATTTTTTCAACTCATTTATATCTAATCTTTTTTCTGGCTTGGCTAGGTGGGATAGCCGAGCCACTACCCTTTCGTTATGATCCTGTCCGGGCAAAATC
>ES672877|Panax ginseng||dlyl_EST00002 cDNA library of yellow fruit Panax ginseng leaves at flower fruit stage stage Panax ginseng cDNA clone dlyl0_0001_A03, mRNA sequence.
GGGGTTTTTACTGGTTCTCCAGGGAAATATGTTGGTTTAGCAGAAACAATTAGGGGGTTTCAATTGATCCTTTCCGGAGAATTAGATGGTCTTCCTGAACAGGCCTTTTATTTGGTAGGTAACATCGACGAAGCTACCGCGAAGGCTATGAACTTAGAAATGGAGAGCAATTTGAAGAAATGACCTTAAATCTTTGTGTACTGACCCCTAATCGAACTGTTTGGGATTCAAAAGTGAACGAAATCATTTTATCTACTAATAATGGCCAAATTGGCGTATTACCGGATCACGCCTCTATTGCTACAGCTGTAGATATAGGTATTTTGAGAATACGCCTTAACGACCAATGGTTAACGATGGCTCTGATGGGTGGTTTTGCTAGAATAGGTAATAATGAGATCACTGTTTTAGTAAATGATGCGGAGAAGAGTAGTGACATCGA
>ES554993|Panax ginseng||EST000437 cDNA library of red fruit Panax ginseng leaves at fruit ripening stage Panax ginseng cDNA clone WSW_05_91, mRNA sequence.
GGGGTCAAAAATTTGTATCCATTTTTCGTGATATTATGCATGGATCAGATATATCATGGCGAATTCTTCAGAAAAAATTGTGTCTTCTACAATGGAAATGGAATCTGATAAGTGAGATTTCGAGTAAGTGTTTCCATAATCTTCTTCTGTCCGAAGAAAGGATTCATCGAAATAATGAGTCGCCATTGATATCGACACATCTGAGATCGCCAAATGTTCGGGAGTTCCTCTATTCAATCCTTTTCCTTCTTCTTGTTGCTGGATATCTCGTTTGTACACATCTTCTCTTTGTTTCCTGGGCCTCTAGTGAGTTACAGACAGAGTTTGAAAAGGTCAAATCTTTGATGATTCCATCATCTATGATTGAGTTGCGAAAACTTCTGGATAGGTATCCTACATCTGAACCGAATTCTTTCTGGTTAAAGAATCTCTTTCTAGTTGCTCTGGAACAATTAGGAGATTCTCTAGAAGAAATACGGGGTTCTGCTTCTGGCGGCAACATGCTATTGGGTGGTGATCCCGCTTATGGGGTCAAATCAATACGTTCTAAGAAGAAATATTTGAATATCAATCTCATCGATATCATCGATCTCATAAGTATCATACCAAATCCCATCAATCGAATCACTTTTTCGAGAAATACGAGACATCTAAGTCATACAAGTAAAGAGATCTATTCATTGAT
>ES554978|Panax ginseng||EST000422 cDNA library of red fruit Panax ginseng leaves at fruit ripening stage Panax ginseng cDNA clone WSW_05_75, mRNA sequence.
GGGGTTACAAAGAACTTCAGGACATTATAGCTATCCTTGGGTTGGACGAATTATCCGAAGAGGATCGTTTAACCGTAGCAAGAGCGCGAAAAATTGAGCGTTTCTTATCACAACCCTTTTTCGTAGCAGAAGTTTTTACTGGTTCTCCAGGGAAATATGTTGGTTTAGCAGAAACAATTAGGGGGTTTCAATTGATCCTTTCCGGAGAATTAGATGGTCTTCCTGAACAGGCCTTTTATTTGGTAGGTAACATCGACGAAGCTACCGCGAAGGCTATGAACTTAGAAATGGAGAGCAATTTGAAGAAATGACCTTAAATCTTTGTGTACTGACCCCTAATCGAACTGTTTGGGATTCAAAAGTGAACGAAATCATTTTATCTACTAATAATGGCCAAATTGGCGTATTACCGGATCACGCCTCTATTGCCACAGCTGTAGATATAGGTATTTTGAGAATACGCCTTAACGACCAATGGTTAACGATGGCTCTGATGGGTGGTTTTGCTAGAATAGGTAATAATGAGATCACTGTTTTAGTAAATGATGCGGAGAAGAGTAGTGACATCGATTCACAAGAAGCCCAGCAAACGCTTGAAATAGCGGAAGCTAATTTAAGAAAAGCTGAAGGANAGAGACAAAAAATTGAGGCAAATTTAGCTCTCCGACGAGCTAGGACACGAGTAGAGACGATCAATGCGATTTCGGAACTAGTCGGTGTGCCCGAATAAT
>ES554947|Panax ginseng||EST000391 cDNA library of red fruit Panax ginseng leaves at fruit ripening stage Panax ginseng cDNA clone WSW_05_43, mRNA sequence.
GGGGTTCGTAGGTCATTTGTGGCACGCGGGAAGGGCTCGTGCAGCTGCAGCAGGGTTTGAAAAAGGAATTGATCGTGATTTTGAACCTGTTCTTTCCATGACCCCTCTTAATTGAGACAGGAAATCCAATACTTGAAGTAGAAATCACTTTGATTCCATCATATTGGAATCAGGTCATACTTAAAAAAAGTAAATTTTTTCAACTCATTTATATCTAATCTTTTTTCTGGCTTGGCTAGGTGGGATAGCCGAGCCACTACCCTTTCGTTATAATCCTGTCCGGGCAAAACCAATAAAGAAAAATCTATTCAACGAGCAAAAAAAGGAGAGAGAGGGATTCGAACCCTCGATAGTTCTTTGTTCAAAACTATGCCGGTTTTCAAGACCGGAGCTATCAACCACTCAGCCATCTCTCCGAAAGACAATTTTTATTTTATTCCTCCGAATAGAACATGGCTATATGAGTCGATATAACACTACTATCTGTAGAAAGATCTCGGGTGTGAATCTACTGGTCGATCTATACGTATATATAGATAGAAGTATGATCCAGCATGCCCATTTGTAAAATAAAAAAATTCCGTTTTCCCCCGACTCCATGTATGAATAAAGTGGTAATGCTAATAATAAGGGGTAGTAATAAGTCATATAAAATCAATAGATTTATGGTAAAATCCCTGTATGATGTAATGTATTTTAATACAATTTTTAAGGATCAAATGGTATAGTTCATTTGTTGGTA
>ES554933|Panax ginseng||EST000377 cDNA library of red fruit Panax ginseng leaves at fruit ripening stage Panax ginseng cDNA clone WSW_05_29, mRNA sequence.
GGGGATGGGGCATCCAATATTTTCATTTTCACCATTGGCCATACACACGCGGAATTTATTAGCTGAACCGAGATGCACGCTGGTGGTACAGATACCTGGATGGAGCGGGTTATCAAATGCAAGGGTCACAATTTTTGGCGACGTCTTTCCTCTTCCAGAAGACCAGCAGGAATGGGCTCATAAGCAGTACATAGCAAAGCACCATCAAGGGCCTTCACAGCAGTGGGGGAACTTTTACTACTTTAGGATGCAGAATATAAGTGATATATATTTCATTGGTGGGTTTGGCACCGTTGCCTGGGTTGATGTCAAAGAATACGAGACCCTTCGACCTGATAAGATTGCGGTTGATGGAGGTGAGCAAAATCTGAAGGAACTCAACGTAATCTTTTCAAAGCCCTTAAAAGAACTCCTGTCTTTGGAGACTGAGGTGGACGATGTTGCTCTCATTTCAATAGACAGCAAGGGAACAGATATCCGTGTTCGGCAAGGCGCACAGTTCAACATACAGAGAATACCATTCGAAGACGGGCATGGCATTGAAACACTTGAAGAAGCCAAGGCAGCACTTTGGCAACTAATAAACAGAGGCCGAGTTTACAATTTGCAGAAGTAGAAGTTGAATTGCTCCTCCTTTAGTATCTTCAAAGACTGCAACATCTAATGGTACTCTTGGCATTTGAGATATGGCCCTCCTTTGAAATTGTAATCACATGCATTCCCGTG
>ES554921|Panax ginseng||EST000365 cDNA library of red fruit Panax ginseng leaves at fruit ripening stage Panax ginseng cDNA clone WSW_05_16, mRNA sequence.
GGGTATATTATTTACTATATTGATTGCAGCGAAATCTTTCATAATTGGATTTCAAGTTAGTAACTTCTATTTTTTCCTTCCTTTCTTCTTCTTCGTTTCAGATCGAAAATAGAAGAGTTGAGTAAATCAAAAATCAAAAAAGAAAAAGGAGGTTCATGGCCAAGGGGAAGGATGTCCGAATAACCGTTATTTTGGAATGTACCAGTTGTGTTCGAAACGGTGTTAATAAGGTATCAACGGGTATTTCCAGATATATTACTC
>ES554920|Panax ginseng||EST000364 cDNA library of red fruit Panax ginseng leaves at fruit ripening stage Panax ginseng cDNA clone WSW_05_15, mRNA sequence.
GGGGTGGAAAGGGTGGACAATTAGCTAGAGCAGCGGGTGCTGTAGCGAAACTGATTGCAAAAGAGGGGAAATCGGCCACATTAAAATTACCTTCTGGGGAGGTCCGCTTGATATCCAAAAACTGCTCAGCAACGGTCGGACAAGTGGGGAATGTTGGGGTGAACCAGAAAAGTTTGGGTAGAGCCGGATCTAAGCGTTGGCTAGGTAAGCGTCCTGTAGTAAGAGGAGTAGTTATGAACCCTGTAGACCATCCCCATGGGGGTGGTGAAGGGAGGGCCCCAATTGGGAGAAAAAAACCCACAACCCCTTGGGGTTATCCTGCACTTGGGAGAAGAAGTAGAAAAAGGAATAAATATAGTGATAATTTGATTCTTCGTCGCCGTAGTAAGTAGGAGAGAAAATAGAATTTATTTCTTCGTCTTTACAAAAAAAATAGGAGTAAGCTGTGACACGTTCACTAAAAAAAAATCCTTTTGTAGCAAATCGTTTATTAAGAAAAATTGATAAGCTTAACACAAAAGCAT
>ES554918|Panax ginseng||EST000362 cDNA library of red fruit Panax ginseng leaves at fruit ripening stage Panax ginseng cDNA clone WSW_05_13, mRNA sequence.
GGGCAGTGGAAGGTTTTCTGCGTTCAGTCAATCTACGCAGAGTGAATCGGTCCCTAAGGAAACCCCGAAAGGGCTGCCGTCCGATGGGTACACGAAAGTGACGAAGTTGCTTTGACTACAGAACCATGCCTGTCTGTTGGAGCGAATTGGATGATCGGGCCGAGGGCTGCCCCCTCTTCCCCTCACTCTCCTTTCCCTAATATGAACCTTGAGTCATCAAAGCCTTTCTGACTCGGCCTGGCCCGGTCGCCCTACGCGACTGGCAACTGTTGTCATAGTCAACAAGGTTGAAACTTCCAGGAAAAAAACTTCGAATTGGGAGGGCGATCCTCCCGGTGAACTGACCGTACCCCAAACCGACACAGGTGAACAAGTAGAGTATACTAGGGCGCTTGAGAGAACCATGTCGAAGGAACTCGGCAAAATGACCCCGTAACTTCGGGAGAAGGGGTGCTCTCCTATCTTTTGATTAGGAAAGCGGCACATACCAGGGGGTAGCGACTGTTTATTAAAAACACAGGACTCCGCTAAGTGGTAACACGATGTATAGAGTCTGACACCTGCCCGGTGCTGGAAGGTCGGAAGGAGAAGTGTTATAAGCTTTGAATGGAAGCCCCGGTAAACGGCGGCAGTAACTCTAACTGTCCTAAGGTAGCGAAATTCCTTGTCGCATAAGTAGCGACCTGCACGAATGGTGTAACGACTGCCCCGCTGTCTCCGACATGGACCCGGTGAAATTGAATTCTCCGTG
>ES554894|Panax ginseng||EST000338 cDNA library of red fruit Panax ginseng leaves at fruit ripening stage Panax ginseng cDNA clone WSW_04_82, mRNA sequence.
GGGGCTTATGGAATTGTTGATCTTGTAGCGGTTGAGTGAAAATAGCCCGGATTTCGCGTAAATCCGCGATTTCAGATTTTCTCTTTTTGTCGAATTTAATAGAATATTAATTAATAGAATATTAAATAGAAGTAAAGTAATTCATAATCATCCGGTTAGGATCCATCTAAACCAGCCCATTATTTATATGATTCAACATGCCAACCATTAAACAACTTATTAGAAATACAAGACGGCCAATCAGAAATGTCACAAAATCCCCCGCGCTTCGGGGATGCCCCCAGCGTCGAGGAACATGTACTAGGGTGTATGTGCGACTCGTTCAGATCATGAGCTGAGACAAAAGAAAGAAAACTTTTTCCAGTATCAATGATCCGTACCGGCGAATAGGATAGAATAGAAAAAGAACTCTATTCAATTCAGTATCC
>ES554892|Panax ginseng||EST000336 cDNA library of red fruit Panax ginseng leaves at fruit ripening stage Panax ginseng cDNA clone WSW_04_80, mRNA sequence.
GGGCACGAAAGTGACGAAGTTGCTTTGACTACAGAACCATGCCTGTCTGTTGGAGCGAATTGGATGATCGGGCCGAGGGCTGCCCCCTCTTCCCCTCACTCTCCTTTCCCTAATATGAACCTTGAGTCATCAAAGCCTTTCTGACTCGGCCTGGCCCGGTCGCCCTACGCGACTGGCAACTGTTGTCATAGTCAACAAGGTTGAAACTTCCAGGAAAAAACTTCGAATTGGGAGGGCGATCCTCCTGGTGAACTGACCGTACCCCAAACCGACACAGGTGAACAAGTAGAGTATACTAGGGCGCTTGAGAGAACCATGTCGAAGGAACTCGGCAAAATGACCCCGTAACTTCGGGAGAAGGGGTGCTCTCCTATCTTTTGATTAGGAAAGCGGCACATACCAGGGGGTAGCGACTGTTTATTAAAAACACAGGACTCCGCTAAGTGGTAACACGATGTATAGAGTCTGACACCTGCCCGGTGCTGGAAGGTCGGAAGGAGAAGTGTTATAAGCTTTGAATGGAAGCCCCGGTAAACGGCGGCAGTAACTCTAACTGTCCTAAGGTAGCGAAATTCCTTGTCGCATAAGTAGCGACCTGCACGAATGGTGTAACGACTGCCCCGCTGTCTCCGACATGGACCCGGTGAAATTGAATTCTCCGTGAAGATGCGGAGTACCAACGGCTAGACGGTAAGACCCCGTGCACCTTAACTATAGCTTCGCAGTGACAACCTTGATCGAATGTGTA
>ES554888|Panax ginseng||EST000332 cDNA library of red fruit Panax ginseng leaves at fruit ripening stage Panax ginseng cDNA clone WSW_04_76, mRNA sequence.
TTTTGTTTATTTTTATTTGTGATCATCTCCCGGATAAAGAAAGGGCAAGAGTCAAAAAGGGGTGATTCAAATCAAGATTTCTCTGGTACCCTATATTAGAAAATTATAAAGAAAGATCAAATCACAAAAAGAAAAATACAGTCGAAAGACACCAAAGCAATGGTGTATCAGACTACTTGTCTTCTTGTAGTTGGATCTCCCAGTTTTTGGAATGCTCCAAATTCTACTTGAGCATCCAAATCTGGATCAATACCAGCAAAAACATCTCTGAACAAGGTTCTAGCACCATGCCAAATATGTCC
>ES554878|Panax ginseng||EST000322 cDNA library of red fruit Panax ginseng leaves at fruit ripening stage Panax ginseng cDNA clone WSW_04_65, mRNA sequence.
GGGGACGAAGCTACCGCGAAGGCTATGAACTTAGAAATGGAGAGCAATTTGAAGAAATGACCTTAAATCTTTGTGTACTGACCCCTAATCGAACTGTTTGGGATTCAAAAGTGAACGAAATCATTTTATCTACTAATAATGGCCAAATTGGCGTATTACCGGATCGCGCCTCTATTGCCACAGCTGTAGATATAGGTATTTTGAGAATACGCCTTAACGACCAATGGTTAACGATGGCTCTGATGGGTGGTTTTGCTAGAATAGGTAATAATGAGATCACTGTTTTAGTAAATGATGCGGAGAAGAGTAGTGACATCGATTCACAAGAAGCCCAGCAAACGCTTGAAATAGCGGAAGCTAATTTAAG
>ES554877|Panax ginseng||EST000321 cDNA library of red fruit Panax ginseng leaves at fruit ripening stage Panax ginseng cDNA clone WSW_04_64, mRNA sequence.
GGGCAAGAAGTTCTGGAAGCCTATAAAATTTTCTTATAGTTGGTTGCAAGGAGTCGTAATTTCGGTTCAAGTCGAAAGTGCTTGTGTTGGGAATGAAGGTGCAAGGGGGAAAGAAAAAGTGGCAGGTGTTAGGAATGACGAACAGAAAATCGTGAATGAAAAACAAAAGCGTGACGAAAATGATAAAAAATTTTAGGATGTTAGAAGGTGCAAAATTAATAGGTGCCGGAGCTGCTACAATTGCTTTAGCGGGAGCTGCTGTCGGTATTGGAAACGTTTTTAGTTCCTTGATTCATTCCGTGGCGCGAAATCCATCATTGGCTAAACAATTATTTGGTTATGCCATTTTGGGCTTTGCTCTAACCGAAGCTATTGCATTGTTTGCCCTAATGATGGCCTTTTTGATCTTATTCGTATTCTAATCGAAGGTTGAAGCCCCTCCCGTGCCTTACCGTGAAATAACCTTTCTCGGTATGGGGGTGTAGTCTTGTTGTGCGCGGGGATCGTCAATAAGAACGAGGCCCGCCCCTGAAATGGGGCGGGGAAGGAGAAGTGGGAAGTGGGTCTCCTTCGCCGG
>ES554866|Panax ginseng||EST000310 cDNA library of red fruit Panax ginseng leaves at fruit ripening stage Panax ginseng cDNA clone WSW_04_50, mRNA sequence.
GGGTTACAAGTCATTTTCAGATGTAATTGAAGGCAAAGAGGGAAGATTTCGTGAGACTCTGCTTGGCAAACGGGTCGATTATTCAGGGCGTTCCGTCATTGTCGTGGGTCCGTCACTTTCATTACATCGATGTGGATTGCCCCGCGAAATAGCTATAGAGCTTTTCCAGACATTTGTAATTCGTGGTCTAATTAGACAACATCTTGCTTCGAACATAGGAGTTGCTAAGAGTAAAATTCGGGAAAAAGAACCGATTGTATGGGAAATACTTCAGGAAGTTATGCAGGGGCATCCCGTATTGCTAAATAGAGCGCCGACTCTGCATAGATTAGGCATACAGGCATTCCAGCCTGTTTTAGTGGAAGGTCGTGCTATTTGTTTACATCCATTAGTTTGTAAAGGATTCAATGCAGACTTTGACGGGGATCAAATGGCTGTTCATGTGCCTTTATCTTTGGAGGCTCAGGCAGAAGCACGTTTACTTATGTTTTCTCATATGAACCTTTTGTCTCCAGCTATTGGGGATCCTATTTCCGTACCAACTCAAGATATGCTTATTGGACTCTATGTCTTAACGAGCGGGAATCGTCGGGGTATTTGTGTAAATAGGTATAATCCATGTAATCGCAGAAACTATCAAAATGAAAGAATTTACGATAATAACTATAAGTATAC
>ES554839|Panax ginseng||EST000283 cDNA library of red fruit Panax ginseng leaves at fruit ripening stage Panax ginseng cDNA clone WSW_04_21, mRNA sequence.
GGGGCAAGCGCCATAGTTATGGCACCAATTCCGACCAGCACGGGGTTGTTAAAACCCCTGGTGGAAAATTGGTGTATCAGACCACAAAGAAGAGAGCAAGTGGACCCAAGTGCCCTGTTACTGGAAAGAGAATTCAAGGGATTCCCCACTTGAGACCTGCTGAGTACTAAAGGTCTAGATTATCTAGGAACAGAAGGACTGTGAACCGTGCCTTTGGCGGTGTATTATCTGGAGGATTATTCGAGCCTTCTTGGTGGAAGAGCAAAAGATTGTGAAGAAGGTTTTGAAGATTCAAAAGGCAAAAGAAAAGGTGGCAGCAAAGAGCTAAGCTGGATTAGTGAAGAAGCTTGAGTTTGAATGTAGTTGAAAGAAATTTTGAGTTTAAAACAGATATTAAAAGTTGTGCACTATGTTACTATTATGTGATTGTTTTATGGAATTGAATGAGCATTTTTCTTTAGGTGGTTGAGATCTTTCATTTTGACAAATTTCAAGCAATTTCTGTGACTATATTTACAGCAGTAGTGACGAATTTGTC
>ES554798|Panax ginseng||EST000242 cDNA library of red fruit Panax ginseng leaves at fruit ripening stage Panax ginseng cDNA clone WSW_03_73, mRNA sequence.
GGGGGGCTTTGGTGGTATTTATCATGCACTTCTAGGGCCTGAGACGCTTGAAGAATCTTTTCCATTCTTCGGTTATGTATGGAAAGATAGAAGTAAAATGACTACAATTTTAGGTATTCACTTAATCTTATTAGGTATAGGTGCTTTTCTTCTAGTATTCAAGGCTCTTTATTTTGGTGGCGTATATGATACCTGGGCTCCGGGGGGGGGAGATGTAAGAAAAATTACCAACTTGACCCTTAGCCCAAGTATTATATTTGGTTATTTACTAAAATCGCCCTTTGGAGGGGGAGGATGGATTGTTAGTGTAGATGATTTGGAAGATATAATCGGAGGACATGTATGGTTAGGTTCCATTTGTATACTTGGTGGAATCTGGCATATCTTAACCAAACCCTTCGCATGGGCTCGACGCGCACTTGTGTGGTCTGGGGAGGCTTACTTATCTTATAGTTTAGGGGCTTTATCCGTCTTTGGTTTCATTGCTTGTTGTTTTGTCTGGTTCAATAATACCGCCTATCCTAGCGAGTTTTACGGACCCACTGGACCAGAAGCTTCCCAAGCTCAAGCGTTTACTTTTCTAGTTAGAGACCAACGCCTTGGGGCTAACGTGGGATCCGCTCAAGGACCTACTGGTTTAGGTAAATATTTAATGCGTTCC
>ES554779|Panax ginseng||EST000223 cDNA library of red fruit Panax ginseng leaves at fruit ripening stage Panax ginseng cDNA clone WSW_03_53, mRNA sequence.
GGGGAGGGAGATCTTTCATATCTTTCGAGATCCACCCTACAATATGGAGTAAAAAAAGCCAAAATAAGTGATTTTAGCCCTTATAAAAAGAAAACTGATTCTTGAACCCCTTTCACGCTCATGTCACGTCGAGGTACTGCAGAAGAAAAAAACTGCAAAATCCGATCCAATTTATCGTAATCGGTTAGTTAACATGTTGGTTAACCGTATTCTGAAACACGGAAAAAAAATCATTGGCTTATCAAATTATCTATCGAGCCGTGAAAAAGATTCAACAAAAGACAGAAACAAATCCACTATCTGTTTTACGTCAAGCAATACGTGGAGTAACTCCCGATATAGCAGTAAAAGCAAGACGTGTAGGTGGATCGACTCATCAAGTTCCCATTGAAATAGGATCCACACAAGGAAAAGCACTTGCCATTCGTTGGTTATTAGCGGCATCCCGAAAACGTCCGGGTCGAAATATGGCTTTCAAATTAAGTTCCGAATTAGTGGATGCTGCCAAAGGGAGTGGCGATGCCATACGG
>ES554776|Panax ginseng||EST000220 cDNA library of red fruit Panax ginseng leaves at fruit ripening stage Panax ginseng cDNA clone WSW_03_49, mRNA sequence.
GGGGAGGATCGTTTAACCGTAGCAAGAGCGCGAAAAATTGAGCGTTTCTTATCACAACCCTTTTTCGTAGCAGAAGTTTTTACTGGTTCTCCAGGGAAATATGTTGGTTTAGCAGAAACAATTAGGGGGTTTCAATTGATCCTTTCCGGAGAATTAGATGGTCTTCCTGAACAGGCCTTTTATTTGGTAGGTAACATCGACGAAGCTACCGCGAAGGCTATGAACTTAGAAATGGAGAGCAATTTGAAGAAATGACCTTAAATCTTTGTGTACTGACCCCTAATCGAACTGTTTGGGATTCAAAAGTGAACGAAATCATTTTATCTACTAATAATGGCCAAATTGGCGTATTACCGGATCACGCCTCTATTGCCACAGCTGTAGATATAGGTATTTTGAGAATACGCCTTAACGACCAATGGTTAACGATGGCTCTGATGGGTGGTTTTGCTAGAATAGGTAGTAATGAGATCACTGTTTTAGTAAATGATGCGGAGAAGAGTAGTGACATCGATTCACAAGAAGCCCAGCAAACGCTTGAAATAGCGGAAGCTAATTTAAGAAAAGCTGAAGGAAAGAGACAAAAAATTGAGGCAAATTTAGCTCTCCGACGAGCTAGGACACGAGTAGAGACGATCAATGCGATTTCGGAACTAGTCGGTGTGCCCGAATAATCAAAAGAGGTTCGGTTTATACACCCGACTTTTTTG
>ES554753|Panax ginseng||EST000197 cDNA library of red fruit Panax ginseng leaves at fruit ripening stage Panax ginseng cDNA clone WSW_03_24, mRNA sequence.
GAGGGTCGCCGTGTCTCGCTCGTCGGAGGTCTGTATCAAGAGGGGGAAAGTTCAGATCTGCTGTTTACACAACCTATACTCCGCCGCTGCTAAATTTCTCTCTCCGCTTTAGAGTATGGAGACCTTCCTATTTACCTCTGAATCTGTTAACGAGGGTCACCCAGACAAGCTTTGTGATCAGATCTCCGATGCGGTGCTTGATGCCTGCCTAGCCCAGGACCCCGACAGCAAGGTTGCCTGTGAGACTTGCACCAAGACCAACATGGTCATGGTCTTTGGGGAGATTACTACCAAGGCCGATGTAGACTACGAAAAGATTGTCCGTGAGACATGCCGTACCATTGGATTTGTTTCTGATGATGTGGGTCTTGACGCTGACAACTGCAAGGTCCTTGTAAACATTGAGCAGCAGAGCCCTGATATTGCCCAGGGTGTCCACGGCCACCTTACAAAGCGCCCAGAGGAGATCGGTGCAGGTGACCAGGGCCATATGTTTGGCTATGCCACTGATGAAACCCCTGAACTTATGCCTCTGAGCCATGTCCTTGCAACCAAACTTGGGGCTCGCCTGACTGAGGTTCGAAAGAACGGTACCTGCGCCTGGCTGAGACCTGATGGTAAGACTCAAGTCACTGTTGAGTATTATAACGAGAATGGTGCGATGGTTCCAATTCGTGTTCATACTGTCCTTATCT
>ES554745|Panax ginseng||EST000189 cDNA library of red fruit Panax ginseng leaves at fruit ripening stage Panax ginseng cDNA clone WSW_03_16, mRNA sequence.
GGGGGTATACAAAGTCAACAGATCTCAATGAATACAATAGGATTTATGGCTACACAAACTGTTGAGAACGGTTCTAGATCTCGTCCAAAACCAACTACTGTAGGGAATTTATTGAAACCATTGAATTCGGAATATGGTAAAGTAGCACCTGGATGGGGAACGACTCCTTTGATGGGTGTCGCAATGGCCCTATTTGCGATATTTCTATCTATTATTTTGGAGATTTATAATTCTTCCGTTTTATTGGATGAAATTTCAATGAATTAGATCTATAAGAACCTCAAAGTCCTAGCTTTTTTTCAATAAAAAAAAGAATCATTTAGATCGTGTATTTCTAGCCCAGCCCATTCTATTTTGGTAGTTCGACCGCGGAATTTCTTTGTTTCTGTATTTCTGGAATATGAGTGTGTGACTTGTTATAATTGATCCTATTGATAGTACAGTGAACGGGTCTGTCATCTTGATAGAGGTGGTTCTACTCCGTCGGATATTTATTCTAGTATCCGGAACACGGAATATATGAAATAGATTAAGAAATAGTTGAACTATGATTCATACTTAATATTCAGACCTCGCGGCCGGACTCCAAAAAATTTTCAAAGAATTAGAATTTGTAAATCGAAAGAAAGGTTTGTCTTCTTTCAAATTTCTGTTTATGCTTATTTTGACTAAAAATGAACCTTTCTTTCGATTTATAGTCATTATATCTATTCGTGGAATAAGTGATGATCCAAAGGTTCTTACTCAGG
>ES554740|Panax ginseng||EST000184 cDNA library of red fruit Panax ginseng leaves at fruit ripening stage Panax ginseng cDNA clone WSW_03_10, mRNA sequence.
GGGGAGGATCGTTTAACCGTAGCAAGAGCGCGAAAAATTGAGCGTTTCTTATCACAACCCTTTTTCGTAGCAGAAGTTTTTACTGGTTCTCCAGGGAAATATGTTGGTTTAGCAGAAACAATTAGGGGGTTTCAATTGATCCTTTCCGGAGAATTAGATGGTCTTCCTGAACAGGCCTTTTATTTGGTAGGTAACATCGACGAAGCTACCGCGAAGGCTATGAACTTAGAAATGGAGAGCAATTTGAAGAAATGACCTTAAATCTTTGTGTACTGACCCCTAATCGAACTGTTTGGGATTCAAAAGTGAACGAAATCATTTTATCTACTAATAATGGCCAAATTGGCGTATTACCGGATCACGCCTCTATTGCCACAGCTGTAGATATAGGTATTTTGAGAATACGCCTTAACGACCAATGGTTAACGATGGCTCTGATGGGTGGTTTTGCTAGAATAGGTAATAATGAGATCACTGTTTTAGTAAATGATGCGGAGAAGAGTAGTGACATCGATTCACAAGAAGCCCAGCAAACGCTTGAAATAGCGGAAGCTAATTTAAGAAAAGCTGAAGGAAAGAGACAAAAAATTGAGGCAAATTTAGCTCTCCGACGAGCTAGGACACGAGTAGAGACGATCAATGCGATTTCGGAACTAGTCGGTGTGCCCGAATAATCAAAAGAGG
>ES554670|Panax ginseng||EST000114 cDNA library of red fruit Panax ginseng leaves at fruit ripening stage Panax ginseng cDNA clone WSW_02_29, mRNA sequence.
GGGGCACACCTTTGGCCAATTTGATTCGTTGGAGAGATAAACCGGTGGCCCTTTCCATTGTGCAAGCACGATTGGTTGGATTAGCCCACTTTTCTGTAGGTTATATATTCACTTATGCGGCTTTCTTGATTGCCTCTACATCAGGCAAATTTGGTTAATTTTTTTAATGTCTTGGATTCGCGATAATCTCATTTCTTTCGATGGAGAAGAGGTGCGCCTTCTTATATTTCTACATCTAGGATTCGACTTGTATCATGGATACTAATAGGAACTGAACCATTATGGCAAGGAAAAGTTTGATTCAGAGGGAGAAGAAGAGGCAAAAATTGGAACAGAAATATCATTCGATTCGCCGATCCGC
>ES554652|Panax ginseng||EST00096 cDNA library of red fruit Panax ginseng leaves at fruit ripening stage Panax ginseng cDNA clone WSW_02_11, mRNA sequence.
GGGGACGCTTGAAGAATCTTTTCCATTCTTCGGTTATGTATGGAAAGATAGAAATAAAATGACTACAATTTTAGGTATTCACTTAATCTTATTAGGTATAGGTGCTTTTCTTCTAGTATTCAAGGCTCTTTATTTTGGTGGCGTATATGATACCTGGGCTCCGGGGGGGGGAGATGTAAGAAAAATTACCAACTTGACCCTTAGCCCAAGTATTATATTTGGTTATTTACTAAAATCGCCCTTTGGAGGGGAAGGATGGATTGTTAGTGTAGATGATTTGGAAGATATAATCGGAGGACATGTATGGTTAGGTTCCATTTGTATACTTGGTGGAATCTGGCATATCTTAACCAAACCCTTCGCATGGGCTCGACGCGCACTTGTGTGGTCTGGGGAGGCTTACTTATCTTATAGTTTAGGGGCTTTATCCGTCTTTGGTTTCATTGCTTGTTGTTTTGTCTGGTTCAATAATACCGCCTATCCTAGCGAGTTTTACGGACCCCCTGGACCAGAGGCTTCCCAAGCTCCTAGCTTTACTTTTCTTGTTAGAGACCACCGACTTGGGGCTAAA
>ES554622|Panax ginseng||EST00066 cDNA library of red fruit Panax ginseng leaves at fruit ripening stage Panax ginseng cDNA clone WSW_01_72, mRNA sequence.
GGGGGTTTCATTGCTTGTTGTTTTGTCTGGTTCAATAATACCGCCTATCCTAGCGAGTTTTACGGACCCACTGGACCAGAAGCTTCCCAAGCTCAAGCATTTACTTTTCTAGTTAGGGACCAACGCCTTGGGGCTAACGTGGGATCCGCTCAAGGACCTACTGGTTTAGGTAAATATTTAATGCGTTCCCCGACCGGAGAAGTCATTTTTGGAGGAGAAACTATGCGTTTTTGGGATCTGCGTGCCCCTTGGTTAGAACCTCTAAGGGGTCCAAATGGGTTGGACTTGAGTAGGCTGAAAAAAGACCTACAACCTTGGCAAGAACGGCGTTCTGCAGAATATATGACCCATGCTCCTTTAGGTTCTTTAAATTCTGTGGGTGGCGTAGCTACCGAGATCAATGCAGTCAATTATGTCTCTCCTAGAAGTTGGTTAGCTACTTCTCATTTTGTTCTAGGATTCTTCTTGTTCGTAGGTCATTTGTGGCACGCGGGAAGGGCTCGTGCAGCTGCAGCAGGGTTTGAAAAAGGAATTGATCGTGATTTTGAACCTGTTCTTTCCATGACCCCTCTTAATTGAGACAGGAAATCCAATACTTGAAGTAGAAATCACTTTGATTCCATCATATTGGAATCAGGTCATACTTAAAAAAAGTAAATTTTTTCAACTCATTTATATCTAATCTTTTTTCTGGCTTGGCTAGGTGGGATAGC
>ES554618|Panax ginseng||EST00062 cDNA library of red fruit Panax ginseng leaves at fruit ripening stage Panax ginseng cDNA clone WSW_01_68, mRNA sequence.
GGGAAGAATGCATTGGATGGATGCCCGGGCATTGAGAAGGAAGGACGCTTTCAGAGGCGAAAGGCCATGGGGAGATACCGTCTGTGATCCATGGATCTCCGATCGGGAAACCGTATCCAAGCTCCGTGGCTAGTCTGCGCCCTTTGGACTTTTCAAACTTAGCGAACTGAAACATCTGAGTAGCTAAAGGAAGGGAAATCAACCGAGACTCCGTTAGTAGCGGCGAGCGAGAGCGGATTGGGGGTTTGAGG
>ES554607|Panax ginseng||EST00051 cDNA library of red fruit Panax ginseng leaves at fruit ripening stage Panax ginseng cDNA clone WSW_01_57, mRNA sequence.
GGGGAACCCTCGATAGTTCTTTGTTCAAAACTATGCCGGTTTTCAAGACCGGAGCTATCAACCACTCAGCCATCTCTCCGAAAGACAATTTTTATTTTATTCCTCCGAATAGAACATGGCTATATGAGTCGATATAACACTACTATCTGTAGAAAGATCTCGGGTGTGAATCTACTGGTCGATCTATACGTATATATAGATAGAAGTATGATCCAGCATGCCCATTTGTAAAATAAAAAAATTCCGTTTTCCCCCGACTCCATGTATGAATAAAGTGGTAATGTTAATAATAAGGGGTAGTAATAAGTCATATAAAATCAATAGATTTATGGTAAAATCCCTGTATGATGTAATGTATTTTAATACAATTTTTAGGGATCAAATGGTATAGTTCATTTGTTGGTAGCTTGGAGGATTAAAAGCATGACTCTTGCTTTCCAATTAGCTGTTTTTGCATTAATTGCTACGTCATTAATCTTATTAATTGGCGTACCCGTTGTATTTGCTTCTCCTGATGGTTGGTCAAGTAACAAAAATGTTTTATTTTCCGGTACATCATTATGGATTGGATTAGTCTTTCTGGTGGGTATCCTTAATTCTCTTATCTCTTGAACCTATTCGTCCCAGATCCAAAACCCAAACGACCCCCCCCCCGAATTTTTCTCGGTTGTGAGACACAGCAAAATTCAATAAAAGTCCCCAAAAT
>ES554583|Panax ginseng||EST00027 cDNA library of red fruit Panax ginseng leaves at fruit ripening stage Panax ginseng cDNA clone WSW_01_29, mRNA sequence.
GGGGCCGGGTGACCGAGTGAAGATGGTAGTTGAGCTTATTGTTCCGGTTGCGTGTGAGCAAGGGATGAGGTTTGCTATCAGAGAAGGAGGGAAGACTGTTGGAGCTGGTGTTATTAATGCCATTATTGAGTGATAGTCTTCTTCGGGTGATCTGCACTTTTGAGTGATTCAAAGTTTTAACTCTTTTTTGTTTTTGCGAAATTAGTTTTACCCCTTTATTCCTTAAAACATTCTGAATCCGTTGTCATATATGCCGCAATCATCACGTTACTTCTCTTAAATGTGTTGGTTCCTTAGTTTAGTTGGACAATATTCTTCTGATGATGAATCACTTTGATGTTACTTAC
>ES554581|Panax ginseng||EST00025 cDNA library of red fruit Panax ginseng leaves at fruit ripening stage Panax ginseng cDNA clone WSW_01_27, mRNA sequence.
GGGGATTGGCATTCCATTGCTGTCATTTTATATGTATATGGTTACAATTATCTACGCTCCCAATGCGCCTATGATGTAGCACCAGGTGGACTGTTAGCTAGTGTGTATCATCTTACGAGAATAGAGTATGGCGTGGATCAACCAGAAGAGGTATGCATAAAAGTATTTGCCCCGAGGAGGAATCCTCGAATTCCGTCTGTTTTCTGGGTTTGGAAAAGTGTGGATTTTCAAGAACGGGAATCTTATGATATGTTGGGAATCCTTTATGCTACTCATCCACGTTTGAAACGCATCTTAATGCCTGAAAGTTGGGTAGGATGGCCTTTACGTAAGGATTATATTGCCCCCAATTTTTATGAAATACAAGATGCTCATTGAATGATTAGAAACTAATCTTTAGTTCTACAATTCCAGAGATTCAAGGTTCTGTTCTAGATTAACCAGAGTAATTGAAGTCTCATTTGTATTATGGATAGGCTAACAACAAATTTGCCTTTCGAATATGTATATACGTATGAAGTAGTAACTTTATTTTTGAACGAGAGGG
>ES554569|Panax ginseng||EST00013 cDNA library of red fruit Panax ginseng leaves at fruit ripening stage Panax ginseng cDNA clone WSW_01_13, mRNA sequence.
GGGGGGGCTCATGTAGCCCATGCCGGATTAATTGTATTCTGGGCCGGAGGAATGAACCTATTTGAAGTGGCTCATTTCGTACCAGAGAAGCCTATGTATGAACAAGGATTAATTTTACTTCCCCACCTAGCTACTCTAGGTTGGGGGGTAGGTCCTGGTGGGGAAGTTATAGACACTTTTCCATACTTTGTATCTGGAGTACTTCATTTAATTTCCTCTGCAGTATTGGGCTTTGGTGGTATTTATCATGCACTTCTAGGGCCTGAGACGCTTGAAGAATCTTTTCCATTCTTCGGTTATGTATGGAAAGATAGCAATAAAATGACTACAATTTTAGGTATTCACTTAATCTTATTAGGTATAGGTGCTTTTCTTCTAGTATTCAAGGCTCTTTATTTTGGTGGCGTATATGATACCTNGGGCTCCGGGGGGGGGGAGATGTAAGAAAAATTACCAACTTGACCCTTAGCCCAAGTATTATATTTGGTTATTTACTAAAATCGCCCTTTGGAGGGGAAGGATGGATTGTTAGTGTAGATGATTTGGAAGATATAATCGGAGGACATGTATGGTTAGGTTCCATTTGTATACTTGGTGGAATCTGGCATATCTTAACCAAACCCTTCGCATGGGCTCGACGCGCACTTGTGTGGTCTGGGGAGGCTTACTTATCTTATAG
>ES554558|Panax ginseng||EST00002 cDNA library of red fruit Panax ginseng leaves at fruit ripening stage Panax ginseng cDNA clone WSW_01_02, mRNA sequence.
GGGTACCCAATCTGGGAAGCGGCATCCGTTGACGAATGGTTATACAACGGTGGTCCTTATGAACTAATCGTTCTACACTTTTTACTTGGTGTAGCTTGTCACATGGGTCGTGAGTGGGAGCTTAGTTTCCGTCTGGGTATGCGACCTTGGATTGCTGTTGCATATTCAGCTCCTGTTGCAGCTGCTGCTGCTGTTTTCTTGATCTACCCAATCGGTCAAGGAAGTTTTTCTGATGGTATGCCTCTAGGAATCTCTGGTACTTTCAATTTCATGATTGTATTCCAGGCTGAACACAACATCCTTATGCACCCATTTCACATGTTAGGCGTAGCTGGTGTATTCGGCGGCTCCCTATTCAGTGCTATGCATGGTTCCTTGGTAACTTCTAGTTTGATCAGGGAAACCACAGAAAATGAATCTGCTAATGAAGGTTACAGATTCGGG
>ES437654|Panax ginseng||R6L0023 cDNA expression library of Panax ginseng leaf Panax ginseng cDNA clone R6LC23 3', mRNA sequence.
TTTTTTTTTTTTTTTTCAGGCATGCTGGATCATACTTCTATCTATATATACGTATAGATCGACCAGTAGGTTCACACCCGAGATCTTTCTACAGATAGTAGTGTTATATCGACTCATATAGCCATGTTCTATTCGGAGGAATAAAATAAAAATTGTCTTTCGGAGAGATGGCTGAGTGGTTGATAGCTCCGGTCTTGAAAACCGGCATAGTTTTGAACAAAGAACTATCGAGGGTTCGAATCCCTCTCTCTCCTTTTTTTGCTCGTTGAATAAATTTTTCTTTATTGGTTTTGCCCGGACAGGATCATAACGAAAGGGTAGTGGCTCGGCTATCCCACCTAGCCAAGCCAGAAAAAAGATTAAATATAAATGAGTTGAAAAAATTTACTTTTTTTAAGTATGACCTGATTCCAATATGATGGAATCAAAGTGATTTCTACTTCAAGTATTGGATTTCCTGTCTCAATTAAGAGGGGTCATGGAAAGAACAGGTTCAAAATCACGATCAATTCCTTTTTCAAACCCTGCTGCAGCTGCACGAGCCCTTCCCGCGTGCCACAAATGACCTACGAACAAGAAGAATCCTAGAACAAAATGAGAAGTAGCTAACCAACTTCTAGGAGAGACATAATTGACTGCATTGATCTCGGTA
>EC599983|Panax notoginseng||PNSSH3G-1217 panax notoginseng subtracted cDNA libraries Panax notoginseng cDNA 5' similar to Panax ginseng chloroplast, mRNA sequence.
TTTTTTTTTTTTTTTTTTTTTTTTTTGAACGTGTCACAGCTTACTCCTATTTTTTTTGTAAAGACGAAGAAATAAATTCTATTTTCTCTCCTATTTACTACGGCGACGAAGAATCAAATTATCACTATATTTATTCCTTTTTCTACTTCTTCTCCCAAGTGCAGGATAACCCCAAGGGGTTGTGGGTTTTTTTTCTCCCAATTGGGGCCCTCCCTTCACCACCCCCATGGGGATGGTCTACAGGGTTCATAACTACTCCTCTTACTACAGGACGCTTACCTAGCCAACGCTTAGATCCGGCTCTACCCAAACTTTTCTGGTTCACCCCAACATTCCCCACTTGTCCGACCGTTGCTGAGCAGTTTTTGGATATCAAACGGACCTCCCCAGAAGGTAATTTTAATGTGGCCGATTTCCCCTCTTTTGCAGTCAGTTTCGCTACAGCACCCGCTGCTCTAGCTAATTGTCCACCCTTTCCACGTGTGATTTCTATGTTATGTATGGCCGTGCCTAAGGGCATATCGGTTGAAGTAGATTCTTCTTTTTGATCAATCAAAACCCCTTCCCAAACTGT
>EC599981|Panax notoginseng||PNSSH3G-1287 panax notoginseng subtracted cDNA libraries Panax notoginseng cDNA 5' similar to Panax ginseng chloroplast, mRNA sequence.
ACTGCATGGTTCCACTCTGCAAGAACTCCGAATCATTCTCTTGAAGCTCATCCTCTTCATCATAAAGGATCTGCTTGCCCCGAAATGACCTGGACCAATAGGGAAATCCCAATTCATTGGGCCTTTCGATACAATCAAATAGAAAGCCCCAAGGGCGCCATATTCTAGGAGCCCAAACTATGTGATTAAATAAATCCTCCTCTATCTGTTGCGGGTCGAGGGCTCCTTCTCCTTCCCCTTCTTCAAACTCCGATTCGTTTTTTTCATAGAGAAATCTCTGATCAAGGATAGAACAAGATCCATTTTGCATCATATCTAAGGGATTCCTTGGTTCGGGCCGAAGAAGCAATGTCACTCGATCATTATCAAACTGACTGCAATCTTTTTCTGTCCGCGAGGATCCCACCAGAGCGCCTTCTACCTCTAATAGGCCATGAACTAGATCAGAATCATTCTCAACGAGTCCATAAGAAGTGATCCCATTTTTTTTCATCGGGTCGGGGTAGAGACCAAAGATCTTGAGCGACCGATCCGGCAGAACAACTCAAAAGATAAAGAAGTATCGTTAATTTCTTCATGCTCGTTCCAAGTTCGAAGT
>EB691167|Nicotiana langsdorffii x sanderae||NecGex_177F09 Ornamental tobacco (LxS8) Stage 6 Floral nectary cDNA library Nicotiana langsdorffii x Nicotiana sanderae cDNA clone NecGEx_Clone 177F09 similar to homologue to GP|2653637|gb| NADH-dehydrogenase subunit 2 {Panax ginseng, mRNA sequence.
GGGTCGAGCTACTGAGCCTCTGAGGTTAGAGGTAATCCAATTGAAAGCTGAAGCACAGAAGTTAACTGCTGTACAAAAAGAATTATCTGCCCAAGTTCAAACTCTTACAAAGGATTCTAACCGACTACAAACTGAGAATAAGCAATTATCAGCTATAAAGACTGATATTGATAAAATGCGCAAAGAGTTGACGGAAGCAAGGAGACAATTTGAATATGAGAAGAAAGCAAATACAGAACTGGTGGAACAAAATCAATCTATGGAGAAGAATCTCATTTCAATGGCTCGTGAAATAGAAAAGCTGCGAGCAGAGAAAGTTGGACGGGGCCTTGGTGTAGGAGCGTATGGCGTGATGAGTGGAAGTCCTGAGATGAGATATCCTGGTGGTGCATATGGTGATCCGTACAGTGCTGGTGGTTGGGGTTCCTATGACAATCGTGGCCCTCCCCGACGTTGAGTCCCATAGCTAATGTGACAGCTCTTGAAGATAAATGTAATGTGAGGTTTTCTTCCTATTTAGAATGTAACTTAAGCCCTCATGAAACAAATATGCTCTGAAACCAAGATTTGCCGATTGAACCTTGAGATTGAGAAAACATCTTTATGATCTCGGCTTATGATTCAATTGCCATGTATTTAGCTATTGAGCCTCAAAGTTTATGTTTTTA
>DW360020|Prosopis juliflora||PJ835 Prosopis juliflora leaf cDNA library Prosopis juliflora cDNA similar to ribosomal protein L33 [Panax ginseng], mRNA sequence.
TTCTTTTGAGTAATATATCTGGAAATACCCGTTGATTTCTTATTAACATTGTTTCGAACACAACTGGTACATTCCAAAATAACCCCTATTCGGATATCTTTACCTTTGGCCATGAACCTCCTTTGTGTTTTTGATTCACTTAACTCTTCTATTTTACGATTCGAAGCGAAAAGGAACGAAAAATAAAATAATAGAAGTTGCTAACTCGAAATCCAATTATGAAGGATCTCGTTCCAATCAATAATCAATATAGTCAATATAGTATAAGTATAGTAATTATAAGTATAGTAATAATTAAGTAATACAATGATTTCTAACTATATTTAGAATCACAGCACAGTACAGTATTTCTATTTTCATTTAAGTATCCTGTATGATATTCTTGCCCCGCCTTACCCATTCCATTTCTATTTCTGGTCTCACCCTATTATTTAATATTTAATAGAGTAATAGAAATGGAATTGATTATTAATTGAATTTTTGGAATTTCCTTATTAATTAAAATTCAATTCAAGGCCTGGACCCAAATTCCGAGTTTCACTGAGGCCGAATCCAACTTTATCCTTTC
>DV556463|Panax ginseng||DC05034E01 Panax ginseng cDNA library Panax ginseng cDNA, mRNA sequence.
CTTATACTGTTTTTATAGGCCAGCGTCGCCATTGTGTTGGTACCCGGGAATTCGGCCATTACGGCCGGGGACTGGGAATAATTTAGTTAGCTTTGAAACAAAAGGCAGCAATGGCATCTCTAGCAACCTTTGCTGCTGTTCAGCCCATCACCGTTCAGGGCCTTGGTGCTCGAAGTTCACTTACTGGGACTAAGCTCCACATCAAGCCATCTCGCCAGAGTTTGAGATCCACCAATTGCAAGACTGGTGCTGTTGTGGCCAAATATGGTGAAAAGAGTGTCTACTTTGATTTGGAGGATTTGGGCAACACCACCGGGCAGTGGGACTTGTATGGATCTGATGCACCTTCACCATACAACCCTCTTCAGAGCAAGTTCTTTGAGACATTTGCCGCTCCCTTCACTAAGAGAGGCCTTTTGCTCAAATTCTTGATACTGGGAGGTGGTTCCACCCTTGCTTATCTAAGCTCAACAGCCTCAGGGGATGTTCTACCAATCAAGAAAGGACCACAACTTCCACCAAAGCTTGGTCCACGTGGAAAAATCTAATTTTTCTAGATCCTACATCCTTCAAACTCATGGTTGTGTTTAAATGTATCTTCCTTTGTAAGTATGTTTGGATCCCAACTAAGACCCCTTAATTATTTTGAAGCGTTGGTTATGTCATTTGGGGCATTCTTGGTAACTTGATGCTATTCTGATAACCCGATTAATATATTAGACCTGTTAGTTTTTTTCTTAAAAAAAAAACACCTACATATGTTTACTACATGTCCGCCCCCCTTGGCC
>DV556404|Panax ginseng||DC05033H02 Panax ginseng cDNA library Panax ginseng cDNA, mRNA sequence.
CCTCCCCCGAAATTGGGTTTTTTAAAGCGNAAGTTGCGCCATTGTGTTGGTACCCCGGGNAATTCGGCCATTACGGCCGGGGGTTTGTTTTCCGTTAGGAGCCGCAATAAAACCACAGAAAGCTCGCCATGGGAAGAAGACCTGCAAGGTGTTATCGCCAGATCAAGAACAAGCCTTATCCAAAGTCTCGGTACTGCCGTGGTGTGCCAGATCCAAAGATTAGGATTTATGATGTTGGAATGAAAAAAAAAGGTGTTGATGAATTTCCGTTCTGTGTTCATTTGGTCAGTTGGGAAAAGGAGAATGTTTCTAGCGAGGCTTTGGAAGCTGCCCGTATTGCTTGTAACAAGTACATGACCAAGTTTGCTGGCAAGGATGCTTTCCATTTGAGGGTCAGGGTTCACCCTTTCCATGTGCTTCGTATCAACAAGATGTTGTCATGTGCTGGGGCTGATAGGCTCCAGACAGGCATGAGGGGAGCTTTTGGTAAGCCTCAGGGAACCTGTGCCCGGGTCAGCATTGGCCAGGTGCTCCTCTCAGTCCGTTGCAGAGACTCGAACAGCCATCATGCTCAGGAGGCATTGCGTCGTGCAAAGTTCAAGTTCCCTGGTCGTCAAAAGATAATAGTCAGCAGGAAATGGGGCTTCACCAAATTTAGCCGTACTGACTATGTGAAGTGGAAGGCCGAAAACCGCATTCTTCCAGATGGTGTTAATGCGAAGCTTCTGGGATGCCATGGACCTCTTGCACGTCGT
>DV556383|Panax ginseng||DC05033F05 Panax ginseng cDNA library Panax ginseng cDNA, mRNA sequence.
CCTCCCCCGATATTGGTTTTTAAACCCAACTCGCCATGTGTTGGTACCCGGGNAATTTGCCATTACGGCCGGGGGAGCGAGAGACGGGAGAGAGAAAGGAAAAATGGGGGGAGGAATGGAAGCAAACAAGAACAAGTGGATAGAGGAATGGGGTTCGGCTCGAGAGAATCTGGAACACAACTTCCGGTGGACCCGCCGCAATTTTGCTCTCGTCGGCATTTTCGGCATCGCACTCCCCGTCTTGGTCTACAAGGGCATCGTCAAAGAATTCCATATGCAAGATGAAGATGCAGGCAGGCCCTACAGGAAGTTCCTGTGAGTGTTTTGTAATTTCCATTAATAATTGTGGGTGCAGTAAAACTGGGTTTCTTACAGTCCACAAAGTATGCTTTTTCCCACTTTGGGGAAGTCGCCTTCTTATTCACTCTGTAACTTGGTTGCCATTTTCAACTGTACTTTTATATTAATTTGTTTTGTTTGAAGGTCCCANNAAAAAAAAAAAAAAAAAAAAAAAAAAAAAAAAAAAATTTTTTTTAAAAAAAAAAAAAAAAAAAAAAAAAACCTTGTTGGGCCGCCTTGGGCCACAGTCAATTTTAAACTCGACCAAGCTTATGCATGCGGCCGAAATTCGAGCTCACTTGGCCAATTCGCCCTATAGGGAGTCGTATTACAATTCACGTGGCCGGCGTTTAACCAACGTCGGGACTGGGAAAAACCCTTGGCGTTACCCAATTTAATTCGCCTTGCAAGCACATCCCCCTT
>DV556335|Panax ginseng||DC05033B05 Panax ginseng cDNA library Panax ginseng cDNA, mRNA sequence.
CCCTCCCCCCGAAAATGNGGTTTTTAATCCGGTATTGCGCCATTGTGNTTGGTACCCCGGGNAATTCGGCCATTACGGCCGGGGACCCACCAACCAACAAACCAAGAAATCAGAAAATGGCGGCCACTAGAGTGATAGTATCAGCAAGCAGCGCTGCCACATCCTCTTTCTTATTCAGAGGGCCATTGCTAAAACCTCAACAAAGTCTCAGCCTTTGCTTCAATAACAAAAATGGAAGATTATTATTAGCATCCAACAAGAAGAGATTTTTCAGTTGCAGAGCGCTTTACAAACCCGATGTTCTGACTACAGAGGAAGGCCAGCCTGAAACACTTGATTACAGAGTCTTCTTCCTTGACAATTCCGGTAAAAAGGTTTCCCCTTGGCATGATATACCATTACAATTGGGTGATGGCGTTTTCAATTTTATTGTTGAGATTCCTAAAGAATCAAGTGCGAAAATGGAGGTTGCTACTGATGAACCATTCACTCCCATCAAACAAGATACAAAAAAAGGAAAACTTCGTTATTATCCGTACAATATAAATTGGAATTATGGCTTGCTTCCACAAACATGGGAAGACCCATCGTTAGCAAACCCTGAAGTTGAGGGGGCATTTGGAGATAATGATCCAGTTGATGTTGTTGAGATTGGTGAAACTCGTGGAAAAACTGGCCAAATTTTGAAGGTTAAGCCCTTGGGTGCTTTAGCTATGATTGATGAGGGAGAACTCG
>DV556325|Panax ginseng||DC05033A07 Panax ginseng cDNA library Panax ginseng cDNA, mRNA sequence.
CTTTCCCCGAAATTGGGTTTTTTATGCCCAATTCGCCTTGTGTTGGTACCCGGGAATTCGGCCATTACGGCCGGGGACCGACACACAAAGTCAAACACAGTCTATCTAGCTACTCCGATTTAGAAAAAATGGCACCGATTGCAGTTGGTGACTCGCTTCCCGATGGAACCCTCGCTTTCTTCGACGCCGAAGATCAGTTGCAACAGGTCTCTGTTCACTCTCTCGCCGCCGGTAAGAAGGTCGTCCTCTTCGGTGTTCCCGGTGCGTTCACTCCCACTTGCAGCGTGAAGCATGTACCCGGATTCATTGAGAAGGCTGAGGAGTTTAAGGCCAAGGGCGTTGATGAAATTCTGTTGATCAGTGTTAATGATCCATTTGTGATGAAGGCATGGGCAAAAACTTACACGGACACAAAGTTCGTCAAGTTTTTGGCAGATGGTTCAGCAAAATACACCCATGCTCTTGGCCTAGAGCTTGACCTCTCGGAGAAGGGGCTTGGCACCCGCTCTCGCAGGTTTGCCTTGCTTGTGGATGACCTCAAGGTGAAGACTGCCAATATTGAAACTGGGGGAGAATTCACTGTCTCAGGCTCGGAGGATCTCCTCAAGACTCTTTAATTTTCTCAGTTTCTTGCAATCAAGTATTAGTCTCATGACTATTTGATCAGTATCTTAATAATTTTGTTCTTCAAATACCTTGATACTTGTTTTTGAAATGTGGTTGGACTATGAAAGTCAAATAGTAATG
>DV556313|Panax ginseng||DC05032H07 Panax ginseng cDNA library Panax ginseng cDNA, mRNA sequence.
GTTTTTTTTTTTTTATAGGGAAAGCGCGCCATTGTGTTGGTACCCGGGAATTCGGCCATTACGGCCGGGGGGGAATAATTTAGTTAGCTTTGAAACAAAAGGCAGCAATGGCATCTCTAGCAACCTTTGCTGCTGTTCAGCCCATCACCGTTCAGGGCCTTGGTGCTCGAAGTTCACTTACTGGGACTAAGCTCCACATCAAGCCATCTCGCCAGAGTTTGAGATCCACCAATTGCAAGACTGGTGCTGTTGTGGCCAAATATGGTGAAAAGAGTGTCTACTTTGATTTGGAGGATTTGGGCAACACCACCGGGCAGTGGGACTTGTATGGATCTGATGCACCTTCACCATACAACCCTCTTCAGAGCAAGTTCTTTGAGACATTTGCCGCTCCCTTCACTAAGAGAGGCCTTTTGCTCAAATTCTTGATACTGGGAGGTGGTTCCACCCTTGCTTATCTAAGCTCAACAGCCTCAGGGGATGTTCTACCAATCAAGAAAGGACCACAACTTCCACCAAAGCTTGGTCCACGTGGAAAAATCTAATTTTTCTAGATCCTACATCCTTCAAACTCATGGTTGTGTTTAAATGTATCTTCCTTTGTAAGTATGTTTGGATCCCAACTAAGACCCCTTAATTATTTTGAAGTGTTGTTTATGTCATTTGGGGCATTCTTGTTAACTTGATGCTATTCTGATAACCTGATTAATATATTAGACCTGTTAGTTTTTATTTATCGAAAAAACAACAACACACCCCCCCCCCACCCT
>DV556302|Panax ginseng||DC05032G08 Panax ginseng cDNA library Panax ginseng cDNA, mRNA sequence.
ATTTTGTTTTTTTTATAGGCAAAGCGCGCCATTGTGTTGGTACCCGGNGAATTCGGCCATTACGGCCGGGGGTGGGAATTTGGAAGTAGAAGTTTAGTTTTGAAGCTAAAAGGGACAGGCAGTCACCAGTCCAATGGCATCTCTAGCAACCTTTGCTGCTGTTCAACCCATCACCGTTAAGGGCCTTGGTGGAAGCTCACTTACCGGAACTAAGCTCCACATCAAGCCAGCTCGCCAGACTTTGAGACCCACCAATTTCAAAGCTGGTGCTGTGGTGGCAAAATATGGTGAAAAGAGTGTGTACTTTGATTTGGAGGATTTGGGCAACACCACTGGCCAATGGGACTTGTATGGTTCCGATGCTCCTTCACCATACAACCCTCTTCAGAGCAAGTTCTTTGAGACATTTGCCGCTCCCTTCACAAAGAGAGGTCTTTTGCTCAAATTCTTGATATTGGGAGGTGGTTCCACCCTTGCTTATCTAAGCTCCACAGCCTCGGGGGATATTCTACCAATCAAGAAGGGCCCACAACTTCCTCCAAAGCTTGGTCCACGTGGAAAAATCTAATTCATTCTAGCTCCTACATCCTTCAACCTCTTGATTGTGTTTAAAATGTATCTTCCCTACACCTTGTAAGTATGTTGGATCCCATCTAAGACCCCTCTGATTATTTCAATATGTTTGTATCGGGATCCAAAAAAAAAAAATCCCGAAAAAGAACAAACCATTGTCGGCCCGCCTGCGGCCCAATTTGATTCTTAGACTTGAGGCAAGT
>DV556288|Panax ginseng||DC05032F06 Panax ginseng cDNA library Panax ginseng cDNA, mRNA sequence.
TTTTTCTTGTGTTTTTTACACGGGAAAGCGCGCCATTGTGTTGGTACCCGGGAATTCGGCCATTACGGCCGGGGAAACAAGAATTACACAGAAATAAAGATATGATGGATCTCTCTTAGATTTTATCAGATCTCTCCCTATTTTCTCTCTTTCCTATTTGTTGAAAGGAAGAGAAATTATCCCGATTATAATTCATAAGAATAAGAAAAAATGTCAACGTCGGCGAGGAAAAGACTGATGAGGGATTTCAAGAGGTTGCAGCAAGATCCTCCGGCCGGTATCAGTGGTGCTCCTCAAGACATTAACATCATGTTGTGGAATGCTGTCATTTTTGGGCCTGATGATACTCCTTGGGATGGAGGTACGTTTAAGCTGACTCTGCAATTCTCAGAGGATTACCCAAATAAACCACCAGTAGTACGATTCGTCTCAAGGATGTTTCATCCCAACATTTATGCAGATGGAAGTATATGCTTGGATATTTTACAGAATCAGTGGAGTCCTATATATGATGTTGCAGCTATACTTACCTCTATCCAGTCATTGCTTTGTGATCCAAACCCAAACTCCCCTGCAAATTCTGAAGCAGCTCGTATGTTCAGTGAAAATAAGCGCGATTACAACCGAAGAGTGCGTGAAGTAGTTGAGCAGAGCTGGACAGCTGACTAAATCTCAAAATGAGTGCAACCCTTGTCTATGGTTGAACCGATAATAGGCAGAAGGGTGGGGGGTGTTGGTACTAGTGTTCATGTACTTGATAATTCTATG
>DV556267|Panax ginseng||DC05032D09 Panax ginseng cDNA library Panax ginseng cDNA, mRNA sequence.
GGGGGGGGGGGGGGNNNNNCCCCCCCCCGAAAACACCCGACATTTTTTTTTTTTTTAGGCAAACGCGCCTTGTGTTGGTACCCGGGATTCGGCCTTACGGCCGGAAGCAAACCCAATTAGCCACGTGGCAAGCTTAGGACCCATGCAAACAGATCAAGTTATCCATCCATAACCAGAGTATACAATATACCCAATTCAATTCAATTGCTTAGTGGGAATTTGGAAGTAGAAGTTTAGTTTTGAAGCTAAAAGGGACAGGCAGTCACCAGTCCAATGGCATCTCTAGCAACCTTTGCTGCTGTTCAACCCATCACCGTTAAGGGCCTTGGTGGAAGCTCACTTACCGGAACTAAGCTCCACATCAAGCCAGCTCGCCAGACTTTGAGACCCACCAATTTCAAAGCTGGTGCTGTGGTGGCAAAATATGGTGAAAAGAGCGTGTACTTTGATTTGGAGGATTTGGGCAACACCACTGGCCAATGGGACTTGTATGGTTCCGATGCTCCTTCACCATACAACCCTCTTCAGAGCAAGTTCTTTGAGACATTTGCCGCTCCCTTCACAAAGAGAGGTCTTTTGCTCAAATACTTGATATTGGGAGGTGGTTCCACCCTTGCTTATCTAAACCTCCACAAGCCTCGGGGGGGATATTCCTACCCAAATCAAGGAAGGGGCGCAACAAACTTTACCTCACAAAGCCTTGGGTCCCACCGATGGCAAAAAAATCCTTAATTTCCATATCCTAAGACTTCCTCCACAATCCCCTTTCACAAACCCTTTTTTTGCATATAGATGTGTTATCAAAAAAAAGGTAGACTCCCTTCTCCCCA
>DV556263|Panax ginseng||DC05032D05 Panax ginseng cDNA library Panax ginseng cDNA, mRNA sequence.
CTTTTTTTTTTTTTACACGGCAAGCGCGCCATTGTGNTTGGTACCCCGGGAAATTCGGCCATTACGGCCGGGGAAGATTGACAGTTGGTGCAGGACTTGGATTTAGCAGTCTGCAAGGGACAAACGTGGATAAGGATCAAATCAAAGCCGCCATCAAGGCTCAACAGGACCAGCAGATAGATAATGCACTTCTAGCGGAAGGTCGCTTTTACTCGGATCTGGAGCTAACTGAGAAAGAAATGGAATGCATGGTGATGGAAGCCTCTAGGGCAGAGTATCTTGCTGATGATAAGTTCAAGCAGCAACTTGGTCATAGAGAATCCTCTACTTCTGCGGCTGGCGCTGAACCGTCATCATCTGGTGCCAGACCATCAGGAAGTGAAACCAAGGTGGAGCGTGGCTTTCCGGGTACTGTCCTCAGCAGTAGCATGCAGATGGTGCTGTCAATGGGTTTCAGCTATCTGCAGGCGCTCGAGGCATACAGCATATTTGGGGATGATGTTGATTCCATGGTCTGTTACTTATTGGAGACCAGCAGTAGTAGCAGACGCAAAGGTAAAGCAACTGAATGAGCAAATTTCGTAAGACTAGTGCGGGCGAATTAGCCTGATTTCAAATGTTGTCCTAGTCGAGGGAAAACAAAAATATGGGACCAGCAGAGTCCAGAATTCTGAATCTTTTTATTCGAATTAATAAGTAGTTATTAATATGCGTTGCTCTTAATTTATAATATTTCGAAATTTATCTGACCGAAAAAAATACAAATACACCTTATTAATTCCTACCCCCCTCCCCCG
>DV556207|Panax ginseng||DC05031G09 Panax ginseng cDNA library Panax ginseng cDNA, mRNA sequence.
TTTTTCTGTTTTCAGGCAGCGTGCATTGTGTTGGTACCCGGGAATTCGGCCATTACGNGCCGGGGNGCTCTCAAAAGAAGAAAACATGGCAGCAGAGATGGCTTTAGTGAAACCCATCTCCATCTCCAAAATTGGGAACCAAACAAGAACTCCATACACAAAATTCTTGAGAATTAGTATGTCAGCCACCAGCTCAAATCCCACCAGCAGCAGCACAAATGCATCAAAGAAGGGTAGCAAGAAAGGGATAAAGGAGTCGCTGCTGACACCAAGATTTTACACCACTGATTTTGATGAAATGGAGACCCTTTTCAACACTGATATCAACAACAATCTGAATGAGGCCGAGCTTGAGGCCCTGCTACAGGAATTCAAGACTGATTACAATCAGACCCATTTTGTGAGGAACAAGGAGTTCAAGGAGGCGGCTGATAAAATGCAAGGCCCAATGCGCCAAATCTTTGTGGAATTCTTGGAGAGGTCTTGCACTGCTGAGTTCTCTGGTTTCCTTCTCTATAAGGAGCTTGGAAGAAGACTCAAGAAAACTAATCCTGTGGTAGCTGAGATTTTCTCTCTCATGTCTAGGGATGAAGCCAGGCATNGCAGGGTTTTTGAACAAGGGTTTATCTGATTTCAACTTAGCATTGGACTTGGGATTCTTGACGAAGGCTAGAAAATACACATTTTTCAAGCCAAAGTTCATTTTCTATGCAACATATTTGTCTGAGAAAAATGGGTACTGGAGAACATAACCTTTTTCCGTCATCTCAAGTCCAATCCCGAGTC
>DV556199|Panax ginseng||DC05031G01 Panax ginseng cDNA library Panax ginseng cDNA, mRNA sequence.
TTATGCTGTTTTTCTCGCCNAGCTCGCCATTGTGTTGGTACCCGGGAATTCGGCCATTACGGCCGGGGGGAATAATTTAGTTAGCTTTGAAACAAAAGGCAGCAATGGCATCTCTAGCAACCTTTGCTGCTGTTCAGCCCATCACCGTTATGGGCCTTGGTGCTGGAAGTTCACTTACTGGGACTAAGCTCCACATCAAGCCATCTCGCCAGAGTTTGAGATCCGCCAATTGCAAGGCTGGTGCTGTTGTGGCCAAATATGGTGAAAAGAGTGTCTACTTTGATTTGGAGGATTTGGGCAACACCACCGGTCAGTGGGACTTGTATGGATCTGATGCACCTTCACCATACAACCCTCTTCAGAGCAAGTTCTTTGAGACATTTGCCGCTCCCTTCACTAAGAGAGGCCTTTTGCTCAAATTCTTGATACTGGGAGGTGGTTCCACCCTTGCTTATCTAAGCTCAACAGCCTCAGGGGATGTTCTACCAATCAAGAAGGGACCACAACTTCCACCAAAGCTTGGTCCACGTGGAAAAATCTAATTTTTCTAGATCCTACATCCTTCAAACTCGTGGTTGTGATTAAATGTATCTTCCTTTGTAAGTATGTTTGGATCCCAACTAAGACCCCTTAATTATTTTGAAGTGTTGTTTATGTCATTTGGGGCATTCTTGTTAACTTGATGCTATTCTGATAACCTGATTAATATATTAGACCTGTTAAGCNNNNAAANAAANNNNNNNNNNNAAAAAACATGT
>DV556197|Panax ginseng||DC05031F11 Panax ginseng cDNA library Panax ginseng cDNA, mRNA sequence.
GTTTTTCTGGTTTATCGGGCCGCGCTCATTGTGTTGGTACCCGGGAATTCGGCCATTACGGCCGGGGGTGGGAATTTGGAAGTAGAAGTTTAGTTTTGAAGCTAAAAGGGACAGGCAGTCACCAGTCCAATGGCATCTCTAGCAACCTTTGCTGCTGTTCAACCCATCACCGTTAAGGGCCTTGGTGGAAGCTCACTTACCGGAACTAAGCTCCACATCAAGCCAGCTCGCCAGACTTTGAGACCCACCAATTTCAAAGCTGGTGCTGTGGTGGCAAAATATGGTGAAAAGAGTGTGTACTTTGATTTGGAGGATTTGGGCAACACCACTGGCCAATGGGACTTGTATGGTTCCGATGCTCCTTCACCATACAACCCTCTTCAGAGCAAGTTCTTTGAGACATTTGCCGCTCCCTTCACAAAGAGAGGTCTTTTGCTCAAATTCTTGATATTGGGAGGTGGTTCCACCCTTGCTTATCTAAGCTCCACAGCCTCGGGGGATATTCTACCAATCAAGAAGGGCCCACAACTTCCTCCAAAGCTTGGTCCACGTGGAAAAATCTAATTCATTCTAGCTCCTACATCCTTCAACCTCTTGATTGTGTTTAAAATGTATCTTCCCTACAGCTTGTAAGTATGTTGGATCCCATCTAAGACCCCTCTGATTATTTCAATATGTTTGTATTGCGATTTGGGGGCATTCTTGTAAACTTTATGCTTGGCCTGTTGACTTTCNAAAAAAATAATATCTTCCTTCCTTTTTCCTTGTCGGCCGCCTTGGCCCAGTCGAC
>DV556150|Panax ginseng||DC05031B12 Panax ginseng cDNA library Panax ginseng cDNA, mRNA sequence.
TTTTTCTGTTTTTCTACGCCAGCGTTCCATTGTGTTGGTACCCGGGAATTCGGCCATTACGGCCGGGGATATACCCAATAGATATATACATAAATAGAGAGAGAGAGAGAGAGAGAGAGAGAGAATCTGGTGAGGGAAAATGGTTAGTAAAACAGAGGAAGCACAAGTGAACCGGTTGGAGAATCAGGTCGATAATGGCGGCGGAGGGGCTTGGGAGTTCCTCTCTCTTGTACAGAAGCTAAAGCTTCGACGCTCCGATAAGGTCTTAAAGCACGGATTATCGATTTTGAATGACTCCCAGAAGCGATCTGCTCTTGGTCCTGAAGAATGGACTCTATATGAACAGGTAGCAATTGCAGCTATGGACTGTCAATGCACTGATGTTGCTAAGGATTGCTTAAAGGTTTTACAAAAGAAGTTCCCAGAGAGCAAGAGGGTTGGTAGGTTAGAAGCAATGCTATTAGAAGCAAAGGGATCCTGGGCCGAGGCTGAAAAAGCATACTCAAGTCTTTTAGAGGATAATCCATTAGATCAGGTAATACTCAAGAGAAGGGCAGCTATGACAAAAGCTCAGGGAAACATTTCAGGGGCCATTGAAAGGCTCAATCAGTATCTTGAAACGTTCATGGCAGATCATGATGCCTGGAGGGAACTTGCTGAAATATATGTCTCCCTACAAATGTACAAGCAAGCAGTTTTCTGCTACGAGGAGTTAATATTATCTCAACCAATGATTCCTCTCTACCATCTAACTTATGCCTGATGTGCTATATACACTAAGGTGG
>DV556138|Panax ginseng||DC05031A12 Panax ginseng cDNA library Panax ginseng cDNA, mRNA sequence.
GTTCTCGTGTTTTATAGGCCAGCGTGCCATTGTGTTGGTACCCGGGAATTCGGCCATTACGGCCGGGCAACAAGGAATTGAATGATAAGAAAAGGTTGGCTACGAGTGGAGCAAACTTTGCTAGAGCATATACAGTTCAGTTTGGCACATGCACTTTCCCATATAACTTCACTGGCTGCCAAGATCTTGCCAAGCAAAAGAAAGTGCCATTTATTTCTGATGATTTGGAGTTGGAGTGCGAAGGAAAGGAAAAATACAAGTGTGGTTCCAATGTGTTCTGGAAATGGTGAAGAGTGTCAAAAATCTATGCTTCTTTACTCTCCTCCACCCATCATGTATCTATTTTTTTTTCAATTTGAAAACTTATGATACATTTGTTCTGTAAAAAAAAAAAAAAAAAAAAAAAAAAAAAAAAAAAAAAAAAACAAAAAAATAAAAAATAAATAAATGAAAAACAAAAAAAAAAAAAAGACGGGAAAAAAAAAAAAAAAATAAAAAAAAATATCTTTGGGGGCCCCCTGGCCCAATGCTATTTTAAACTTAACAAAGTTTTTCCTTGGGGCCAAATTTGGGGCTACTTGGCCAATTCCCCCTAAAGGGGGGCGGTTTAAAATTTAACGGCCCGGGGTTTACCAACGTGGGGATGGGAAAACCCTGGGGGTTCCCAAATTAAACCGCTTGGGAGAAATTCCCCTTTTGCCCAGTGGGGGAAAAACCAAAGGGCCCCCACCGAACCCCCTTTCCAAAATTTGGCCCCCCCCTGAAGGGGAATGGAAATTTGAAAGCGTTATATTTGTGGT
>DV556060|Panax ginseng||DC05030C06 Panax ginseng cDNA library Panax ginseng cDNA, mRNA sequence.
CTTTTCTTTTTTTTTACCCGCGAAAGCGCGCCATTGTGTTGGTACCCGGNGAATTCGGCCATTACGGCCGGGGAATTGCTAACTGGGAATAATTTAGTTAGCTTTGAAACAAAAGGCAGCAATGGCATCTCTAGCAACCTTTGCTGCTGTTCAGCCCATCACCGTTAAGGGCCTTGGTGCTGGAAGTTCACTTACTGGGACTAAGCTCCACATCAAGCCATCTCGCCAGAGTTTGAGATCCGCCAATTGCAAGGCTGGTGCTGTTGTGGCCAAATATGGTGAAAAGAGTGTCTACTTTGATTTGGAGGATTTGGGCAACACCACCGGTCAGTGGGACTTGTATGGATCTGATGCACCTTCACCATACAACCCTCTTCAGAGCAAGTTCTTTGAGACATTTGCCGCTCCCTTCACTAAGAGAGGCCTTTTGCTCAAATTCTTGATACTGGGAGGTGGTTCCACCCTTGCTTATCTAAGCTCAACAGCCTCAGGGGATGTTCTACCAATCAAGAAGGGACCACAACTTCCACCAAAGCTTGGTCCACGTGGAAAAATCTAATTTTTCTAGATCCTACATCCTTCAAACTCGTGGTTGTGATTAAATGTATCTTCCTTTGTAAGTATGTTTGGATCCCAACTAAGACCCCTTAATTATTTTGAAGTGTTGTTTATGTCATTTGGGGCATTCTTGTTAACTTGATGCTATTCTGATAACCTGATTAATATATTAGACCTGTTAAGTTTATAT
>DV556048|Panax ginseng||DC05030B06 Panax ginseng cDNA library Panax ginseng cDNA, mRNA sequence.
ATTTGTTTTTTTTTACCCGGAAAGCGCGCCATTGTGTTGGTACCCGGGAAATTCGGCCATTACGNGCCGGGGGCTTCTCAAAAGAAGAAAACATGGCAGCAGAGATGGCTTTAGTGAAACCCATCTCCATCTCCAAAATTGGGAACCAAACAAGAACTCCATACACAAAATTCTTGAGAATTAGTATGTCAGCCACCAGCTCAAATCCCACCAGCAGCAGCACAAATGCATCAAAGAAGGGTAGCAAGAAAGGGATAAAGGAGTCGCTGCTGACACCAAGATTTTACACCACTGATTTTGATGAAATGGAGACCCTTTTCAACACTGATATCAACAACAATCTGAATGAGGCCGAGTTTGAGGCCCTGCTACAGGAATTCAAGACTGATTACAATCAGACCCATTTTGTGAGGAACAAGGAGTTCAAGGAGGCGGCTGATAAAATGCAAGGCCCAATGCGCCAAATCTTTGTGGAATTCTTGGAGAGGTCTTGCACTGCTGAGTTCTCTGGTTTCCTTCTCTATAAGGAGCTTGGAAGAAGACTCAAGAAAACTAATCCTGTGGTAGCTGAGATTTTCTCTCTCATGTCTAGGGATGAAGCCAGGCATGCAGGGGTTTTTGAACAAGGGTTTATCTGATTTCAACTTAGCATTGGACTTGGGATTCTTGACGAAGGCTAGAAAATACACATTTTTCAAGCCAAAGTTCATTTTCTATGCAACATATTTTGTCTGAG
>DV556039|Panax ginseng||DC05030A09 Panax ginseng cDNA library Panax ginseng cDNA, mRNA sequence.
ATATATTTTTTTTACAGGCAAAGCTCGCCATTGTGTATGGTACCCCGGGGAATTCGGCCATTACGGCCGGGGATTCTGCACGCACTAAGCTTAATTGCTACCAAATGGCAGCCATGAACTCCAGTGTGTTGGCATGCAGCTATGCTATATCCGGTACCGGATCGTCGGAGCTAAGCTCCAAGCTTGTTTCATTGCCTTCAGTTGGATCCTCAGTTGTTAAAATGCCAGTTATCAGGGCTCAACAGGCTAGACTTTCTGATTCCAGAGAATCACGCCATGACGGTGTCCAAGGAAGAAGGGCTGCATTTCTTTGCCTCGGAGCTGCCCTTTTCGCCGCCGCCGCCACCACTTCTTCTGCCAATGCTGGAGTTATTGAAGATGCACTCGAGAAATCCAAAGCTAACAAGGAATTGAATGATAAGAAAAGGTTGGCTACGAGTGGAGCAAACTTTGCTAGAGCATATACAGTTCAGTTTGGCACATGCACTTTCCCATATAACTTCACTGGCTGCCAAGATCTTGCCAAGCAAAAGAAAGTGCCATTTATTTCTGATGATTTGGAGTTGGAGTGCGAAGGAAAGGAAAAATACAAGTGTGGTTCCAATTTGTTCTGGAAATGGTGAAGAGTGTGAAAAATCTATGCTTCTTTACTCTCCTCCTCCACCCATCATGTATCTATTTTTTTTTCAATTTGACAACTTCTGATACATTTGGTCTGTAATTTCCTCCGTTCCTTTTCTGGGTTTTTTTCTTGC
>DV556037|Panax ginseng||DC05030A07 Panax ginseng cDNA library Panax ginseng cDNA, mRNA sequence.
GAGCTCGTGTGTTTTTATAACTGCCCGNAAGTCGCGCCCATGNTGTGTTGGTACCCCGGGAAATTCGGCCATTACGGCCGGGGGAGAGAGAGGGAGAGGGAGAGAGTGCAGAGAAAATGGCGTCGAGATTCCCGATACAGGTGATGAGCCCGAGGAAGGTCAATTCTCGTGGCCACACAACAATTAATCCCCACCATAGCTCATTCTCCTGGAGGCGCACGTTAGCATCCGATGACTTTCTTTCCTCCCTCCCCCTCGCCAATTTGTCTCCTCCAGGGCATGTGCAGCCATTATTAGTTACATGTGCTGCCGGGGCAGCGCCTGCGGCAGCAAATCTGGCTCCAGGGACGCCCGTCAGGCCTACCAGCATACTGGTGGTGGGTGCTACCGGAACTCTGGGCAGACAGGTGGTCCGTCGGGCACTAGACGAGGGCTACGACGTCCGCTGCCTAGTTAGGCCTAGACCTGCCCCTGCTGACTTCCTTCGCGACTGGGGTGCTACTGTCGTCAATGCAGACCTAAGCAAACCTGAGACAATACCTGCGACTTTGGTTGGTGTCCATACAGTCATTGACTGTGCTACAGGACGTCCCGAAGAACCCATAAAAACTGTTGATTGGGAAGGAAAAGTTGCTCTGATACAATGTGCGAAAGCAATGGGAATCCAAAAGTTTGTATTCTTTTCCATTCATAACTGTGATAAGCATCCTGAAGTTCCACTGATGGAGATAAAGTACTGGCACTGAGAAGTTT
>DV555963|Panax ginseng||DC05029C05 Panax ginseng cDNA library Panax ginseng cDNA, mRNA sequence.
AAATCGTGTTTTTTATACCGNAAGCGCGCCATTGTGTTGGTACCCGGGAATTCGGCCATTACGGCCGGGGAAGCATGTACCCGGATTCATTGAGAAGGCTGAGGAGTTTAAGGCCAAGGGCGTTGATGAAATTCTGTTGATCAGTGTTAATGATCCATTTGTGATGAAGGCATGGGCAAAAACTTACACGGACACAAAGTTCGTCAAGTTTTTGGCAGATGGTTCAGCAAAATACACCCATGCTCTTGGCCTAGAGCTTGACCTCTCGGAGAAGGGGCTTGGCACCCGCTCTCGCAGGTTTGCCTTGCTTGTGGATGACCTCAAGGTGAAGACTGCCAATATTGAAACTGGGGGAGAATTCACTGTCTCAGGCTCGGAGGATCTCCTCAAGACTCTTTAATTTTCTCAGTTTCTTGCAATCAAGTATTAGTCTCATGACTATTTGATCAGTATCTTAATAATTTTGTTCTTCAAATACCTTGATACTTGTTTTTGAAATGTGGTTGGACTATGAAAGTCAAATAGTAATGTTGAAAGTTATGTTTTGAACCCCCTAATCCAAAAACAACAAATAACCAACACCATGTCGGCCGCCTTGGCCCATTCGACTCTAGACTCGACCAAGCTTATGCATGCGGCCCCAATTTCGAGCTTATTTGGCCAATTCGCCTTATAGGGAGGCGTATTACAATTTAACTGGCCCGTGGTTTTAAAACCTGCGGACTGGGGAAAAACCTCTGGCGTTACCCCAACTTAT
>DV555929|Panax ginseng||DC05028H07 Panax ginseng cDNA library Panax ginseng cDNA, mRNA sequence.
TTTTTTTTTTTTTACCCGGAAAGCGCGCCATTGTGTTGGTACCCGGGAATTCGGCCATTACGGCCGGGACACAACCCAAATAAACAAACCACCACAACCTCCCTCTTCACCTTATTCTGCACGCACTAAGCTTAATTGCTACCAAATGGCAGCCATGAACTCCAGTGTGTTGGCATGCAGCTATGCTATATCCGGTACCGGATCGTCGGAGCTAAGCTCCAAGCTTGTTTCATTGCCTTCAGTTGGATCCTCAGTTGTTAAAATGCCAGTTATCAGGGCTCAACAGGCTAGACTTTCTGATTCCAGAGAATCACGCCATGACGGTGTCCAAGGAAGAAGGGCTGCATTTCTTTGCCTCGGAGCTGCCCTTTTCGCCGCCGCCGCCACCACTTCTTCTGCCAATGCTGGAGTTATTGAAGATGCACTCGAGAAATCCAAAGCTAACAAGGAGTTGAATGATAAGAAAAGGTTGGCTACGAGTGGAGCAAACTTTGCTAGAGCATATACAGTTCAGTTTGGCACATGCACTTTCCCATATAACTTCACTGGCTGCCAAGATCTTGCCAAGCAAAAGAAAGTGCCATTTATTTCTGATGATTTGGAGTTGGAGTGCGAAGGATAGGAAAAATACAAGTGTGGTTCCAATGTGTTCTGGAAATGGTGAAGAGTGTGAAAAATCTATGCTTCTTTACTCTCCTCCTCCACCCATCATGTATCTAATTTTTTTTTCAATTTGACAACTTCTGATACATTTGGTCTGGTAATTTTCTCCG
>DV555901|Panax ginseng||DC05028F03 Panax ginseng cDNA library Panax ginseng cDNA, mRNA sequence.
AAATCGTGTTTTTTATACGGAAGTGCGCCATTGTGTTGGTACCCGGGAATTCGGCCATTACGGCCGGGGAACTGGGAATAATTTAGTTAGCTTTGAAACAAAAGGCAGCAATGGCATCTCTAGCAACCTTTGCTGCTGTTCAGCCCATCACCGTTCAGGGCCTTGGTGCTCGAAGTTCACTTACTGGGACTAAGCTCCACATCAAGCCATCTCGCCAGAGTTTGAGATCCACCAATTGCAAGACTGGTGCTGTTGTGGCCAAATATGGTGAAAAGAGTGTCTACTTTGATTTGGAGGATTTGGGCAACACCACCGGGCAGTGGGACTTGTATGGATCTGATGCACCTTCACCATACAACCCTCTTCAGAGCAAGTTCTTTGAGACATTTGCCGCTCCCTTCACTAAGAGAGGCCTTTTGCTCAAATTCTTGATACTGGGAGGTGGTTCCACCCTTGCTTATCTAAGCTCAACAGCCTCAGGGGATGTTCTACCAATCAAGAAAGGACCACAACTTCCACCAAAGCTTGGTCCACGTGGAAAAATCTAATTTTTCTAGATCCTACATCCTTCAAACTCATGGNTTGTGTTTAAATGTATCTTCCTTTGTAAGTATGTTTGGATCCCAACTAAGACCCCTTAATTATTTTGAAGTGTTGTTTATGTCATTTGGGGCATTCTTGTTAACTTGATGCTATTCTGATAACCTGATTAATATATTAGACCTGTTAGTTTTTAAA
>DV555828|Panax ginseng||DC05027H02 Panax ginseng cDNA library Panax ginseng cDNA, mRNA sequence.
ATTTTGTTTTTTTTATACCGAAATTTCGCCATTGTGTTGGTACCCGGNGAATTCGGCCATTACGGCCGGGGGTGGGAATTTGGAAGTAGAAGTTTAGTTTTGAAGCTAAAAGGGACAGGCAGTCACCAGTCCAATGGCATCTCTAGCAACCTTTGCTGCTGTTCAACCCATCACCGTTAAGGGCCTTGGTGGAAGCTCACTTACCGGAACTAAGCTCCACATCAAGCCAGCTCGCCAGACTTTGAGACCCACCAATTTCAAAGCTGGTGCTGTGGTGGCAAAATATGGTGAAAAGAGTGTGTACTTTGATTTGGAGGATTTGGGCAACACCACTGGCCAATGGGACTTGTATGGTTCCGATGCTCCTTCACCATACAACCCTCTTCAGAGCAAGTTCTTTGAGACATTTGCCGCTCCCTTCACAAAGAGAGGTCTTTTGCTCAAATTCTTGATATTGGGAGGTGGTTCCACCCTTGCTTATCTAAGCTCCACAGCCTCGGGGGATATTCTACCAATCAAGAAGGGCCCACAACTTCCTCCAAAGCTTGGTCCACGTGGAAAAATCTAATTCATTCTAGCTCCTACATCCTTCAACCTCTTGATTGTGTTTAAAATGTATCTTCCCTACAGCTTGTAAGTATGTTGGATCCCATCTAAGACCCCTCTGATTATTTCAATATGTTTGTATTGGNGATCCANNNNANNAAAAAAAAAAAAAAAAAAAACCCTTGTTCGGCCGCCTCGGNCCCAGTCGGACTCTAG
>DV555753|Panax ginseng||DC05027A11 Panax ginseng cDNA library Panax ginseng cDNA, mRNA sequence.
CTTTTTTTTTTTTTATCGGGAAGCGCGCCATGNTGTGTTGGTACCCCGGGAAATTCGGCCATTACGGCCGGGGGCTTAGTGGGAATCTGGAAGTAGAAGTCAAGTTAGTTTTGAAGCTAAAAGGGACAGGCAGTCACCAGTCCAATGGCATCTCTAGCAACCTTTGCTGCTGTTCAACCCATCACCGTTAAGGGCCTTGGTGGAAGCTCACTTACCGGAACTAAGCTCCACATCAAGCCAGCTCGCCAGACTTTGAGACCCACCAATTTCAAAGCTGGTGCTGTGGTGGCAAAATATGGTGAAAAGAGTGTGTACTTTGATTTGGAGGATTTGGGCAACACCACTGGCCAATGGGACTTGTATGGTTCCGATGCTCCTTCACCATACAACCCTCTTCAGAGCAAGTTCTTTGAGACATTTGCCGCTCCCTTCACAAAGAGAGGTCTTTTGCTCAAATTCTTGATATTGGNGAGGTGGTTCCACCCTTGCTTATCTAAGCTCCACAGCCTCGGGGGATATTCTACCAATCAAGAAGGGCCCACAACTTCCTCCAAAGCTTGGTCCACGTGGAAAAATCTAACTTATTCTAGCTCCTACATCCTTCAACCTCTTGATTGTGTTTAAAATGCATCTTCCCTACAGCTTGTAAGTATGTTTGGATCCCATCTAAGACCCCTCTGATTATTTCAATATGTTTGTATTGNGATTTGGGGGCATTCTTGTAAACTTTATGCTTTGGCTGTTGACTATCATATATTGATAATCTACTTACAATCACGAGGCTAAAAAAAAAAAAAAAAAAAAAA
>DV555707|Panax ginseng||DC05026F01 Panax ginseng cDNA library Panax ginseng cDNA, mRNA sequence.
CTTTTTTTTTTTTTTACACGCGAAAGCGCGCCATTGTGTTGGTACCCGGGAATTCGGCCATTACGGCCGGGGGTTTGTTTTCCGTTAGGAGCCGCAATAAAACCACAGAAAGCTCGCCATGGGAAGAAGACCTGCAAGGTGTTATCGCCAGATCAAGAACAAGCCTTATCCAAAGTCTCGGTACTGCCGTGGTGTGCCAGATCCAAAGATTAGGATTTATGATGTTGGAATGAAAAAAAAAGGTGTTGATGAATTTCCGTTCTGTGTTCATTTGGTCAGTTGGGAAAAGGAGAATGTTTCTAGCGAGGCTTTGGAAGCTGCCCGTATTGCTTGTAACAAGTACATGACCAAGTTTGCTGGCAAGGATGCTTTCCATTTGAGGGTCAGGGTTCACCCTTTCCATGTGCTTCGTATCAACAAGATGTTGTCATGTGCTGGGGCTGATAGGCTCCAGACAGGCATGAGGGGAGCTTTTGGTAAGCCTCAGGGAACCTGTGCCCGGGTCAGCATTGGCCAGGTGCTCCTCTCAGTCCGTTGCAGAGACTCGAACAGCCATCATGCTCAGGAGGCATTGCGTCGTGCAAAGTTCAAGTTCCCTGGTCGTCAAAAGATAATAGTCAGCAGGAAATGGGGCTTCACCAAATTTAGCCGTACTGACTATGTGAAGTGGAAGGCCGAAAACCGCATTCTTCCAGATGGTGTTAATGCGAAGCTTCTGGGATGCCATGGACCTCTTGCACGTCGACAGCCTGGGAGAGCATTTATTGACGCAGTAACTGC
>DV555666|Panax ginseng||DC05026B08 Panax ginseng cDNA library Panax ginseng cDNA, mRNA sequence.
TTTTTTTGGTTTNTCCGGGCAGCGCGCCATTGTGTTGGTACCCGGGAATTCGGCCATTACGGCCGGGGCTGCTGACTAAAACTAAAACCTCGCAGTTGTTATCTCTTCCAGGCTTCTCGAAGAAAAAGAAGAAGAATATGACTCTCTCAAACGATATCGATCTACTTCACCCGCCGGCTGAGGTGGAGAAGAGGAAGCACAAGCTCAAGCGTCTCGTCCAAACCCCCAACTCTTTCTTCATGGATGTGAAATGCCAAGGCTGCTTTAGCATAACCACTGTGTTTAGCCACTCCCAAACGGTTGTGGTATGCGGCAACTGCCAGACGGTGTTATGCCAGCCAACTGGTGGCCGTGCTAGGCTCACTGAGGGATCCTCTTTTAGGAGAAAGAACGATTGATGGATGCTTCAAATTTGGTCAGTCCATTGAGAGATGAAGCAACTTTTTGTTCTAAGAACTTTCATATGTTATTGTGGTAAATCATGGAAGAAGACTTTATCAAGATGTCTTAGGATGCTTATTTTGGTACTTTATTGGTTGAATTGGTTCTGTTTGGAAGATGAAACTTTTTGCTAGTGTTATGAATGGAAGTCTGAATTATAATTTTATACCTGTTTTACCCTTGTNNNANAAAAAAAAAANAAAAAAAAAAANNCCGTGTCGGCCGCCTCGGCCCAGTCGACTCTAGACTCGAGCAAGCTTATGCATGCGGCCGCAATTCGAGCTCACTTGGCCAATTCGCCCTATAGGGGAGTCGTATTACAATTCACTTGGCCGGTCGTTTTACAACGTC
>DV555657|Panax ginseng||DC05026A11 Panax ginseng cDNA library Panax ginseng cDNA, mRNA sequence.
TTTTTTTTGTTTATAGGCAACGCTCCTTGTGTTGGTACCCGGGAATTCGGCCATTACGGCCGGGGAATTTAGTTAGCTTTGAAACAAAAGGCAGCAATGGCATCTCTAGCAACCTTTGCTGCTGTTCAGCCCATCACCGTTAAGGGCCTTGGTGCTGGAAGTTCACTTACTGGGACTAAGCTCCACATCAAGCCATCTCGCCAGAGTTTGAGATCCGCCAATTGCAAGGCTGGTGCTGTTGTGGCCAAATATGGTGAAAAGAGTGTCTACTTTGATTTGGAGGATTTGGGCAACACCACCGGTCAGTGGGACTTGTATGGATCTGATGCACCTTCACCATACAACCCTCTTCAGAGCAAGTTCTTTGAGACATTTGCCGCTCCCTTCACTAAGAGAGGCCTTTTGCTCAAATTCTTGATACTGGGAGGTGGTTCCACCCTTGCTTATCTAAGCTCAACAGCCTCAGGGGATGTTCTACCAATCAAGAAGGGACCACAACTTCCACCAAAGCTTGGTCCACGTGGAAAAATCTAATTTTTCTAGATCCTACATCCTTCAAACTCGTNGGTTGTGATTAAATGTATCTTCCTTTGTAAGTATGTTTGGATCCCAACTAAGACCCCTTAATTATTTTGAAGTGTTGTTTATGTCATTTGGGGCATTCTTGTTAACTTGATGCTATTCTGATAACCTGATTAATATATTAGACCTGGTTAGTTTAAAANNNNNNNANNNNCNCNNCNCCCCTCCCTTTTNTTTTTCTTTCCTCCTATTTCATAAACTACAAAAT
>DV555632|Panax ginseng||DC05025G10 Panax ginseng cDNA library Panax ginseng cDNA, mRNA sequence.
CTTATTTGTGTTTTTTTACACGCGAAAGCGCGCCATTGTGTTGGTACCCGGGAATTCGGCCTTACGGCCGGGCACCAGTCCAATGGCATCTCTAGCAACCTTTGCTGCTGTTCAACCCATCACCGTTAAGGGCCTTGGTGGAAGCTCACTTACCGGAACTAAGCTCCACATCAAGCCAGCTCGCCAGACTTTGAGATCCGCCAATTGCAAGGCTGGTGCTGTTGTGGCCAAATATGGTGAAGAGAGTGTCTACTTTGATTTGGAGGATTTGGGCAACACCACCGGTCAGTGGGACTTGTATGGATCTGATGCACCTTCACCATACAACCCTCTTCAGAGCAAGTTCTTTGAGACATTTGCCGCTCCCTTCACTAAGAGAGGCCTTTTGCTCAAATTCTTGATACTGGGAGGTGGTTCCACCCTTGCTTATCTAAGCTCAACAGCCTCAGGGGATGTTCTACCAATCAAGAAGGGACCACAACTTCCACCAAAGCTTGGTCCACGTGGAAAAATCTAATTTTTCTAGATCCTACATCCTTCAAACTCGTGGTTGTGATTAAATGTATCTTCCTTTGTAAGTATGTTTGGATCCCAACTAAGACCCCTTAATTATTTTGAAGTGTTGTTTATGTCATTTGGGGCATTCTTGTTAACTTGATGCTATTCTGATAACCTGATTAATATATTAGACCTGTTAAGTTTATATCTTAAAAAAAAAAAAAAAANAAAAAAAANCCTTGTCGGGCCGCTTGGGCCCAGTCGACTTTAAACTCAG
>DV555621|Panax ginseng||DC05025F11 Panax ginseng cDNA library Panax ginseng cDNA, mRNA sequence.
GTTTTTGTGGTTTTACACGGCAAGCGCGCCATTGTGTTGGTACCCGGGAATTCGGCCTTACGGCCGGGGAACTGGGAATAATTTAGTTAGCTTTGAAACAAAAGGCGGCAATGGCATCTCTAGCAACCTTTGCTGCTGTTCAGCCCATCACCGTTAAGGGCCTTGGTGCTGGAAGTTCACTTACTGGGACTAAGCTCCACATCAAGCCATCTCGCCAGAGTTTGAGATCCGCCAATTGCAAGGCTGGTGCTGTTGTGGCCAAATATGGTGAAAAGAGTGTCTACTTTGATTTGGAGGATTTGGGCAACACCACCGGTCAGTGGGACTTGTATGGATCTGATGCACCTTCACCATACAACCCTCTTCAGAGCAAGTTCTTTGAGACATTTGCCGCTCCCTTCACTAAGAGAGGCCTTTTGCTCAAATTCTTGATACTGGGAGGTGGTTCCACCCTTGCTTATCTAAGCTCAACAGCCTCAGGGGATGTTCTACCAATCAAGAAGGGACCACAACTTCCACCAAAGCTTGGTCCACGTGGAAAAATCTAATTTTTCTAGATCCTACATCCTTCAAACTCGTGGTTGTGATTAAATGTATCTTCCTTTGTAAGTATGTTTGGATCCCAACTAAGACCCCTTAATTATTNTGAAGTGTTGNCTATGTCATTTGGGGCATTCTTGTTAACTTGATGCTATTCTGATAACCTGATTAATATATTAGACCTGTTAAGTTTATATGTAANAAANCACAAAAAGNAGAGGAGNTAAACATGTCGGCCGCCTTGGGCCC
>DV555617|Panax ginseng||DC05025F07 Panax ginseng cDNA library Panax ginseng cDNA, mRNA sequence.
ATCTNNNNGTCCTCCTGTTTTTCTAGCAAAGCTCGCCATTGTGTTGGTACCCGGGAATTCGGCCATTACGGCCGGGGACAGCAAACTAGGCGTCAGGGTTTATTTTCCTGCAAAAACCAAAAACCTGTAATCTGAATAGGAGAGGTTAAAGTGACGGCGCCGCCGCTGTCCGCCTTGGCAAAGCCGTAGCTTCGTCTTGGCCCTCATTTTTTATCTCTTCCGTTTACTATTAGGGTTTATTCTTTTTATACATTTATATATACGGAGTTGTTTCACATAGTTGTATCAATGTCACCGAAATTATCAAAGGCTGACAAGAAGATCGCATACGATTCTAAGCTCTGCCAGCTTCTCGATGAGTACACTCAGATCCTCGTTGCAGCGGCAGATAATGTCGGGTCGAATCAGTTGCAGAACATCCGAAAAGGTCTTCGGGGCGATTCGGTTGTTCTGATGGGGAAAATACTATGATGAAGAGGTCTGTTAGGATTCATGCTGAGAAGACCGGTAACCAGGCTTTCCTCAATATCATTCCTCTACTTGTTGGTAATGTTGGGCTGATCTTTACTAAGGGTGATTTAAAGGAAGTGAGTGAAGAGGTCGCCAAGTACAAGGTTGGAGCTCCTGCTCGTGTTGGTTTCGTAGCTCCAGTTGATGTTGTTGGGCCACCAGGCAACACTGGCCTTGACCCCTCTCAGACATCCTTCTTCCAGGTGCTCAACATTCCGACTAAGATTAACAAGGGGTACTGTGGGAAATTATCACCCCCAGTTGGAGCTTATCAAGAAAAGGTGACAA
>DV555602|Panax ginseng||DC05025E04 Panax ginseng cDNA library Panax ginseng cDNA, mRNA sequence.
CTTTTATTTTTTTTATACGCAAAGCTCGCCATTGTGTTGGTACCCGGGAATTCGGCCATTACGGCCGGGGAGCCGCACCAACAATCCGCGTCTCTATTATCTTCCAGGTTGGGTTTGTTTTAGCTAGTAGCATCAATGTCTCCTGCTAAAGTTGACAATGCAAAAAAGGGCGATCCAAAGGCTCAGGCCTTGAAGGCTGCTAAGGCTGTCAAGGGTTCATCAACATTCAAGAAGAAAGCTAAGAGGATCAGAACATCTGTTACCTTTCACCGGCCGAAGACATTGAAGAAGGACAGGAACCCAAAGTATCCCCGTATCAGTGCGCCTCCAAGAAACAAATTGGACCATTATCAAATACTCAAATATCCACTGACCACAGAATCTGCTATGAAGAAGATCGAAGATAATAATACCCTTGTCTTCATTGTTGACATCCGTGCTGACAAGAAGAAGATAAAAGATGCAGTTAAAAAGATGTATGACATTCAAACCAAGAAAGTGAACACTTTGATCAGGCCTGATGGAACCAAGAAGGCTTATGTCCGCTTGACTCCTGATTACGATGCATTGGATGTGGCGAACAAGATTGGAATCATCTAAAGATAGATTTTATTTCTTCTCTTCCTAGGAAATTCATCCTTTGGTATAATGACAGTTTTGTTGATCTTTAGTAGTGTTTCAATTTTAATGTCCTACTTTGAACATGTTAAAGCTCTAGTAGGCTTTAAAATGCCTTCTTGATCACTGTGTGTATGACTATGTT
>DV555585|Panax ginseng||DC05025C11 Panax ginseng cDNA library Panax ginseng cDNA, mRNA sequence.
GTTTTTCTGTTTTCAGGCAAGCTGCCTTGTGTTGGTACCCGGGAATTCGGCCATTACGGCCGGGGGGGAATCTGGAAGTAGAAGTCAAGTTAGTTTTGAAGCTAAAAGGGACAGGCAGTCACCAGTCCAATGGCATCTCTAGCAACCTTTGCTGCTGTTCAACCCATCACCGTTAAGGGCCTTGGTGGAAGCTCGCTTACCGGAACTAAGCTCCACATCAAGCCAGCTCGCCAGACTTTGAGACCCACCAATTTCAAAGCTGGTGCTGTGGTGGCAAAATATGGTGAAAAGAGTGTGTACTTTGATTTGGAGGATTTGGGCAACACCACTGGCCAATGGGACTTGTATGGTTCCGATGCTCCTTCACCATACAACCCTCTTCAGAGCAAGTTCTTTGAGACATTTGCCGCTCCCTTCACAAAGAGAGGTCTTTTGCTCAAATTCTTGATATTGGGAGGTGGTTCCACCCTTGCTTATCTAAGCTCCACAGCCTCGGGGGATATTCTACCAATCAAGAAGGGCCCACAACTTCCTCCAAAGCTTGGTCCACGTGGAAAAATCTAACTTATTCTAGCTCCTACATCCTTCAACCTCTTGATTGTGTTTAAAATGCATCTTCCCTACAGCTTGTAAGTATGTTGGATCCCATCTAAGACCCCTCTGATTATTTCAATATGTTTGTATTGTGATTTGGGGGCATTCTTGGTAACTTTATGCTTGGCTGGTGACTATCATATATTGATAATCTACTTACAATCACGAGGCNGTTNAAAAAAAATAACAGCTGAAAAATAACCTTT
>DV555567|Panax ginseng||DC05025B05 Panax ginseng cDNA library Panax ginseng cDNA, mRNA sequence.
TTTTGTTTTTTTTATACGCAAAGCGCGCCATTGTGNTTGGTACCCCCGGGAATTCGGCCATTACGGCCGGGGAAGATGTCGTGTCTGAAGCTGATATATTTGTCACCACCACCGGTAACAAGGACATCATCATGGTTGACCACATGAGGAAGATGAAGAACAATGCCATTGTTTGCAACATTGGTCACTTTGACAATGAAATTGACATGCTTGGTCTTGAGACATTCCCGGGTGTGAAGAGAATTACCATCAAGCCCCAAACCGACAGGTGGGTCTTCCCCGACACCCAATCGGGCATCATTGTTTTAGCCGAGGGACGTCTGATGAACTTGGGTTGCGCCACTGGTCACCCCAGCTTTGTGATGTCTTGCTCGTTCACGAACCAAGTGATTGCCCAGCTTGAGTTGTGGAAGGAAAGGAGCACCGGGAAGTACGAGAAGAAGGTGTACGTCTTGCCCAAGCACCTTGACGAGAAGGTAGCAGCTCTTCATCTTGGAAAACTTGGTGCTAAGCTCACTAAGCTCAGCAAGGACCAGGCTGATTACATTAGTGTACCAGTTGAGGGACCATACAAGCCTGTTCACTACAGGTACTGAGAAGGAAATGATTGTGAGAAATTGAGAAAAACAGAATGTTCAACGGCTTGATTGTTTAATTTTAATACTTTTGCTTTTGTTTAGAACACTAGTAGTTGCGAGTTTTATGGGGGTAAGGAAAGTGGGAGACNATGGGATTGGTCTCTGTTGAAATAACCATGTNTTGGTTGAATAAAGGTGGTTTTGGGGGGAG
>DV555514|Panax ginseng||DC05024E12 Panax ginseng cDNA library Panax ginseng cDNA, mRNA sequence.
ATTATTGTGTTTTTTTTACTCCCGGAAAGTCTGCGCCCATGTGTGTTGGTACCCCGGGAAATTCGGCCATTACGGCCGGGGAACTGGGAATAATTTAGTTAGCTTTGAAACAAAAGGCAGCAATGGCATCTCTAGCAACCTTTGCTGCTGTTCAGCCCATCACCGTTAAGGGCCTTGGTGCTGGAAGTTCACTTACTGGGACTAAGCTCCACATCAAGCCATCTCGCCAGAGTTTGAGATCCGCCAATTGCAAGGCTGGTGCTGTTGTGGCCAAATATGGTGAAAAGAGTGTCTACTTTGATTTGGAGGATTTGGGCAACACCACCGGTCAGTGGGACTTGTATGGATCTGATGCACCTTCACCATACAACCCTCTTCAGAGCAAGTTCTTTGAGACATTTGCCGCTCCCTTCACTAAGAGAGGCCTTTTGCTCAAATTCTTGATACTGGGAGGTGGTTCCACCCTTGCTTATCTAAGCTCAACAGCCTCAGGGGATGTTCTACCAATCAAGAAGGGACCACAACTTCCACCAAAGCTTGGTCCACGTGGAAAAATCTAATTTTTCTAGATCCTACATCCTTCAAACTCGTGGTTGTGATTAAATGTATCTTCCTTTGTAAGTATGTTTGGGATCCCAACTAAGACCCCTTAATTATTTTGAAGTGTTGTTTATGTCATTTGGGGCATTCTTGTTAACTTGATGCTATTCTGATAACCTGATTAATATATTAGACCTGTTAAGTTTATATTTAAAAAAAAAA
>DV555504|Panax ginseng||DC05024E02 Panax ginseng cDNA library Panax ginseng cDNA, mRNA sequence.
TTTTTTTTTTTTTATGGGGAAAGCTCGCCATTGTGTTGGTACCCGGGAATTCGGCCATTACGGCCGGGACATCTCAGTCGCTGAGATAATACACACCGTAACCGTGTGCGTCTGAGAGAGACAATCGGTCCAACATGACGACAAGGTTCAAAAAGAACAGGAAGAAGAGAGGTCACGTGAGCGCCGGCCACGGTCGTATCGGTAAGCACCGTAAGCATCCCGGTGGTCGAGGAAACGCCGGAGGAATGCACCACCACCGGATCTTATTCGACAAGTACCATCCGGGGTATTTCGGGAAAGTGGGAATGAGGTACTTCCACAAGCTCCGCAACAAGTTCTACTGCCCTATCGTTAACATCGACAAGCTCTGGTCGCTCCTTCCTCAGGAGGCAAAAGACAAGGCCGATTCCCAGAATGCCCCCGTGATCGACGTCACTCAGCACGGATACTTCAAGGTTCTTGGTAAGGGTGTTTTGCCGAGTTCTCAGCCGATCGTTGTGAAGGCCAAGCTCGTGTCGAAGACCGCGGAGAAGAAGATCAAAGAATCAGGTGGCGCCGTTGTTCTTACTGCTTAGGTTTGAAGTTTAATTATTAAATTTCTAAGCTTTAAGGTTTTAGAAGTTTTAAGATGTATCTTATTGGACCTTTTTGCAATGCTACAGTTTTTTTTAAATATCTTTTGTTTAATGGTGAAAGGGATATGGTTTACTNNNNAANAANANNAANAAAAAAAANNCCTTGTCGGCCGCCCTGGCC
>DV555456|Panax ginseng||DC05024A02 Panax ginseng cDNA library Panax ginseng cDNA, mRNA sequence.
TTTTTTTTTTTTTACTCCGAAAGTGCGCCATTGTGTTGGTACCCGGGAATTCGGCCATTACGGCCGGGGACTCCAAAGGCACCATGGCAAGTTTGGCAGTGGTGCACCATAAAGTAAATCCTTCTTTCTCTCTCCTCACTTCATCACTCTCTGACTTCAATGGCATCAGATTGAGCTCCTCAATTCAGTATAAAAGGAAAGTATGGCAGCCGAAAGGAGCATTGCATGTTACAGCATCAAGTGCCAAGAAAATTCTTATAATGGGAGGCACCCGATTCATTGGTGTCTTTCTGTCCAGGCTTCTGGTCAAAGAAGGCCATCAGGTGACTCTGTTCACTAGAGGGAAAGCGCCCATTACCCAACTCTTGCCTGGTGAATCAGATGTGGAGTATAATGATTTTAAATCCAAGATCTTTCACTTGAAAGGAGACCGAAAGGATTTTGATTTTGTGAGAACCAGTTTGGCTGCGGAAGGCTTTGATGTTGTTTATGATATTAATGGACGTGAGGCAGATGAAGTAGAGCCCATACTGGATGCATTGCCAAATCTAGATCAGTACATATACTGCTCTTCAGCTGGTGTTTACCTCAAATCTGATATCTTACCACATTTTGAGAGTGATGCAGTTGATCCGAAGAGCAGGCACAAGGGAAAGCTTAACACAGAGTCCTTGCTGCAATCAAGGGATGTTAACTGGACTTCTCTGAGACCAGTCTATATCTACGGACCATTAAA
>DV555429|Panax ginseng||DC05023F11 Panax ginseng cDNA library Panax ginseng cDNA, mRNA sequence.
CTTTTTTTTTTTTTACGCGGAAAGCGCGCCATTGTGTTGGTACCCGGGAATTCGGCCATTACGGCCGGGGATTCGTCGTGGTCACCAGGTGTACCAACAAGTCTGTGCATCCTGCCATTCAATGTCCCTAATTTCGTATCGTGACTTAGTGGGTGTGGCATATACGGAGGAGGAAACAAAGGCCATGGCTGCTGAGATTGAGGTGGTTGATGGACCTAATGATGAGGGCGAGATGTTTACTCGTCCTGGAAAATTGAGCGATCGATTTCCACAGCCATATCCAAATGAGCAAGCGGCTAGATTTGCTAATGGAGGGGCCTATCCTCCAGATTTAAGTCTTATTACTAAAGCTCGTCATAATGGTCAGAACTATGTATTTGCCCTTCTTACTGGTTACCGTGACCCTCCGGCTGGCGTTTCAATCAGAGAAGGCTTGCATTATAATCCTTACTTTCCTGGGGGAGCTATTGCTATGCCTAAAATGCTTAATGATGGTGCCGTTGAGTATGAAGACGGCACCCCTGCAACAGAAGCTCAGATGGGAAAAGACATTGTGTCCTTTTTGTCATGGGCTGCAGAACCAGAAATGGAAGAGAGGAAACTGATGGGATTCAAGTGGATATTCGTACTGTCTAGCACTTCTTCAGGCAGCTTACTACAGGCGCTTGAAGTGGTCTGTTCTCAAGTCTCGGAAGCTGGTTCTTGATGTTGTCAACTAGACCCCCCAGGGTTCCTCCTCACCTTAATGTT
>DV555380|Panax ginseng||DC05023B10 Panax ginseng cDNA library Panax ginseng cDNA, mRNA sequence.
GTTTTTTTTTTTTTACGCGGAAAGCGCGCCATTGTGTTGGTACCCGGNGAATTCGGCCATTACGGCCGGGGGGGAATTTGGAAGTAGAAGTTTAGTTTTGAAGCTAAAAGGGACAGGCAGTCACCAGTCCAATGGCATCTCTAGCAACCTTTGCTGCTGTTCAACCCATCACCGTTAAGGGCCTTGGTGGAAGCTCACTTACCGGAACTAAGCTCCACATCAAGCCAGCTCGCCAGACTTTGAGACCCACCAATTTCAAAGCTGGTGCTGTGGTGGCAAAATATGGTGAAAAGAGTGTGTACTTTGATTTGGAGGATTTGGGCAACACCACTGGCCAATGGGACTTGTATGGTTCCGATGCTCCTTCACCATACAACCCTCTTCAGAGCAAGTTCTTTGAGACATTTGCCGCTCCCTTCACAAAGAGAGGTCTTTTGCTCAAATTCTTGATATTGGGAGGTGGTTCCACCCTTGCTTATCTAAGCTCCACAGCCTCGGGGGATATTCTACCAATCAAGAAGGGCCCACAACTTCCTCCAAAGCTTGGTCCACGTGGAAAAATCTAATTCATTCTAGCTCCTACATCCTTCAACCTCTTGATTGTGTTTAAAATGTATCTTCCCTACAGCTTGTAAGTATGTTGGATCCCATCTAAGACCCCTCTGATTATTTCAATATGTTTGTATTGTGATTTGGGGGCATTCTTGTAAACTTTATGCTTGGCTGTTGACTATCATATATTGATAATCTACT
>DV555343|Panax ginseng||DC05022G09 Panax ginseng cDNA library Panax ginseng cDNA, mRNA sequence.
AACCCCCCGCGTTTTTTTTCCTTTCTCCGGAAGNCTGCGCCTTATGTGTTGCTTACACCTGGTAATTAGGCTCTATACGGGCCGGGGGTGTACATCATTAAGCTCAAACTATTTAGGAAGAGGCATATTTAGCATATCCCCCGGTGAATGATTTAACCGAGTTATTCTCGCTGGAATATTCATGGCGTTTTTAGGATGATAACGAGGCGCAAAAAATGAAAAGTACTCTATCAATTGTGAGCGGACAACAATTTCACACAGGAAACAGCTATGACCATGATTACCCCAAGCTCCGAGATCTGGACGAGCTTTTTTTTTTTTTCTCGGAAAGCGCGCCATTGTGTTGGTACCCGGGAATTCGGCCATTACCGCCGGGGGGGAATAATTTAGTTAGCTTTGAAACAAAAGGCAGCTATGGCATCTCGAGCAACCTTTGCTGCTGTTCAGCCCATCACCGTAAAGGGCCTTGGTGTTGGAAGTTCACTTACTGGGACTAAGCTCCACATCAAGCCATCTCGCCAGAGTTTGAGATCCGCCAATTGCAAGGCTGGTGCTGTTGTGGCCAAATATGGTGAAAAGAGCGTCTACTTTGATTTGGAGGATTTGGGCAACACCACCGGTCAGTGGGACTTGTATGGATCTGATGCACCTTCACCATACAACCCTCTTCAGAGCAAGTTCTTTGAGACATTTGCCGCTCCCTTCACTAAGAGAGGCCTTTTGCTCAAATTCTTGATCTGGGNGAGGTGGTTCCACCCTTGCTTATCTAAGCTCAACA
>DV555342|Panax ginseng||DC05022G08 Panax ginseng cDNA library Panax ginseng cDNA, mRNA sequence.
ATTTTTTTTTTTTTACGCGCGAGCGCGCCATTGTGTTGGTACCCGGGAATTCGGCCTTACGGCCGGGGATGGCATCTCTAGCAACCTTTGCTGCTGTTCAGCCCATCACCGTTAAGGGCCTTGGTGCTGGAAGTTCACTTACTGGGACTAAGCTCCACATCAAGCCATCTCGCCAGAGTTTGAGATCCGCCAATTGCTAGGCTGGTGCTGTTGTGGCCAAATATGGTGAAAAGAGTGTCTACTTTGATTTGGAGGATTTGGGCAACACCACCGGTCAGTGGGACTTGTATGGATCTGATGCACCTTCACCATACAACCCTCTTCAGAGCAAGTTCTTTGAGACATTTGCCGCTCCCTTCACTAAGAGAGGCCTTTTGCTCAAATTCTTGATACTGGGAGGTGGTTCCACCCTTGCTTATCTAAGCTCAACAGCCTCAGGGGATGTTCTACCAATCAAGAAGGGACCACAACTTCCACCAAAGCTTGGTCCACGTGGAAACATCTAATTTTTCTAGATCCTACATCCTTCAAACTCGTGGTTGTGATTAAATGTATCTTCCTTTGTAAGTATGTTTGGATCCCAACTAAGACCCCTTAATTATTTTGAAGTGTTGTTTATGTCATTTGGGGCATTCTTGTTAACTTGATGCTATTCTGATAACCTGATTATATATTAGACCTGCTAAAANAAAAACTAAAAGNNAAAAAAAAACATGTCGGCCGCCTCGGCCAATCGACTTTAAACTCGAGCCAGCTTATGCATGCGGCCGCAATTCAAGCTCACTGG
>DV555324|Panax ginseng||DC05022F02 Panax ginseng cDNA library Panax ginseng cDNA, mRNA sequence.
GTTTTTTTTTTTTTTACACGGGAAAGGCGCCGCCATTGGGTGTTGGTACCCCCGGGAATTCGGCCATTACGGCCGGGGGGAAGGCACCAACCATTGCAGCAGCAGCTTATCTGAGGATGGCAGGAAGGCCTCCTGTTCTCCCCCTCCAGCAATCTGTCTTATTCAGAGAACTTCTTATACATGCTAGATTCATTAGGTAATAGGTCTTATACACCCAATCCTCGACTGGCTCCTGTGCTAGACATTCTCTTTATATTACATGCAGACCATGAGATGAATTGCTCAACTGCAGCTGCCAGGCATCTTGCTTCAAGAGCATGGCATATAAAGTCATTCCCACGTAACAACTGCATGGAGGATAAATTCACCAAAAAGGACGAAGCTTACTCCCCAACTGAAGACGAGTCACATGAAAGAATTCTTGATCAGGATCTGCCATTACTGGCCCAACAGGAAAAGAGTGTGCTGATCTGTGGCTAAGGATTGCAAGTTCTGCTAATGCTATTGTTTAGGTGCAGGAACTACNTAGTGGAGTTTGGATTAGTTATGGTTGGTCTTTCTCACAAGGTTCTCTATTAGGTTCTATATTTACAGATGTTAGTTGGATTTGGCCGTGGGATTTTGTAAGGACTAAGATCTGATTTTTGGTTTGTTTAAGACACCATATATGTTATTTGATATTTTATCATCACTTAATATTTTACAAAANAAAAAAANGGAANAAAAAAAAAAAAAAAAAAAAAAAAAACATGT
>DV555263|Panax ginseng||DC05022A01 Panax ginseng cDNA library Panax ginseng cDNA, mRNA sequence.
TTTTTTTTTTTTTATGCGGAAAGCGCGCCATTGTGTTGGTACCCGGNGAATTCGGCCATTACGGCCGGGGGAGCTGCCCTTTTCGCCGCCGCCGCCACCACCACCACTTCTTCTGCCAATGCTGGAGTTATTGAAGATGCACTCGAGAAATCCAAAGCCAACAAGGAATTGAATGATAAGAAAAGGTTGGCTACGAGTGGAGCAAACTTTGCTAGAGCATATACAGTTCAGTTTGGCACATGCACTTTCCCATATAACTTCACTGGCTGCCAAGATCTTGCCAAGCAAAAGAAAGTGCCATTTATTTCTGATGATTTGGAGTTGGAGTGCGAAGGAAAGGAAAAATACAAGTGTGGTTCCAATGTGTTCTGGAAATGGTGAAGAGTGTCAAAAATCTATGCTTCTTTACTCTCCTCCACCCATCATGTATCTATTTTTTTTTCAATTTGAAAACTTATGATACATTTGTTCTCTAAAAAAAAAAAAAAAAAAAAAAAAAAAAACCTTGTCGGCCGCCTCGGCCCAGTCGACTTTAAACTCGAGCAAGCTTATGCATGCGGCCGCAATTCGAGCTCACTTGGCCAATTCGCCCTATAGGGAGTCGTATTACAATTCACTGGCCGTCGTTTTACAACGTCGTGACTGGGAAAACCCTGGCGTTACCCAACTTAATCGCCTTGCAGCACATCCCCCTTTCGCCAGCTGGCGTAATAGCGAAGA
>DV555236|Panax ginseng||DC05021F10 Panax ginseng cDNA library Panax ginseng cDNA, mRNA sequence.
TTTTTTTTTTTTTATGCGGAAAGCGCGCCATTGTGTTGGTACCCGGNGAATTCGGCCATTACGGCCGGGGGTATTGGAAAGTCTACCATACTTAAGCTAATTTCAGGGGACCTTCAGCCAAGCTCAGGAACAGTTTTTCGATCGGCTAAGGTTCGCATTGCTGTTTTCAGTCAGCATCATGTTGACGGGCTTGACCTAACATCAAATCCCCTTCTTTATATGATGCGTAGCTTCCCAGGAGTGCCTGAACAGAAGCTTCGAAGTCATTTAGGTTCCTTTGGAGTAACTGGAAATCTTGCTCTTCAGCCTATGTACACCTTGTCTGGTGGTCAGAAGAGCAGGGTTGCATTTTCTAAGATAACCTTCAAAAAACCTCACATTATACTGCTTGATGAGCCATCAAATCATCTTGATTTGGATGCCGTGGAAGCGTTAATTCAGGGTCTTGTTCTGTTCCAAGGAGGCGTGCTGATGGTAAGTCACGATGAGCATCTGATATCTGGAAGTGTTGATCAGCTGTGGGCTGTATCTGAAGGCAGGGTGACTCCTTTCGAAGGGACATTCCACGATTACAAGAAATTACTCCAGTCCTAGGAGGGAGAGAGAGGAGATATTGAAATATNGAGTCGTCATAAACTGGTACGTGATATGATGATGGCGACATTACTGACATGTTTATTTAATGTAATTCAGTGGCTGACATTTTTGTTACCTCCGGTGGCATGGGATACATTTTTTGTTACTCTTTCTGAGACC
>DV555142|Panax ginseng||DC05020F12 Panax ginseng cDNA library Panax ginseng cDNA, mRNA sequence.
ATTTTTTTTGTTTTTTCCGCGGGAAAGCGCGCCATTGTGTTGGTACCCGGGAATTCGGCCATTACGGCCGGGGGTCCATCTGCACTTGCAGTGAAGGAAGCAGCATGGGGCCTGGCTCGCTATGCTGCCATTTCTCAGGATAACGGGTTGGTCCCAATTGTGGAGCCTGAGATTTTGCTTGATGGTGAACATGGAATTGACAGGACTTTTGAAGTTGCCCAGAAGGTATGGGAGGAAGTCTTCTTCTATCTCGCCCAGAATAGTGTCTTGTTTGAAGGTATCCTCCTCAAGCCCAGCATGGTTACTCCCGGAGCAGAGTGCAAGGAAAGGGCTACACCACAACAGGTTGCTGATTACACCCTCAAGCTCCTCGGCCGAAGAATTCCCCCTGCAGTCCCTGGAATCATGTTTTTGTCTGGTGGGCAATCTGAAGTGGAGGCTACTCTGAACTTAAATGCGATGAACCAATCTCCCAACCCATGGCATGTGTCCTTCTCATACGCAAGAGCCCTTCAGAACACTTGCCTCAAGACCTGGGGAGGAAGACCTGAGAACGTGAAGGCTGCTCAGGATGCTTTGCTTTTACGGGCAAGTGCAAACTCTCTTGCCCAGCTTGGAAAATACACTGGTAAAGGGAGAGTCCGAGGAGGCCAAGAAAGAATTGTTCGTCAAAGGCTACGTCTACTAAGCTGTCTGAGCAGAAGCTATAGGTGTAGATGATGAAAGTCCGATGTATTACGATGACAAATTGCATTAAGATTATAGCCAATTAAGAGGCAAAAAAAAAAA
>DV555107|Panax ginseng||DC05020D01 Panax ginseng cDNA library Panax ginseng cDNA, mRNA sequence.
GTTTTTTTTTTTTTCTCGGGAGCGCGCCTTGTGTTGGTACCCGGGAAATTCGGCCATTACGGCCGGGGAGAAAGAGAAAGAGTGGCATTAAACCCTAGTCGCTAACCTTCACAGTTCCTCCTCTCCCCTAAACCCTACTCTATTCTCCTCGTCTCAGTGAAATGGCTTTCTACAATAGAATTGGAAGCTTCATGAGGCAGACTAATGGGCATGTTTCAATGCCATCTATGTTTAACGCCATTCGTTGCATGTCATCCTCAAAGCTTTTCGTTGGAGCCAGGAATTCAAAACCATCCATCAACTATAACCCCAAAAGAACCAGATTCTGTAAACAACATAAAGGAAGAATGAAGGGAATATCTTATCAAGGTAATTATATTTCTTTCGGTAAATATGCTCTTCAGACACTTGAACCCGCTTGGATCACATCTAGACAAATAGAAGCAGGTCGACGAGCAATGACACGAAATGCACAATGTGGTGGGAAAATATGCACAATGTGACACGAATGGGTTCGGGGAAGGGATCCCCTAAATATTCGGTAGCTGTTGTTAAACCAGGTCGAATCCTTTACGAAATGGGTGGAATAACAGAAAATATAGCTAGAAAGGCTATTTCAATAGCATCGTCTAAAATTCCTATACGAACTCAATTCATTATTTTGGCATAAAAATGGAGAATCAAAGGAAATAGGTCTTGAGGATTAAAATAAACACCCTTGGTTAACCGGATCAACATTGTACAGTTTTTCAACATTTAATTNTATGATTGT
>DV555104|Panax ginseng||DC05020C10 Panax ginseng cDNA library Panax ginseng cDNA, mRNA sequence.
CTTTTTTTTTTTTTACAGGCCAGCCGCGCCATTGTGTTGGTACCCGGGAATTCGGCCATTACGGCCGGGGGTGGGAATTTGGAAGTAGAAGTTTAGTTTTGAAGCTAAAAGGGACAGGCAGTCACCAGTCCAATGGCATCTCTAGCAACCTTTGCTGCTGTTCAACCCATCACCGTTAAGGGCCTTGGTGGAAGCTCACTTACCGGAACTAAGCTCCACATCAAGCCAGCTCGCCAGACTTTGAGACCCACCAATTTCAAAGCTGGTGCTGTGGTGGCAAAATATGGTGAAAAGAGTGTGTACTTTGATTTGGAGGATTTGGGCAACACCACTGGCCAATGGGACTTGTATGGTTCCGATGCTCCTTCACCATACAACCCTCTTCAGAGCAAGTTCTTTGAGACATTTGCCGCTCCCTTCACAAAGAGAGGTCTTTTGCTCAAATTCTTGATATTGGGAGGTGGTTCCACCCTTGCTTATCTAAGCTCCACAGCCTCGGNGGATATTCTACCAATCAAGAAGGGCCCACAACTTCCTCCAAAGCTTGGTCCACGTGGAAAAATCTAATTCATTCTAGCTCCTACATCCTTCAACCTCTTGATTGTGTTTAAAATGTATCTTCCCTACAGCTTGTAAGTATGTTGGATCCCATCTAAGACCCCTCTGATTATTTCAATATGTTTGTATTGGGAATTGGGGGCATTCTTGTAAACTTTATGCTTGGCTGTTGACTATCATATATTGATAATCTACTTACAAACAAAAAAA
>DV555078|Panax ginseng||DC05020A08 Panax ginseng cDNA library Panax ginseng cDNA, mRNA sequence.
ATTTTCTTGTTTTTATCGGCAAGCGCGCCATTGTGTTGGTACCCGGGAAATTCGGCCATTACGGCCGGGGGTGTAGATGAATTTCCGTTCTGAGTTCATTTGGTCAGTTGGGAAAAGGAGAATGTTTCTAGCGAGGCTTTGGAAGCTGCCCGTATTGCTTGTAACAAGTACATGACCAAGTTTGCTGGCAAGGATGCTTTCCATTTGAGGGTCAGGGTTCACCCTTTCCATGTGCTTCGTATCAACAAGATGTTGTCATGTGCTGGGGCTGATAGGCTCCAGACAGGCATGAGGGGAGCTTTTGGTAAGCCTCAGGGAACCTGTGCCCGGGTCAGCATTGGCCAGGTGCTCCTCTCAGTCCGTTGCAGAGACTCGAACAGCCATCATGCTCAGGAGGCATTGCGTCGTGCAAAGTTCAAGTTCCCTGGTCGTCAAAAGATAATAGTCAGCAGGAAATGGGGCTTCACCAAATTTAGCCGTACTGACTATGTGAAGTGGAAGGCCGAAAACCGCATTCTTCCAGATGGTGTTAATGCGAAGCTTCTGGGATGCCATGGACCTCTTGCACGTCGACAGCCTGGGAGAGCATTTATTGACGCAGTAACTGCTTAGGGATGTGGATGTTTTCAGGCAACTTATATGCTCCTGTTGAATTGAATCTTTGGGACCCAGTGTACTTGCATTATCAATGTTTCTCGAGTTATTTTCCTTATGGGAAGGTTTTTGGTTTCAAGCCAGATTTGCACTATGGTTTCTATATTCTTATTATTACTTGCAGG
>DV555035|Panax ginseng||DC05019F01 Panax ginseng cDNA library Panax ginseng cDNA, mRNA sequence.
GGGGGNNNNGGGGGNNNNNCCCCCCCCCTTTTTCCCCGCTATATTTTTTTTTTACCGGAACTCGCCTTGTGTTGGTACCCGGGGAATTCGGCCATTACGGGCCGGGGGAACCCAAATAAACAAACCACCACAACCTCCCTCTTCACCTTATTCTGCACGCACTAAGCTTAATTGCTACCAAATGGCAGCCATGAACTCCAGTGTGTTGGCATGCAGCTATGCTATATCCGGTACCGGATCGTCGGAGCTAAGCTCCAAGTTGCCTTCAGTTGGATCCTCAGTTGTTAAAATGCCAGTTATCAGGGCTCAACAGGCTAGACTTTCTGATTCCAGAGAATCACGCCATGACGGTGTCCAAGGAAGAAGGGCTGCATTTCTTTGCCTCGGAGCTGCCCTTTTCGCCGCCGCCGCCACCACCACCACTTCTTCTGCCAATGCTGGAGTTATTGAAGATGCACTCGAGAAATCCAAAGCCAACAAGGAATTGAATGATAAGAAAAGGTTGGCTACGAGTGGAGCAAACTTTGCTAGAGCATATACAGTTCAGTTTGGCACATGCACTTTCCCATATAACTTCACTGGCTGCCAAGATCTTGCCAAGCAAAAGAAAGTGCCATTTATTTCTGATGATTTGGAGTTGGAGTGCCAAGGAAAGGAAAAATACAAGTGTGGTTCCAATGTGTTCTGGAAATGGTGAAGAGTGTCAAAAATCTATGCTTTTTTACTCTCCTCCACCCATCATGTATCTATTTTTTTTTCAATTGGAAAACTTATGATACATTTA
>DV554976|Panax ginseng||DC05019A02 Panax ginseng cDNA library Panax ginseng cDNA, mRNA sequence.
TTTTTTTTTTTTTACTCCGGAAAGCGCGCCATTGTGTTGGTACCCGGGAAATTCGGCCATTACGGCCGGGGTGGGAATCTGGAAGTAGAAGTCAAGTTAGTTTTGAAGCTAAAAGGGACAGGCAGTCACCAGTCCAATGGCATCTCTAGCAACCTTTGCTGCTGTTCAACCCATCACCGTTAAGGGCCTTGGTGGAAGCTCACTTACCGGAACTAAGCTCCACATCAAGCCAGCTCGCCAGACTTTGAGACCCACCAATTTCAAAGCTGGTGCTGTGGTGGCAAAATATGGTGAAAAGAGTGTGTACTTTGATTTGGAGGATTTGGGCAACACCACTGGCCAATGGGACTTGTATGGTTCCGATGCTCCTTCACCATACAACCCTCTTCAGAGCAAGTTCTTTGAGACATTTGCCGCTCCCTTCACAAAGAGAGGTCTTTTGCTCAAATTCTTGATATTGGGAGGGTGGTTCCACCCCTTGCTTATCTAAGCTCCACAGCCTCGGGGGATATTCTACCAATCAAGAAGGGCCCACAACTTCCTCCAAAGCTTGGTCCCACGTGGAAAAATCTAACTTATTCTAGCTCCTACATCCTTCAACCTCTGGAATTGTGTTTAAAAGGCATCTTTCCTACAGCTTGTAAATATGGTGGGATCCCATCTAAAACCCCTCTGATTATTTCAATAATGTTGGATTGGGGATTTGGGGGGCATTCTTTGGAAACTTTAAGCTTGGGGCT
>DV554965|Panax ginseng||DC05018H03 Panax ginseng cDNA library Panax ginseng cDNA, mRNA sequence.
GTTTTTTTTTTTTTATGCGGAAAGCGCGCCATTGTGTTGGTACCCGGGAAATTCGGCCATTACGGCCGGGGGCCATTCTCAGACCTTGCTTTGAGGAGATATTACCAATTCTCAACCATTACTTCTACCCTCTCTCTTCAAGAAATGGAAACCTTTTTGTTCACATCCGAGTCTGTCAATGAGGGACACCCTGACAAGCTTTGTGACCAGATCTCAGATGCAGTCCTTGATGCCTGCCTAGAACAGGATCCCGAGAGCAAGGTTGCATGTGAGACTTGCACCAAGACCAACATGGTCATGGTCTTTGGAGAGATCACCACCAAGGCCAATGTTGATTATGAGAAGATTGTGCGTGACACCTGCCGTGCAATTGGATTTGTATCTGATGACGTAGGTTTGGATGCTGACAACTGCAAGGTCCTTGTTAACATTGAGCAGCAGAGTCCTGATATTGCCCAGGGAGTCCACGGTCATCTGACCAAGAAACCTGAGGAGATTGGTGCCGGTGACCAAGGACATATGTTTGGTTATGCCACTGATGAGACCCCTGAGCTGATGCCTCTCAGCCATGTTCTTGCAACCAAGCTTGGTGCTCGCCTCACTGAAGTCCGCAAGAATGGTACTTGTGCATGGCTAAGGCCTGATGGTAAAACCCAAGTGACTGTAGAGTACCACAATGAAAATGGTGCCATGATCCCCATCCGTGTCCACACCATCCTCATCTCGACTCAACATGATGAAGACTGTT
>DV554940|Panax ginseng||DC05018F02 Panax ginseng cDNA library Panax ginseng cDNA, mRNA sequence.
ATTTTTTTTTTTTTTCCNCGGGAAAGCGCGCCATTGTGTTGGTACCCGGGAATTCGGCCATTACGGCCGGGGCGCTCAACTCCGCAAACTCATAATTTTCTCTCCATCCATTTTCATTGATTTCAAGTTTCTGAAAATTTTTTGAGAGAGAAAAAATGGGGGAGGTGAAGCGAAAATCTTATGGTGTATGGCCCACCGTGAAGCCTTTTGTTAATGGCGGAGCCTCTGGTATGCTCGCCACCTGTGTCATTCAGCCCATCGACATGATTAAGGTGAGAATTCAATTGGGTCAGGGATCAGCAGCTCATGTGACAAAGGAAATGCTTAAGAATGAGGGGGTTGGTGCCTTCTACAAGGGTTTGTCTGCTGGGCTGCTTAGACAAGCTACATATACAACTGCTCGACTTGGATCATTCAGAATTTTGACAAACAAGGCAATCGCAGCCAATGATGGGAAGCCCCTGCCTTTGTATCAGAAAGCTTTGTGTGGACTAACTGCCGGAGCAATTGGAGCAACTGTTGGTAGTCCAGCAGATTTAGCACTCATCCGCATGCAGGCTGATGCCACCTTACCTGCCGCTCAGCGCCGGAATTACAAGAATGCATTCCATGCTCTCTATCGTATTTCAGCAGATGAAGGAGTTTTGGCCCTCTGGAAAGGTGCTGGCCCTACTGTAGTAAGAGCAATGGCTCTGAACATGGGAATGCTTGCATCTTATGATCAAAGTGTGGAGTTCTTTCAGGATTCTCCTTGGTTTTGTGGAGGGTGCTACAATTCTAGGGGCCAGTTTCGGCGTT
>DV554916|Panax ginseng||DC05018C06 Panax ginseng cDNA library Panax ginseng cDNA, mRNA sequence.
GTTTTTTTTTTTTTTTACNCGGGAAAGCGCGCCATTGTGNTTGGTACCCCGGGAAATTCGGCCATTACGGCCGGGTCTCTCATCGGAAAAAAATTTATACTCTCTATTCAACCTGCCACCATGGATCCCTACAAGTACCGCCCTTCAAGTGCTTTTAATTCCCCTTACTGGACAACAAATTCCGGCGCTCCAGTTTGGAACAACAATGCATCATTGACTGTGGGAACTAGAGGCCCAATCCTCCTTGAGGATTATCATTTGGTGGAGAAACTTGCTAATTTTGATAGGGAGCGGATCCCTGAACGAGTTGTCCACGCAAGGGGTGCCAGTGCCAAGGGTTTCTTTGAGGTCACCCATGATATTTCTCAACTTACATGTGCTGATTTTCTTCGAGCCCCTGGCGTTCAGACACCTGTAATTGTTCGTTTCTCCACTGTTATCCATGAGCGTGGAAGCCCTGAAACCCTCAGGGACCCCCGAGGTTTTGCAGTGAAGTTCTACACCAGAGAGGGTAACTTTGATTTGGTGGGAAACAATTTCCCTGTCTTCTTCGTTCGTGATGGAATGAAATTCCCAGACATGGTCCATGCTCTTAAACCCAATCCGAAGTCTCACATTCAAGAGAACTGGAGAATCTTGGACTTCTTCTCCCACACCCAGAGAGTTTGCACATGTTCACCTTCCTCCTGGATGACATAGGTATTCCACAAGATTACAGGCACATGGAAGGCTCAAGGTGTAACACTTACG
>DV554912|Panax ginseng||DC05018C02 Panax ginseng cDNA library Panax ginseng cDNA, mRNA sequence.
GTTTTTTTTTTTTTTCTCCGCCAAGCGCGCCATTGTGNTTGGTACCCCGGNGAATTCGGCCATTACGGCCGGGGAGTGGGAATCTGGAAGTAGAAGTCAAGTTAGTTTTGAAGCTAAAAGGGACAGGCAGTCACCAGTCCAATGGCATCTCTAGCAACCTTTGCTGCTGTTCAACCCATCACCGTTAAGGGCCTTGGTGGAAGCTCACTTACCGGAACTAAGCTCCACATCAAGCCAGCTCGCCAGACTTTGAGACCCACCAATTTCAAAGCTGGTGCTGTGGTGGCAAAATATGGTGAAAAGAGTGTGTACTTTGATTTGGAGGATTTGGGCAACACCACTGGCCAATGGGACTTGTATGGTTCCGATGCTCCTTCACCATACAACCCTCTTCAGAGCAAGTTCTTTGAGACATTTGCCGCTCCCTTCACAAAGAGAGGTCTTTTGCTCAAATTCTTGATATTGGGAAGGTGGTTCCACCCTTCCTTATCTAAGCTCCACAGCCTCGGGGGATATTCTACCAATCAAGAAAGGCCCACAACTTCCTCCAAAGCTTGGTCCACGTGGAAAAAACTAACTTATTTCTAGCTCCTACATTCCTTCAACCTCTTTGATTGGTGTTTAAAAATGCATTCTTGCCCTACAGGCTTTGAAAGTATGGTTGGAATCCCATTCTAAACACCCATCCTGGATTATTTCCCAATATTGTTTCCGTATTCGCCGATTTGGCGGCGGCATTTCTTTGTAAACCTTTTATGCCTTTGGGCTGGTTGGACTTATCTACTAATATATGGCAT
>DV554858|Panax ginseng||DC05017F08 Panax ginseng cDNA library Panax ginseng cDNA, mRNA sequence.
TTTTTTTTTTTTTATCCGGAAAGCGCGCCATTGTGTATGGTACCCCGGNGAATTCGGCCATTACGGCCGGGGAAGCAGAAGAAAAAAAAACAACTCATAATTTTTTAGTGAGAGAAAGTTTTAGAGGGAGAAATGGGAGGAGAGAATAACTGGAGCATCGGATCAAAGTCATGTGAATCGTGCAAATCAGCCCCGGCGACTCTGTTCTGCCGTGCCGACTCGGCCTTCCTCTGCATGGGCTGCGACGGAAAGATCCACGCCGCGAACAAACTCGCGTCGCGGCACGCGCGCGTGTGGATGTGCGAGGTGTGCGATCAAGCTCCGGCCAGCGTCACGTGCAAGGCGGACGCCGCCGCGCTCTGCGTCACGTGCGACCGTGATATCCACTCCGCCAACCCCCTCGCCCGCCGTCACGAGCGGTTCCCCGTCATTCCGTTTTATGACTCCGCCGCGGCGGCCAAATCAGCCACCGTCCACGGCAGAGACGACCGCTACTTTTCTGATCCGGAGGTGGAGGAGGAGGAGGAGGCCGAGGCTGCGTCGTGGCTACTCCCGAACCCTAACCCTAACACAAATTTCAACAAGATGAATTCGGAGAATTGTCCTGATCTCAAAACGGCTGATTATTTGTTCAAAGATATGGACTCGTATCTGGATATTGATATCATGACAACTGATCAGAAGCCTTTACATCAGCAGAATTACATCTCCGGAAATGCGGATGGGAGTTGTCCCGGTACAGAGTAAAACCTGTTACCAAACC
>DV554795|Panax ginseng||DC05017A05 Panax ginseng cDNA library Panax ginseng cDNA, mRNA sequence.
GTTTTTTTTTTTTTATCGGGAAGCGCGCCTTGTGTTGGTACCCGGGAATTCGGCCATTACGGCCGGGTACCCCGTTCTTTTCCGTGGTGTCAATGGAACAGTTGCCCATGAATTTATTGTTGATTTGAGGGGATTCAAGAATACTGCTGGTATAGAGCCTGAAGATGTTGCAAAACGTCTGATGGACTATGGGTTCCATGGACCAACAATGTCGTGGCCAGTCCCAGGAACACTCATGATCGAACCCACTGAGAGTGAAAGCAAGGCAGAGTTAGACAGGTTTTGTGATGCTCTTATCTCCATCAGAGAAGAAATTGCGCAGATTGAGAAAGGAAAAGTGGACGCTCACAACAATGTTCTCAAGGGAGCACCTCATCCACCATCACTGCTCATGGCAGACAAATGGACAAAACCATACTCTCGAGAATATGCCGCCTTCCCTGCTTCCTGGCTCCGGTCTGCCAAGTTCTGGCCATCCACTGGACGCGTCGACAATGTGTATGGTGACCGGAACCTCGTCTGCACTCTTCTCCCAGCATCACANGGTGGTTGAGGAACAAAAGGCAGCTTCTGCATAAGTTGAGGCATTACACTGCAAAATCATTGTTCCCTCAACAATATGAAATTCCCTTTTCTTCTTTCTGCTCCTCTTCTTGTGTATAATTTATACTCTTTACATTTACTGTCTTTCATCTTTTTACTATATTGATCATTTGCAGCTCTAATAAAAATATTGTTGCTAATTGCAACTCTTAAAAAAAAAAAAAAAAAAAAAAA
>DV554778|Panax ginseng||DC05016G12 Panax ginseng cDNA library Panax ginseng cDNA, mRNA sequence.
CTTATTTTTTTTTTACACGGCAAGCTCGCCATTGTGTTGGTACCCGGGAATTCGGCCTTACGGCCGGGTCAGGGTTTGAGGGAGACAACATGATTGAGAGGTCTACAAACCTTGACTGGTACAAGGGCCCAACTCTCCTTGAGGCTCTTGACCAGATTAATGAGCCCAAGAGGCCCTCTGACAAGCCCCTCCGTCTACCACTTCAGGATGTGTACAAAATTGGTGGTATTGGAACTGTGCCTGTGGGACGTGTTGAGACTGGTACTCTCAAGCCTGGTATGCTTGTCACCTTTGGTCCCACTGGCTTGACAACTGAAGTTAAGTCTGTTGAGATGCACCACGAGTCTCTTGTTGAGGCTCTTCCTGGTGACAATGTGGGCTTCAACGTCAAGAATGTTGCAGTCAAGGATCTCAAGCGTGGTTTTGTTGCATCCAACTCCAAGGATGACCCTGCCAAGGGAGCTGCCAACTTCACATCTCAGGTCATCATCATGAACCACCCTGGACAGATTGGAAATGGATATGCCCCAGTTCTTGATTGCCACACCTCTCACATTGCTGTCAAGTTTGCTGAGCTCTTGACCAAGATCGACAGACGATCTGGCAAGGAGATAGAGAAGGAGCCCAAGTTCTTGAAGAACGGTGATGCTGGAATGGTTAAGATGATTCCAACTAAGCCTATNGGTGGTGGAGACATTCTCCGAGTACCCTCCCTTTGGAAGGTTTTGCTGTTCGGGACAT
>DV554704|Panax ginseng||DC05016A10 Panax ginseng cDNA library Panax ginseng cDNA, mRNA sequence.
GTTTTTTTTTTTTTCAGGCAACGCGCCTTGTGTTGGTACCCGGGAAATTCGGCCATTACNGGCCGGGGNNGACAACCCAAATAAACAAACCACCACAACCTCCCTCTTCACCTTATTCTGCACGCACTAAGCTTAATTGCTACCAAATGGCAGCCATGAACTCCAGTGTGTTGGCATGCAGCTATGCTATATCCGGTACCGGATCGTCGGAGCTAAGCTCCAAGCTTGTTTCATTGCCTTCAGTTGGATCCTCAGTTGTTAAAATGCCAGTTATCAGGGCTCAACAGGCTAGACTTTCTGATTCCAGAGAATCACGCCATGACGGTGTCCAAGGAAGAAGGGCTGCATTTCTTTGCCTCGGAGCTGCCCTTTTCGCCGCCGCCGCCACCACTTCTTCTGCCAATGCTGGAGTTATTGAAGATGCACTCGAGAAATCCAAAGCTAACAAGGAATTGAATGATAAGAAAAGGTTGGCTACGAGTGGAGCAAACTTTGCTAGAGCATATACGAGTTCAGTTTGGCACATGCACTTTCCCATATAACTTCACTGGCTGCCAAGATCTTGCCAAGCAAAAGAAAGTGCCATTTATTTCTGATGATTTGGAGTTGGAGTGCGAAGGAAAGGAAAATACAAGTGTGGTTCCAATGTGTTCTGGAAATGNGTGAAGAGTGTGAAAAATCTATGCTTCTTTACTCTCCTCCTCCACCCATCATGTATCTAATTTTTTTTTCAATTT
>DV554693|Panax ginseng||DC05015H11 Panax ginseng cDNA library Panax ginseng cDNA, mRNA sequence.
ATTATTGTGGTTTTATAGGCAATCTCGCCATTGTGTATGGTACCCCGGGAAATTCGGCCATTACGGCCGGGGGGGAATAATTTAGTTAGCTTTGAAACAAAAGGCAGCAATGGCATCTCTAGCAACCTTTGCTGCTGTTCAGCCCATCACCGTTAAGGGCCTTGGTGCTGGAAGTTCACTTACTGGGACTAAGCTCCACATCAAGCCATCTCGCCAGAGTTTGAGATCCGCCAATTGCAAGGCTGGTGCTGTTGTGGCCAAATATGGTGAAAAGAGTGTCTACTTTGATTTGGAGGATTTGGGCAACACCACCGGTCAGTGGGACTTGTATGGATCTGATGCACCTTCACCATACAACCCTCTTCAGAGCAAGTTCTTTGAGACATTTGCCGCTCCCTTCACTAAGAGAGGCCTTTTGCTCAAATTCTTGATACTGGGAGGTGGTTCCACCCTTGCTTATCTAAGCTCAACAGCCTCAGGGGATGTTCTACCAATCAAGAAGGGACCACAACTTCCACCAAAGCTTGGTCCACGTGGAAAAATCTAATTTTTCTAGATCCTACATCCTTCAACCTCGTGGTTGTGATTAAATGTATCTTCCTTTGTAAGTATGTTTGGATCCCAACTAAGACCCCTTAATTATTTTGAAGTGTTGTTTATGTCATTTGGGGCATTCTTGTTAACTTGATGCTATTCTGATAACCTGATTAATATATTAGACCTGTTAAGATTATATCC
>DV554676|Panax ginseng||DC05015G06 Panax ginseng cDNA library Panax ginseng cDNA, mRNA sequence.
ATTTTTTTTTTTTTACGGGCAAATCGCGCCACTGTGTTGGTACCCGGGAATTCGGCCATTACGGCCGGGGAAAATAAGGAGGCGGGAGTGATAGCACCTAGGTCTCAGGATTTTAATGCTTGGTATCTTGACATCATCGCAAATGCTGAGCTCGCCGATTACGGCCCGGTTCGCGGTACTATGGTTATCCGACCATACGGTTACGCCATTTGGGAAGCAATTCAGGATTATTTAAATGTTAAGTTCAAGGAGACTGGTCATAGTAACATGTACTTCCCACAGTTTATACCATACTCATTCATAGAGAAAGAGGCTAGCCATGTTGAGGGATTTAGTCCAGAATTAGCCCTTGTGACAATTGGTGGAGGGAAGGAACTTGAAGAAAAACTTGTGGTTCGACCTACTAGCGAAACCATTGTAAATCACATGTTTACTCAGTGGATTCATAGTTATCGTGATCTTCCTCTAATGATCAACCAGTGGGCAAATGTCACAAGATGGGAGATGCGCACTAAACCCTTTGTGAGGACGCTTGAATTTCTTTGGCAGGAGGGACATACTGCTCATGCCACTCCAGAGGAGGCAGAAAAAGAGGCATTACAGATGATTGATGTCTATACGAAATTTGCTTATGAGCAAGCTGCAATACCTGTTATTGCAGGTCGAAAATCCAAGGTTGAGACGTTTGCCGGTGCTGCCAAGACATATACAATTGAAGCTATGATGGGGGTGATCGTAG
>DV554601|Panax ginseng||DC05015A03 Panax ginseng cDNA library Panax ginseng cDNA, mRNA sequence.
TTATTTTGTTTTTATCGGCAACTCGCCTTGTGTTGGTACCCGGGAAATTCGGCCATTACGGCCGGGGGAAGCAAGGAGTTTGCGGCACAGAGGGAGGGAGAGAGAGGGAGACGCAGCTTAATCGAACAAAGAAACCATGGCTAGAGGTTTGAAGAAGCATTTGAAGAGGCTCAATGCCCCTAAGCATTGGATGCTCGATAAACTTGGTGGTGCATTTGCTCCCAAGCCTTCATCTGGACCCCATAAATCCAGGGAATGCCTGCCTTTGATTCTTATTTTGCGAAACAGGCTGAAGTATGCTCTAACTTACCGTGAAGTCCAATCCATCTTGATGCAACGACATGTTCTTGTTGATGGGAAGGTTAGGACGGATAAGACCTATCCAGCTGGTTTCATGGATGTTGTATCAATTCCCAAGACTAATGAGAATTTCCGTCTCCTCTATGACACGAAGGGTAGATTCCGCCTACACTCGGTCAGGGATGAGGAGGCAAAGTTTAAGTTGTGCAAAGTTAGGTCAGTTCAGTTCGGTCAGAAAGGCATTCCGTACATCAATACCTATGATGGGCGTACTATCCGTTATCCAGATCCGCTCATTAAGGCCAATGACACCATCAAACTTGACTTGGAGGCAAACAAGATAGCTGATTTCATTAAGTTCGATGTTGGAAATGTTGTCATGGTGACTGGGGGGAGGAATACTGGGCGAGTTGGAATT
>DV554575|Panax ginseng||DC05014G01 Panax ginseng cDNA library Panax ginseng cDNA, mRNA sequence.
TTTTTTTTTTTTTACCCGGAAAGCGCGCCATTGTGTTGGTACCCGGNGAATTCGGCCATTACGGCCGGGGAATGGCATCTCTAGCAACCTTTGCTGCTGTTCAGCCCATCACCGTTAAGGGCCTTGGTGCTGGAAGTTCACTTACTGGGACTAAGCTCCACATCAAGCCATCTCGCCAGAGTTTGAGATCCGCCAATTACAAGGCTGGTGCTGTTGTGGCCAAATATGGTGAAAAGAGTGTCTACTTTGATTTGGAGGATTTGGGCAACACCACCGGTCAGTGGGACTTGTATGGATCTGATGCACCTTCACCATACAACCCTCTTCAGAGCAAGTTCTTTGAGACATTTGCCGCTCCCTTCACTAAGAGAGGCCTTTTGCTCAAATTCTTGATACTGGGAGGTGGTTCCACCCTTGCTTATCTAAGCTCAACAGCCTCAGGGGATGTTCTACCAATCAAGAAGGGACCACAACTTCCACCAAAGCTTGGTCCACGTGGAAAAATCTAATTTTTCTAGATCCTACATCCTTCAAACTCGTGGTTGTGATTAAATGTATCTTCCTTTGTAAGTATGTTTGGATCCCAACTAAGACCCCTTAATTATTTTGAAGTGTTGTTTATGTCATTTGGGGCATTCTTGTTAACTTGATGCTATTCTGATAACCTGAAAANNAAAAAAAAAAAAAAAAAAAAAACATGTCGGCCGCCTGGGCCCAGTCGACTCTAAT
>DV554568|Panax ginseng||DC05014F06 Panax ginseng cDNA library Panax ginseng cDNA, mRNA sequence.
ATTTTTTTTTTTTATAGGCAAANCGCGCCATTGTGTTGGTACCCGGGAATTCGGCCATTACGGCCGGGGGACGAAAATACATCTACGTCTCCCCTATAAAAACAGCTCCTCCTCGCCCCTGAAACTTTGCCATTCCCATACCTTGCTTCAAGGAGGAGGAGAGTACCAAGTTCTAACCATATTTATAGGCACTTTCTCTTTCTACTTTTTCTCTCTTTAAGGAATGGATACATTCTTGTTCACATCTGAGTCCGTCAATGAGGGACATCCCGACAAACTTTGTGACCAGATCTCAGATGCAGTCCTTGATGCTTGCCTAGCACAGGACCCTGAGAGCAAGGTTGCCTGTGAGACCTGCACCAAGACCAACATGGTCATGGTCTTTGGAGAAATCACCACCAAGGCTGATATAGATTATGAGAAAATTGTGCGTGACACTTGCCGTGCAATTGGATTTGTATCTGATGATGTGGGTTTGGATGCCGTCAACTGCAAGGTCCTTGTCAACATTGAGCAACAGAGCCCTGATATTGCCCAAGGTGTCCACGGTAATCTGACCAAGAGACCTGAGGAGATTGGTGCTGGTGACCAAGGTCATATGTTTGGTTATGCAACTGATGAGACCCCGGAGCTGATGCCCCTCAGCCATGTTCTTGCTACTAAGCTTGGAGCTCGCCTAACTGAAGTCCGCAAGAATGGTACTTGTGCCTGGCTAAGGCCTGATGGTAAAACCCAGGTGACTGGTTGAGTACCAGAACGACAATGG
>DV554559|Panax ginseng||DC05014E09 Panax ginseng cDNA library Panax ginseng cDNA, mRNA sequence.
GTTTTTTTTTTTTTCTCGGGAGCGCGCCTTGTGTTGGTACCCGGGATTTCGGCACTTACGGCCGGGTCGAGGCCCTTGACTTGATTATATGAACCCAAGAGGCCCTTTGACATGCCCCTCCGTCTCCCACTTCAGGATGTGTACAAGATTGGTGGTATTGGAACTGTGCCAGTGGGAAGAGTTGAGACTGGTACTCTCAAGCCAGGAATGGTCGTTACCTTTGGCCCTACTGGTCTCACAACTGAAGTTAAGTCTGTTGAGATGCACCACGAGTCGCTTGTTGAGGCTATACCTGGTGACATTGTTGGCTTCAATGTCAAGAATGTTGCTGTGAAGGATCTCAAACGTGGGTATGTTGCTTCCAACTCCAAGGATGACCCTGCCAAGGGAGCTGCCAACTTCACATCTCAGGTCATCATTATGAACCACCCTGGCCAGATTGGAAATGGTTATGCCCCAGTCCTTGATTGTCACACCTCCCACATTGCTGTTAAGTTTGCTGAGCTTTTGACCAAGATTGACAGGCGGTCTGGTAAGGAGATTGAGAAAGAGCCCAAGTTCTTGAAGAATGGAGATGCTGGAATGGATAAGATGCTATCAACGAAGCCCATGGTAGGTGGAGACTATCTCTGAGTACCCTCCTCTTGGAAGGATTGCTGTTCGTGACATGAGACAAACAGTTGCAGTNTGGATTCATCAAGGCTGTTGATAAGAAAGGATCCCACCCGTTGCCCAGGGTTACCAAGGCTTGCAGCATAGA
>DV554529|Panax ginseng||DC05014C03 Panax ginseng cDNA library Panax ginseng cDNA, mRNA sequence.
TTTTTTTTTTTTTCTCGGGAAGCGCGCCTTGTGTTGGTACCCGGGAATTCGGCCATTACGGCCGGGGGCCATTCTCAGACCTTGCTTTGAGGAGATATTACCAATTCTCAACCATTACTTCTACCCTCTCTCTTCAAGAAATGGAAACCTTTTTGTTCACATCCGAGTCTGTCAATGAGGGACACCCTGACAAGCTTTGTGACCAGATCTCAGATGCAGTCCTTGATGCCTGCCTAGAACAGGATCCCGAGAACAAGGTTGCATGTGAGACTTGCACCAAGACCAACATGGTCATGGTCTTTGGAGAGATCACCACCAAGGCCAATGTTGATTATGAGAAGATTGTGCGTGACACCTGCCGTGCAATTGGATTTGTATCTGATGACGTAGGTTTGGATGCTGACAACTGCAAGGTCCTTGTTAACATTGAGCAGCAGAGTCCTGATATTGCCCAGGGAGTCCACGGTCATCTGACCAAGAAACCTGAGGAGATTGGTGCCGGTGACCAAGGACATATGTTTGGTTATGCCACTGATGAGACCCCTGAGCTGATGCCTCTCAGCCATGTTCTTGCAACCAAGCTTGGTGCTCGCCTCACTGAAGTCCGCAAGAATGGTACTTGTGCATGGCTAAGGCCTGATGGTAAAACCCAAGTGACTGTAGAGTACCACAATGAAAATGGTGCCATGATCCCCATCCGTGTCCACACCATCCTCATCTCGACTCAACATGATNGAGACTGTTACAAATGATGAGAT
>DV554518|Panax ginseng||DC05014B04 Panax ginseng cDNA library Panax ginseng cDNA, mRNA sequence.
ATTTTTTTTGTTTTTTTATGCGCGAAAGGCGTCGCCATCGTGTGTGGGTACCCCGGGAAATTCGGCCATTACGGCCGGGGGTGGAATGAAAGGTGGTAGCAAAGTTGTGGTTGAGCCTCATAGACACGAAGGTGTGTTTATTGCTAAGGGAAAAGAAGATGCTCTTTGTACTAAGAACATGGTTCCTGGTGAAGCTGTGTACAATGAGAAGAGGGTATCCGTTCAGAATGAAGATGGAACTAAGGTTGAGTACAGGGTATGGAATCCCTTCCGTTCTAAGTTGGCGGCTGCCATTCTTGGAGGAGTTGACAACATCTGGATAAAACCTGGTGCTCGGGTTCTGTATCTTGGAGCTGCTTCTGGAACAACCGTCTCTCATGTGTCTGATCTTGTTGGCCCTTCTGGAGTAGTCTATGCCGTTGAATTTTCTCACAGAAGTGGTAGGGACTTGGTTAACATGGCAAAGAAGCGAACTAATGTTATACCTATTATTGAGGATGCTAGGCATCCAGCCAAGTACCGTATGCTTGTTGGGATGGTTGATGTGATATTTTCTGATGTTGCTCAGCCTGATCAGGCAAGAATTTTGGCTTTGAATGCATCGTACTTCTTGAAAGCTGGAGGTCATTTTGTTATATCAATCAAGGCAAACTGCATAGACTCGACTGTTCCGGCTGAGGCCGTCTTTGCTCANGAAGTGAAGAAACTACAAGCAGATCAATTCAAGCCTAGTGAGCAGGTCACCCTTGAACCCTTTGAGAGAACCT
>DV554435|Panax ginseng||DC05013C05 Panax ginseng cDNA library Panax ginseng cDNA, mRNA sequence.
TTTTTTTTTTTTTATGCGGAAAGCGCGCCATTGTGTTGGTACCCGGGAATTCGGCCATTACGGCCGGGGTCCCATAATAATTTGTGTAAAAAGGTTGGGTTTGTTTTAGCTAGTAGCATCAATGTCTCCTGCTAAAGTTGACAATGCAAAAAAGGGCGATCCAAAGGCTCAGGCCTTGAAGGCTGCTAAGGCTGTCAAGGGTTCATCAACATTCAAGAAGAAAGCTAAGAAGATCAGAACATCTGTTACCTTTCACCGGCCGAAGACATTGAAGAAGGACAGGAACCCAAAGTATCCCCGTATCAGTGCGCCTCCAAGAAACAAATTGGACCATTATCAAATACTCAAATATCCACTGACCACAGAATCTGCTATGAAGAAGATCGAAGATAATAATACCCTTGTCTTCATTGTTGACATCCGTGCTGACAAGAAGAAGATAAAAGATGCAGTTAAAAAGATGTATGACATTCAAACCAAGAAAGTGAACACTTTGATCAGGCCTGATGGAACCAAGAAGGCTTATGTCCGCTTGACTCCTGATTACGATGCATTGGATGTGGCGAACAAGATTGGAATCATCTAAAGATAGATTTTATTTCTTCTCTTCCTAGGAAATTCATCCTTTGGTATAATGACAGTTTTGTTGATCTTTAGTAGTGTTTCAATTTTAATGTCCTACTTTGAACATGTTAAAGCTCTAGTAGGCTTTAAAATGCCTTCTTGATCATGTTGTGTATGACTATGTTATAAT
>DV554429|Panax ginseng||DC05013B11 Panax ginseng cDNA library Panax ginseng cDNA, mRNA sequence.
ATTTTTTTTTTTTTCGGGGAAGCGCGCCTTGTGTTGGTACCCGGGAATTCGGCCATTACGGCCGGGGTCCCATAATAATTTGTGTAAAAAGGTTGGGTTTGTTTTAGCTAGTAGCATCAATGTCTCCTGCTAAAGTTGACAATGCAAAAAAGGGCGATCCAAAGGCTCAGGCCTTGAAGGCTGCTAAGGCTGTCAAGGGTTCATCAACATTCAAGAAGAAAGCTAAGAAGATCAGAACATCTGTTACCTTTCACCGGCCGAAGACATTGAAGAAGGACAGGAACCCAAAGTATCCCCGTATCAGTGCGCCTCCAAGAAACAAATTGGACCATTATCAAATACTCAAATATCCACTGACCACAGAATCTGCTATGAAGAAGATCGAAGATAATAATACCCTTGTCTTCATTGTTGACATCCGTGCTGACAAGAAGAAGATAAAAGATGCAGTTAAAAAGATGTATGACATTCAAACCAAGAAAGTGAACACTTTGATCAGGCCTGATGGAACCAAGAAGGCTTATGTCCGCTTGACTCCTGATTACGATGCATTGGATGTGGCGAACAAGATTGGAATCATCTAAAGATAGATTTTATTTCTTCTCTTCCTAGGAAATTCATCCTTTGGTTAATGACAGTTTTGTTGATCTTTAGTAGTGTTTCAATTNTAATGTCCTACTTTGAACATGTTAAAGCTCTAGTAGGCTNTAAAATGCCTTCTTGATCAATGTTGTGTATGACCTATGTATAANTTTGATCCTTTATTTTATTTTTCCTAAAAAAAANAAANNNAAANAAAAAAAAACTTGT
>DV554381|Panax ginseng||DC05012F11 Panax ginseng cDNA library Panax ginseng cDNA, mRNA sequence.
[truncated: 69,408 more chars]
